# Supplementary material
Source: publisher figshare collection journal article supplement (https://gsajournals.figshare.com/ndownloader/files/24368984)
Supplement: Supplementary file 1 [file 24368984]

## Sheet: Sheet1
Supplemental Table S2, A. N. Gale																							normalizations						z-score parameters
																							1.111	1.171					m1	0.098996
C. glabrata genes that alter susceptibility to fluconazole																													m2	6.4967
																													m3	-0.63167
																					rep1	rep1	rep2	rep2	avg	avg			z-score			Schwarzmuller	Kaur
Feature Name	Gene name	length	cen dist	Chromosome	Start Coordinate	Stop Coordinate	Strand	Aliases	Cg ess.?	Primary CGDID	Name of S. cerevisiae ortholog(s) (multiples separated by |)	Sc ortholog from CGD	Sc ortholog from Anc_ (YGOB)	Ancestor (YGOB)	cons Sc ortholog	cons Sc gene		Cg dup?		note	+0	+Fluc	+0	+Fluc	+0	+Fluc		avg	Flu/0	log(2)ratio		Flu/0	Flu/0
CAGL0C01199g	UPC2A	2769	-298824	ChrC	124712	121944	C	ZCF5|CAGL-IPF7220|CAGL-CDS0564.1|CAG58132.1		CAL0127396	ECM22		YLR228C	Anc_8.423	YLR228C	ECM22	Sterol regulatory element binding protein; regulates transcription of sterol biosynthetic genes; contains Zn[2]-Cys[6] binuclear cluster; relocates from intracellular membranes to perinuclear foci on sterol depletion; ECM22 has a paralog, UPC2, that arose from the whole genome duplication	dup			561	9	492	15	554.806	14.2825		284.544	-18.7217	-5.27966
CAGL0J07436g	PDR16	1035	503131	ChrJ	719991	721025	W	CAGL-IPF2378|CAGL-CDS3202.1|CAG60981.1		CAL0132814	PDR16	YNL231C	YNL231C	Anc_2.012	YNL231C	PDR16	Phosphatidylinositol transfer protein (PITP); controlled by the multiple drug resistance regulator Pdr1p; localizes to lipid particles and microsomes; controls levels of various lipids, may regulate lipid synthesis; homologous to Pdr17p; protein abundance increases in response to DNA replication stress				30	2	23	0	28.7765	2		15.3882	-3.06635	-3.84682
CAGL0J08074g		1044	577812	ChrJ	794667	795710	W	CAGL-IPF6743|CAGL-CDS3182.1|CAG61010.1		CAL0133026	PDR17	YNL264C	YNL264C	Anc_1.091	YNL264C	PDR17	Phosphatidylinositol transfer protein (PITP); downregulates Plb1p-mediated turnover of phosphatidylcholine, found in the cytosol and microsomes, homologous to Pdr16p, deletion affects phospholipid composition				766	309	562	340	696.191	354.57		525.38	-4.36052	-0.973413		0
CAGL0A00451g	PDR1	3324	-28087	ChrA	47557	50880	W	CAGL-IPF3325|CAGL-CDS0315.1|CAG57683.1|ZCF1		CAL0126583	PDR1	YGL013C	YGL013C	Anc_4.113	YGL013C	PDR1	Transcription factor that regulates the pleiotropic drug response; zinc cluster protein that is a master regulator involved in recruiting other zinc cluster proteins to pleiotropic drug response elements (PDREs) to fine tune the regulation of multidrug resistance genes; relocalizes to the cytosol in response to hypoxia; PDR1 has a paralog, PDR3, that arose from the whole genome duplication				172	91	132	45	160.326	72.8475		116.587	-2.70612	-1.13806		-3	-2
CAGL0M01760g	CDR1	4500	-843743	ChrM	203616	208115	W	CAGL-IPF6352|CAGL-CDS0106.1|CAG62397.1		CAL0136775				Anc_5.500	YOR153W	PDR5	Plasma membrane ATP-binding cassette (ABC) transporter; multidrug transporter actively regulated by Pdr1p	dup			571	60	681	145	664.795	115.898		390.346	-10.1257	-2.52006		-3	-4
CAGL0J00297g		1695	-195482	ChrJ	21048	22742	W	CAGL-IPF7812|CAGL-CDS1703.1|CAG60671.1		CAL0132812	YHR045W	YHR045W	YHR045W	Anc_5.287	YHR045W		Putative protein of unknown function; possible role in iron metabolism and/or amino acid and carbohydrate metabolism; green fluorescent protein (GFP)-fusion protein localizes to the endoplasmic reticulum				102	10	109	40	112.549	29.42		70.9847	-3.59186	-1.93569
CAGL0F03553g	DAP1	459	121221	ChrF	347695	347237	C	CAGL-IPF1755|CAGL-CDS4810.1|CAG59048.1		CAL0131394	DAP1	YPL170W	YPL170W	Anc_8.701	YPL170W	DAP1	Heme-binding protein; involved in regulation of cytochrome P450 protein Erg11p; damage response protein, related to mammalian membrane progesterone receptors; mutations lead to defects in telomeres, mitochondria, and sterol synthesis				310	109	244	83	291.542	104.096		197.819	-4.51261	-1.48578
CAGL0F06347g	STV1	2733	400305	ChrF	625184	627916	W	CAGL-IPF449|CAGL-CDS0587.1|CAG59167.1		CAL0129296	STV1	YMR054W	YMR054W	Anc_2.617	YMR054W	STV1	Subunit a of the vacuolar-ATPase V0 domain; one of two isoforms (Stv1p and Vph1p); Stv1p is located in V-ATPase complexes of the Golgi and endosomes while Vph1p is located in V-ATPase complexes of the vacuole				1885	506	1639	510	1853.96	552.605		1203.28	-10.1174	-1.74629			-2
CAGL0L11110g	CNA1	1728	196137	ChrL	1184182	1182455	C	CAGL-IPF4208|CAGL-CDS1636.1|CAG62225.1		CAL0136126	CMP2	YML057W	YML057W	Anc_4.313	YML057W	CMP2	Calcineurin A; one isoform (the other is Cna1p) of the catalytic subunit of calcineurin, a Ca++/calmodulin-regulated protein phosphatase which regulates Crz1p (a stress-response transcription factor), the other calcineurin subunit is CNB1; regulates the function of Aly1p alpha-arrestin; CMP2 has a paralog, CNA1, that arose from the whole genome duplication				42	10	46	10	47.553	11.855		29.704	-2.32566	-2.00404		-1
CAGL0L00605g	CNB1	528	-911665	ChrL	75253	75780	W	CAGL-IPF7524|CAGL-CDS4637.1|CAG61770.1		CAL0135884		YKL190W	YKL190W	Anc_4.292	YKL190W	CNB1	Calcineurin B; regulatory subunit of calcineurin, a Ca++/calmodulin-regulated type 2B protein phosphatase which regulates Crz1p (stress-response transcription factor); other calcineurin subunit encoded by CNA1 and/or CMP1; regulates function of Aly1p alpha-arrestin; myristoylation by Nmt1p reduces calcineurin activity in response to submaximal Ca signals, is needed to prevent constitutive phospha…				0	0	0	0	1	1		1	0	0		-1
CAGL0I07227g	IDH2	1107	-95622	ChrI	697711	696605	C	CAGL-IPF1484|CAGL-CDS2995.1|CAG60501.1		CAL0129777	IDH2	YOR136W	YOR136W	Anc_5.473	YOR136W	IDH2	Subunit of mitochondrial NAD(+)-dependent isocitrate dehydrogenase; complex catalyzes the oxidation of isocitrate to alpha-ketoglutarate in the TCA cycle; phosphorylated			mito	392	1008	347	604	389.759	858.642		624.2	5.4153	1.13948
CAGL0G02673g	IDH1	1077	186210	ChrG	247531	246455	C	CAGL-IPF3580|CAGL-CDS3090.1|CAG59406.1		CAL0130695		YNL037C	YNL037C	Anc_2.278	YNL037C	IDH1	Subunit of mitochondrial NAD(+)-dependent isocitrate dehydrogenase; complex catalyzes the oxidation of isocitrate to alpha-ketoglutarate in the TCA cycle			mito	2259	5763	2492	4411	2514.81	5465.14		3989.97	8.38711	1.11981
CAGL0F01133g		1599	-110558	ChrF	116486	114888	C	CAGL-IPF3739|CAGL-CDS1886.1|CAG58947.1		CAL0129181	MSE1	YOL033W	YOL033W	Anc_7.100	YOL033W	MSE1	Mitochondrial glutamyl-tRNA synthetase; predicted to be palmitoylated			mito	6	151	44	149	28.442	163.74		96.0908	5.46227	2.52531
CAGL0H05489g		729	-422555	ChrH	532144	532872	W	CAGL-IPF4426|CAGL-CDS4065.1|CAG59967.1		CAL0131524	ATP4	YPL078C	YPL078C	Anc_8.549	YPL078C	ATP4	Subunit b of the stator stalk of mitochondrial F1F0 ATP synthase; ATP synthase is a large, evolutionarily conserved enzyme complex required for ATP synthesis; contributes to the oligomerization of the complex, which in turn determines the shape of inner membrane cristae; phosphorylated			mito	85	586	95	420	96.2725	539.91		318.091	9.22784	2.48752
CAGL0M06259g		2556	-399642	ChrM	651244	648689	C	CAGL-IPF6136|CAGL-CDS0686.1|CAG62595.1		CAL0136361	FZO1	YBR179C	YBR179C	Anc_8.573	YBR179C	FZO1	Mitofusin; integral membrane protein involved in mitochondrial outer membrane tethering and fusion; role in mitochondrial genome maintenance; efficient tethering and degradation of Fzo1p requires an intact N-terminal GTPase domain; targeted for destruction by the ubiquitin ligase SCF-Mdm30p and the cytosolic ubiquitin-proteasome system			mito	37	235	42	193	42.831	231.502		137.166	6.2551	2.43429
CAGL0J10230g		1632	784012	ChrJ	1002204	1000573	C	CAGL-IPF2813|CAGL-CDS1810.1|CAG61107.1		CAL0133138	MSK1	YNL073W	YNL073W	Anc_2.223	YNL073W	MSK1	Mitochondrial lysine-tRNA synthetase; required for import of both aminoacylated and deacylated forms of tRNA(Lys) into mitochondria and for aminoacylation of mitochondrially encoded tRNA(Lys)			mito	7	87	24	88	17.832	96.024		56.928	4.01667	2.42893
CAGL0F07172g		2160	475920	ChrF	701085	703244	W	CAGL0F07161g_CAGL0F07183g|CAGL0F07161g|CAGL-IPF514|CAG59204.1|CAGL0F07183g|CAG59205.1|CAGL-IPF516|CAGL-CDS2673.1		CAL0000209406	COQ8		YGL119W	Anc_6.133	YGL119W	COQ8	Protein required for ubiquinone biosynthesis and respiratory growth; exhibits genetic interaction with COQ9, suggesting a common function; similar to prokaryotic proteins involved in early steps of ubiquinone biosynthesis; COQ8 has a paralog, YBR230W-A, that arose from the whole genome duplication			mito	12	118	15	37	15.3325	81.6635		48.498	3.66405	2.4131
CAGL0H03883g		1107	-591651	ChrH	362859	363965	W	CAGL-IPF1894|CAGL-CDS3266.1|CAG59896.1		CAL0130078		YNL005C	YNL005C	Anc_1.410	YNL005C	MRP7	Mitochondrial ribosomal protein of the large subunit			mito	16	261	81	264	53.9955	286.072		170.034	6.82689	2.40547
CAGL0J00429g	COX6	459	-182503	ChrJ	34645	35103	W	CAGL-IPF7801|CAGL-CDS4818.1|CAG60677.1		CAL0132860	COX6	YHR051W	YHR051W	Anc_5.280	YHR051W	COX6	Subunit VI of cytochrome c oxidase (Complex IV); Complex IV is the terminal member of the mitochondrial inner membrane electron transport chain; expression is regulated by oxygen levels			mito	242	1304	175	822	219.213	1134.28		676.747	11.5749	2.37138
CAGL0K12628g		3981	991147	ChrK	1250857	1246877	C	CAGL-IPF4625|CAGL-CDS0173.1|CAG61728.1		CAL0133811	RPO41	YFL036W	YFL036W	Anc_8.028	YFL036W	RPO41	Mitochondrial RNA polymerase; single subunit enzyme similar to those of T3 and T7 bacteriophages; requires a specificity subunit encoded by MTF1 for promoter recognition; Mtf1p interacts with and stabilizes the Rpo41p-promoter complex, enhancing DNA bending and melting to facilitate pre-initiation open complex formation			mito	67	415	97	396	88.3835	440.358		264.371	7.96956	2.31683
CAGL0I08877g		1035	70366	ChrI	863663	862629	C	CAGL-IPF4384|CAGL-CDS3204.1|CAG60570.1		CAL0132634	MRPS35	YGR165W	YGR165W	Anc_5.166	YGR165W	MRPS35	Mitochondrial ribosomal protein of the small subunit; null mutant does not grow on glycerol, is sensitive to 2,4-dichlorophenol, and accumulates large lipid droplets			mito	94	672	162	593	137.991	684.202		411.096	9.46447	2.30985
CAGL0L02893g		1581	-646072	ChrL	340320	341900	W	CAGL-IPF2756|CAGL-CDS1924.1|CAG61867.1		CAL0135692	GEP3	YOR205C	YOR205C	Anc_8.616	YOR205C	GEP3	Protein required for mitochondrial ribosome small subunit biogenesis; null mutant is defective in respiration and in maturation of 15S rRNA; protein is localized to the mitochondrial inner membrane; null mutant interacts synthetically with prohibitin (Phb1p)			mito	138	807	167	684	162.769	804.982		483.875	10.0327	2.30613
CAGL0M04037g		930	-601019	ChrM	448125	449054	W	CAGL-IPF6763|CAGL-CDS3531.1|CAG62498.1		CAL0136541	ATP11	YNL315C	YNL315C	Anc_3.030	YNL315C	ATP11	Molecular chaperone; required for the assembly of alpha and beta subunits into the F1 sector of mitochondrial F1F0 ATP synthase			mito	21	302	63	132	46.4965	229.286		137.891	5.92974	2.30195
CAGL0K09768g		1455	698549	ChrK	955542	956996	W	CAGL-IPF3177|CAGL-CDS2164.1|CAG61606.1		CAL0133891	NAM9	YNL137C	YNL137C	Anc_2.129	YNL137C	NAM9	Mitochondrial ribosomal component of the small subunit			mito	36	177	36	175	38.998	191.963		115.48	5.44236	2.29935
CAGL0M09581g	ATP1	1632	-97739	ChrM	952685	951054	C	CAGL-IPF9540|CAGL-CDS1821.1|CAG62739.1		CAL0137183	ATP1	YBL099W	YBL099W	Anc_7.432	YBL099W	ATP1	Alpha subunit of the F1 sector of mitochondrial F1F0 ATP synthase; which is a large, evolutionarily conserved enzyme complex required for ATP synthesis; F1 translationally regulates ATP6 and ATP8 expression to achieve a balanced output of ATP synthase genes encoded in nucleus and mitochondria; phosphorylated			mito	182	1081	197	768	201.433	991.164		596.299	10.7581	2.29882
CAGL0L08030g		1404	-109377	ChrL	877103	878506	W	CAGL-IPF7608|CAGL-CDS2274.1|CAG62095.1		CAL0135682	SLM5	YCR024C	YCR024C	Anc_1.449	YCR024C	SLM5	Mitochondrial asparaginyl-tRNA synthetase			mito	105	537	114	488	116.827	555.224		336.025	8.52558	2.2487
CAGL0A02387g		960	181841	ChrA	258667	259626	W	CAGL-IPF2962|CAGL-CDS3415.1|CAG57761.1		CAL0126695	MRP1	YDR347W	YDR347W	Anc_5.398	YDR347W	MRP1	Mitochondrial ribosomal protein of the small subunit; MRP1 exhibits genetic interactions with PET122, encoding a COX3-specific translational activator, and with PET123, encoding a small subunit mitochondrial ribosomal protein			mito	32	234	73	262	57.5515	271.401		164.476	6.25479	2.2375
CAGL0K11044g		852	819939	ChrK	1077233	1078084	W	CAGL-IPF3266|CAGL-CDS3727.1|CAG61659.1		CAL0134433	MRPL7	YDR237W	YDR237W	Anc_8.461	YDR237W	MRPL7	Mitochondrial ribosomal protein of the large subunit; MRPL7 produces both YmL5 and YmL7, which are two different modified forms of the same protein			mito	8	175	66	182	41.663	195.061		118.362	5.33442	2.22709
CAGL0I06534g		1161	-157742	ChrI	635618	634458	C	CAGL-IPF1432|CAGL-CDS2854.1|CAG60471.1		CAL0132484	OXA1	YER154W	YER154W	Anc_8.206	YER154W	OXA1	Mitochondrial inner membrane insertase; mediates the insertion of both mitochondrial- and nuclear-encoded proteins from the matrix into the inner membrane; also has a role in insertion of carrier proteins into the inner membrane; interacts with mitochondrial ribosomes; conserved from bacteria to animals			mito	165	708	163	780	174.046	811.69		492.868	9.72835	2.22146
CAGL0M05929g		561	-424332	ChrM	625557	624997	C	CAGL-IPF9088|CAGL-CDS4552.1|CAG62580.1		CAL0136843	PAM17	YKR065C	YKR065C	Anc_1.196	YKR065C	PAM17	Constituent of the TIM23 complex; proposed alternatively to be a component of the import motor (PAM complex) or to interact with and modulate the core TIM23 (Translocase of the Inner mitochondrial Membrane) complex; protein abundance increases in response to DNA replication stress			mito	83	682	114	236	105.827	480.178		293.002	7.83003	2.18186		0
CAGL0A04653g		1629	381098	ChrA	459218	457590	C	CAGL-IPF1123|CAGL-CDS1822.1|CAG57863.1		CAL0126535	PET112	YBL080C	YBL080C	Anc_7.403	YBL080C	PET112	Subunit of the trimeric GatFAB AmidoTransferase(AdT) complex; involved in the formation of Q-tRNAQ; mutation is functionally complemented by the bacterial GatB ortholog			mito	88	520	142	509	123.881	559.019		341.45	8.29431	2.17394
CAGL0M07513g		1077	-294233	ChrM	755914	754838	C	CAGL-IPF9556|CAGL-CDS3098.1|CAG62651.1		CAL0136295	MRPL3	YMR024W	YMR024W	Anc_2.574	YMR024W	MRPL3	Mitochondrial ribosomal protein of the large subunit; located in close proximity to the polypeptide exit channel of the ribosome; mutations in human homolog MRPL44 cause childhood cardiomyopathy; human MRPL44 deficiency results in inefficient assembly of the mitochondrial ribosome, and in tissue-specific respiratory chain deficiency, manifesting as either Complex I+Complex IV or Complex IV defici…			mito	91	468	103	391	103.716	463.93		283.823	7.65587	2.16126
CAGL0M11286g		1017	61263	ChrM	1110364	1111380	W	CAGL-IPF8826|CAGL-CDS3262.1|CAG62811.1		CAL0137331	MTF1	YMR228W	YMR228W	Anc_8.755	YMR228W	MTF1	Mitochondrial RNA polymerase specificity factor; has structural similarity to S-adenosylmethionine-dependent methyltransferases and functional similarity to bacterial sigma-factors; Mtf1p interacts with and stabilizes the Rpo41p-promoter complex, enhancing DNA bending and melting to facilitate pre-initiation open complex formation			mito	173	993	261	926	232.486	1039.67		636.079	10.3344	2.16092
CAGL0H01397g		624	-817423	ChrH	137951	137328	C	CAGL-IPF5812|CAGL-CDS4389.1|CAG59792.1		CAL0131794	ATP5	YDR298C	YDR298C	Anc_5.315	YDR298C	ATP5	Subunit 5 of the stator stalk of mitochondrial F1F0 ATP synthase; F1F0 ATP synthase is a large, evolutionarily conserved enzyme complex required for ATP synthesis; homologous to bovine subunit OSCP (oligomycin sensitivity-conferring protein); phosphorylated			mito	265	1298	243	935	268.486	1197.44		732.965	10.8031	2.15703
CAGL0K09482g		1950	679632	ChrK	936377	938326	W	CAGL-IPF8800|CAGL-CDS1273.1|CAG61595.1		CAL0133869	MDM32	YOR147W	YOR147W	Anc_5.483	YOR147W	MDM32	Mitochondrial inner membrane protein with similarity to Mdm31p; required for normal mitochondrial morphology and inheritance; interacts genetically with MMM1, MDM10, MDM12, and MDM34			mito	90	540	90	265	95.995	426.158		261.076	7.35833	2.15036
CAGL0L12606g		2952	369798	ChrL	1355504	1358455	W	CAGL-IPF8586|CAGL-CDS0468.1|CAG62290.1		CAL0135170	ISM1	YPL040C	YPL040C	Anc_8.488	YPL040C	ISM1	Mitochondrial isoleucyl-tRNA synthetase; null mutant is deficient in respiratory growth			mito	219	1092	293	1127	273.262	1206.86		740.06	10.7653	2.1429
CAGL0L02783g		2676	-660892	ChrL	324952	327627	W	CAGL-IPF2768|CAGL-CDS0614.1|CAG61862.1		CAL0134972	MGM1	YOR211C	YOR211C	Anc_8.628	YOR211C	MGM1	Mitochondrial GTPase, present in complex with Ugo1p and Fzo1p; required for mitochondrial morphology, fusion, and genome maintenance; exists as long and short form with different distributions; ratio of long to short forms is regulated by Psd1p; homolog of human OPA1 involved in autosomal dominant optic atrophy			mito	33	230	64	202	53.052	234.271		143.662	5.62666	2.1427
CAGL0E05368g		1371	277829	ChrE	523128	524498	W	CAGL-IPF5033|CAGL-CDS2344.1|CAG58841.1		CAL0128950	MRS2	YOR334W	YOR334W	Anc_7.062	YOR334W	MRS2	Mitochondrial inner membrane Mg(2+) channel; required for maintenance of intramitochondrial Mg(2+) concentrations at the correct level to support splicing of group II introns			mito	113	551	157	619	144.714	638.925		391.819	8.62073	2.14245
CAGL0F06567g		1518	421009	ChrF	646495	648012	W	CAGL-IPF463|CAGL-CDS2047.1|CAG59177.1		CAL0131320	AEP1	YMR064W	YMR064W	Anc_2.631	YMR064W	AEP1	Protein required for expression of the mitochondrial OLI1 gene; mitochondrial OLI1 gene encodes subunit 9 of F1-F0 ATP synthase			mito	52	247	41	162	49.7755	219.351		134.563	5.44874	2.13973
CAGL0L07392g		1188	-168924	ChrL	817664	818851	W	CAGL-IPF8875|CAGL-CDS2799.1|CAG62069.1		CAL0135196	QRI7	YDL104C	YDL104C	Anc_2.343	YDL104C	QRI7	Highly conserved mitochondrial protein; essential for t6A modification of mitochondrial tRNAs that decode ANN codons; similar to Kae1p and E. coli YgjD, both of which are also required for tRNA t6A modification			mito	47	185	31	153	41.7205	183.082		112.401	4.98446	2.13366
CAGL0A01760g		1818	96211	ChrA	174425	172608	C	CAGL-IPF3013|CAGL-CDS1474.1|CAG57735.1		CAL0126669	YDR341C	YHR091C	YHR091C	Anc_5.393	YHR091C	MSR1	Mitochondrial arginyl-tRNA synthetase; mutations in human ortholog are associated with pontocerebellar hypoplasia type 6; MSR1 has a paralog, YDR341C, that arose from the whole genome duplication	dup		mito	245	1554	408	1273	350.144	1523.34		936.743	11.4527	2.12122
CAGL0E04928g		1218	231834	ChrE	477209	478426	W	CAGL-IPF4993|CAGL-CDS2735.1|CAG58821.1		CAL0128718	MRF1	YGL143C	YGL143C	Anc_2.331	YGL143C	MRF1	Mitochondrial translation release factor; involved in stop codon recognition and hydrolysis of the peptidyl-tRNA bond during mitochondrial translation; lack of MRF1 causes mitochondrial genome instability			mito	79	563	194	617	148.267	643.754		396.01	8.55811	2.11831
CAGL0K10956g		204	813085	ChrK	1070906	1070703	C	CAGL-IPF3261|CAGL-CDS5758.1|CAG61655.1		CAL0133865		YML129C	YML129C	Anc_8.868	YML129C	COX14	Mitochondrial membrane protein; involved in translational regulation of Cox1p and assembly of cytochrome c oxidase (complex IV); associates with complex IV assembly intermediates and complex III/complex IV supercomplexes			mito	530	2059	475	2166	529.862	2298.69		1414.28	12.7953	2.11712
CAGL0L10824g		534	174306	ChrL	1161754	1161221	C	CAGL-IPF4193|CAGL-CDS4615.1|CAG62212.1		CAL0135750	IMG1	YCR046C	YCR046C	Anc_6.315	YCR046C	IMG1	Mitochondrial ribosomal protein of the large subunit; required for respiration and for maintenance of the mitochondrial genome			mito	197	906	230	875	227.265	966.312		596.789	9.77472	2.08811
CAGL0M03069g		1647	-701202	ChrM	349230	347584	C	CAGL-IPF6567|CAGL-CDS1781.1|CAG62456.1		CAL0137107	AEP2	YMR282C	YMR282C	Anc_8.847	YMR282C	AEP2	Mitochondrial protein; likely involved in translation of the mitochondrial OLI1 mRNA; exhibits genetic interaction with the OLI1 mRNA 5'-untranslated leader			mito	29	206	52	144	44.386	188.312		116.349	4.9528	2.08495
CAGL0G07205g		964	624567	ChrG	684868	685831	W	CAGL-IPF7086|CAGL-CDS4209.1|CAG59601.1		CAL0137627	YML6	YML025C	YML025C	Anc_5.565	YML025C	YML6	Mitochondrial ribosomal protein of the large subunit; has similarity to E. coli L4 ribosomal protein and human mitoribosomal MRP-L4 protein; essential for viability, unlike most other mitoribosomal proteins			mito	55	216	56	244	59.608	251.862		155.735	5.66798	2.07906
CAGL0C04807g		825	28450	ChrC	450190	451014	W	CAGL-IPF4127|CAGL-CDS3800.1|CAG58288.1		CAL0127616	RSM7	YJR113C	YJR113C	Anc_7.486	YJR113C	RSM7	Mitochondrial ribosomal protein of the small subunit; has similarity to E. coli S7 ribosomal protein			mito	145	733	210	742	190.155	801.941		496.048	9.11369	2.07632
CAGL0J06930g		1020	447403	ChrJ	664270	665289	W	CAGL-IPF2346|CAGL-CDS3241.1|CAG60958.1		CAL0132786	MRP51	YPL118W	YPL118W	Anc_8.613	YPL118W	MRP51	Mitochondrial ribosomal protein of the small subunit; MRP51 exhibits genetic interactions with mutations in the COX2 and COX3 mRNA 5'-untranslated leader sequences			mito	71	283	39	172	58.1645	243.206		150.685	5.54172	2.06397
CAGL0H08602g		1440	-111045	ChrH	844737	843298	C	CAGL-IPF135|CAGL-CDS2196.1|CAG60107.1		CAL0131614		YPR047W	YPR047W	Anc_3.328	YPR047W	MSF1	Mitochondrial phenylalanyl-tRNA synthetase; active as a monomer, unlike the cytoplasmic subunit which is active as a dimer complexed to a beta subunit dimer; similar to the alpha subunit of E. coli phenylalanyl-tRNA synthetase			mito	49	335	95	269	78.2725	326		202.136	6.31122	2.05829
CAGL0I09372g		312	108952	ChrI	901576	901887	W	CAGL-IPF15625|CAG60591.1		CAL0132520	MRPL37	YBR268W	YBR268W	Anc_1.318	YBR268W	MRPL37	Mitochondrial ribosomal protein of the large subunit			mito	32	309	91	214	67.5505	280.797		174.174	5.89758	2.05549
CAGL0M07249g		1194	-318970	ChrM	730042	731235	W	CAGL-IPF6214|CAGL-CDS2783.1|CAG62639.1		CAL0136217		YPL060W	YPL060W	Anc_8.522	YPL060W	MFM1	Mitochondrial inner membrane magnesium transporter; involved in maintenance of mitochondrial magnesium concentrations and membrane potential; indirectly affects splicing of group II introns; functionally and structurally related to Mrs2p			mito	20	107	24	79	24.332	100.755		62.5433	3.56175	2.04992
CAGL0J07832g		798	549611	ChrJ	766589	767386	W	CAGL-IPF2406|CAGL-CDS3871.1|CAG60999.1		CAL0133618	MRPL17	YNL252C	YNL252C	Anc_1.108	YNL252C	MRPL17	Mitochondrial ribosomal protein of the large subunit			mito	13	111	35	94	26.9425	111.537		69.2398	3.75461	2.04957
CAGL0H05775g		1389	-382919	ChrH	572838	571450	C	CAGL-IPF4405|CAGL-CDS2304.1|CAG59980.1		CAL0130313	MSY1	YPL097W	YPL097W	Anc_8.577	YPL097W	MSY1	Mitochondrial tyrosyl-tRNA synthetase			mito	42	327	100	266	77.55	320.243		198.897	6.22893	2.04597
CAGL0H02233g		897	-753351	ChrH	202160	201264	C	CAGL-IPF5864|CAGL-CDS3612.1|CAG59825.1		CAL0131892	PPA2	YMR267W	YMR267W	Anc_8.820	YMR267W	PPA2	Mitochondrial inorganic pyrophosphatase; required for mitochondrial function and possibly involved in energy generation from inorganic pyrophosphate			mito	30	108	18	89	25.999	107.109		66.5542	3.66583	2.04256
CAGL0A03949g		807	322317	ChrA	399220	400026	W	CAGL-IPF1187|CAGL-CDS3841.1|CAG57831.1		CAL0126651	COQ9	YLR201C	YLR201C	Anc_7.351	YLR201C	COQ9	Protein required for ubiquinone biosynthesis and respiratory growth; localizes to the matrix face of the mitochondrial inner membrane in a large complex with ubiquinone biosynthetic enzymes; ubiquinone is also known as coenzyme Q			mito	46	150	35	175	43.4425	178.463		110.953	4.7321	2.03844
CAGL0G09581g		1299	855381	ChrG	916813	915515	C	CAGL-IPF1547|CAGL-CDS2537.1|CAG59703.1		CAL0129815	TUF1	YOR187W	YOR187W	Anc_6.095	YOR187W	TUF1	Mitochondrial translation elongation factor Tu; comprises both GTPase and guanine nucleotide exchange factor activities, while these activities are found in separate proteins in S. pombe and humans			mito	126	750	235	721	194.542	798.146		496.344	8.9411	2.03657
CAGL0I08723g		1755	57412	ChrI	849315	851069	W	CAGL-IPF4373|CAGL-CDS1589.1|CAG60563.1		CAL0130382	MSM1	YGR171C	YGR171C	Anc_5.176	YGR171C	MSM1	Mitochondrial methionyl-tRNA synthetase (MetRS); functions as a monomer in mitochondrial protein synthesis; functions similarly to cytoplasmic MetRS although the cytoplasmic form contains a zinc-binding domain not found in Msm1p			mito	191	838	230	838	224.265	910.649		567.457	9.30233	2.02169
CAGL0I01804g		651	-642537	ChrI	150568	149918	C	CAGL-IPF2095|CAGL-CDS4288.1|CAG60266.1		CAL0132538	MRPL6	YHR147C	YHR147C	Anc_5.109	YHR147C	MRPL6	Mitochondrial ribosomal protein of the large subunit			mito	64	328	85	274	80.2175	325.427		202.822	6.2041	2.02035
CAGL0E03520g		681	79474	ChrE	325118	325798	W	CAGL-IPF2446|CAGL-CDS4195.1|CAG58759.1		CAL0128882	MRPL15	YLR312W-A	YLR312W-A	Anc_4.040	YLR312W-A	MRPL15	Mitochondrial ribosomal protein of the large subunit			mito	624	3051	873	2883	797.952	3214.5		2006.22	13.1999	2.01022
CAGL0L12320g		837	345505	ChrL	1332269	1333105	W	CAGL-IPF8615|CAGL-CDS3773.1|CAG62278.1		CAL0136046	GEP5	YLR091W	YLR091W	Anc_8.266	YLR091W	GEP5	Protein of unknown function; required for mitochondrial genome maintenance; detected in highly purified mitochondria in high-throughput studies; null mutant has decreased levels of cardiolipin and phosphatidylethanolamine			mito	391	1686	531	1919	491.471	1967.57		1229.52	11.6618	2.00124
CAGL0M05753g		1707	-437919	ChrM	612543	610837	C	CAGL-IPF9103|CAGL-CDS1673.1|CAG62572.1		CAL0136825	MRH4	YGL064C	YGL064C	Anc_6.223	YGL064C	MRH4	Mitochondrial ATP-dependent RNA helicase of the DEAD-box family; plays an essential role in mitochondrial function			mito	89	568	159	422	133.825	532.081		332.953	7.52237	1.9913
CAGL0H00506g	ATP2	1524	-904206	ChrH	51618	50095	C	CAGL-IPF7300|CAGL-CDS2034.1|CAG59751.1		CAL0131710	ATP2	YJR121W	YJR121W	Anc_7.507	YJR121W	ATP2	Beta subunit of the F1 sector of mitochondrial F1F0 ATP synthase; which is a large, evolutionarily conserved enzyme complex required for ATP synthesis; F1 translationally regulates ATP6 and ATP8 expression to achieve a balanced output of ATP synthase genes encoded in nucleus and mitochondria; phosphorylated			mito	158	736	154	491	165.547	656.481		411.014	8.14311	1.98751
CAGL0L08734g		366	-32888	ChrL	954476	954111	C	CAGL-IPF11663|CAGL-CDS5160.1|CAG62125.1		CAL0135276	MRPS16	YPL013C	YPL013C	Anc_8.079	YPL013C	MRPS16	Mitochondrial ribosomal protein of the small subunit			mito	178	891	303	964	258.317	1010.92		634.619	9.40682	1.96846
CAGL0H05907g		1980	-374629	ChrH	581423	579444	C	CAGL-IPF4399|CAGL-CDS1236.1|CAG59986.1		CAL0130350	MSD1	YPL104W	YPL104W	Anc_8.584	YPL104W	MSD1	Mitochondrial aspartyl-tRNA synthetase; required for acylation of aspartyl-tRNA; yeast and bacterial aspartyl-, asparaginyl-, and lysyl-tRNA synthetases contain regions with high sequence similarity, suggesting a common ancestral gene			mito	95	448	117	370	113.493	441.635		277.564	6.88042	1.96024
CAGL0F01529g		2274	-69064	ChrF	156044	158317	W	CAGL-IPF5769|CAGL-CDS0916.1|CAG58962.1		CAL0129234	MEF1	YLR069C	YLR069C	Anc_8.018	YLR069C	MEF1	Mitochondrial elongation factor involved in translational elongation			mito	93	595	195	514	155.822	599.447		377.635	7.7118	1.94373
CAGL0H05049g		2724	-469831	ChrH	486593	483870	C	CAGL-IPF4454|CAGL-CDS0591.1|CAG59948.1		CAL0131750	NAM2	YLR382C	YLR382C	Anc_4.236	YLR382C	NAM2	Mitochondrial leucyl-tRNA synthetase; also has a direct role in splicing of several mitochondrial group I introns; indirectly required for mitochondrial genome maintenance			mito	26	167	46	115	39.553	151.832		95.6927	4.18894	1.94062
CAGL0M00198g		735	-1022769	ChrM	27207	26473	C	CAGL-IPF5396|CAGL-CDS4054.1|CAG62329.1		CAL0136347	MGM101	YJR144W	YJR144W	Anc_4.380	YJR144W	MGM101	Protein with a role in mitochondrial DNA recombinational repair;also involved in interstrand cross-link repair; binds to and catalyzes the annealing of single-stranded mtDNA; oligomerizes to form rings and filaments; related to Rad52-type recombination proteins, with limited overall similarity but sharing conserved functionally important residues; component of the mitochondrial nucleoid, required…			mito	298	1332	441	1436	394.976	1507.78		951.377	10.4818	1.93259
CAGL0F06611g		2592	425500	ChrF	650449	653040	W	CAGL-IPF466|CAGL-CDS0661.1|CAG59179.1		CAL0131392	SOV1	YMR066W	YMR066W	Anc_2.637	YMR066W	SOV1	Mitochondrial protein of unknown function			mito	87	430	127	380	115.049	438.49		276.769	6.76731	1.9303
CAGL0K02717g		1194	-11212	ChrK	245911	247104	W	CAGL-IPF2237|CAGL-CDS2781.1|CAG61304.1		CAL0134429	MRP4	YHL004W	YHL004W	Anc_2.500	YHL004W	MRP4	Mitochondrial ribosomal protein of the small subunit			mito	677	2885	817	2679	793.343	3012.05		1902.7	12.4898	1.92473
CAGL0I06380g	RPM2	3591	-175041	ChrI	619534	615944	C	CAGL-IPF1420|CAGL-CDS0243.1|CAG60465.1		CAL0132228		YML091C	YML091C	Anc_8.865	YML091C	RPM2	Protein subunit of mitochondrial RNase P; has roles in nuclear transcription, cytoplasmic and mitochondrial RNA processing, and mitochondrial translation; distributed to mitochondria, cytoplasmic processing bodies, and the nucleus			mito	187	864	234	714	224.487	851.047		537.767	8.68317	1.92261
CAGL0F02695g		615	34049	ChrF	259987	260601	W	CAGL-IPF5698|CAGL-CDS4418.1|CAG59011.1		CAL0131248	MRP20	YDR405W	YDR405W	Anc_5.498	YDR405W	MRP20	Mitochondrial ribosomal protein of the large subunit			mito	271	1099	400	1375	358.7	1355.56		857.131	10.0848	1.91804
CAGL0M10329g		357	-15479	ChrM	1034308	1033952	C	CAGL-IPF8353|CAGL-CDS5205.1|CAG62774.1		CAL0136401	MRP17	YKL003C	YKL003C	Anc_2.508	YKL003C	MRP17	Mitochondrial ribosomal protein of the small subunit; MRP17 exhibits genetic interactions with PET122, encoding a COX3-specific translational activator			mito	340	1270	386	1393	385.423	1451.6		918.512	10.2695	1.91313
CAGL0J04224g		1569	179263	ChrJ	395856	397424	W	CAGL-IPF6843|CAGL-CDS1946.1|CAG60838.1		CAL0133678	MDJ1	YFL016C	YFL016C	Anc_8.061	YFL016C	MDJ1	Co-chaperone that stimulates HSP70 protein Ssc1p ATPase activity; involved in protein folding/refolding in the mitochodrial matrix; required for proteolysis of misfolded proteins; member of the HSP40 (DnaJ) family of chaperones			mito	60	265	51	151	59.3305	221.911		140.62	4.94774	1.90313
CAGL0E02959g		2493	35122	ChrE	279860	282352	W	CAGL-IPF9197|CAGL-CDS0736.1|CAG58737.1		CAL0128648	CCM1	YGR150C	YGR150C	Anc_4.087	YGR150C	CCM1	Mitochondrial 15S rRNA-binding protein; required for intron removal of COB and COX1 pre-mRNAs; has separable roles in stabilizing mitochondrial 15S rRNA and in maturation of the COB and COX1 mRNAs; contains pentatricopeptide repeat (PPR) motifs; mutant is respiratory deficient and has defective plasma membrane electron transport			mito	226	984	244	752	249.542	933.296		591.419	8.88114	1.90305
CAGL0B02167g		792	-249451	ChrB	201332	202123	W	CAGL-IPF5209|CAGL-CDS3891.1|CAG57964.1		CAL0127748	MRPL9	YGR220C	YGR220C	Anc_5.110	YGR220C	MRPL9	Mitochondrial ribosomal protein of the large subunit			mito	71	425	142	372	115.381	431.306		273.344	6.63495	1.90231
CAGL0G06820g		993	589389	ChrG	650668	649676	C	CAGL-IPF3400|CAGL-CDS3320.1|CAG59584.1		CAL0129720	PET130	YJL023C	YJL023C	Anc_5.172	YJL023C	PET130	Protein required for respiratory growth; the authentic, non-tagged protein is detected in highly purified mitochondria in high-throughput studies			mito	24	166	58	145	45.219	168.898		107.058	4.33713	1.90115
CAGL0L08910g		1872	-12374	ChrL	973872	975743	W	CAGL-IPF7493|CAGL-CDS1384.1|CAG62133.1		CAL0135324	AEP3	YPL005W	YPL005W	Anc_8.084	YPL005W	AEP3	Peripheral mitochondrial inner membrane protein; may facilitate use of unformylated tRNA-Met in mitochondrial translation initiation; stabilizes the bicistronic AAP1-ATP6 mRNA			mito	367	1755	420	1157	417.81	1555.92		986.867	10.3981	1.89685		0
CAGL0I05104g		1659	-312904	ChrI	480705	479047	C	CAGL-IPF1329|CAGL-CDS1751.1|CAG60409.1		CAL0132330	AIM10	YER087W	YER087W	Anc_7.368	YER087W	AIM10	Protein with similarity to tRNA synthetases; non-tagged protein is detected in purified mitochondria; null mutant is viable and displays elevated frequency of mitochondrial genome loss			mito	101	475	118	335	117.049	434.643		275.846	6.6264	1.89272
CAGL0K01419g		1263	-132037	ChrK	126314	125052	C	CAGL-IPF5098|CAGL-CDS2635.1|CAG61247.1		CAL0134091	MTF2	YDL044C	YDL044C	Anc_3.147	YDL044C	MTF2	Mitochondrial protein that interacts with mitochondrial RNA polymerase; interacts with an N-terminal region of mitochondrial RNA polymerase (Rpo41p) and couples RNA processing and translation to transcription			mito	189	664	149	556	178.269	658.538		418.404	7.77568	1.88521
CAGL0B04741g	PGS1	1521	5056	ChrB	456995	455475	C	CAGL-IPF668|CAGL-CDS2039.1|CAG58076.1		CAL0127096		YCL004W	YCL004W	Anc_1.415	YCL004W	PGS1	Phosphatidylglycerolphosphate synthase; catalyzes the synthesis of phosphatidylglycerolphosphate from CDP-diacylglycerol and sn-glycerol 3-phosphate in the first committed and rate-limiting step of cardiolipin biosynthesis			mito	1886	7461	1349	4135	1693.37	6152.54		3922.96	13.9019	1.86129			3
CAGL0A01980g		2028	132019	ChrA	210338	208311	C	CAGL-IPF2993|CAGL-CDS1173.1|CAG57744.1		CAL0126675	IFM1	YOL023W	YOL023W	Anc_1.364	YOL023W	IFM1	Mitochondrial translation initiation factor 2			mito	215	1082	310	816	280.705	1019.77		650.236	8.96583	1.86111
CAGL0M10593g		678	14625	ChrM	1064572	1063895	C	CAGL-IPF9481|CAGL-CDS4213.1|CAG62785.1		CAL0136521	ATP23	YNR020C	YNR020C	Anc_6.318	YNR020C	ATP23	Putative metalloprotease of the mitochondrial inner membrane; required for processing of Atp6p; has an additional role in assembly of the F0 sector of the F1F0 ATP synthase complex; substrate of the Mia40p-Erv1p disulfide relay system, and folding is assisted by Mia40p			mito	186	831	168	449	187.324	679.389		433.357	7.76718	1.8587
CAGL0B01793g		375	-286017	ChrB	164975	165349	W	CAGL-IPF5240|CAGL-CDS5123.1|CAG57947.2		CAL0127674	MRX14	YDR115W	YDR115W	Anc_8.267	YDR115W		Putative mitochondrial ribosomal protein of the large subunit; similar to E. coli L34 ribosomal protein; required for respiratory growth, as are most mitochondrial ribosomal proteins; protein increases in abundance and relocalizes to the plasma membrane upon DNA replication stress			mito	29	109	27	92	30.4985	109.366		69.9322	3.39242	1.84235
CAGL0K06545g		1539	385007	ChrK	643496	641958	C	CAGL-IPF5305|CAGL-CDS2001.1|CAG61469.1		CAL0134539	UGO1	YDR470C	YDR470C	Anc_5.595	YDR470C	UGO1	Outer membrane component of the mitochondrial fusion machinery; binds directly to Fzo1p and Mgm1p and thus links these two GTPases during mitochondrial fusion; involved in fusion of both the outer and inner membranes; facilitates dimerization of Fzo1p during fusion; import into the outer membrane is mediated by Tom70p and Mim1p; has similarity to carrier proteins but is not likely to function as …			mito	38	95	15	89	28.3325	100.609		64.471	3.22733	1.82824
CAGL0L03652g		2424	-566096	ChrL	422297	419874	C	CAGL-IPF2696|CAGL-CDS0790.1|CAG61902.1		CAL0135510	MEF2	YJL102W	YJL102W	Anc_1.264	YJL102W	MEF2	Mitochondrial elongation factor involved in translational elongation			mito	143	730	234	601	202.487	717.886		460.186	7.8005	1.82592
CAGL0C02651g		822	-151177	ChrC	271385	270564	C	CAGL-IPF1028|CAGL-CDS3807.1|CAG58198.1		CAL0127364	ATP10	YLR393W	YLR393W	Anc_4.253	YLR393W	ATP10	Assembly factor for the F0 sector of mitochondrial F1F0 ATP synthase; mitochondrial inner membrane protein; interacts genetically with ATP6			mito	153	769	210	517	194.155	688.204		441.179	7.67956	1.82563
CAGL0I10989g		1176	291536	ChrI	1084903	1083728	C	CAGL-IPF6394|CAGL-CDS2868.1|CAG60662.1		CAL0132542	MRM1	YOR201C	YOR201C	Anc_8.611	YOR201C	MRM1	Ribose methyltransferase; modifies a functionally critical, conserved nucleotide in mitochondrial 21S rRNA			mito	899	3596	967	2828	987.668	3454.79		2221.23	12.1266	1.8065
CAGL0J03498g		372	119193	ChrJ	336384	336755	W	CAGL-IPF6900|CAGL-CDS5143.1|CAG60805.1		CAL0129709	IMG2	YCR071C	YCR071C	Anc_6.339	YCR071C	IMG2	Mitochondrial ribosomal protein of the large subunit; conserved in metazoa, with similarity to human mitochondrial ribosomal protein MRPL49			mito	92	362	133	405	120.882	419.127		270.005	6.22471	1.7938
CAGL0L03542g		468	-579112	ChrL	408303	407836	C	CAGL-IPF2709|CAGL-CDS4775.1|CAG61897.1		CAL0136084	MRPL49	YJL096W	YJL096W	Anc_1.270	YJL096W	MRPL49	Mitochondrial ribosomal protein of the large subunit			mito	52	184	44	145	51.442	177.898		114.67	4.22242	1.79003
CAGL0E04400g		1356	177496	ChrE	422802	424157	W	CAGL-IPF2510|CAGL-CDS2386.1|CAG58798.1		CAL0128870	DIA4	YHR011W	YHR011W	Anc_5.598	YHR011W	DIA4	Probable mitochondrial seryl-tRNA synthetase; mutant displays increased invasive and pseudohyphal growth			mito	93	462	159	398	135.825	465.029		300.427	6.43708	1.77558
CAGL0I08481g		345	38335	ChrI	831287	830943	C	CAGL-IPF4352|CAGL-CDS5260.1|CAG60554.1		CAL0132326	MRP2	YPR166C	YPR166C	Anc_7.522	YPR166C	MRP2	Mitochondrial ribosomal protein of the small subunit			mito	64	230	107	340	92.4385	315.07		203.754	5.44355	1.76911
CAGL0J06710g		867	427587	ChrJ	644531	645397	W	CAGL-IPF2331|CAGL-CDS3697.1|CAG60948.1		CAL0133458	COQ5	YML110C	YML110C	Anc_8.833	YML110C	COQ5	2-hexaprenyl-6-methoxy-1,4-benzoquinone methyltransferase; involved in ubiquinone (Coenzyme Q) biosynthesis; localizes to the matrix face of the mitochondrial inner membrane in a large complex with other ubiquinone biosynthetic enzymes			mito	164	648	149	406	165.769	562.713		364.241	6.89897	1.76322
CAGL0I09548g		1329	120468	ChrI	912584	913912	W	CAGL-IPF7737|CAGL-CDS2543.1|CAG60599.1		CAL0132296	RSM23	YGL129C	YGL129C	Anc_6.227	YGL129C	RSM23	Mitochondrial ribosomal protein of the small subunit; has similarity to mammalian apoptosis mediator proteins; null mutation prevents induction of apoptosis by overproduction of metacaspase Mca1p			mito	87	445	193	493	151.712	512.151		331.931	6.62256	1.75524
CAGL0M07183g		1758	-324114	ChrM	724616	726373	W	CAGL-IPF6209|CAGL-CDS1582.1|CAG62636.1		CAL0136337	MDM31	YHR194W	YHR194W	Anc_4.359	YHR194W	MDM31	Mitochondrial protein that may have a role in phospholipid metabolism; inner membrane protein with similarity to Mdm32p; required for normal mitochondrial morphology and inheritance; interacts genetically with MMM1, MMM2, MDM10, MDM12, and MDM34			mito	128	632	161	347	154.435	520.168		337.302	6.65228	1.75197		0
CAGL0C04697g		813	20022	ChrC	441768	442580	W	CAGL-IPF872|CAGL-CDS3832.1|CAG58283.1		CAL0127180	RSM26	YJR101W	YJR101W	Anc_7.473	YJR101W	RSM26	Mitochondrial ribosomal protein of the small subunit			mito	477	1809	696	2054	626.128	2108.12		1367.12	10.4938	1.75143
CAGL0M08624g		1140	-189243	ChrM	860935	859796	C	CAGL-IPF11721|CAGL-CDS3264.1|CAG62696.1		CAL0136233	MSW1	YDR268W	YDR268W	Anc_5.633	YDR268W	MSW1	Mitochondrial tryptophanyl-tRNA synthetase			mito	765	2781	1049	3166	966.22	3245.19		2105.71	11.5995	1.74788
CAGL0D03542g		1389	-194345	ChrD	360937	359549	C	CAGL-IPF4743|CAGL-CDS2305.1|CAG58480.1		CAL0128145	MST1	YKL194C	YKL194C	Anc_4.299	YKL194C	MST1	Mitochondrial threonyl-tRNA synthetase; aminoacylates both the canonical threonine tRNA tT(UGU)Q1 and the unusual threonine tRNA tT(UAG)Q2 in vitro			mito	74	284	99	289	92.9945	312.21		202.602	5.36306	1.7473
CAGL0M04455g		2136	-559493	ChrM	491183	489048	C	CAGL-IPF8304|CAGL-CDS1056.1|CAG62517.1		CAL0137217	SLS1	YLR139C	YLR139C	Anc_8.346	YLR139C	SLS1	Mitochondrial membrane protein; coordinates expression of mitochondrially-encoded genes; may facilitate delivery of mRNA to membrane-bound translation machinery			mito	27	160	72	174	54.496	182.877		118.687	4.18918	1.74665
CAGL0I07623g		2136	-57946	ChrI	735901	733766	C	CAGL-IPF4277|CAGL-CDS1054.1|CAG60517.1		CAL0132176	HMI1	YOL095C	YOL095C	Anc_3.101	YOL095C	HMI1	Mitochondrial inner membrane localized ATP-dependent DNA helicase; required for the maintenance of the mitochondrial genome; not required for mitochondrial transcription; has homology to E. coli helicase uvrD			mito	199	540	127	509	171.048	569.019		370.034	6.8264	1.73407
CAGL0F08239g		1434	595579	ChrF	821107	822540	W	CAGL-IPF602|CAGL-CDS2212.1|CAG59251.1		CAL0131224		YGR255C	YGR255C	Anc_1.103	YGR255C	COQ6	Putative flavin-dependent monooxygenase; involved in ubiquinone (Coenzyme Q) biosynthesis; localizes to the matrix face of the mitochondrial inner membrane in a large complex with other ubiquinone biosynthetic enzymes; human COX6 can rescue a yeast cox6 mutant and is implicated in steroid-resistant nephrotic syndrome (SRNS)			mito	203	752	178	496	201.379	667.408		434.394	7.23013	1.72866
CAGL0J01221g		1056	-101371	ChrJ	115478	116533	W	CAGL-IPF7878|CAGL-CDS3148.1|CAG60711.1		CAL0129669	MTG1	YMR097C	YMR097C	Anc_2.463	YMR097C	MTG1	Putative GTPase peripheral to the mitochondrial inner membrane; essential for respiratory competence, likely functions in assembly of the large ribosomal subunit, has homologs in plants and animals			mito	57	263	99	248	84.4945	277.704		181.099	5.01261	1.71662
CAGL0F07469g		1851	500402	ChrF	727572	725722	C	CAGL-IPF535|CAGL-CDS1421.1|CAG59216.1		CAL0131290	RMD9	YGL107C	YGL107C	Anc_6.150	YGL107C	RMD9	Mitochondrial protein required for respiratory growth; mutant phenotype and genetic interactions suggest a role in delivering mt mRNAs to ribosomes; located on matrix face of the inner membrane and loosely associated with mitoribosomes; RMD9 has a paralog, YBR238C, that arose from the whole genome duplication	dup		mito	63	241	87	240	80.8285	262.02		171.424	4.83331	1.69674
CAGL0G02277g		630	140927	ChrG	202024	201395	C	CAGL-IPF3550|CAGL-CDS4371.1|CAG59388.1		CAL0129433	MRPL20	YKR085C	YKR085C	Anc_5.682	YKR085C	MRPL20	Mitochondrial ribosomal protein of the large subunit			mito	93	238	44	189	71.942	230.66		151.301	4.52162	1.68086
CAGL0L09713g	ATP7	531	58691	ChrL	1045608	1046138	W	CAGL-IPF8759|CAGL-CDS4632.1|CAG62164.1		CAL0135032	ATP7	YKL016C	YKL016C	Anc_2.655	YKL016C	ATP7	Subunit d of the stator stalk of mitochondrial F1F0 ATP synthase; F1F0 ATP synthase is a large, evolutionarily conserved enzyme complex required for ATP synthesis			mito	235	876	252	658	258.486	824.259		541.372	7.57354	1.67301
CAGL0J01199g		1872	-103056	ChrJ	113385	115256	W	CAGL-IPF7880|CAGL-CDS1385.1|CAG60710.1		CAL0133312	ATP25	YMR098C	YMR098C	Anc_2.461	YMR098C	ATP25	Mitochondrial protein required for the stability of Oli1p (Atp9p) mRNA; also required for the Oli1p ring formation; YMR098C is not an essential gene			mito	337	1312	403	1016	393.366	1251.87		822.617	8.67196	1.67014
CAGL0D05412g		969	-37803	ChrD	517269	516301	C	CAGL-IPF4923|CAGL-CDS3396.1|CAG58555.1		CAL0128195	MRPS5	YBR251W	YBR251W	Anc_7.170	YBR251W	MRPS5	Mitochondrial ribosomal protein of the small subunit			mito	290	1062	420	1149	379.31	1204.74		792.025	8.55634	1.66727
CAGL0H09416g		2253	-32366	ChrH	921571	923823	W	CAGL-IPF74|CAGL-CDS1022.1|CAG60141.1		CAL0131930	AFG3	YER017C	YER017C	Anc_7.168	YER017C	AFG3	Component, with Yta12p, of mitochondrial inner membrane m-AAA protease; mediates degradation of misfolded or unassembled proteins and is also required for correct assembly of mitochondrial enzyme complexes; involved in cytoplasmic mRNA translation and aging			mito	341	1206	385	1031	385.368	1207.65		796.509	8.47174	1.6479
CAGL0H07029g		1071	-257724	ChrH	697874	696804	C	CAGL-IPF256|CAGL-CDS3111.1|CAG60035.1		CAL0131616	MRPL35	YDR322W	YDR322W	Anc_5.360	YDR322W	MRPL35	Mitochondrial ribosomal protein of the large subunit			mito	131	398	145	439	147.048	457.035		302.041	5.94402	1.63602
CAGL0J11858g	RML2	1116	941820	ChrJ	1158639	1159754	W	CAGL-IPF2937|CAGL-CDS2972.1|CAG61180.1		CAL0133430	RML2	YEL050C	YEL050C	Anc_5.516	YEL050C	RML2	Mitochondrial ribosomal protein of the large subunit (L2); has similarity to E. coli L2 ribosomal protein; mutant allele (fat21) causes inability to utilize oleate, and induce oleic acid oxidation; may interfere with activity of the Adr1p transcription factor			mito	127	388	148	444	146.714	454.962		300.838	5.92253	1.63274
CAGL0I07601g		900	-59739	ChrI	733490	732591	C	CAGL-IPF4276|CAGL-CDS3605.1|CAG60516.1		CAL0132450	COQ3	YOL096C	YOL096C	Anc_3.099	YOL096C	COQ3	O-methyltransferase; catalyzes two different O-methylation steps in ubiquinone (Coenzyme Q) biosynthesis; component of a mitochondrial ubiquinone-synthesizing complex; phosphoprotein			mito	614	2028	540	1366	607.97	1814.79		1211.38	9.15735	1.57773
CAGL0J11330g		450	885543	ChrJ	1102695	1103144	W	CAGL-IPF2896|CAGL-CDS4838.1|CAG61156.1		CAL0133246	MRPL19	YNL185C	YNL185C	Anc_2.070	YNL185C	MRPL19	Mitochondrial ribosomal protein of the large subunit			mito	51	162	54	136	56.497	161.628		109.062	3.49095	1.51643
CAGL0F05577g		2001	334460	ChrF	559705	561705	W	CAGL-IPF398|CAGL-CDS0958.1|CAG59137.1		CAL0129558	MSS116	YDR194C	YDR194C	Anc_8.402	YDR194C	MSS116	DEAD-box protein; required for efficient splicing of mitochondrial Group I and II introns; non-polar RNA helicase that also facilities strand annealing			mito	235	664	220	604	240.71	686.642		463.676	6.4783	1.51226
CAGL0M07051g		2772	-331448	ChrM	719546	716775	C	CAGL-IPF6198|CAGL-CDS0563.1|CAG62630.1		CAL0136319		YMR287C	YMR287C	Anc_8.853	YMR287C	DSS1	3'-5' exoribonuclease; component of the mitochondrial degradosome along with the ATP-dependent RNA helicase Suv3p; the degradosome associates with the ribosome and mediates turnover of aberrant or unprocessed RNAs			mito	245	754	300	756	290.15	820.638		555.394	6.85067	1.49995
CAGL0F03663g		888	130661	ChrF	356462	357349	W	CAGL-IPF1741|CAGL-CDS3639.1|CAG59053.1		CAL0129487	MRPL40	YPL173W	YPL173W	Anc_8.706	YPL173W	MRPL40	Mitochondrial ribosomal protein of the large subunit			mito	51	190	60	125	59.83	169.188		114.509	3.53513	1.49968
CAGL0I00374g		558	-764904	ChrI	28154	27597	C	CAGL-IPF1999|CAGL-CDS4556.1|CAG60206.1		CAL0130089	GEP7	YGL057C	YGL057C	Anc_6.108	YGL057C	GEP7	Protein of unknown function; null mutant exhibits a respiratory growth defect and synthetic interactions with prohibitin (phb1) and gem1; authentic, non-tagged protein is detected in highly purified mitochondria in high-throughput studies			mito	611	2053	576	1258	626.468	1764.06		1195.26	8.63773	1.49359
CAGL0L12386g	SUV3	2175	352463	ChrL	1340732	1338558	C	CAGL-IPF8609|CAGL-CDS1015.1|CAG62281.1		CAL0135476	SUV3	YPL029W	YPL029W	Anc_8.480	YPL029W	SUV3	ATP-dependent RNA helicase; component of the mitochondrial degradosome along with the RNase Dss1p; the degradosome associates with the ribosome and mediates RNA turnover; also required during splicing of the COX1 AI5_beta intron			mito	277	852	326	803	320.593	897.157		608.875	6.99693	1.48462			4
CAGL0J01353g		2484	-91141	ChrJ	124994	127477	W	CAGL-IPF7865|CAGL-CDS0744.1|CAG60717.1		CAL0129619	YTA12	YMR089C	YMR089C	Anc_2.472	YMR089C	YTA12	Component, with Afg3p, of mitochondrial inner membrane m-AAA protease; mediates degradation of misfolded or unassembled proteins; also required for correct assembly of mitochondrial enzyme complexes			mito	954	2815	965	2370	1014.06	2796.14		1905.1	9.49821	1.46329
CAGL0J11198g		927	874142	ChrJ	1091056	1091982	W	CAGL-IPF2884|CAGL-CDS3536.1|CAG61150.1		CAL0133574	MRPL22	YNL177C	YNL177C	Anc_2.078	YNL177C	MRPL22	Mitochondrial ribosomal protein of the large subunit			mito	108	359	141	310	133.326	362.005		247.665	4.82314	1.44106
CAGL0J04422g		3081	200678	ChrJ	416515	419595	W	CAGL-IPF7057|CAGL-CDS0410.1|CAG60847.1		CAL0132864	PIM1	YBL022C	YBL022C	Anc_8.168	YBL022C	PIM1	ATP-dependent Lon protease; involved in degradation of misfolded proteins in mitochondria; required for biogenesis and maintenance of mitochondria			mito	369	993	350	885	379.925	1015.67		697.796	6.99378	1.41864
CAGL0G03861g		933	305575	ChrG	365892	366824	W	CAGL-IPF7121|CAGL-CDS3517.1|CAG59457.1		CAL0130737		YGR046W	YGR046W	Anc_1.086	YGR046W	TAM41	Mitochondrial phosphatidate cytidylyltransferase (CDP-DAG synthase); required for cardiolipin biosynthesis; viability of null mutant is strain-dependent; mRNA is targeted to the bud; mutant displays defect in mitochondrial protein import, likely due to altered membrane lipid composition			mito	195	524	172	436	194.046	518.278		356.162	5.49753	1.41733
CAGL0I03784g		813	-467098	ChrI	326088	325276	C	CAGL-IPF7390|CAGL-CDS3831.1|CAG60350.1		CAL0132524	CRD1	YDL142C	YDL142C	Anc_7.316	YDL142C	CRD1	Cardiolipin synthase; produces cardiolipin, which is a phospholipid of the mitochondrial inner membrane that is required for normal mitochondrial membrane potential and function; also required for normal vacuolar ion homeostasis			mito	183	553	158	342	180.269	477.741		329.005	5.28658	1.40608
CAGL0F01573g		2859	-65131	ChrF	159685	162543	W	CAGL-IPF5765|CAGL-CDS0508.1|CAG58964.1		CAL0130962	PET309	YLR067C	YLR067C	Anc_8.020	YLR067C	PET309	Specific translational activator for the COX1 mRNA; also influences stability of intron-containing COX1 primary transcripts; localizes to the mitochondrial inner membrane; contains seven pentatricopeptide repeats (PPRs)			mito	590	1637	534	1270	592.637	1563.09		1077.86	7.86484	1.39918
CAGL0D03102g		357	-234069	ChrD	320697	320341	C	CAGL-IPF9418|CAGL-CDS5206.1|CAG58462.1		CAL0128271	COX16	YJL003W	YJL003W	Anc_5.212	YJL003W	COX16	Mitochondrial inner membrane protein; required for assembly of cytochrome c oxidase			mito	133	362	138	326	144.159	372.873		258.516	4.67223	1.37102
CAGL0A02475g		1722	187707	ChrA	265873	264152	C	CAGL-IPF2951|CAGL-CDS1648.1|CAG57764.1		CAL0126967	ATP22	YDR350C	YDR350C	Anc_5.405	YDR350C	ATP22	Specific translational activator for the mitochondrial ATP6 mRNA; Atp6p encodes a subunit of F1F0 ATP synthase; localized to the mitochondrial inner membrane			mito	775	2106	852	1969	861.786	2206.85		1534.32	8.36741	1.35659
CAGL0M00858g	MRPL4	948	-953709	ChrM	96373	95426	C	CAGL-IPF5454|CAGL-CDS3457.1|CAG62359.1		CAL0136215	MRPL4	YLR439W	YLR439W	Anc_4.320	YLR439W	MRPL4	Mitochondrial ribosomal protein of the large subunit; homolog of prokaryotic L29 ribosomal protein; located at the ribosomal tunnel exit			mito	131	308	103	276	123.716	316.598		220.157	4.31444	1.35561			3
CAGL0K04521g		954	173450	ChrK	431646	430693	C	CAGL-IPF4038|CAGL-CDS3436.1|CAG61383.1		CAL0134135	COX18	YGR062C	YGR062C	Anc_4.209	YGR062C	COX18	Protein required for membrane insertion of C-terminus of Cox2p; mitochondrial integral inner membrane protein; interacts genetically and physically with Mss2p and Pnt1p; similar to S. cerevisiae Oxa1, N. crassa Oxa2p, and E. coli YidC			mito	351	675	266	760	324.263	783.48		553.871	5.8074	1.27273
CAGL0J05258g		735	290839	ChrJ	507849	508583	W	CAGL-IPF7913|CAGL-CDS4056.1|CAG60884.1		CAL0129447	MRPL8	YJL063C	YJL063C	Anc_1.313	YJL063C	MRPL8	Mitochondrial ribosomal protein of the large subunit			mito	104	223	98	234	107.439	249.507		178.473	3.52626	1.21556
CAGL0J03850g	MGE1	696	150024	ChrJ	367053	367748	W	CAGL-IPF6872|CAGL-CDS4154.1|CAG60821.1		CAL0132866	MGE1	YOR232W	YOR232W	Anc_8.653	YOR232W	MGE1	Mitochondrial matrix cochaperone; nucleotide release factor for Ssc1p in protein translocation and folding; also acts as cochaperone for Ssq1p in folding of Fe-S cluster proteins; acts as oxidative sensor to regulate mitochondrial Ssc1p; in presence of oxidative stress, dimeric Mge1p becomes a monomer and unable to regulate Ssc1p function; homolog of E. coli GrpE and human Mge1 (GRPEL1), which al…			mito	159	347	88	213	129.384	299.212		214.298	3.80464	1.20951
CAGL0K10912g		804	810217	ChrK	1068338	1067535	C	CAGL-IPF3257|CAGL-CDS3846.1|CAG61653.1		CAL0134505	MRPL24	YMR193W	YMR193W	Anc_6.282	YMR193W	MRPL24	Mitochondrial ribosomal protein of the large subunit; two mitochondrial ribosomal proteins, YmL14 and YmL24, have been assigned to the same gene			mito	175	434	186	374	191.823	436.977		314.4	4.38572	1.18778
CAGL0G01881g		423	108370	ChrG	169364	168942	C	CAGL-IPF15256|CAG59370.1		CAL0137637	MRPL51	YPR100W	YPR100W	Anc_3.412	YPR100W	MRPL51	Mitochondrial ribosomal protein of the large subunit			mito	112	212	82	213	102.551	231.712		167.131	3.3115	1.17599
CAGL0K04829g		624	212576	ChrK	469984	470607	W	CAGL-IPF4015|CAGL-CDS4387.1|CAG61397.1		CAL0133849	RRG9	YNL213C	YNL213C	Anc_2.034	YNL213C	RRG9	Protein of unknown function; null mutant lacks mitochondrial DNA and cannot grow on glycerol; the authentic, non-tagged protein is detected in highly purified mitochondria in high-throughput studies			mito	369	834	291	619	347.15	780.425		563.788	5.36549	1.1687
CAGL0F05423g		993	324907	ChrF	551648	550656	C	CAGL-IPF388|CAGL-CDS3321.1|CAG59130.1		CAL0129611	COQ4	YDR204W	YDR204W	Anc_8.411	YDR204W	COQ4	Protein with a role in ubiquinone (Coenzyme Q) biosynthesis; possibly functioning in stabilization of Coq7p; located on the matrix face of the mitochondrial inner membrane; component of a mitochondrial ubiquinone-synthesizing complex			mito	855	1819	700	1561	817.35	1824.47		1320.91	6.87949	1.15845
CAGL0J09724g		657	739069	ChrJ	956118	956774	W	CAGL-IPF9281|CAGL-CDS4271.1|CAG61083.1		CAL0133336	MRPL11	YDL202W	YDL202W	Anc_8.449	YDL202W	MRPL11	Mitochondrial ribosomal protein of the large subunit			mito	169	411	164	311	176.602	388.591		282.596	4.0231	1.13775
CAGL0G10131g		1095	910679	ChrG	970915	972009	W	CAGL-IPF1509|CAGL-CDS3028.1|CAG59728.1		CAL0130835	QCR2	YPR191W	YPR191W	Anc_7.548	YPR191W	QCR2	Subunit 2 of ubiquinol cytochrome-c reductase (Complex III); Complex III is a component of the mitochondrial inner membrane electron transport chain; phosphorylated; transcription is regulated by Hap1p, Hap2p/Hap3p, and heme			mito	314	791	325	595	338.538	744.872		541.705	5.15125	1.13768
CAGL0K06391g		441	370230	ChrK	627730	628170	W	CAGL-IPF5296|CAGL-CDS4874.1|CAG61462.1		CAL0134075	MRPL28	YDR462W	YDR462W	Anc_5.584	YDR462W	MRPL28	Mitochondrial ribosomal protein of the large subunit; protein abundance increases in response to DNA replication stress			mito	108	240	138	288	131.659	289.624		210.642	3.55102	1.13738
CAGL0D05632g		168	-17649	ChrD	537022	536855	C	CAGL-IPF15145|CAG58565.1		CAL0128225	COX17	YLL009C	YLL009C	Anc_5.205	YLL009C	COX17	Copper metallochaperone that transfers copper to Sco1p and Cox11p; eventual delivery to cytochrome c oxidase; contains twin cysteine-x9-cysteine motifs			mito	553	1281	500	945	555.25	1194.8		875.024	5.84922	1.10556
CAGL0D00726g		624	-461004	ChrD	93895	93272	C	CAGL-IPF2599|CAGL-CDS4384.1|CAG58356.1		CAL0128115	CBS1	YDL069C	YDL069C	Anc_4.260	YDL069C	CBS1	Mitochondrial translational activator of the COB mRNA; membrane protein that interacts with translating ribosomes, acts on the COB mRNA 5'-untranslated leader			mito	457	1118	451	729	480.03	986.83		733.43	5.20809	1.03967
CAGL0I06556g		831	-156260	ChrI	636105	636935	W	CAGL-IPF1434|CAGL-CDS3783.1|CAG60472.1		CAL0132100	PET122	YER153C	YER153C	Anc_8.205	YER153C	PET122	Mitochondrial translational activator specific for the COX3 mRNA; acts together with Pet54p and Pet494p; located in the mitochondrial inner membrane			mito	124	251	118	233	128.549	262.922		195.735	3.12069	1.03231
CAGL0L06160g		465	-285764	ChrL	701186	701650	W	CAGL-IPF4495|CAGL-CDS4789.1|CAG62013.1		CAL0135058	COX4	YGL187C	YGL187C	Anc_8.148	YGL187C	COX4	Subunit IV of cytochrome c oxidase; the terminal member of the mitochondrial inner membrane electron transport chain; precursor N-terminal 25 residues are cleaved during mitochondrial import; phosphorylated; spermidine enhances translation			mito	684	1286	550	1161	648.525	1323.77		986.145	5.64179	1.02941
CAGL0M07073g		591	-329585	ChrM	719729	720319	W	CAGL-IPF6199|CAGL-CDS4479.1|CAG62631.1		CAL0137387	PTH1	YHR189W	YHR189W	Anc_8.856	YHR189W	PTH1	One of two mitochondrially-localized peptidyl-tRNA hydrolases; dispensable for respiratory growth on rich medium, but required for respiratory growth on minimal medium; see also PTH2			mito	415	884	471	882	470.14	959.411		714.776	5.11261	1.02906
CAGL0D00748g		183	-459885	ChrD	94794	94612	C	CAG58357.1		CAL0128513	COX9	YDL067C	YDL067C	Anc_4.257	YDL067C	COX9	Subunit VIIa of cytochrome c oxidase (Complex IV); Complex IV is the terminal member of the mitochondrial inner membrane electron transport chain			mito	322	679	284	530	319.762	650.815		485.288	4.46496	1.02525
CAGL0D05962g		459	13685	ChrD	568044	568502	W	CAGL-IPF4877|CAGL-CDS4813.1|CAG58579.1		CAL0127943	CBP4	YGR174C	YGR174C	Anc_5.186	YGR174C	CBP4	Mitochondrial protein required for assembly of cytochrome bc1 complex; interacts with the Cbp3p-Cbp6p complex and newly synthesized cytochrome b (Cobp) to promote assembly of Cobp into the cytochrome bc1 complex			mito	1554	3311	1236	2255	1464.6	2976.8		2220.7	6.86851	1.02326
CAGL0D01144g		483	-420548	ChrD	133799	134281	W	CAGL-IPF2636|CAGL-CDS4731.1|CAG58375.1		CAL0128521	CBP6	YBR120C	YBR120C	Anc_3.380	YBR120C	CBP6	Mitochondrial protein required for translation of the COB mRNA; forms a complex with Cbp3p that binds to mt ribosomes near the polypeptide tunnel exit and promotes efficient translation of the COB mRNA; Cbp3p-Cbp6p complex also interacts with newly synthesized cytochrome b (Cobp) and Cbp4p to promote assembly of Cobp into the cytochrome bc1 complex; Cbp3p-Cbp6p complex is sequestered if assembly …			mito	400	782	312	625	374.316	757.938		566.127	4.67948	1.01782
CAGL0E05324g		3855	273406	ChrE	521317	517463	C	CAGL-IPF5028|CAGL-CDS0198.1|CAG58839.1		CAL0128678	MIP1	YOR330C	YOR330C	Anc_7.064	YOR330C	MIP1	Mitochondrial DNA polymerase; conserved C-terminal segment is required for the maintenance of mitochondrial genome; mutations in the human ortholog POLG are associated with Alpers-Huttenlocher syndrome (AHS) and other mitochondrial diseases; Mip1p is the single subunit of mitochondrial DNA polymerase in yeast, in contrast to metazoans in which there is a complex of a catalytic subunit and an acce…			mito	158	359	175	303	177.213	357.906		267.56	3.50581	1.0141
CAGL0E05830g		954	333330	ChrE	579790	578837	C	CAGL-IPF5067|CAGL-CDS3437.1|CAG58861.1		CAL0128874	CBP3	YPL215W	YPL215W	Anc_6.232	YPL215W	CBP3	Mitochondrial protein required for assembly of cytochrome bc1 complex; forms a complex with Cbp6p that binds to mt ribosomes near the polypeptide tunnel exit and promotes efficient translation of the COB mRNA; Cbp3p-Cbp6p complex also interacts with newly synthesized cytochrome b (Cobp) and Cbp4p to promote assembly of Cobp into the cytochrome bc1 complex; Cbp3p-Cbp6p complex is sequestered if as…			mito	1565	2949	1297	2637	1503.98	3019.46		2261.72	6.77546	1.0055
CAGL0C02563g		3852	-161112	ChrC	259114	262965	W	CAGL-IPF1037|CAGL-CDS0199.1|CAG58194.1		CAL0127486	SKI2	YLR398C	YLR398C	Anc_4.261	YLR398C	SKI2	Ski complex component and putative RNA helicase; mediates 3'-5' RNA degradation by the cytoplasmic exosome; null mutants have superkiller phenotype of increased viral dsRNAs and are synthetic lethal with mutations in 5'-3' mRNA decay; mutations in the human ortholog, SKIV2L, causes Syndromic diarrhea/Trichohepatoenteric (SD/THE) syndrome				694	3690	617	1615	690.744	2791.58		1741.16	12.8106	2.01486
CAGL0I07073g		1182	-111087	ChrI	682283	681102	C	CAGL-IPF1471|CAGL-CDS2803.1|CAG60494.1		CAL0132202	SKI8	YGL213C	YGL213C	Anc_3.526	YGL213C	SKI8	Ski complex component and WD-repeat protein; mediates 3'-5' RNA degradation by the cytoplasmic exosome; also required for meiotic double-strand break recombination; null mutants have superkiller phenotype				992	4171	955	2170	1027.5	3357.03		2192.27	11.4337	1.70805
CAGL0G10087g		4236	904158	ChrG	962823	967058	W	CAGL-IPF1512|CAGL-CDS0140.1|CAG59726.1		CAL0130697	SKI3	YPR189W	YPR189W	Anc_7.546	YPR189W	SKI3	Ski complex component and TPR protein; mediates 3'-5' RNA degradation by the cytoplasmic exosome; null mutants have superkiller phenotype of increased viral dsRNAs and are synthetic lethal with mutations in 5'-3' mRNA decay; mutations in the human ortholog, TTC37, causes Syndromic diarrhea/Trichohepatoenteric (SD/THE) syndrome				554	2233	486	1061	547.973	1738.72		1143.34	9.51819	1.66585
CAGL0F00957g	TPD3	1836	-122371	ChrF	102956	104791	W	CAGL-IPF3749|CAGL-CDS1444.1|CAG58939.1		CAL0131316			YAL016W	Anc_7.088	YAL016W	TPD3-A	Regulatory subunit A of the heterotrimeric PP2A complex; the heterotrimeric protein phosphatase 2A (PP2A) complex also contains regulatory subunit Cdc55p and either catalytic subunit Pph21p or Pph22p; required for cell morphogenesis and transcription by RNA polymerase III	dup			1453	3513	1395	3494	1502.42	3803.24		2652.83	9.3266	1.33994
CAGL0A01089g		1608	32507	ChrA	110616	109009	C	CAGL-IPF3375|CAGL-CDS1866.1|CAG57709.1		CAL0126673	PBI1	YPL272C	YPL272C	Anc_6.008	YPL272C	PBI1	Putative protein of unknown function; gene expression induced in response to ketoconazole; YPL272C is not an essential gene				972	2816	964	2294	1022.5	2752.14		1887.32	9.25239	1.42845
CAGL0H03377g	DBP3	1623	-640497	ChrH	315377	313755	C	CAGL-IPF1934|CAGL-CDS1837.1|CAG59873.1		CAL0131546	DBP3	YGL078C	YGL078C	Anc_6.204	YGL078C	DBP3	RNA-Dependent ATPase, member of DExD/H-box family; involved in cleavage of site A3 within the ITS1 spacer during rRNA processing; not essential for growth, but deletion causes severe slow-growth phenotype				84	474	39	189	64.6645	348.659		206.662	7.52614	2.43077			1
CAGL0M07315g		1089	-308596	ChrM	741557	740469	C	CAGL-IPF6221|CAGL-CDS3053.1|CAG62642.1		CAL0136283	SUR1	YPL057C	YPL057C	Anc_8.514	YPL057C	SUR1	Mannosylinositol phosphorylceramide (MIPC) synthase catalytic subunit; forms a complex with regulatory subunit Csg2p; function in sphingolipid biosynthesis is overlapping with that of Csh1p; SUR1 has a paralog, CSH1, that arose from the whole genome duplication	dup			1402	3342	1357	2224	1455.81	2974.15		2214.98	6.91436	1.03065
CAGL0I05170g	CST6	2106	-300768	ChrI	490959	493064	W	CAGL-IPF1334|CAGL-CDS1091.1|CAG60412.1|RCA1		CAL0132168	CST6	YIL036W	YIL036W	Anc_7.211	YIL036W	CST6	Basic leucine zipper (bZIP) transcription factor, in ATF/CREB family; mediates transcriptional activation of NCE103 (encoding carbonic anhydrase) in response to low CO2 levels such as in the ambient air; proposed to be a regulator of oleate responsive genes; involved in utilization of non-optimal carbon sources and chromosome stability; relocalizes to the cytosol in response to hypoxia; CST6 has …				545	1485	460	930	529.03	1288.01		908.522	6.86859	1.28373		0
CAGL0G01628g		1131	91044	ChrG	152392	151262	C	CAGL-IPF3840|CAGL-CDS2928.1|CAG59359.1		CAL0137639	YNL035C	YNL035C	YNL035C	Anc_2.283	YNL035C		Nuclear protein of unknown function; relocalizes to the cytosol in response to hypoxia; contains WD-40 domains; not an essential gene; protein abundance increases in response to DNA replication stress				481	1448	403	740	465.366	1158.27		811.818	6.80301	1.31553
CAGL0K03883g		615	104791	ChrK	362818	362204	C	CAGL-IPF2153|CAGL-CDS4414.1|CAG61355.1		CAL0134141	JLP2	YMR132C	YMR132C	Anc_2.400	YMR132C	JLP2	Protein of unknown function; contains sequence that closely resembles a J domain (typified by the E. coli DnaJ protein)				942	2448	826	1339	930.843	2008.98		1469.91	6.77316	1.10986
CAGL0J01067g		1141	-113043	ChrJ	104904	103764	C	CAGL-IPF7891|CAGL-CDS4098.1|CAG60705.2		CAL0132854	BET4	YJL031C	YJL031C	Anc_5.243	YJL031C	BET4	Alpha subunit of Type II geranylgeranyltransferase; required for vesicular transport between the endoplasmic reticulum and the Golgi; provides a membrane attachment moiety to Rab-like proteins Ypt1p and Sec4p				171	462	20	247	97.61	376.619		237.114	6.40053	1.948
CAGL0G08734g		576	768235	ChrG	829305	828730	C	CAGL-IPF1609|CAGL-CDS4509.1|CAG59669.1		CAL0129281		YNL067W	YNL067W	Anc_2.236	YNL067W	RPL9B	Ribosomal 60S subunit protein L9B; homologous to mammalian ribosomal protein L9 and bacterial L6; RPL9B has a paralog, RPL9A, that arose from a single-locus duplication				468	1310	519	865	523.304	1162.46		842.881	6.02343	1.15146
CAGL0L03047g		2148	-634076	ChrL	352032	354179	W	CAGL-IPF2745|CAGL-CDS1042.1|CAG61874.1		CAL0135220	DBP7	YKR024C	YKR024C	Anc_1.261	YKR024C	DBP7	Putative ATP-dependent RNA helicase of the DEAD-box family; involved in ribosomal biogenesis; essential for growth under anaerobic conditions				73	417	75	162	79.1625	304.351		191.757	5.81999	1.94285
CAGL0M10747g		1299	23582	ChrM	1073840	1072542	C	CAGL-IPF9490|CAGL-CDS2547.1|CAG62792.1		CAL0137391	YNR029C	YNR029C	YNR029C	Anc_6.337	YNR029C		Putative protein of unknown function; deletion confers reduced fitness in saline				256	719	226	501	254.543	653.836		454.189	5.7866	1.36102
CAGL0A01562g		468	80573	ChrA	157645	158112	W	CAGL-IPF3026|CAGL-CDS4776.1|CAG57726.1		CAL0126793	RPL24A	YGR148C	YGL031C	Anc_4.084	YGL031C	RPL24A	Ribosomal 60S subunit protein L24A; not essential for translation but may be required for normal translation rate; homologous to mammalian ribosomal protein L24, no bacterial homolog; RPL24A has a paralog, RPL24B, that arose from the whole genome duplication				145	509	121	305	140.716	434.077		287.397	5.78644	1.62517
CAGL0D00616g		1136	-475398	ChrD	78622	79757	W	CAGL-IPF40002|CAG58351.1		CAL0128133	RPL31A	YLR406C	YDL075W	Anc_4.270	YDL075W	RPL31A	Ribosomal 60S subunit protein L31A; associates with karyopherin Sxm1p; loss of both Rpl31p and Rpl39p confers lethality; homologous to mammalian ribosomal protein L31, no bacterial homolog; RPL31A has a paralog, RPL31B, that arose from the whole genome duplication				31	267	38	108	37.609	197.734		117.672	5.71904	2.39441
CAGL0J04796g		1800	239823	ChrJ	456300	458099	W	CAGL-IPF7036|CAGL-CDS1511.1|CAG60863.1		CAL0129599	MAG2	YLR427W	YLR427W	Anc_4.308	YLR427W	MAG2	Cytoplasmic protein of unknown function; induced in response to mycotoxin patulin; ubiquitinated protein similar to the human ring finger motif protein RNF10; predicted to be involved in repair of alkylated DNA due to interaction with MAG1				99	395	55	165	81.0525	295.108		188.08	5.53681	1.86431
CAGL0L06314g		1767	-273897	ChrL	714168	712402	C	CAGL-IPF4484|CAGL-CDS1570.1|CAG62020.1		CAL0135380	ARX1	YDR101C	YDR101C	Anc_8.245	YDR101C	ARX1	Nuclear export factor for the ribosomal pre-60S subunit; shuttling factor which directly binds FG rich nucleoporins and facilities translocation through the nuclear pore complex; interacts directly with Alb1p; responsible for Tif6p recycling defects in the absence of Rei1; associated with the ribosomal export complex				72	334	84	218	83.662	295.639		189.651	5.42883	1.82119
CAGL0E03201g		2562	50617	ChrE	295320	297881	W	CAGL-IPF2420|CAGL-CDS0681.1|CAG58747.1		CAL0128664	CHO2	YGR157W	YGR157W	Anc_4.064	YGR157W	CHO2	Phosphatidylethanolamine methyltransferase (PEMT); catalyzes the first step in the conversion of phosphatidylethanolamine to phosphatidylcholine during the methylation pathway of phosphatidylcholine biosynthesis				178	478	167	430	182.769	491.765		337.267	5.42173	1.42795
CAGL0D00836g		1860	-453962	ChrD	101555	99696	C	CAGL-IPF2609|CAGL-CDS1407.1|CAG58361.1		CAL0128303	SYO1	YDL063C	YDL063C	Anc_4.248	YDL063C	SYO1	Transport adaptor or symportin; facilitates synchronized nuclear coimport of the two 5S-rRNA binding proteins Rpl5p and Rpl11p; required for biogenesis of the large ribosomal subunit; green fluorescent protein (GFP)-fusion protein localizes to the cytoplasm and nucleus				67	289	52	177	63.386	249.133		156.26	5.3918	1.97468
CAGL0B03553g		3066	-95281	ChrB	354365	357430	W	CAGL-IPF760|CAGL-CDS0418.1|CAG58026.1		CAL0127128	POL5	YEL055C	YEL055C	Anc_6.007	YEL055C	POL5	DNA Polymerase phi; has sequence similarity to the human MybBP1A and weak sequence similarity to B-type DNA polymerases, not required for chromosomal DNA replication; required for the synthesis of rRNA				28	208	24	94	28.332	160.037		94.1845	5.34944	2.4979
CAGL0C05247g	MET22	1074	79861	ChrC	501476	502549	W	CAGL-IPF4091|CAGL-CDS3102.1|CAG58308.1		CAL0127514	MET22	YOL064C	YOL064C	Anc_3.157	YOL064C	MET22	Bisphosphate-3'-nucleotidase; involved in salt tolerance and methionine biogenesis; dephosphorylates 3'-phosphoadenosine-5'-phosphate and 3'-phosphoadenosine-5'-phosphosulfate, intermediates of the sulfate assimilation pathway				330	804	336	633	352.648	773.621		563.135	5.20135	1.1334
CAGL0E04994g		576	238731	ChrE	484427	485002	W	CAGL-IPF4999|CAGL-CDS4515.1|CAG58824.1		CAL0128784	RPL9A	YGL147C	YGL147C	Anc_2.321	YGL147C	RPL9A	Ribosomal 60S subunit protein L9A; homologous to mammalian ribosomal protein L9 and bacterial L6; RPL9A has a paralog, RPL9B, that arose from a single-locus duplication				86	305	93	264	95.6615	308.072		201.867	5.1705	1.68726
CAGL0J01529g		2016	-72703	ChrJ	145681	143666	C	CAGL-IPF7847|CAGL-CDS1196.1|CAG60725.1		CAL0133752	RCO1	YMR075W	YMR075W	Anc_2.538	YMR075W	RCO1	Essential component of the Rpd3S histone deacetylase complex; interacts with Eaf3p				188	541	194	397	202.767	503.943		353.355	5.07889	1.31344
CAGL0C01331g		1125	-280315	ChrC	141275	142399	W	CAGL-IPF7235|CAGL-CDS2945.1|CAG58138.1		CAL0127520	HPM1	YIL110W	YIL110W	Anc_2.259	YIL110W	HPM1	AdoMet-dependent methyltransferase; involved in a novel 3-methylhistidine modification of ribosomal protein Rpl3p; seven beta-strand MTase family member; null mutant exhibits a weak vacuolar protein sorting defect and caspofungin resistance				91	387	73	147	87.0515	280.568		183.81	4.96321	1.68841
CAGL0F03399g	SCS7	1143	108281	ChrF	335097	333955	C	CAGL-IPF1765|CAGL-CDS2894.1|CAG59041.1		CAL0131212	SCS7	YMR272C	YMR272C	Anc_8.829	YMR272C	SCS7	Sphingolipid alpha-hydroxylase; functions in the alpha-hydroxylation of sphingolipid-associated very long chain fatty acids, has both cytochrome b5-like and hydroxylase/desaturase domains, not essential for growth				403	888	392	708	420.256	859.534		639.895	4.94665	1.03229
CAGL0J06666g		339	421869	ChrJ	639415	639077	C	CAGL-IPF2329|CAGL-CDS5297.1|CAG60946.1		CAL0132826	YML108W	YML108W	YML108W	Anc_8.830	YML108W		Protein of unknown function; structure defines a new subfamily of the split beta-alpha-beta sandwiches; green fluorescent protein (GFP)-fusion protein localizes to the cytoplasm and nucleus; YML108W is not an essential gene; relative distribution to the nucleus increases upon DNA replication stress				1	117	11	29	7.6105	76.4795		42.045	4.67949	3.32901
CAGL0I08063g		1404	-3793	ChrI	788285	789688	W	CAGL-IPF4324|CAGL-CDS2270.1|CAG60537.1		CAL0132196	THP1	YOL072W	YOL072W	Anc_3.141	YOL072W	THP1	Nuclear pore-associated protein; component of TREX-2 complex (Sac3p-Thp1p-Sus1p-Cdc31p) involved in transcription elongation and mRNA export from the nucleus; involved in post-transcriptional tethering of active genes to the nuclear periphery and to non-nascent mRNP; contains a PAM domain implicated in protein-protein binding				122	436	162	284	151.991	385.282		268.637	4.64687	1.34193
CAGL0I04070g		915	-435847	ChrI	357390	356476	C	CAGL-IPF5943|CAGL-CDS3574.1|CAG60363.1		CAL0132336	SLC1	YDL052C	YDL052C	Anc_4.226	YDL052C	SLC1	1-acyl-sn-glycerol-3-phosphate acyltransferase; catalyzes the acylation of lysophosphatidic acid to form phosphatidic acid, a key intermediate in lipid metabolism; enzymatic activity detected in lipid particles and microsomes				188	504	203	377	207.767	473.734		340.75	4.5332	1.18911
CAGL0L11836g		2544	283949	ChrL	1269859	1272402	W	CAGL-IPF8348|CAGL-CDS0694.1|CAG62256.1		CAL0135216	BCK2	YER167W	YER167W	Anc_8.232	YER167W	BCK2	Serine/threonine-rich protein involved in PKC1 signaling pathway; protein kinase C (PKC1) signaling pathway controls cell integrity; overproduction suppresses pkc1 mutations				211	394	193	475	213.712	476.113		344.912	4.42664	1.15564
CAGL0M06831g	CRZ1	1938	-353478	ChrM	695162	697099	W	CAGL-IPF6180|CAGL-CDS1292.1|CAG62620.1		CAL0137005	CRZ1	YNL027W	YNL027W	Anc_2.303	YNL027W	CRZ1	Transcription factor, activates transcription of stress response genes; nuclear localization is positively regulated by calcineurin-mediated dephosphorylation; rapidly localizes to the nucleus under blue light stress				246	594	249	435	262.32	552.692		407.506	4.39088	1.07515		0
CAGL0J07414g		1089	501023	ChrJ	717856	718944	W	CAGL-IPF2377|CAGL-CDS3047.1|CAG60980.1		CAL0133496	ELA1	YNL230C	YNL230C	Anc_2.013	YNL230C	ELA1	Elongin A; F-box protein that forms a heterodimer with Elc1p and is required for ubiquitin-dependent degradation of the RNA Polymerase II subunit Rpo21p; subunit of the Elongin-Cullin-Socs (ECS) ligase complex				257	575	205	383	243.377	512.746		378.062	4.26714	1.07505
CAGL0J06776g		3084	435474	ChrJ	651309	654392	W	CAGL-IPF2337|CAGL-CDS0407.1|CAG60951.1		CAL0129863	KAP120	YPL125W	YPL125W	Anc_8.624	YPL125W	KAP120	Karyopherin responsible for the nuclear import of Rfp1p; Rfp1p is a ribosome maturation factor				56	238	50	117	56.775	188.504		122.639	4.21815	1.73126
CAGL0M00506g		3141	-987794	ChrM	63385	60245	C	CAGL-IPF5420|CAGL-CDS0381.1|CAG62343.1		CAL0137277	NMD5	YJR132W	YJR132W	Anc_4.361	YJR132W	NMD5	Karyopherin; a carrier protein involved in nuclear import of proteins; importin beta homolog				41	154	31	123	38.7205	150.017		94.3685	4.1886	1.95395
CAGL0F06545g		741	419484	ChrF	645359	646099	W	CAGL-IPF460|CAGL-CDS4038.1|CAG59176.1		CAL0130890	RIM9	YMR063W	YMR063W	Anc_2.630	YMR063W	RIM9	Plasma membrane protein of unknown function; involved in the proteolytic activation of Rim101p in response to alkaline pH; interacts with Rim21p and Dfg16p to form a pH-sensing complex in the Rim101 pathway and is required to maintain Rim21p levels; has similarity to A. nidulans PalI;				129	363	139	271	142.714	341.171		241.942	4.16687	1.25736		0
CAGL0A02299g		840	173965	ChrA	250851	251690	W	CAGL-IPF2972|CAGL-CDS3759.1|CAG57757.1		CAL0126895							#N/A				178	474	225	371	214.988	455.221		335.104	4.09897	1.08231		0
CAGL0J10179g		183	779506	ChrJ	996974	996792	C	CAGL-IPF13818|CAG61104.1		CAL0133164	TOM7	YNL070W	YNL070W	Anc_2.226	YNL070W	TOM7	Component of the TOM (translocase of outer membrane) complex; responsible for recognition and initial import steps for all mitochondrially directed proteins; promotes assembly and stability of the TOM complex				175	495	223	344	212.376	449.912		331.144	4.08241	1.08302
CAGL0H06655g		1275	-292713	ChrH	662987	661713	C	CAGL-IPF288|CAGL-CDS2610.1|CAG60018.1		CAL0130004	RRD1	YIL153W	YIL153W	Anc_5.709	YIL153W	RRD1	Peptidyl-prolyl cis/trans-isomerase; activator of the phosphotyrosyl phosphatase activity of PP2A; involved in G1 phase progression, microtubule dynamics, bud morphogenesis and DNA repair; required for rapid reduction of Sgs1p levels in response to rapamycin; subunit of the Tap42p-Sit4p-Rrd1p complex; protein increases in abundance and relative distribution to the nucleus increases upon DNA repli…				52	178	86	212	74.773	214.126		144.45	3.99608	1.51787
CAGL0K11132g		1434	828313	ChrK	1086749	1085316	C	CAGL-IPF3274|CAGL-CDS2209.1|CAG61663.1		CAL0133985	SNU56	YDR240C	YDR240C	Anc_8.464	YDR240C	SNU56	Component of U1 snRNP required for mRNA splicing via spliceosome; yeast specific, no metazoan counterpart; interacts with mRNA in commitment complex				10	105	24	78	19.332	99.169		59.2505	3.98397	2.3589
CAGL0C02145g		2877	-203809	ChrC	219781	216905	C	CAGL-IPF1079|CAGL-CDS0860.1|CAG58175.1		CAL0127232	SAP155	YGL229C	YFR040W	Anc_3.547	YFR040W	SAP4	Protein required for function of the Sit4p protein phosphatase; forms a complex with Sit4p; member of a family of similar proteins including Sap4p, Sap185p, and Sap190p; protein abundance increases in response to DNA replication stress; SAP155 has a paralog, SAP4, that arose from the whole genome duplication				151	362	131	257	149.27	332.474		240.872	3.82147	1.15531
CAGL0I04774g		1272	-364699	ChrI	428716	427445	C	CAGL-IPF5892|CAGL-CDS2619.1|CAG60394.1		CAL0129668	CSG2	YBR036C	YBR036C	Anc_3.227	YBR036C	CSG2	Endoplasmic reticulum membrane protein; required for mannosylation of inositolphosphorylceramide and for growth at high calcium concentrations; protein abundance increases in response to DNA replication stress				13	98	26	85	21.943	99.7675		60.8552	3.74211	2.18481
CAGL0J07722g		789	536654	ChrJ	754425	753637	C	CAGL-IPF2399|CAGL-CDS3901.1|CAG60994.1		CAL0132872	VPS75	YNL246W	YNL246W	Anc_1.116	YNL246W	VPS75	NAP family histone chaperone; binds to histones and Rtt109p, stimulating histone acetyltransferase activity; possesses nucleosome assembly activity in vitro; proposed role in vacuolar protein sorting and in double-strand break repair; protein abundance increases in response to DNA replication stress; relocalizes to the cytosol in response to hypoxia				183	568	195	209	200.822	407.37		304.096	3.71757	1.02042
CAGL0K08426g		693	593158	ChrK	850532	851224	W	CAGL-IPF3107|CAGL-CDS4161.1|CAG61551.1		CAL0134321		YGL200C	YGL200C	Anc_8.160	YGL200C	EMP24	Component of the p24 complex; binds to GPI anchor proteins and mediates their efficient transport from the ER to the Golgi; integral membrane protein that associates with endoplasmic reticulum-derived COPII-coated vesicles				77	208	80	192	83.94	217.416		150.678	3.68648	1.37303		0
CAGL0J02002g		1086	-16005	ChrJ	200829	201914	W	CAGL-IPF6472|CAGL-CDS3071.1|CAG60741.1		CAL0132888	YIA6	YIL006W	YIL006W	Anc_7.133	YIL006W	YIA6	Mitochondrial NAD+ transporter; involved in the transport of NAD+ into the mitochondria (see also YEA6); member of the mitochondrial carrier subfamily; disputed role as a pyruvate transporter; has putative mouse and human orthologs; YIA6 has a paralog, YEA6, that arose from the whole genome duplication				182	358	182	363	193.101	392.537		292.819	3.67198	1.02347
CAGL0A04565g	SWI4	3126	374832	ChrA	450575	453700	W	CAGL-IPF1129|CAGL-CDS0386.1|CAG57859.1		CAL0126629		YER111C	YER111C	Anc_7.409	YER111C	SWI4	DNA binding component of the SBF complex (Swi4p-Swi6p); a transcriptional activator that in concert with MBF (Mbp1-Swi6p) regulates late G1-specific transcription of targets including cyclins and genes required for DNA synthesis and repair; Slt2p-independent regulator of cold growth; acetylation at two sites, K1016 and K1066, regulates interaction with Swi6p				99	267	87	182	98.8285	241.061		169.945	3.65003	1.2864
CAGL0D04488g		783	-115741	ChrD	438456	439238	W	CAGL-IPF4671|CAGL-CDS3919.1|CAG58521.1		CAL0128251	RRG8	YPR116W	YPR116W	Anc_3.440	YPR116W	RRG8	Putative protein of unknown function; required for mitochondrial genome maintenance; null mutation results in a decrease in plasma membrane electron transport				186	442	135	215	168.993	347.882		258.438	3.54929	1.04164
CAGL0F01023g		1191	-117495	ChrF	109345	108155	C	CAGL-IPF3745|CAGL-CDS2788.1|CAG58942.1		CAL0130862	NOP12	YOL041C	YOL041C	Anc_7.093	YOL041C	NOP12	Nucleolar protein involved in pre-25S rRNA processing; also involved in biogenesis of large 60S ribosomal subunit; contains an RNA recognition motif (RRM); binds to Ebp2; similar to Nop13p and Nsr1p				42	185	50	98	49.775	150.879		100.327	3.53529	1.5999
CAGL0K11231g	MNN10	1152	834214	ChrK	1091358	1092509	W	CAGL-IPF3278|CAGL-CDS2874.1|CAG61666.1		CAL0133965	MNN10	YDR245W	YDR245W	Anc_8.471	YDR245W	MNN10	Subunit of a Golgi mannosyltransferase complex; complex mediates elongation of the polysaccharide mannan backbone; membrane protein of the mannosyltransferase family; other members of the complex are Anp1p, Mnn9p, Mnn11p, and Hoc1p				59	153	42	136	53.831	157.128		105.48	3.50008	1.54543		0
CAGL0M02079g		1815	-797044	ChrM	253472	251658	C	CAGL-IPF6381|CAGL-CDS1486.1|CAG62412.1		CAL0136301	BEM4	YPL161C	YPL161C	Anc_8.685	YPL161C	BEM4	Protein involved in establishment of cell polarity and bud emergence; interacts with the Rho1p small GTP-binding protein and with the Rho-type GTPase Cdc42p; involved in maintenance of proper telomere length				182	419	154	249	177.547	356.289		266.918	3.47036	1.00485
CAGL0G09911g		2262	886164	ChrG	948077	945816	C	CAGL-IPF1525|CAGL-CDS0927.1|CAG59718.1	n	CAL0129220	SEC23		YPR181C	Anc_7.537	YPR181C	SEC23	GTPase-activating protein, stimulates the GTPase activity of Sar1p; component of the Sec23p-Sec24p heterodimer of the COPII vesicle coat, involved in ER to Golgi transport; substrate of Ubp3/Bre5 complex; ubiquitylated by Ub-ligase Rsp5p; proteasome-mediated degradation of Sec23p is regulated by Cdc48p	dup			132	296	123	240	135.327	289.52		212.423	3.43825	1.09722
CAGL0I06721g		273	-141156	ChrI	651760	651488	C	CAGL-IPF14689|CAG60479.1		CAL0132280	LSM5	YER146W	YER146W	Anc_8.192	YER146W	LSM5	Lsm (Like Sm) protein; part of heteroheptameric complexes (Lsm2p-7p and either Lsm1p or 8p): cytoplasmic Lsm1p complex involved in mRNA decay; nuclear Lsm8p complex part of U6 snRNP and possibly involved in processing tRNA, snoRNA, and rRNA				75	296	144	191	118.492	260.831		189.661	3.39334	1.13832
CAGL0K02321g		1068	-49104	ChrK	208082	209149	W	CAGL-IPF2269|CAGL-CDS3114.1|CAG61287.1		CAL0134779	EAF3	YPR023C	YPR023C	Anc_8.131	YPR023C	EAF3	Component of the Rpd3S histone deacetylase complex; Esa1p-associated factor, nonessential component of the NuA4 acetyltransferase complex, homologous to Drosophila dosage compensation protein MSL3; plays a role in regulating Ty1 transposition				34	117	72	173	57.996	160.791		109.394	3.39176	1.47117
CAGL0J05247g		258	290068	ChrJ	507573	507316	C	Novel_proteincoding27		CAL0000207994							#N/A				3	63	2	13	3.611	40.1115		21.8612	3.3899	3.47355
CAGL0C04741g	SOD1	465	21813	ChrC	444197	443733	C	CAGL-IPF9630|CAGL-CDS4796.1|CAG58285.1		CAL0127282	SOD1	YJR104C	YJR104C	Anc_7.477	YJR104C	SOD1	Cytosolic copper-zinc superoxide dismutase; detoxifies superoxide and is involved in repressing respiration in the presence of glucose, via stabilization of Yck1p and Yck2p kinases; human ortholog is implicated in ALS (amyotrophic lateral sclerosis); abundance increases under DNA replication stress and during prolonged exposure to boric acid; a fraction is localized to the mitochondrial intermemb…				126	246	132	282	137.326	289.111		213.219	3.37104	1.07402
CAGL0H09724g		1560	-4370	ChrH	951472	949913	C	CAGL-IPF54|CAGL-CDS1960.1|CAG60154.1		CAL0131974	NUG1	YER006W	YER006W	Anc_7.150	YER006W	NUG1	GTPase that associates with nuclear 60S pre-ribosomes; required for export of 60S ribosomal subunits from the nucleus				97	355	117	127	114.493	252.858		183.676	3.35902	1.14306
CAGL0G01254g	ARO8	1515	59255	ChrG	119281	120795	W	CAGL-IPF3866|CAGL-CDS2054.1|CAG59343.1		CAL0137647		YGL202W	YGL202W	Anc_3.511	YGL202W	ARO8	Aromatic aminotransferase I; expression is regulated by general control of amino acid biosynthesis				92	287	94	139	99.217	225.885		162.551	3.30015	1.18693
CAGL0D04202g		1500	-139789	ChrD	414049	415548	W	CAGL-IPF4688|CAGL-CDS2079.1|CAG58510.1		CAL0128407	ICE2	YIL090W	YIL090W	Anc_2.293	YIL090W	ICE2	Integral ER membrane protein with type-III transmembrane domains; required for maintenance of ER zinc homeostasis; necessary for efficient targeting of Trm1p tRNA methyltransferase to inner nuclear membrane; mutations cause defects in cortical ER morphology in both the mother and daughter cells				2	48	6	34	5.333	44.907		25.12	3.24633	3.07392
CAGL0K10010g		1179	721529	ChrK	979838	978660	C	CAGL-IPF3196|CAGL-CDS2810.1|CAG61617.1		CAL0134415	RRP8	YDR083W	YDR083W	Anc_8.215	YDR083W	RRP8	Nucleolar S-adenosylmethionine-dependent rRNA methyltransferase; methylates adenine (m1A) of the large subunit (LSU) rRNA at position 645; involved in pre-rRNA cleavage at site A2; mutation is synthetically lethal with a gar1 mutation; deletion disrupts telomere maintenance by influencing the expression of neighboring gene STN1				18	143	46	64	35.553	109.972		72.7625	3.06169	1.62909
CAGL0G05852g		924	504916	ChrG	565237	566160	W	CAGL-IPF3476|CAGL-CDS3544.1|CAG59543.1		CAL0137591	DCD1	YHR144C	YHR144C	Anc_2.084	YHR144C	DCD1	Deoxycytidine monophosphate (dCMP) deaminase; involved in dUMP and dTMP biosynthesis; expression is NOT cell cycle regulated				13	73	1	22	8.0555	50.381		29.2183	3.04112	2.64483
CAGL0H00847g		1089	-872089	ChrH	83518	82430	C	CAGL-IPF9208|CAGL-CDS3058.1|CAG59767.1		CAL0130036	HUT1	YPL244C	YPL244C	Anc_6.272	YPL244C	HUT1	Protein with a role in UDP-galactose transport to the Golgi lumen; has similarity to human UDP-galactose transporter UGTrel1, exhibits a genetic interaction with S. cerevisiae ERO1				0	43	1	6	1.5555	26.013		13.7842	3.03782	4.06378		0
CAGL0H07909g		2649	-180998	ChrH	772741	775389	W	CAGL-IPF192|CAGL-CDS0629.1|CAG60075.1		CAL0131490	SEC15	YGL233W	YGL233W	Anc_3.554	YGL233W	SEC15	Essential 113 kDa subunit of the exocyst complex; the exocyst mediates polarized targeting and tethering of post-Golgi secretory vesicles to active sites of exocytosis prior to SNARE-mediated fusion; interacts with and functions as a downstream effector of active, GTP-bound Sec4p, a Rab family GTPase				93	209	114	216	110.827	231.968		171.398	3.03528	1.06562
CAGL0K10978g		2070	814940	ChrK	1071625	1073694	W	CAGL-IPF3262|CAGL-CDS1127.1|CAG61656.1		CAL0134839	LYS4	YDR234W	YDR234W	Anc_8.455	YDR234W	LYS4	Homoaconitase; catalyzes the conversion of homocitrate to homoisocitrate, which is a step in the lysine biosynthesis pathway				9	31	10	71	11.055	58.0705		34.5628	3.02121	2.39311
CAGL0K12804g		519	1012045	ChrK	1270024	1269506	C	CAGL-IPF4613|CAGL-CDS4653.1|CAG61736.1		CAL0134857		YLR074C	YLR074C	Anc_8.011	YLR074C	BUD20	C2H2-type zinc finger protein required for ribosome assembly; shuttling factor which associates with pre-60S particles in the nucleus, accompanying them to the cytoplasm; cytoplasmic dissociation of Bud20p requires Drg1p; N-terminus harbors a nuclear localization signal (NLS) and a nuclear export signal (NES); cytoplasmic Bud20p is reimported by Kap123-dependent pathway; involved in bud-site sele…				2	54	5	20	4.7775	39.71		22.2437	3.01125	3.05517
CAGL0I04994g	MET6	2304	-334341	ChrI	457287	459590	W	CAGL-IPF1313|CAGL-CDS0893.1|CAG60404.1		CAL0132720	MET6	YER091C	YER091C	Anc_7.378	YER091C	MET6	Cobalamin-independent methionine synthase; involved in methionine biosynthesis and regeneration; requires a minimum of two glutamates on the methyltetrahydrofolate substrate, similar to bacterial metE homologs				33	121	45	101	42.4975	120.636		81.5665	2.99875	1.5052
CAGL0A02508g		951	192259	ChrA	269090	270040	W	CAGL-IPF2946|CAGL-CDS3444.1|CAG57766.1		CAL0126881	YPQ2	YDR352W	YDR352W	Anc_5.408	YDR352W	YPQ2	Putative vacuolar membrane transporter for cationic amino acids; likely contributes to amino acid homeostasis by exporting cationic amino acids from the vacuole; member of the PQ-loop family, with seven transmembrane domains; mutant phenotype is functionally complemented by rat PQLC2 vacuolar transporter				40	188	91	125	71.5505	168.188		119.869	2.97147	1.23304
CAGL0H09812g		2952	1908	ChrH	958446	955495	C	CAGL-IPF51|CAGL-CDS0466.1|CAG60157.1		CAL0131454	SOK1	YDR006C	YDR006C	Anc_3.195	YDR006C	SOK1	Protein of unknown function; overexpression suppresses the growth defect of mutants lacking protein kinase A activity; involved in cAMP-mediated signaling; localized to the nucleus; similar to the mouse testis-specific protein PBS13				4507	10004	4037	6345	4497.05	8718		6607.53	7.69574	0.955017
CAGL0A01045g		1452	28285	ChrA	106316	104865	C	CAGL-IPF3369|CAGL-CDS2173.1|CAG57707.1		CAL0126563	FUM1	YPL262W	YPL262W	Anc_6.013	YPL262W	FUM1	Fumarase; converts fumaric acid to L-malic acid in the TCA cycle; cytosolic and mitochondrial distribution determined by the N-terminal targeting sequence, protein conformation, and status of glyoxylate shunt; phosphorylated in mitochondria			mito	3973	7366	4730	7955	4615.01	8341.65		6478.33	6.86428	0.853998
CAGL0L10406g	CYT1	900	126946	ChrL	1113678	1114577	W	CAGL-IPF4154|CAGL-CDS3604.1|CAG62193.1		CAL0136002	CYT1	YOR065W	YOR065W	Anc_5.666	YOR065W	CYT1	Cytochrome c1; component of the mitochondrial respiratory chain; expression is regulated by the heme-activated, glucose-repressed Hap2p/3p/4p/5p CCAAT-binding complex			mito	1767	3220	1442	2650	1685.53	3162.57		2424.05	6.20627	0.907897
CAGL0D06578g		261	71197	ChrD	625655	625915	W	CAGL-IPF15179|CAG58602.1		CAL0128057	COX19	YLL018C-A	YLL018C-A	Anc_4.043	YLL018C-A	COX19	Protein required for cytochrome c oxidase assembly; located in the cytosol and mitochondrial intermembrane space; putative copper metallochaperone that delivers copper to cytochrome c oxidase; contains twin cysteine-x9-cysteine motifs			mito	1499	2929	1407	2462	1532.09	2907		2219.54	6.20178	0.924032
CAGL0C04092g	TRP1	654	-18096	ChrC	404382	403729	C	CAGL-IPF913|CAGL-CDS4285.1|CAG58259.1		CAL0127496		YDR007W	YDR007W	Anc_3.192	YDR007W	TRP1	Phosphoribosylanthranilate isomerase; catalyzes the third step in tryptophan biosynthesis; in 2004, the sequence of TRP1 from strain S228C was updated by changing the previously annotated internal STOP (TAA) to serine (TCA)				1556	3083	1315	2169	1509.48	2812.45		2160.97	5.99128	0.897773
CAGL0C03553g		1323	-66778	ChrC	356035	354713	C	CAGL-IPF957|CAGL-CDS2475.1|CAG58237.1		CAL0127246	PET494	YNR045W	YNR045W	Anc_6.369	YNR045W	PET494	Mitochondrial translational activator specific for the COX3 mRNA; acts together with Pet54p and Pet122p; located in the mitochondrial inner membrane			mito	2607	4086	2072	3869	2455.5	4309.3		3382.4	5.90943	0.811439
CAGL0I03190g	RIP1	642	-518478	ChrI	274622	273981	C	CAGL-IPF7346|CAGL-CDS4323.1|CAG60324.1		CAL0132258	RIP1	YEL024W	YEL024W	Anc_1.461	YEL024W	RIP1	Ubiquinol-cytochrome-c reductase; a Rieske iron-sulfur protein of the mitochondrial cytochrome bc1 complex; transfers electrons from ubiquinol to cytochrome c1 during respiration; during import, Rip1p is first imported into the mitochondrial matrix where it is processed, acquires its Fe-S cluster, and is folded, then is translocated into the inner membrane by the action of a homo-oligomer of Bcs1…			mito	859	1769	835	1496	894.342	1761.41		1327.88	5.81483	0.97783
CAGL0M10483g		1299	811	ChrM	1051069	1049771	C	CAGL-IPF8950|CAGL-CDS2546.1|CAG62780.1		CAL0136765	RMD1	YDL001W	YDL001W	Anc_3.209	YDL001W	RMD1	Cytoplasmic protein required for sporulation				1226	2408	977	1599	1156.72	2141.21		1648.97	5.57617	0.888385
CAGL0F00231g		924	-196078	ChrF	29705	30628	W	CAGL-IPF3803|CAGL-CDS3546.1|CAG58908.1		CAL0129539	MIR1	YJR077C	YJR077C	Anc_1.536	YJR077C	MIR1	Mitochondrial phosphate carrier; imports inorganic phosphate into mitochondria; functionally redundant with Pic2p but more abundant than Pic2p under normal conditions; phosphorylated			mito	946	2009	1054	1638	1059.5	1964.55		1512.02	5.47476	0.890819
CAGL0F02365g		696	2133	ChrF	228030	228725	W	CAGL-IPF5717|CAGL-CDS4152.1|CAG58997.1		CAL0129641	FAR7	YFR008W	YFR008W	Anc_8.105	YFR008W	FAR7	Protein involved in recovery from pheromone-induced cell cycle arrest; acts in a Far1p-independent pathway; interacts with Far3p, Far8p, Far9p, Far10p, and Far11p; protein abundance increases in response to DNA replication stress				2457	4583	2396	3359	2560.48	4259.19		3409.84	5.35429	0.734167
CAGL0A02574g		1140	200179	ChrA	276915	278054	W	CAGL-IPF1309|CAGL-CDS2904.1|CAG57769.1		CAL0126945	TRP4	YDR354W	YDR354W	Anc_5.413	YDR354W	TRP4	Anthranilate phosphoribosyl transferase; transferase of the tryptophan biosynthetic pathway; catalyzes the phosphoribosylation of anthranilate; subject to the general control system of amino acid biosynthesis				1477	2654	1347	2129	1487.76	2574.53		2031.14	5.2093	0.791168
CAGL0F02805g		765	48607	ChrF	275234	274470	C	CAGL-IPF1816|CAGL-CDS3966.1|CAG59016.1		CAL0131202	STE14	YDR410C	YDR410C	Anc_5.510	YDR410C	STE14	Farnesyl cysteine-carboxyl methyltransferase; mediates the carboxyl methylation step during C-terminal CAAX motif processing of a-factor and RAS proteins in the endoplasmic reticulum, localizes to the ER membrane				575	1233	498	868	565.139	1125.71		845.427	5.20539	0.994163
CAGL0H09394g		906	-34142	ChrH	921373	920468	C	CAGL-IPF76|CAGL-CDS3594.1|CAG60140.1		CAL0130200											587	1286	747	1204	709.458	1348.94		1029.2	5.14338	0.927038
CAGL0G00506g		5871	-9313	ChrG	54405	48535	C	CAGL-IPF3921|CAGL-CDS0039.1|CAG59314.1		CAL0129208	SLH1	YGR271W	YGR271W	Anc_5.031	YGR271W	SLH1	Putative RNA helicase related to Ski2p; involved in translation inhibition of non-poly(A) mRNAs; required for repressing propagation of dsRNA viruses				4364	7009	3868	5496	4331.67	6723.41		5527.54	4.99061	0.634268
CAGL0M10439g		2310	-1406	ChrM	1047048	1049357	W	CAGL-IPF8949|CAGL-CDS0900.1|CAG62779.1		CAL0136281	NTH1		YDR001C	Anc_3.205	YDR001C	NTH1	Neutral trehalase, degrades trehalose; required for thermotolerance and may mediate resistance to other cellular stresses; may be phosphorylated by Cdc28p; inhibited by Dcs1p; NTH1 has a paralog, NTH2, that arose from the whole genome duplication	dup			2267	3728	1938	2935	2211.06	3583.44		2897.25	4.93177	0.696609
CAGL0A03927g		1314	320530	ChrA	397179	398492	W	CAGL-IPF1191|CAGL-CDS2494.1|CAG57830.1		CAL0126721	MSS51	YLR203C	YLR203C	Anc_7.346	YLR203C	MSS51	Specific translational activator for the mitochondrial COX1 mRNA; loosely associated with the matrix face of the mitochondrial inner membrane; influences both COX1 mRNA translation and Cox1p assembly into cytochrome c oxidase; binds to heme B, which may be a mechanism for sensing oxygen levels in order to regulate cytochrome c oxidase biogenesis			mito	630	1123	485	947	585.418	1116.97		851.193	4.89026	0.932051
CAGL0J03014g		1722	73595	ChrJ	291832	290111	C	CAGL-IPF6559|CAGL-CDS1649.1|CAG60784.1		CAL0133258	VHR2	YIL056W	YER064C	Anc_7.246	YER064C	VHR2	Non-essential nuclear protein; null mutation has global effects on transcription; VHR2 has a paralog, VHR1, that arose from the whole genome duplication; relative distribution to the nucleus increases upon DNA replication stress				669	1303	573	974	653.802	1222.78		938.289	4.87903	0.903237
CAGL0A03366g		1773	267567	ChrA	345759	343987	C	CAGL-IPF1236|CAGL-CDS1556.1|CAG57807.1		CAL0126639	ADE16	YMR120C	YMR120C	Anc_2.418	YMR120C	ADE17	Enzyme of 'de novo' purine biosynthesis; contains both 5-aminoimidazole-4-carboxamide ribonucleotide transformylase and inosine monophosphate cyclohydrolase activities; ADE17 has a paralog, ADE16, that arose from the whole genome duplication; ade16 ade17 mutants require adenine and histidine				6006	8431	6698	9994	6724.74	10068		8396.36	4.82888	0.582225
CAGL0G07337g		1857	634611	ChrG	694466	696322	W	CAGL-IPF7076|CAGL-CDS1413.1|CAG59607.1		CAL0137645		YDR456W	YDR456W	Anc_5.573	YDR456W	NHX1	Na+/H+ and K+/H+ exchanger; required for intracellular sequestration of Na+ and K+; located in the vacuole and late endosome compartments; required for osmotolerance to acute hypertonic shock and for vacuolar fusion; ortholog of human NHE9, which is linked to autism				409	733	474	932	468.807	913.186		690.996	4.72714	0.961915
CAGL0J00847g		2133	-126819	ChrJ	91624	89492	C	CAGL-IPF9010|CAGL-CDS1059.1|CAG60696.1		CAL0133218	YJL045W	YKL148C	YJL045W	Anc_5.253	YJL045W		Minor succinate dehydrogenase isozyme; participates in oxidation of succinate and transfer of electrons to ubiquinone; induced during the diauxic shift in a Cat8p-dependent manner; YJL045W has a paralog, SDH1, that arose from the whole genome duplication			mito	25268	30879	23085	35568	25458.7	36265.6		30862.1	4.70552	0.510441
CAGL0M08910g	SNF1	1839	-160987	ChrM	889541	887703	C	CAGL-IPF8167|CAGL-CDS1441.1|CAG62709.1		CAL0136473	SNF1	YDR477W	YDR477W	Anc_5.611	YDR477W	SNF1	AMP-activated serine/threonine protein kinase; found in a complex containing Snf4p and members of the Sip1p/Sip2p/Gal83p family; required for transcription of glucose-repressed genes, thermotolerance, sporulation, and peroxisome biogenesis; involved in regulation of the nucleocytoplasmic shuttling of Hxk2p; regulates filamentous growth in response to starvation				4091	6678	4192	5603	4375.16	6620.56		5497.86	4.6987	0.597618		0
CAGL0H09350g		5898	-39662	ChrH	918349	912452	C	CAGL-IPF79|CAGL-CDS0038.1|CAG60138.1		CAL0131526	UBR1	YGR184C	YGR184C	Anc_5.190	YGR184C	UBR1	E3 ubiquitin ligase (N-recognin); heterodimerizes with Rad6p to ubiquitinate substrates in the N-end rule pathway; role in endoplasmic reticulum-associated protein degradation (ERAD) in the absence of canonical ER membrane ligases or after stress; major role in targeting misfolded cytosolic proteins for degradation; regulates peptide transport via Cup9p ubiquitination; mutation in human UBR1 caus…				4869	7741	3737	4986	4511.4	6790.8		5651.1	4.65662	0.590006
CAGL0L07282g		1029	-179046	ChrL	808650	807622	C	CAGL-IPF8881|CAGL-CDS3226.1|CAG62064.1		CAL0135540	BUG1	YDL099W	YDL099W	Anc_2.356	YDL099W	BUG1	Cis-golgi localized protein involved in ER to Golgi transport; forms a complex with the mammalian GRASP65 homolog, Grh1p; mutants are compromised for the fusion of ER-derived vesicles with Golgi membranes				674	1419	578	834	659.079	1198.81		928.943	4.64837	0.863076
CAGL0F04345g		2790	208130	ChrF	435769	432980	C	CAGL-IPF1691|CAGL-CDS0556.1|CAG59084.1		CAL0129328		YBR086C	YBR086C	Anc_3.323	YBR086C	IST2	Cortical ER protein involved in ER-plasma membrane tethering; one of 6 proteins (Ist2p, Scs2p, Scs22p, Tcb1p, Tcb2p, Tcb3p) that connect ER to the plasma membrane (PM) and regulate PM phosphatidylinositol-4-phosphate (PI4P) levels by controlling access of Sac1p phosphatase to its substrate PI4P in the PM; localizes to the mother cell in small-budded cells and to the bud in medium- and large-budde…				1172	2058	1027	1557	1157.5	1941.62		1549.56	4.61406	0.746253
CAGL0K08514g		4470	598658	ChrK	858612	854143	C	CAGL-IPF3104|CAGL-CDS0108.1|CAG61554.1		CAL0134667	HSL1	YKL101W	YKL101W	Anc_2.479	YKL101W	HSL1	Nim1p-related protein kinase; regulates the morphogenesis and septin checkpoints; associates with the assembled septin filament; required along with Hsl7p for bud neck recruitment, phosphorylation, and degradation of Swe1p				648	1274	473	754	587.752	1079.47		833.609	4.57247	0.877041
CAGL0A02992g		1374	232070	ChrA	310062	308689	C	CAGL-IPF1269|CAGL-CDS2333.1|CAG57789.1		CAL0126529	BCS1	YDR375C	YDR375C	Anc_5.448	YDR375C	BCS1	Protein translocase and chaperone required for Complex III assembly; member of the AAA ATPase family; forms a homo-oligomeric complex in the mitochondrial inner membrane that translocates the C-terminal domain of Rip1p from the matrix across the inner membrane, and then delivers it to an assembly intermediate of respiratory Complex III in an ATP-dependent reaction; also required for assembly of t…			mito	757	1356	684	1123	759.462	1336.52		1047.99	4.54743	0.815428
CAGL0G07491g	MNN11	1326	650881	ChrG	711001	712326	W	CAGL-IPF8274|CAGL-CDS2469.1|CAG59614.1		CAL0130536	MNN11	YJL183W	YJL183W	Anc_1.156	YJL183W	MNN11	Subunit of a Golgi mannosyltransferase complex; this complex also contains Anp1p, Mnn9p, Mnn10p, and Hoc1p, and mediates elongation of the polysaccharide mannan backbone; has homology to Mnn10p				928	1569	875	1424	951.062	1619.25		1285.16	4.5265	0.767715
CAGL0L09383g		1101	34224	ChrL	1020856	1021956	W	ZCF36|CAGL-IPF7462|CAGL-CDS3023.1|CAG62153.1		CAL0135730	SUT2		YPR009W	Anc_8.109	YPR009W	SUT2	Putative transcription factor of the Zn2Cys6 family; regulates sterol uptake under anaerobic conditions along with SUT1; multicopy suppressor of mutations that cause low activity of the cAMP/protein kinase A pathway; positively regulates mating along with SUT1 by repressing the expression of genes (PRR2, NCE102 and RHO5) which function as mating inhibitors; SUT2 has a paralog, SUT1, that arose fr…	dup			427	989	451	664	465.03	884.272		674.651	4.521	0.927165		0
CAGL0K02167g		3489	-63679	ChrK	195785	192297	C	CAGL-IPF8731|CAGL-CDS0272.1|CAG61280.1		CAL0134845	SAK1	YGL179C	YER129W	Anc_8.140	YER129W	SAK1	Upstream serine/threonine kinase for the SNF1 complex; partially redundant with Elm1p and Tos3p; members of this family have functional orthology with LKB1, a mammalian kinase associated with Peutz-Jeghers cancer-susceptibility syndrome; SAK1 has a paralog, TOS3, that arose from the whole genome duplication				4360	6296	3570	5189	4164.14	6187.16		5175.65	4.45308	0.57126
CAGL0C00517g		2547	-366725	ChrC	54154	56700	W	CAGL-IPF6647|CAGL-CDS0691.1|CAG58108.1		CAL0127432	HSL7	YBR133C	YBR133C	Anc_3.399	YBR133C	HSL7	Protein arginine N-methyltransferase; exhibits septin and Hsl1p-dependent bud neck localization and periodic Hsl1p-dependent phosphorylation; required along with Hsl1p for bud neck recruitment, phosphorylation, and degradation of Swe1p; relocalizes away from bud neck upon DNA replication stress				905	1738	946	1328	979.003	1647.54		1313.27	4.45271	0.750932
CAGL0K12056g		708	910090	ChrK	1167456	1168163	W	CAGL-IPF4661|CAGL-CDS4115.1|CAG61702.1		CAL0134859	RSM10	YDR041W	YDR041W	Anc_3.278	YDR041W	RSM10	Mitochondrial ribosomal protein of the small subunit; has similarity to E. coli S10 ribosomal protein; essential for viability, unlike most other mitoribosomal proteins			mito	338	749	421	692	403.865	780.666		592.266	4.43948	0.950831
CAGL0M10890g		1095	33066	ChrM	1082128	1083222	W	CAGL-IPF8853|CAGL-CDS3038.1|CAG62796.1		CAL0137485	PPG1	YNR032W	YNR032W	Anc_6.342	YNR032W	PPG1	Putative serine/threonine protein phosphatase; putative phosphatase of the type 2A-like phosphatase family, required for glycogen accumulation; interacts with Tap42p, which binds to and regulates other protein phosphatases				700	1265	650	1050	712.075	1248.28		980.175	4.43058	0.809835
CAGL0M02673g		858	-742734	ChrM	306446	307303	W	CAGL-IPF6594|CAGL-CDS3718.1|CAG62439.1		CAL0137269	COX11	YPL132W	YPL132W	Anc_8.641	YPL132W	COX11	Protein required for delivery of copper to Cox1p; mitochondrial inner membrane protein; association with mitochondrial ribosomes suggests that copper delivery may occur during translation of Cox1p			mito	687	1181	568	987	660.024	1169.39		914.706	4.42394	0.825164
CAGL0G06380g		1920	555675	ChrG	615498	617417	W	CAGL-IPF3433|CAGL-CDS1314.1|CAG59566.1		CAL0137577	GDS1	YOR355W	YOR355W	Anc_7.034	YOR355W	GDS1	Protein of unknown function; required for growth on glycerol as a carbon source; the authentic, non-tagged protein is detected in highly purified mitochondria in high-throughput studies				436	842	449	776	468.419	876.348		672.384	4.40175	0.903703
CAGL0I01408g	CYC1	315	-677724	ChrI	115213	114899	C	CAGL-IPF2074|CAGL-CDS5477.1|CAG60253.1		CAL0132740	CYC1	YJR048W	YJR048W	Anc_1.482	YJR048W	CYC1	Cytochrome c, isoform 1; electron carrier of the mitochondrial intermembrane space that transfers electrons from ubiquinone-cytochrome c oxidoreductase to cytochrome c oxidase during cellular respiration; mutations in human homolog cause insulin-responsive hyperglycemia; CYC1 has a paralog, CYC7, that arose from the whole genome duplication			mito	518	974	424	727	495.532	913.659		704.595	4.36517	0.882677
CAGL0F03685g		1356	132164	ChrF	359086	357731	C	CAGL-IPF1740|CAGL-CDS2385.1|CAG59054.1		CAL0130930	COX10	YPL172C	YPL172C	Anc_8.710	YPL172C	COX10	Heme A:farnesyltransferase; catalyzes the first step in the conversion of protoheme to the heme A prosthetic group required for cytochrome c oxidase activity; human ortholog is associated with mitochondrial disorders			mito	427	814	331	605	398.37	762.227		580.299	4.34046	0.936111
CAGL0K03377g		2937	51106	ChrK	310294	307358	C	CAGL-IPF2196|CAGL-CDS0474.1|CAG61332.1		CAL0133829	YMR102C		YMR102C	Anc_2.450	YMR102C		Protein of unknown function; transcription is activated by paralogous transcription factors Yrm1p and Yrr1p along with genes involved in multidrug resistance; mutant shows increased resistance to azoles; not an essential gene; YMR102C has a paralog, DGR2, that arose from the whole genome duplication	dup			457	978	495	741	504.473	923.856		714.164	4.33555	0.872892
CAGL0F00253g		1455	-194404	ChrF	32568	31114	C	CAGL-IPF3801|CAGL-CDS2165.1|CAG58909.1		CAL0129661		YKL211C	YKL211C	Anc_1.532	YKL211C	TRP3	Indole-3-glycerol-phosphate synthase; forms bifunctional hetero-oligomeric anthranilate synthase:indole-3-glycerol phosphate synthase enzyme complex with Trp2p				847	1444	694	1120	810.017	1378.76		1094.39	4.33168	0.767347
CAGL0K01243g		465	-140656	ChrK	116832	117296	W	CAGL-IPF5112|CAGL-CDS4790.1|CAG61239.1		CAL0134315	MRPL25	YGR076C	YGR076C	Anc_3.137	YGR076C	MRPL25	Mitochondrial ribosomal protein of the large subunit; mutation confers increased replicative lifespan			mito	341	694	414	714	401.477	766.047		583.762	4.33073	0.932116
CAGL0M11726g		441	116919	ChrM	1166748	1166308	C	CAGL-IPF6265|CAGL-CDS4878.1|CAG62831.1		CAL0136375	CCW12		YLR110C	Anc_8.301	YLR110C	CCW12	Cell wall mannoprotein; plays a role in maintenance of newly synthesized areas of cell wall; localizes to periphery of small buds, septum region of larger buds, and shmoo tip; CCW12 has a paralog, YDR134C, that arose from the whole genome duplication	dup			2221	3700	2038	2679	2243.61	3419.55		2831.58	4.28566	0.607987		0
CAGL0M08932g		633	-159377	ChrM	889916	890548	W	CAGL-IPF8170|CAGL-CDS4365.1|CAG62710.1		CAL0136321	YDR476C	YDR476C	YDR476C	Anc_5.610	YDR476C		Putative protein of unknown function; green fluorescent protein (GFP)-fusion protein localizes to the endoplasmic reticulum; YDR476C is not an essential gene				544	902	485	891	542.418	973.681		758.049	4.27256	0.844045
CAGL0I05016g	TRP2	1521	-332001	ChrI	461539	460019	C	CAGL-IPF1314|CAGL-CDS2037.1|CAG60405.1		CAL0132266	TRP2	YER090W	YER090W	Anc_7.375	YER090W	TRP2	Anthranilate synthase; catalyzes the initial step of tryptophan biosynthesis, forms multifunctional hetero-oligomeric anthranilate synthase:indole-3-glycerol phosphate synthase enzyme complex with Trp3p				2399	3866	2183	2936	2413.16	3653.03		3033.09	4.27132	0.598171
CAGL0M09614g		693	-93588	ChrM	955675	956367	W	CAGL-IPF9047|CAGL-CDS4172.1|CAG62741.1		CAL0137381	AIM36	YMR157C	YMR157C	Anc_2.358	YMR157C	AIM36	Protein of unknown function; null mutant displays reduced respiratory growth and elevated frequency of mitochondrial genome loss; the authentic, non-tagged protein is detected in purified mitochondria in high-throughput studies			mito	314	638	303	544	326.317	638.512		482.414	4.20856	0.968442
CAGL0L04158g		2799	-497918	ChrL	490663	487865	C	CAGL-IPF8108|CAGL-CDS0551.1|CAG61925.1		CAL0135232	FAR11	YNL127W	YNL127W	Anc_2.143	YNL127W	FAR11	Protein involved in recovery from cell cycle arrest; acts in response to pheromone; also involved in regulation of intra-S DNA damage checkpoint and autophagy; is essential for dephosphorylation of Atg13p; interacts with Far3p, Far7p, Far8p, Far9p, Far10p and with the phosphatases Pph21p, Pph22p and Pph3p; has similarity to the N- and C-termini of N. crassa HAM-2; similar to human Fam40A and Fam4…				278	628	308	504	311.094	610.092		460.593	4.15242	0.971676
CAGL0I06270g		285	-189324	ChrI	603598	603314	C	CAGL-IPF14675|CAG60460.1		CAL0132306	QCR8	YJL166W	YJL166W	Anc_1.177	YJL166W	QCR8	Subunit 8 of ubiquinol cytochrome-c reductase (Complex III); Complex III is a component of the mitochondrial inner membrane electron transport chain; oriented facing the intermembrane space; expression is regulated by Abf1p and Cpf1p			mito	649	1089	497	849	601.583	1042.59		822.087	4.11847	0.793334
CAGL0K02849g		1347	-1031	ChrK	257362	256016	C	CAGL-IPF2228|CAGL-CDS2411.1|CAG61310.1		CAL0134585		YKR003W	YHR001W	Anc_2.513	YHR001W	OSH7	Oxysterol-binding protein; part of family with seven members in S. cerevisiae; family members have overlapping, redundant functions in sterol metabolism and collectively perform a function essential for viability; OSH7 has a paralog, OSH6, that arose from the whole genome duplication				542	968	485	800	541.418	953.4		747.409	4.11391	0.81634
CAGL0I06941g		1062	-122592	ChrI	670718	669657	C	CAGL-IPF1463|CAGL-CDS3126.1|CAG60488.1		CAL0132710	EDC1	YGL222C	YGL222C	Anc_3.533	YGL222C	EDC1	RNA-binding protein that activates mRNA decapping directly; binds to mRNA substrate and enhances activity of decapping proteins Dcp1p and Dcp2p; has a role in translation during heat stress; protein becomes more abundant and forms cytoplasmic foci in response to DNA replication stress; EDC1 has a paralog, EDC2, that arose from the whole genome duplication				521	1128	354	449	458.147	827.889		643.018	4.09715	0.853628
CAGL0C01881g		3000	-224353	ChrC	196299	199298	W	CAGL-IPF1101|CAGL-CDS0446.1|CAG58163.1		CAL0127564	BOI1		YBL085W	Anc_7.413	YBL085W	BOI1	Protein implicated in polar growth; functionally redundant with Boi2p; interacts with bud-emergence protein Bem1p; contains an SH3 (src homology 3) domain and a PH (pleckstrin homology) domain; relocalizes from bud neck to cytoplasm upon DNA replication stress; BOI1 has a paralog, BOI2, that arose from the whole genome duplication	dup			1332	2163	1135	1629	1297.49	2036.28		1666.89	4.09174	0.650209
CAGL0D05808g		2331	-1383	ChrD	552040	554370	W	CAGL-IPF4891|CAGL-CDS0867.1|CAG58573.1		CAL0128511	DNM1	YLL001W	YLL001W	Anc_5.218	YLL001W	DNM1	Dynamin-related GTPase involved in mitochondrial organization; required for mitochondrial fission and morphology; assembles on the cytoplasmic face of mitochondrial tubules at sites at which division will occur; also participates in endocytosis and regulating peroxisome abundance				7356	10813	6495	8175	7286.97	10194		8740.47	4.03499	0.484323
CAGL0H10296g		1122	50398	ChrH	1006021	1004900	C	CAGL-IPF11|CAGL-CDS2947.1|CAG60178.1		CAL0129678	MSS2	YDL107W	YDL107W	Anc_2.333	YDL107W	MSS2	Peripherally bound inner membrane protein of the mitochondrial matrix; involved in membrane insertion of C-terminus of Cox2p, interacts genetically and physically with Cox18p			mito	486	899	350	579	438.425	789.505		613.965	4.01071	0.848617
CAGL0L12210g		8946	332556	ChrL	1324210	1315265	C	CAGL-IPF8321|CAGL-CDS0008.1|CAG62273.1		CAL0135282	CSF1	YLR087C	YLR087C	Anc_8.260	YLR087C	CSF1	Protein required for fermentation at low temperature; the authentic, non-tagged protein is detected in highly purified mitochondria in high-throughput studies				228	449	307	559	285.538	552.794		419.166	3.93364	0.953058
CAGL0L09174g		1284	9917	ChrL	997740	996457	C	CAGL-IPF7478|CAGL-CDS2595.1|CAG62144.1		CAL0135986		YFR005C	YFR005C	Anc_8.097	YFR005C	SAD1	Conserved zinc-finger domain protein involved in pre-mRNA splicing; required for assembly of U4 snRNA into the U4/U6 particle				644	1291	557	701	632.413	1056.94		844.675	3.87851	0.740947
CAGL0C04257g		1416	-7257	ChrC	415602	414187	C	CAGL-IPF904|CAGL-CDS2247.1|CAG58267.1		CAL0127464	COQ1	YBR003W	YBR003W	Anc_3.202	YBR003W	COQ1	Hexaprenyl pyrophosphate synthetase; catalyzes the first step in ubiquinone (coenzyme Q) biosynthesis			mito	1078	1755	953	1348	1069.39	1667.75		1368.57	3.84236	0.641116
CAGL0D03344g		5364	-208311	ChrD	348958	343595	C	CAGL-IPF4756|CAGL-CDS0052.1|CAG58473.1		CAL0128059	UBR2	YLR024C	YLR024C	Anc_5.191	YLR024C	UBR2	Cytoplasmic ubiquitin-protein ligase (E3); required for ubiquitylation of Rpn4p; mediates formation of a Mub1p-Ubr2p-Rad6p complex				965	1283	775	1365	914.013	1441.71		1177.86	3.78735	0.657493
CAGL0D04312g		2895	-130659	ChrD	425376	422482	C	CAGL-IPF4682|CAGL-CDS0490.1|CAG58514.1		CAL0128309		YMR080C	YMR080C	Anc_2.489	YMR080C	NAM7	ATP-dependent RNA helicase of the SFI superfamily; involved in nonsense mediated mRNA decay; required for efficient translation termination at nonsense codons and targeting of NMD substrates to P-bodies; binds to the small ribosomal subunit via an interaction with Rps26; forms cytoplasmic foci upon DNA replication stress				802	1228	639	1022	756.965	1213.38		985.173	3.72977	0.680735
CAGL0D01958g		546	-350140	ChrD	204175	204720	W	CAGL-IPF4822|CAGL-CDS4590.1|CAG58410.1		CAL0128155	SDH3	YMR118C	YKL141W	Anc_2.423	YKL141W	SDH3	Subunit of succinate dehydrogenase and of TIM22 translocase; functions as \ cytochrome b subunit of succinate dehydrogenase, which couples oxidation of succinate to transfer of electrons to ubiquinone as part of the TCA cycle and the mitochondrial respiratory chain; also required for mitochondrial inner membrane protein import as part of the TIM22 complex; SDH3 has a paralog, SHH3, that arose fro…			mito	1880	2537	1766	2615	1922.01	2800.58		2361.3	3.69268	0.543109
CAGL0M11462g		1161	80215	ChrM	1130404	1129244	C	CAGL-IPF6242|CAGL-CDS2859.1|CAG62819.1		CAL0136795	ICT1	YLR099C	YLR099C	Anc_8.284	YLR099C	ICT1	Lysophosphatidic acid acyltransferase; responsible for enhanced phospholipid synthesis during organic solvent stress; null displays increased sensitivity to Calcofluor white; highly expressed during organic solvent stress; ICT1 has a paralog, ECM18, that arose from the whole genome duplication	dup			2517	4185	2370	2708	2576.03	3679.03		3127.53	3.69229	0.514175
CAGL0M06347g		945	-388849	ChrM	660288	661232	W	CAGL-IPF6150|CAGL-CDS3477.1|CAG62599.1		CAL0137463	YPC1	YPL087W	YBR183W	Anc_8.564	YBR183W	YPC1	Alkaline ceramidase; also has reverse (CoA-independent) ceramide synthase activity; catalyzes both breakdown and synthesis of phytoceramide; overexpression confers fumonisin B1 resistance; YPC1 has a paralog, YDC1, that arose from the whole genome duplication	dup			690	985	535	944	643.192	1046.21		844.702	3.67391	0.701853
CAGL0H03465g		396	-631736	ChrH	323129	323524	W	CAGL-IPF11008|CAGL-CDS5009.1|CAG59877.1		CAL0130643							#N/A				510	879	394	626	474.867	807.023		640.945	3.66824	0.765086
CAGL0L09372g		315	32730	ChrL	1020069	1019755	C	Novel_proteincoding39		CAL0000202671							#N/A				688	1107	618	945	688.299	1107.8		898.048	3.66092	0.686587
CAGL0F03069g	CAD1	1461	76135	ChrF	303110	301650	C	CAGL-IPF1791|CAGL-CDS2143.1|CAG59027.1|YAP2		CAL0130892	CAD1		YDR423C	Anc_5.528	YDR423C	CAD1	AP-1-like basic leucine zipper (bZIP) transcriptional activator; involved in stress responses, iron metabolism, and pleiotropic drug resistance; controls a set of genes involved in stabilizing proteins; binds consensus sequence TTACTAA; CAD1 has a paralog, YAP1, that arose from the whole genome duplication	dup			533	720	400	795	489.7	826.473		658.086	3.65193	0.755069		0
CAGL0J10120g		2433	774534	ChrJ	990695	993127	W	CAGL-IPF9072|CAGL-CDS0785.1|CAG61101.1		CAL0133596	FKH2		YNL068C	Anc_2.230	YNL068C	FKH2	Forkhead family transcription factor; plays a major role in the expression of G2/M phase genes; positively regulates transcriptional elongation; facilitates clustering and activation of early-firing replication origins; negative role in chromatin silencing at HML and HMR; substrate of the Cdc28p/Clb5p kinase; relocalizes to the cytosol in response to hypoxia; FKH2 has a paralog, FKH1, that arose …	dup			434	851	424	594	453.532	774.287		613.909	3.64691	0.771664		0
CAGL0I06831g		1512	-129486	ChrI	664049	662538	C	CAGL-IPF1456|CAGL-CDS2060.1|CAG60484.1		CAL0132496	COX15	YER141W	YER141W	Anc_8.183	YER141W	COX15	Protein required for the hydroxylation of heme O to form heme A; heme A is an essential prosthetic group for cytochrome c oxidase			mito	410	667	290	535	367.095	647.743		507.419	3.62518	0.819267
CAGL0F03311g		3138	102923	ChrF	330736	327599	C	CAGL-IPF1769|CAGL-CDS0383.1|CAG59038.1		CAL0131368	KSP1	YHR082C	YHR082C	Anc_5.376	YHR082C	KSP1	Serine/threonine protein kinase; associates with TORC1 and likely involved in TOR signaling cascades; negative regulator of autophagy; nuclear translocation required for haploid filamentous growth; regulates filamentous growth induced nuclear translocation of Bcy1p, Fus3p, and Sks1p; overproduction causes allele-specific suppression of prp20-10; protein abundance increases in response to DNA repl…				1201	1799	884	1298	1092.56	1660.48		1376.52	3.6246	0.603884
CAGL0E02739g		1032	13555	ChrE	260054	259023	C	CAGL-IPF7983|CAGL-CDS3220.1|CAG58727.1		CAL0128610	SGT2	YOR007C	YOR007C	Anc_6.021	YOR007C	SGT2	Glutamine-rich cytoplasmic cochaperone; serves as a scaffold bringing together Get4, Get5p, and other TRC complex members that are required to mediate posttranslational insertion of tail-anchored proteins into the ER membrane; interacts with the prion domain of Sup35p; amyloid sensor; plays a role in targeting chaperones to prion aggregates; has similarity to human cochaperone SGT; forms cytoplas…				1603	2250	1471	2129	1619.64	2372.53		1996.09	3.61242	0.550752
CAGL0B03608g		210	-90300	ChrB	360774	360983	W	Novel_proteincoding48		CAL0000206109							#N/A				362	729	321	462	360.315	636.001		498.158	3.6037	0.819768
CAGL0L08998g		1317	-3155	ChrL	983369	984685	W	CAGL-IPF7487|CAGL-CDS2490.1|CAG62137.1		CAL0135330		YFL001W	YFL001W	Anc_8.088	YFL001W	DEG1	tRNA:pseudouridine synthase; introduces pseudouridines at position 38 or 39 in tRNA, important for maintenance of translation efficiency and normal cell growth, localizes to both the nucleus and cytoplasm; non-essential for viability				619	1018	656	974	674.908	1080.28		877.592	3.59367	0.678639
CAGL0J03916g		1302	156390	ChrJ	373116	374417	W	CAGL-IPF6864|CAGL-CDS2530.1|CAG60824.1		CAL0133240	HES1	YPL145C	YOR237W	Anc_8.658	YOR237W	HES1	Protein implicated in the regulation of ergosterol biosynthesis; one of a seven member gene family with a common essential function and non-essential unique functions; similar to human oxysterol binding protein (OSBP); HES1 has a paralog, KES1, that arose from the whole genome duplication	dup			445	778	446	690	471.253	793.995		632.624	3.59287	0.752628
CAGL0H09152g		2334	-58174	ChrH	898055	895722	C	CAGL-IPF92|CAGL-CDS0864.1|CAG60130.1		CAL0130128	PTK1	YKL198C	YKL198C	Anc_1.507	YKL198C	PTK1	Putative serine/threonine protein kinase; regulates spermine uptake; involved in polyamine transport; possible mitochondrial protein; PTK1 has a paralog, PTK2, that arose from the whole genome duplication	dup			19609	26925	18374	21991	20012.3	26339.2		23175.7	3.59133	0.396329
CAGL0C01325g		450	-281867	ChrC	140060	140509	W	CAGL-IPF11925|CAR58004.1		CAL0127410	COX5B	YIL111W	YIL111W	Anc_2.258	YIL111W	COX5B	Subunit Vb of cytochrome c oxidase; cytochrome c oxidase is the terminal member of the mitochondrial inner membrane electron transport chain; Cox5Bp is predominantly expressed during anaerobic growth while its isoform Va (Cox5Ap) is expressed during aerobic growth; COX5B has a paralog, COX5A, that arose from the whole genome duplication			mito	413	744	356	557	405.258	699.124		552.191	3.58592	0.786707
CAGL0H02491g		186	-727682	ChrH	227288	227473	W	CAGL-IPF13442|CAR57987.1		CAL0131848	COX7	YMR256C	YMR256C	Anc_8.807	YMR256C	COX7	Subunit VII of cytochrome c oxidase (Complex IV); Complex IV is the terminal member of the mitochondrial inner membrane electron transport chain			mito	786	1185	593	939	723.411	1143.28		933.348	3.56119	0.660296
CAGL0C03575g		2007	-64946	ChrC	358209	356203	C	CAGL-IPF954|CAGL-CDS1202.1|CAG58238.1		CAL0127608	AGA1	YNR044W	YNR044W	Anc_6.367	YNR044W	AGA1	Anchorage subunit of a-agglutinin of a-cells; highly O-glycosylated protein with N-terminal secretion signal and C-terminal signal for addition of GPI anchor to cell wall, linked to adhesion subunit Aga2p via two disulfide bonds; AGA1 has a paralog, FIG2, that arose from the whole genome duplication				2516	3926	2280	2729	2525.54	3561.83		3043.68	3.54422	0.496027
CAGL0K05291g	SRO7	3147	260323	ChrK	516470	519616	W	CAGL-IPF3983|CAGL-CDS0379.1|CAG61416.1		CAL0133805	SRO7	YPR032W	YPR032W	Anc_7.442	YPR032W	SRO7	Effector of Rab GTPase Sec4p; forms a complex with Sec4p and t-SNARE Sec9p; involved in exocytosis and docking and fusion of post-Golgi vesicles with plasma membrane; homolog of Drosophila lgl tumor suppressor; SRO7 has a paralog, SRO77, that arose from the whole genome duplication				369	765	366	490	388.813	670.395		529.604	3.53061	0.785935
CAGL0A01430g	TRP5	2124	71069	ChrA	147313	149436	W	CAGL-IPF3035|CAGL-CDS1069.1|CAG57722.1		CAL0126805	TRP5	YGL026C	YGL026C	Anc_4.092	YGL026C	TRP5	Tryptophan synthase; catalyzes the last step of tryptophan biosynthesis; regulated by the general control system of amino acid biosynthesis				1394	2104	1305	1767	1422.93	2087.58		1755.25	3.52244	0.552968
CAGL0E03113g		972	43903	ChrE	290372	289401	C	CAGL-IPF2411|CAGL-CDS3377.1|CAG58743.1		CAL0128646	RSR1	YGR152C	YGR152C	Anc_4.073	YGR152C	RSR1	GTP-binding protein of the Ras superfamily; required for bud site selection, morphological changes in response to mating pheromone, and efficient cell fusion; localized to the plasma membrane; significantly similar to mammalian Rap GTPases				3743	5417	3273	4049	3690.65	5080.19		4385.42	3.50534	0.461007
CAGL0J01023g		780	-116928	ChrJ	100838	100059	C	CAGL-IPF7893|CAGL-CDS3934.1|CAG60703.1		CAL0133650	TAD2	YJL035C	YJL035C	Anc_5.238	YJL035C	TAD2	Subunit of tRNA-specific adenosine-34 deaminase; forms a heterodimer with Tad3p that converts adenosine to inosine at the wobble position of several tRNAs				239	507	237	363	252.154	467.037		359.595	3.46204	0.889233
CAGL0C02761g		642	-144325	ChrC	278147	277506	C	CAGL-IPF1019|CAGL-CDS4316.1|CAG58203.1		CAL0127542	ERP2	YAL007C	YAL007C	Anc_7.108	YAL007C	ERP2	Member of the p24 family involved in ER to Golgi transport; similar to Emp24p and Erv25p; forms a heterotrimeric complex with Erp1p, Emp24p, and Erv25p; localized to COPII-coated vesicles; ERP2 has a paralog, ERP4, that arose from the whole genome duplication				954	1330	800	1246	922.4	1395.53		1158.97	3.42581	0.597352		0
CAGL0C00385g		2562	-383618	ChrC	37253	39814	W	CAGL-IPF6636|CAGL-CDS0683.1|CAG58102.1		CAL0127376	IOC2	YLR095C	YLR095C	Anc_8.278	YLR095C	IOC2	Subunit of the Isw1b complex; exhibits nucleosome-stimulated ATPase activity and acts within coding regions to coordinate transcription elongation with termination and processing; contains a PHD finger motif; other complex members are Isw1p and Ioc4p				368	726	402	553	408.311	687.782		548.046	3.42005	0.752282
CAGL0C02959g		2670	-129037	ChrC	294449	291780	C	CAGL-IPF1005|CAGL-CDS0618.1|CAG58212.1		CAL0127310	VPH1	YOR270C	YOR270C	Anc_8.718	YOR270C	VPH1	Subunit a of vacuolar-ATPase V0 domain; one of two isoforms (Vph1p and Stv1p); Vph1p is located in V-ATPase complexes of the vacuole while Stv1p is located in V-ATPase complexes of the Golgi and endosomes; relative distribution to the vacuolar membrane decreases upon DNA replication stress				232	423	168	322	210.324	401.031		305.678	3.39928	0.9311
CAGL0L11770g		4431	271454	ChrL	1256421	1260851	W	CAGL-IPF4261|CAGL-CDS0114.1|CAG62253.1		CAL0135304	CHD1	YER164W	YER164W	Anc_8.228	YER164W	CHD1	Chromatin remodeler that regulates various aspects of transcription; acts in in conjunction with Isw1b to regulate chromatin structure and maintain chromatin integrity during transcription elongation by RNAP II by preventing trans-histone exchange over coding regions; contains a chromo domain, a helicase domain and a DNA-binding domain; component of both the SAGA and SLIK complexes				282	459	173	357	238.101	439.524		338.812	3.36386	0.884364		0
CAGL0L12408g		1695	354752	ChrL	1342781	1341087	C	CAGL-IPF8608|CAGL-CDS1706.1|CAG62282.1		CAL0135228	TRM44	YPL030W	YPL030W	Anc_8.481	YPL030W	TRM44	tRNA(Ser) Um(44) 2'-O-methyltransferase; involved in maintaining levels of the tRNA-Ser species tS(CGA) and tS(UGA); conserved among metazoans and fungi but there does not appear to be a homolog in plants; TRM44 is a non-essential gene				496	905	445	598	496.197	803.629		649.913	3.35054	0.695615
CAGL0F04213g		921	193688	ChrF	419473	420393	W	CAGL-IPF1698|CAGL-CDS3552.1|CAG59078.1		CAL0131198	PET9	YBR085W	YBL030C	Anc_3.316	YBL030C	PET9	Major ADP/ATP carrier of the mitochondrial inner membrane; exchanges cytosolic ADP for mitochondrially synthesized ATP; also imports heme and ATP; phosphorylated; required for viability in many lab strains that carry a sal1 mutation; PET9 has a paralog, AAC3, that arose from the whole genome duplication			mito	220	404	150	292	194.325	373.966		284.145	3.34704	0.944436
CAGL0K00913g		2841	-164953	ChrK	94187	91347	C	CAGL-IPF5141|CAGL-CDS0521.1|CAG61225.1		CAL0134619	ADE3	YGR204W	YGR204W	Anc_5.134	YGR204W	ADE3	Cytoplasmic trifunctional enzyme C1-tetrahydrofolate synthase; involved in single carbon metabolism and required for biosynthesis of purines, thymidylate, methionine, and histidine; null mutation causes auxotrophy for adenine and histidine				701	1153	721	979	752.015	1150.7		951.36	3.32841	0.613683
CAGL0L05104g		2034	-409142	ChrL	579056	577023	C	CAGL-IPF4572|CAGL-CDS1174.1|CAG61966.1		CAL0135120	SMY1	YKL079W	YKL079W	Anc_2.633	YKL079W	SMY1	Protein that interacts with Myo2p; proposed to be involved in exocytosis; N-terminal domain is related to the motor domain of kinesins				279	526	295	457	304.373	531.573		417.973	3.31666	0.804431
CAGL0J02486g		3708	26121	ChrJ	245351	241644	C	CAGL-IPF6508|CAGL-CDS0218.1|CAG60762.1		CAL0132818	SSM4	YIL030C	YIL030C	Anc_7.198	YIL030C	SSM4	Ubiquitin-protein ligase involved in ER-associated protein degradation; located in the ER/nuclear envelope; ssm4 mutation suppresses mRNA instability caused by an rna14 mutation				1647	2521	1364	1689	1582.2	2250.41		1916.31	3.30343	0.508254
CAGL0M05027g		2229	-504047	ChrM	544448	546676	W	CAGL-IPF7201|CAGL-CDS0965.1|CAG62542.1		CAL0136589	BCH1	YOR299W	YMR237W	Anc_8.772	YMR237W	BCH1	Member of the ChAPs family (Chs5p-Arf1p-binding proteins); members include Bch1p, Bch2p, Bud7p, and Chs6p; ChAPs family proteins form the exomer complex with Chs5p to mediate export of specific cargo proteins from the Golgi to the plasma membrane; may interact with ribosomes; protein abundance increases and forms cytoplasmic foci in response to DNA replication stress; BCH1 has a paralog, BUD7, th…				751	1258	928	1199	892.004	1332.01		1112.01	3.28009	0.578488
CAGL0M01496g		2856	-877136	ChrM	173900	171045	C	CAGL-IPF6331|CAGL-CDS0512.1|CAG62386.1		CAL0136399	SXM1	YDR395W	YDR395W	Anc_5.488	YDR395W	SXM1	Nuclear transport factor (karyopherin); involved in protein transport between the cytoplasm and nucleoplasm; similar to Nmd5p, Cse1p, Lph2p, and the human cellular apoptosis susceptibility protein, CAS1				287	490	221	390	267.265	474.345		370.805	3.26082	0.827663
CAGL0K00170g	EPA22	4272	-241444	ChrK	14140	18411	W	Cagl0K.mRNA.at.517.p|CAR58049.1|CAGL0K00132g		CAL0134413							#N/A				232	456	181	296	217.546	402.308		309.927	3.25627	0.886983
CAGL0M07986g		327	-254203	ChrM	795569	795243	C	CAGL-IPF8039|CAGL-CDS5387.1|CAG62669.1		CAL0136419	PET191	YJR034W	YJR034W	Anc_1.458	YJR034W	PET191	Protein required for assembly of cytochrome c oxidase; exists as an oligomer; described as both an integral mitochondrial inner membrane protein facing the intermembrane space (IMS) and as a soluble IMS protein; contains a twin Cx9C motif; imported into the IMS via the MIA import machinery			mito	196	378	133	248	172.882	335.204		254.043	3.23162	0.955256
CAGL0I04312g		2856	-408998	ChrI	385209	382354	C	CAGL-IPF5925|CAGL-CDS0511.1|CAG60373.1		CAL0132254	PMR1		YGL167C	Anc_8.112	YGL167C	PMR1	High affinity Ca2+/Mn2+ P-type ATPase; required for Ca2+ and Mn2+ transport into Golgi; involved in Ca2+ dependent protein sorting and processing; mutations in human homolog ATP2C1 cause acantholytic skin condition Hailey-Hailey disease	dup			369	589	363	589	387.147	640.36		513.753	3.22665	0.726002
CAGL0I08415g		3927	29956	ChrI	820773	824699	W	CAGL-IPF4347|CAGL-CDS0186.1|CAG60551.1		CAL0130304	MMS1	YPR164W	YPR164W	Anc_7.519	YPR164W	MMS1	Subunit of E3 ubiquitin ligase complex involved in replication repair; stabilizes protein components of the replication fork such as the fork-pausing complex and leading strand polymerase, preventing fork collapse and promoting efficient recovery during replication stress; regulates Ty1 transposition; involved with Rtt101p in nonfunctional rRNA decay	dup			1789	2600	1572	1997	1768.75	2470.24		2119.49	3.20275	0.481926
CAGL0L05236g	MDH1	1011	-400477	ChrL	587210	586200	C	CAGL-IPF4565|CAGL-CDS3282.1|CAG61972.1		CAL0136024	MDH1	YKL085W	YKL085W	Anc_2.641	YKL085W	MDH1	Mitochondrial malate dehydrogenase; catalyzes interconversion of malate and oxaloacetate; involved in the tricarboxylic acid (TCA) cycle; phosphorylated			mito	297	552	290	433	310.595	530.522		420.558	3.19185	0.772377
CAGL0L04334g		918	-480813	ChrL	505910	506827	W	CAGL-IPF8118|CAGL-CDS3569.1|CAG61933.1		CAL0135714	PET123	YOR158W	YOR158W	Anc_5.505	YOR158W	PET123	Mitochondrial ribosomal protein of the small subunit; PET123 exhibits genetic interactions with PET122, which encodes a COX3 mRNA-specific translational activator			mito	456	780	422	597	463.421	740.543		601.982	3.17496	0.676261
CAGL0E06666g	EPA2	4263	426577	ChrE	674692	670430	C	CAGL-IPF5969|CAGL-CDS0135.1|CAG58899.1		CAL0128698							#N/A				285	482	260	436	287.93	497.278		392.604	3.1745	0.788334		0
CAGL0H07227g		1359	-244982	ChrH	710760	709402	C	CAGL-IPF242|CAGL-CDS2372.1|CAG60044.1		CAL0131806	OMS1	YDR316W	YDR316W	Anc_5.344	YDR316W	OMS1	Protein integral to the mitochondrial membrane; has a conserved methyltransferase motif; multicopy suppressor of respiratory defects caused by OXA1 mutations			mito	468	876	470	590	496.085	784.445		640.265	3.16849	0.661085
CAGL0B02123g		828	-254807	ChrB	196785	195958	C	CAGL-IPF5216|CAGL-CDS3794.1|CAG57962.1		CAL0127850	PET54	YGR222W	YGR222W	Anc_5.106	YGR222W	PET54	Mitochondrial inner membrane protein; binds to the 5' UTR of the COX3 mRNA to activate its translation together with Pet122p and Pet494p; also binds to the COX1 Group I intron AI5 beta to facilitate exon ligation during splicing			mito	198	309	137	308	176.103	335.834		255.969	3.16066	0.931325
CAGL0F05863g		492	361213	ChrF	587703	587212	C	CAGL-IPF414|CAGL-CDS4708.1|CAG59150.1		CAL0129300	SDH4	YLR164W	YDR178W	Anc_8.377	YDR178W	SDH4	Membrane anchor subunit of succinate dehydrogenase; involved in coupling the oxidation of succinate to the transfer of electrons to ubiquinone as part of the TCA cycle and the mitochondrial respiratory chain; SDH4 has a paralog, SHH4, that arose from the whole genome duplication			mito	906	1239	802	1201	899.511	1323.69		1111.6	3.1599	0.557348
CAGL0F06017g	LYS7	720	375546	ChrF	602150	601431	C	CAGL-IPF428|CAGL-CDS4090.1|CAG59157.1		CAL0130932	CCS1	YMR038C	YMR038C	Anc_2.600	YMR038C	CCS1	Copper chaperone for superoxide dismutase Sod1p; involved in oxidative stress protection; Met-X-Cys-X2-Cys motif within the N-terminal portion is involved in insertion of copper into Sod1p under conditions of copper deprivation; protein abundance increases in response to DNA replication stress				209	454	227	318	231.599	414.189		322.894	3.1298	0.838663
CAGL0E04092g	SIT1	1938	149365	ChrE	394380	396317	W	CAGL-IPF2486|CAGL-CDS1290.1|CAG58784.1		CAL0129016	ARN1	YHL040C			YHL040C	ARN1	ARN family transporter for siderophore-iron chelates; responsible for uptake of iron bound to ferrirubin, ferrirhodin, and related siderophores; protein increases in abundance and relocalizes to the vacuole upon DNA replication stress				2708	4056	2888	3283	2959.28	3951.2		3455.24	3.04854	0.417041
CAGL0E03157g	CYS4	1506	46006	ChrE	291237	292742	W	CAGL-IPF2416|CAGL-CDS2069.1|CAG58745.1		CAL0128738	CYS4	YGR155W	YGR155W	Anc_4.069	YGR155W	CYS4	Cystathionine beta-synthase; catalyzes synthesis of cystathionine from serine and homocysteine, the first committed step in cysteine biosynthesis; responsible for hydrogen sulfide generation; advances passage through START by promoting cell growth which requires catalytic activity, and reducing critical cell size independent of catalytic activity; mutations in human ortholog cause homocystinuria				266	480	277	416	287.874	484.568		386.221	3.0064	0.751264
CAGL0F01265g	YAP7	1872	-93584	ChrF	131725	133596	W	CAGL-IPF3723|CAGL-CDS1380.1|CAG58953.1|AP7		CAL0130852	YAP7	YOL028C	YOL028C	Anc_7.115	YOL028C	YAP7	Putative basic leucine zipper (bZIP) transcription factor; YAP7 has a paralog, YAP5, that arose from the whole genome duplication	dup			906	1112	717	1164	852.293	1238.52		1045.41	3.00487	0.539197		0
CAGL0I06875g		678	-126061	ChrI	666380	667057	W	CAGL-IPF1461|CAGL-CDS4204.1|CAG60486.1		CAL0132124	RTR1		YER139C	Anc_8.181	YER139C	RTR1	CTD phosphatase; dephosphorylates S5-P in the C-terminal domain of Rpo21p; has a cysteine-rich motif required for function and conserved in eukaryotes; shuttles between the nucleus and cytoplasm; RTR1 has a paralog, RTR2, that arose from the whole genome duplication	dup			332	650	330	417	350.315	570.154		460.234	3.00209	0.702698
CAGL0D05324g		2364	-43319	ChrD	512450	510087	C	CAGL-IPF4928|CAGL-CDS0842.1|CAG58552.1		CAL0128451		YBR255W	YBR255W	Anc_7.177	YBR255W	MTC4	Protein of unknown function; required for normal growth rate at 15 degrees C; green fluorescent protein (GFP)-fusion protein localizes to the cytoplasm in a punctate pattern; mtc4 is synthetically sick with cdc13-1				1000	1509	1107	1400	1115.94	1575.2		1345.57	2.96731	0.497277
CAGL0J07942g		3735	559372	ChrJ	774882	778616	W	CAGL-IPF6752|CAGL-CDS0215.1|CAG61004.1		CAL0132962	SIP3		YNL257C	Anc_1.100	YNL257C	SIP3	Transcription cofactor; acts through interaction with DNA-bound Snf1p; C-terminal region has a putative leucine zipper motif; potential Cdc28p substrate; SIP3 has a paralog, YSP1, that arose from the whole genome duplication	dup			217	364	128	251	180.604	329.961		255.282	2.9474	0.869463		0
CAGL0A04389g		468	355086	ChrA	432158	432625	W	CAGL-IPF1142|CAGL-CDS5748.1|CAG57851.2		CAL0126947	CMC2	YBL059C-A	YBL059C-A	Anc_7.382	YBL059C-A	CMC2	Protein involved in respiratory chain complex assembly or maintenance; protein of the mitochondrial intermembrane space; contains twin Cx9C motifs that can form coiled coil-helix-coiled-coil helix fold				93	194	83	177	93.6065	201.633		147.62	2.94418	1.10705
CAGL0C02453g		657	-174331	ChrC	247493	248149	W	CAGL-IPF1051|CAGL-CDS4260.1|CAG58189.1		CAL0127334	YPT31		YER031C	Anc_3.521	YER031C	YPT31	Rab family GTPase; involved in the exocytic pathway; mediates intra-Golgi traffic or the budding of post-Golgi vesicles from the trans-Golgi; YPT31 has a paralog, YPT32, that arose from the whole genome duplication	dup			2	30	7	45	5.8885	42.3475		24.118	2.93744	2.8463
CAGL0J09856g		534	748276	ChrJ	965919	965386	C	CAGL-IPF9271|CAGL-CDS4620.1|CAG61089.1		CAL0133744	MRPL36	YBR122C	YBR122C	Anc_3.383	YBR122C	MRPL36	Mitochondrial ribosomal protein of the large subunit; overproduction suppresses mutations in the COX2 leader peptide-encoding region				27	66	37	122	35.0535	105.431		70.2422	2.93198	1.58867
CAGL0D03278g		513	-215596	ChrD	338736	339248	W	CAGL-IPF4764|CAGL-CDS4666.1|CAG58470.1		CAL0128443	IRC25	YLR021W	YLR021W	Anc_5.199	YLR021W	IRC25	Component of a heterodimeric Poc4p-Irc25p chaperone; involved in assembly of alpha subunits into the 20S proteasome; may regulate formation of proteasome isoforms with alternative subunits under different conditions				98	283	166	224	142.213	273.652		207.933	2.93155	0.944289
CAGL0M07568g		498	-291250	ChrM	758607	758110	C	CAGL-IPF9606|CAGL-CDS4696.1|CAG62653.1		CAL0137045	UBC7	YMR022W	YMR022W	Anc_2.569	YMR022W	UBC7	Ubiquitin conjugating enzyme; involved in the ER-associated protein degradation pathway; requires Cue1p for recruitment to the ER membrane; proposed to be involved in chromatin assembly				244	491	264	354	269.652	453.767		361.709	2.92994	0.750853
CAGL0K07271g		2331	455739	ChrK	714624	712294	C	CAGL-IPF5356|CAGL-CDS0868.1|CAG61499.1		CAL0134497		YML006C	YML006C	Anc_5.526	YML006C	GIS4	CAAX box containing protein of unknown function; proposed to be involved in the RAS/cAMP signaling pathway				675	944	421	661	572.365	860.015		716.19	2.92033	0.587426
CAGL0J07502g		1299	509935	ChrJ	727961	726663	C	CAGL-IPF2382|CAGL-CDS2538.1|CAG60984.1		CAL0133230	YNL234W	YNL234W	YNL234W	Anc_2.009	YNL234W		Protein of unknown function with similarity to globins; has a functional heme-binding domain; mutant has aneuploidy tolerance; transcription induced by stress conditions; may be involved in glucose signaling or metabolism; regulated by Rgt1				989	1728	902	936	996.561	1413.03		1204.79	2.9196	0.50376
CAGL0G05313g		1554	437354	ChrG	498913	497360	C	CAGL-IPF5693|CAGL-CDS1972.1|CAG59518.1		CAL0130251	IPT1	YDR072C	YDR072C	Anc_8.193	YDR072C	IPT1	Inositolphosphotransferase; involved in synthesis of mannose-(inositol-P)2-ceramide (M(IP)2C), the most abundant sphingolipid; can mutate to resistance to the antifungals syringomycin E and DmAMP1 and to K. lactis zymocin				1732	2037	1588	2316	1749.13	2375.52		2062.33	2.91737	0.441601
CAGL0B04697g		555	2454	ChrB	453910	453356	C	CAGL-IPF672|CAGL-CDS4570.1|CAG58074.1		CAL0127880		YCL001W	YCL001W	Anc_1.417	YCL001W	RER1	Protein involved in retention of membrane proteins; including Sec12p, in the ER; localized to Golgi; functions as a retrieval receptor in returning membrane proteins to the ER				334	466	329	563	350.76	563.637		457.198	2.91637	0.684283
CAGL0J01485g		903	-78600	ChrJ	138326	139228	W	CAGL-IPF7850|CAGL-CDS3601.1|CAG60723.1		CAL0133588		YHL013C	YHL013C	Anc_2.548	YHL013C	OTU2	Protein of unknown function; may interact with ribosomes, based on co-purification experiments; member of the ovarian tumor-like (OTU) superfamily of predicted cysteine proteases; shows cytoplasmic localization; protein abundance increases in response to DNA replication stress				5001	6283	4005	5056	4726.28	6102.79		5414.53	2.89315	0.368764
CAGL0H09108g		1599	-65226	ChrH	889038	890636	W	CAGL-IPF97|CAGL-CDS1891.1|CAG60128.1		CAL0131950		YPL260W	YPL260W	Anc_7.125	YPL260W		Putative substrate of cAMP-dependent protein kinase (PKA); green fluorescent protein (GFP)-fusion protein localizes to the cytoplasm and nucleus; YPL260W is not an essential gene; protein abundance increases in response to DNA replication stress				1753	2052	1329	1998	1615.76	2196.83		1906.29	2.87728	0.44321
CAGL0M13585g		1404	288131	ChrM	1338441	1337038	C	CAGL-IPF6069|CAGL-CDS2272.1|CAG62914.1		CAL0136335	HER2	YMR293C	YMR293C	Anc_5.033	YMR293C	HER2	Subunit of the trimeric GatFAB AmidoTransferase(AdT) complex; involved in the formation of Q-tRNAQ; required for remodeling of ER caused by Hmg2p overexpression; similar to bacterial GatA glutamyl-tRNA amidotransferase				63	136	40	117	54.72	137.504		96.1118	2.87566	1.32933
CAGL0L08602g		1143	-48323	ChrL	939430	938288	C	CAGL-IPF7564|CAGL-CDS2902.1|CAG62120.1		CAL0135376	PPX1	YHR201C	YHR201C	Anc_4.377	YHR201C	PPX1	Exopolyphosphatase; hydrolyzes inorganic polyphosphate (poly P) into Pi residues; located in the cytosol, plasma membrane, and mitochondrial matrix				173	340	164	259	178.602	322.644		250.623	2.86994	0.853197
CAGL0K01353g		558	-135474	ChrK	121967	122524	W	CAGL-IPF5101|CAGL-CDS4559.1|CAG61244.1		CAL0134291	NPC2	YDL046W	YDL046W	Anc_3.143	YDL046W	NPC2	Functional homolog of human NPC2/He1; human NPC2 is a cholesterol-binding protein whose deficiency causes Niemann-Pick type C2 disease involving retention of cholesterol in lysosomes				504	773	382	554	465.201	711.867		588.534	2.8595	0.613754
CAGL0G07513g		972	652291	ChrG	713559	712588	C	CAGL-IPF8272|CAGL-CDS3388.1|CAG59615.1		CAL0130318	ATP12	YJL180C	YJL180C	Anc_1.158	YJL180C	ATP12	Assembly factor for the F1 sector of mitochondrial F1F0 ATP synthase; conserved protein; required for the assembly of alpha and beta subunits into the F1 sector of the mitochondrial F1F0 ATP synthase; mutation of human ATP12 reduces active ATP synthase levels and is associated with the disorder ATPAF2 deficiency				5	40	5	36	6.2775	42.078		24.1778	2.83666	2.7448
CAGL0K09680g		465	691901	ChrK	949389	949853	W	CAGL-IPF3171|CAGL-CDS4786.1|CAG61602.1		CAL0134691	FYV6	YNL133C	YNL133C	Anc_2.134	YNL133C	FYV6	Protein of unknown function; required for survival upon exposure to K1 killer toxin; proposed to regulate double-strand break repair via non-homologous end-joining				485	678	336	550	430.148	662.025		546.087	2.82448	0.622053
CAGL0E02849g		2148	24243	ChrE	271300	269153	C	CAGL-IPF7995|CAGL-CDS1044.1|CAG58732.1		CAL0128956	SCT1	YBL011W	YBL011W	Anc_4.096	YBL011W	SCT1	Glycerol 3-phosphate/dihydroxyacetone phosphate sn-1 acyltransferase; dual substrate-specific acyltransferase of the glycerolipid biosynthesis pathway; prefers 16-carbon fatty acids; similar to Gpt2p; gene is constitutively transcribed				708	1086	673	869	728.851	1052.8		890.826	2.82203	0.530534
CAGL0J05478g		381	305982	ChrJ	523169	523549	W	CAGL-IPF7929|CAGL-CDS5101.1|CAG60894.1		CAL0133188	SWS2	YNL081C	YNL081C	Anc_2.213	YNL081C	SWS2	Putative mitochondrial ribosomal protein of the small subunit; has similarity to E. coli S13 ribosomal protein; participates in controlling sporulation efficiency				106	236	121	202	121.216	237.271		179.243	2.81635	0.968962
CAGL0H08349g		1953	-137097	ChrH	818942	816990	C	CAGL-IPF159|CAGL-CDS1266.1|CAG60095.1		CAL0130060		YDR049W	YDR049W	Anc_3.293	YDR049W	VMS1	Component of a Cdc48p-complex involved in protein quality control; exhibits cytosolic and ER-membrane localization, with Cdc48p, during normal growth, and contributes to ER-associated degradation (ERAD) of specific substrates at a step after their ubiquitination; forms a mitochondrially-associated complex with Cdc48p and Npl4p under oxidative stress that is required for ubiquitin-mediated mitocho…				384	825	546	568	496.303	746.064		621.184	2.79028	0.588078
CAGL0M03883g		624	-612381	ChrM	437539	436916	C	CAGL-IPF6775|CAGL-CDS4390.1|CAG62491.1		CAL0136957	MRPS18	YNL306W	YNL306W	Anc_3.042	YNL306W	MRPS18	Mitochondrial ribosomal protein of the small subunit; essential for viability, unlike most other mitoribosomal proteins				66	146	90	182	83.995	180.561		132.278	2.78888	1.10411
CAGL0J02266g		759	5729	ChrJ	223485	222727	C	CAGL-IPF6489|CAGL-CDS4586.1|CAG60752.1		CAL0133562		YER007C-A	YER007C-A	Anc_7.152	YER007C-A	TMA20	Protein of unknown function that associates with ribosomes; has a putative RNA binding domain; interacts with Tma22p; null mutant exhibits translation defects; has homology to human oncogene MCT-1; protein abundance increases in response to DNA replication stress				724	1130	645	806	721.298	1037.91		879.605	2.7821	0.525019
CAGL0E01969g		1641	-49826	ChrE	196978	195338	C	CAGL-IPF8410|CAGL-CDS1795.1|CAG58694.1		CAL0128924	SMF1	YOL122C	YOL122C	Anc_3.050	YOL122C	SMF1	Divalent metal ion transporter; broad specificity for di-valent and tri-valent metals; post-translationally regulated by levels of metal ions; member of the Nramp family of metal transport proteins				1585	2321	1505	1761	1629.53	2192.57		1911.05	2.78117	0.428166
CAGL0C01859g		2438	-227203	ChrC	196167	193730	C	CAGL-IPF1104|CAGL-CDS3254.1|CAG58162.2		CAL0127426							#N/A				1172	1715	948	1163	1113.61	1539.44		1326.53	2.77727	0.467153
CAGL0B02475g	PHO84	1743	-214279	ChrB	236029	237771	W	CAGL-IPF850|CAGL-CDS1617.1|CAG57978.1		CAL0127774	PHO84	YML123C	YML123C	Anc_8.858	YML123C	PHO84	High-affinity inorganic phosphate (Pi) transporter; also low-affinity manganese transporter; regulated by Pho4p and Spt7p; mutation confers resistance to arsenate; exit from the ER during maturation requires Pho86p; cells overexpressing Pho84p accumulate heavy metals but do not develop symptoms of metal toxicity				4380	6738	6015	6251	5532.33	7029.96		6281.15	2.76695	0.345629		0
CAGL0K12584g		3339	984779	ChrK	1244168	1240830	C	CAGL-IPF4629|CAGL-CDS0306.1|CAG61726.1		CAL0134861	MIL1	YFL034W	YFL034W	Anc_8.032	YFL034W		Putative integral membrane protein that interacts with Rpp0p; Rpp0p is a component of the ribosomal stalk				145	298	135	212	148.493	274.126		211.309	2.76517	0.884449
CAGL0J09372g		587	707906	ChrJ	925576	924990	C	CAGL-IPF6953|CAGL-CDS4936.1|CAG61068.1		CAL0129523	HNT1	YDL125C	YDL125C	Anc_7.287	YDL125C	HNT1	Adenosine 5'-monophosphoramidase; interacts physically and genetically with Kin28p, a CDK and TFIIK subunit, and genetically with CAK1; member of the histidine triad (HIT) superfamily of nucleotide-binding proteins and similar to Hint; protein abundance increases in response to DNA replication stress				0	34	4	22	3.222	30.881		17.0515	2.75865	3.26069
CAGL0K01529g		1221	-122204	ChrK	136126	134906	C	CAGL-IPF5091|CAGL-CDS2725.1|CAG61252.1		CAL0133917	SLM3	YDL033C	YDL033C	Anc_3.158	YDL033C	SLM3	tRNA-specific 2-thiouridylase; responsible for 2-thiolation of the wobble base of mitochondrial tRNAs; human ortholog is implicated in myoclonus epilepsy associated with ragged red fibers (MERRF)				138	273	152	247	154.436	282.119		218.277	2.75639	0.869292
CAGL0I07969g		192	-13926	ChrI	778758	778949	W	CAGL-IPF15578|CAR58035.1		CAL0132466	ATP19	YOL077W-A	YOL077W-A	Anc_3.128	YOL077W-A	ATP19	Subunit k of the mitochondrial F1F0 ATP synthase; F1F0 ATP synthase is a large, evolutionarily conserved enzyme complex required for ATP synthesis; associated only with the dimeric form of ATP synthase				643	1040	510	622	605.805	885.181		745.493	2.75494	0.547119
CAGL0J10582g		1410	819073	ChrJ	1035745	1037154	W	CAGL-IPF2842|CAGL-CDS2255.1|CAG61123.1		CAL0133400		YML017W	YML017W	Anc_5.550	YML017W	PSP2	Asn rich cytoplasmic protein that contains RGG motifs; high-copy suppressor of group II intron-splicing defects of a mutation in MRS2 and of a conditional mutation in POL1 (DNA polymerase alpha); possible role in mitochondrial mRNA splicing				47	145	42	83	47.831	122.096		84.9638	2.74971	1.352		0
CAGL0E04510g		2112	186296	ChrE	431224	433335	W	CAGL-IPF2515|CAGL-CDS1087.1|CAG58803.1		CAL0128894	DDL1	YOR022C	YOR022C	Anc_5.604	YOR022C		Putative carboxylic ester hydrolase; similar to bovine phospholipase A1; the authentic, non-tagged protein is detected in highly purified mitochondria in high-throughput studies				303	565	301	384	319.706	508.332		414.019	2.7486	0.669027		0
CAGL0J05742g		762	332572	ChrJ	550329	549568	C	CAGL-IPF7945|CAGL-CDS3977.1|CAG60906.1		CAL0133288	ALF1	YNL148C	YNL148C	Anc_2.120	YNL148C	ALF1	Alpha-tubulin folding protein; similar to mammalian cofactor B; Alf1p-GFP localizes to cytoplasmic microtubules; required for the folding of alpha-tubulin and may play an additional role in microtubule maintenance				146	255	170	295	168.435	301.222		234.829	2.74414	0.838638
CAGL0I00638g		783	-745269	ChrI	47120	47902	W	CAGL-IPF2013|CAGL-CDS3914.1|CAG60218.1		CAL0132260	COQ11	YLR290C	YLR290C	Anc_6.087	YLR290C		Putative protein of unknown function; the authentic, non-tagged protein is detected in highly purified mitochondria in high-throughput studies; YLR290C is not an essential gene				84	259	96	114	96.328	197.247		146.788	2.7426	1.03398
CAGL0F01243g		1632	-99293	ChrF	126136	127767	W	CAGL-IPF3728|CAGL-CDS1812.1|CAG58952.1		CAL0131118	MDM38	YOL027C	YOL027C	Anc_7.116	YOL027C	MDM38	Mitochondrial protein; forms a complex with Mba1p to facilitate recruitment of mRNA-specific translational activators to ribosomes; roles in protein export and K+/H+ exchange; human ortholog Letm1 implicated in Wolf-Hirschhorn syndrome				1829	2527	1482	1800	1738.75	2318.4		2028.58	2.73224	0.415078
CAGL0I04620g		1194	-380176	ChrI	412007	413200	W	CAGL-IPF5901|CAGL-CDS2782.1|CAG60387.1		CAL0130151	CST26	YDR018C	YBR042C	Anc_3.244	YBR042C	CST26	Putative transferase involved in phospholipid biosynthesis; required for incorporation of stearic acid into phosphatidylinositol; affects chromosome stability when overexpressed; CST26 has a paralog, YDR018C, that arose from the whole genome duplication				56	169	48	83	55.664	134.096		94.8802	2.72645	1.26846
CAGL0J05984g		1044	349066	ChrJ	566964	565921	C	CAGL-IPF2279|CAGL-CDS3180.1|CAG60917.1		CAL0133440	AAH1	YNL141W	YNL141W	Anc_2.104	YNL141W	AAH1	Adenine deaminase (adenine aminohydrolase); converts adenine to hypoxanthine; involved in purine salvage; transcriptionally regulated by nutrient levels and growth phase; Aah1p degraded upon entry into quiescence via SCF and the proteasome				80	200	101	165	97.1055	197.608		147.357	2.72373	1.02501
CAGL0L10043g		1362	92133	ChrL	1079995	1078634	C	CAGL-IPF9257|CAGL-CDS2368.1|CAG62179.1		CAL0135716	STD1	YOR047C	YOR047C	Anc_5.644	YOR047C	STD1	Protein involved in control of glucose-regulated gene expression; interacts with kinase Snf1p, glucose sensors Snf3p and Rgt2p, TATA-binding Spt15p; regulator of transcription factor Rgt1p; interactions with Pma1p appear to propagate [GAR+]; STD1 has a paralog, MTH1, that arose from the whole genome duplication				457	873	518	562	517.249	766.551		641.9	2.72236	0.567523
CAGL0J01958g		2106	-21928	ChrJ	196501	194396	C	CAGL-IPF6469|CAGL-CDS1094.1|CAG60739.1		CAL0133566	AIM21	YIR003W	YIR003W	Anc_7.156	YIR003W	AIM21	Protein of unknown function; involved in mitochondrial migration along actin filament; may interact with ribosomes; GFP-fusion protein colocalizes with Sac1p to the actin cytoskeleton				1308	1881	1144	1383	1290.49	1751.25		1520.87	2.71087	0.440461
CAGL0E00715g		930	-179979	ChrE	65540	66469	W	CAGL-IPF5567|CAGL-CDS3528.1|CAG58638.1		CAL0128964	RSM24	YDR175C	YDR175C	Anc_8.373	YDR175C	RSM24	Mitochondrial ribosomal protein of the small subunit				147	249	150	271	157.825	284.171		220.998	2.70471	0.848431
CAGL0I07755g	HAL9	3162	-45614	ChrI	748746	745585	C	CAGL-IPF4286|CAGL-CDS0371.1|CAG60523.1|ZCF25		CAL0129458	HAL9		YOL089C	Anc_3.109	YOL089C	HAL9	Putative transcription factor containing a zinc finger; overexpression increases salt tolerance through increased expression of the ENA1 (Na+/Li+ extrusion pump) gene while gene disruption decreases both salt tolerance and ENA1 expression; HAL9 has a paralog, TBS1, that arose from the whole genome duplication	dup			1146	1751	936	1061	1093.95	1497.72		1295.83	2.67802	0.453219		0
CAGL0B00550g		957	-405533	ChrB	46124	45168	C	CAGL-IPF3691|CAGL-CDS3428.1|CAG57894.1		CAL0127712	APA1	YDR530C	YCL050C	Anc_1.017	YCL050C	APA1	AP4A phosphorylase; bifunctional diadenosine 5',5'''-P1,P4-tetraphosphate phosphorylase and ADP sulfurylase involved in catabolism of bis(5'-nucleosidyl) tetraphosphates; catalyzes phosphorolysis of dinucleoside oligophosphates, cleaving substrates' alpha/beta-anhydride bond and introducing Pi into the beta-position of the corresponding NDP formed; protein abundance increases under DNA replicatio…				377	665	363	450	391.147	596.975		494.061	2.67349	0.609961
CAGL0F08811g		1842	644143	ChrF	869467	871308	W	CAGL-IPF641|CAGL-CDS1433.1|CAG59276.1		CAL0131178	SNU71	YGR013W	YGR013W	Anc_4.149	YGR013W	SNU71	Component of U1 snRNP required for mRNA splicing via spliceosome; yeast specific, no metazoan counterpart				43	189	68	75	60.274	139.412		99.8432	2.66681	1.20975
CAGL0I04796g		885	-362547	ChrI	430675	429791	C	CAGL-IPF5889|CAGL-CDS3658.1|CAG60395.1		CAL0132744	SCO2	YBR037C	YBR037C	Anc_3.225	YBR037C	SCO1	Copper-binding protein of mitochondrial inner membrane; required for cytochrome c oxidase activity and respiration; may function to deliver copper to cytochrome c oxidase; similar to thioredoxins; SCO1 has a paralog, SCO2, that arose from the whole genome duplication	dup			34	119	33	68	36.3315	100.314		68.3227	2.6657	1.46523
CAGL0D04158g		819	-143870	ChrD	411127	410309	C	CAGL-IPF4692|CAGL-CDS3816.1|CAG58508.1		CAL0128099	RSM25	YIL093C	YIL093C	Anc_2.290	YIL093C	RSM25	Mitochondrial ribosomal protein of the small subunit				193	327	152	258	181.936	315.559		248.747	2.66398	0.794479
CAGL0M02299g		2682	-774543	ChrM	273725	276406	W	CAGL-IPF6622|CAGL-CDS0612.1|CAG62422.1		CAL0137187	YPL150W	YPL150W	YPL150W	Anc_8.668	YPL150W		Protein kinase of unknown cellular role; binds phosphatidylinositols and cardiolipin in a large-scale study				704	1098	627	763	701.298	996.736		849.017	2.65901	0.507184
CAGL0L06732g		867	-226884	ChrL	760731	759865	C	CAGL-IPF7651|CAGL-CDS3703.1|CAG62039.1		CAL0136082	MRPS9	YBR146W	YBR146W	Anc_3.117	YBR146W	MRPS9	Mitochondrial ribosomal protein of the small subunit				20	75	40	96	33.22	94.708		63.964	2.65713	1.51143
CAGL0F03905g		2127	152780	ChrF	380088	377962	C	CAGL-IPF1726|CAGL-CDS1063.1|CAG59064.1		CAL0129366	SKY1	YMR216C	YMR216C	Anc_8.732	YMR216C	SKY1	SR protein kinase (SRPK); involved in regulating proteins involved in mRNA metabolism and cation homeostasis; similar to human SRPK1				264	455	306	427	302.983	478.509		390.746	2.65014	0.659308
CAGL0H00737g		3129	-882873	ChrH	73754	70626	C	CAGL-IPF9216|CAGL-CDS0385.1|CAG59762.1		CAL0131856	GYP5		YPL249C	Anc_6.281	YPL249C	GYP5	GTPase-activating protein (GAP) for yeast Rab family members; involved in ER to Golgi trafficking; exhibits GAP activity toward Ypt1p that is stimulated by Gyl1p, also acts on Sec4p; interacts with Gyl1p, Rvs161p and Rvs167p; involved in recruiting Rvs167p to the bud tip during polarized growth; relocalizes from bud neck to cytoplasm upon DNA replication stress; GYP5 has a paralog, GYL1, that aro…	dup			3598	4679	3140	3734	3544.27	4526.76		4035.51	2.64869	0.352989
CAGL0B03773g		1818	-76314	ChrB	373956	375773	W	CAGL-IPF739|CAGL-CDS1478.1|CAG58034.1		CAL0127162		YGR191W	YGR191W	Anc_5.158	YGR191W	HIP1	High-affinity histidine permease; also involved in the transport of manganese ions				630	1026	630	745	665.965	950.197		808.081	2.64797	0.512781
CAGL0G10153g		387	912806	ChrG	973396	973782	W	CAGL-IPF1508|CAGL-CDS5066.1|CAG59729.1		CAL0129153		YDR529C	YDR529C	Anc_1.016	YDR529C	QCR7	Subunit 7 of ubiquinol cytochrome-c reductase (Complex III); Complex III is a component of the mitochondrial inner membrane electron transport chain; oriented facing the mitochondrial matrix; N-terminus appears to play a role in complex assembly				162	323	152	223	166.436	293.067		229.751	2.64605	0.816261
CAGL0M02651g		1389	-744332	ChrM	305971	304583	C	CAGL-IPF6597|CAGL-CDS2307.1|CAG62438.1|ZCF39		CAL0137313	RDS2	YPL133C	YPL133C	Anc_8.642	YPL133C	RDS2	Transcription factor involved in regulating gluconeogenesis; also involved in the regulation of glyoxylate cycle genes; member of the zinc cluster family of proteins; confers resistance to ketoconazole				2332	2966	1916	2429	2231.34	2906.18		2568.76	2.63659	0.381215		0
CAGL0E02013g		1310	-45835	ChrE	200803	199494	C	CAGL-IPF14078|CAG58696.1		CAL0128568	RPL18A	YOL120C	YOL120C	Anc_3.052	YOL120C	RPL18A	Ribosomal 60S subunit protein L18A; intron of RPL18A pre-mRNA forms stem-loop structures that are a target for Rnt1p cleavage leading to degradation; homologous to mammalian ribosomal protein L18, no bacterial homolog; RPL18A has a paralog, RPL18B, that arose from the whole genome duplication				949	1469	857	982	951.563	1310.46		1131.01	2.63019	0.461703
CAGL0C04873g		882	31586	ChrC	453297	454178	W	CAGL-IPF4124|CAGL-CDS3677.1|CAG58291.1		CAL0127258	PXP2	YJR111C	YJR111C	Anc_7.490	YJR111C		Putative protein of unknown function; green fluorescent protein (GFP)-fusion protein localizes to the mitochondria				7562	9725	7378	8438	7880.48	9803.95		8842.21	2.62834	0.31508
CAGL0F07711g		1107	526102	ChrF	752900	751794	C	CAGL-IPF553|CAGL-CDS3002.1|CAG59227.1		CAL0130996	MME1	YMR166C	YMR166C	Anc_2.344	YMR166C		Predicted transporter of the mitochondrial inner membrane; has similarity to human mitochondrial ATP-Mg/Pi carriers; YMR166C is not an essential gene				90	185	82	157	91.551	185.423		138.487	2.62811	1.01818
CAGL0L04796g		1026	-435731	ChrL	550938	551963	W	CAGL-IPF4597|CAGL-CDS3228.1|CAG61954.1		CAL0136064		YPR129W	YPR129W	Anc_3.464	YPR129W	SCD6	Repressor of translation initiation; binds eIF4G through its RGG domain and inhibits recruitment of the preinitiation complex; also contains an Lsm domain; may have a role in RNA processing; overproduction suppresses null mutation in clathrin heavy chain gene CHC1; forms cytoplasmic foci upon DNA replication stress				508	926	540	583	554.97	805.346		680.158	2.62643	0.5372
CAGL0B04983g		471	33222	ChrB	484166	484636	W	CAGL-IPF650|CAGL-CDS4769.1|CAG58087.1		CAL0127822	APS1	YLR170C	YLR170C	Anc_1.388	YLR170C	APS1	Small subunit of the clathrin-associated adaptor complex AP-1; AP-1 is involved in protein sorting at the trans-Golgi network; homolog of the sigma subunit of the mammalian clathrin AP-1 complex				789	988	681	1005	773.795	1083.43		928.611	2.61496	0.485578
CAGL0I08085g		462	-2463	ChrI	790086	790547	W	CAGL-IPF4325|CAGL-CDS4799.1|CAG60538.1		CAL0130464	SDH5	YOL071W	YOL071W	Anc_3.144	YOL071W	EMI5	Subunit of succinate dehydrogenase; complex couples succinate oxidation to ubiquinone reduction; required for FAD cofactor attachment to Sdh1p; mutations in human ortholog PGL2 are associated with neuroendocrine tumors (paraganglioma)				2479	3179	2245	2765	2487.6	3209.41		2848.5	2.5938	0.367554		0
CAGL0G07667g		777	667956	ChrG	728351	729127	W	CAGL-IPF8259|CAGL-CDS3944.1|CAG59622.1		CAL0129375	PRY1		YKR013W	Anc_1.291	YKR013W	PRY2	Sterol binding protein involved in the export of acetylated sterols; secreted glycoprotein and member of the CAP protein superfamily (cysteine-rich secretory proteins (CRISP), antigen 5, and pathogenesis related 1 proteins); sterol export function is redundant with that of PRY1; may be involved in detoxification of hydrophobic compounds; PRY2 has a paralog, PRY1, that arose from the whole genome …	dup			333	573	295	383	331.373	511.746		421.559	2.59328	0.626975		0
CAGL0G07315g		477	633177	ChrG	694198	693722	C	CAGL-IPF7077|CAGL-CDS4752.1|CAG59606.1		CAL0130711	RCF1	YML030W	YML030W	Anc_5.571	YML030W	RCF1	Cytochrome c oxidase subunit; required for assembly of the Complex III-Complex IV supercomplex, and for assembly of Cox13p and Rcf2p into cytochrome c oxidase; similar to Rcf2p, and either Rcf1p or Rcf2p is required for late-stage assembly of the Cox12p and Cox13p subunits and for cytochrome c oxidase activity; required for growth under hypoxic conditions; member of the hypoxia induced gene famil…				275	462	245	349	274.597	436.34		355.469	2.58959	0.668133
CAGL0M09383g		2946	-115757	ChrM	935324	932379	C	CAGL-IPF9390|CAGL-CDS0470.1|CAG62730.1		CAL0136459	SEA4	YBL104C	YBL104C	Anc_7.440	YBL104C	SEA4	Subunit of the SEA (Seh1-associated) complex; SEA is a coatomer-related complex that associates dynamically with the vacuole; has an N-terminal beta-propeller fold and a C-terminal RING motif; promoter contains multiple GCN4 binding sites				197	391	187	246	203.379	340.533		271.956	2.5882	0.743627
CAGL0J09636g		1593	729855	ChrJ	946436	948028	W	CAGL-IPF6935|CAGL-CDS1906.1|CAG61079.1		CAL0132914	GLE1	YDL207W	YDL207W	Anc_8.460	YDL207W	GLE1	Cytoplasmic nucleoporin required for polyadenylated mRNA export; contains a nuclear export signal; when bound to inositol hexakisphosphate (IP6), functions as an activator for the Dbp5p ATPase activity at the nuclear pore complex during mRNA export; mediates translation initiation; required for efficient translation termination				26	130	76	110	56.218	130.405		93.3115	2.58762	1.2139
CAGL0F08283g	GCN5	1641	600435	ChrF	825860	827500	W	CAGL-IPF605|CAGL-CDS1793.1|CAG59253.1		CAL0131206	GCN5	YGR252W	YGR252W	Anc_5.065	YGR252W	GCN5	Catalytic subunit of ADA and SAGA histone acetyltransferase complexes; acetyltransferase, modifies N-terminal lysines on histones H2B and H3; acetylates Rsc4p, a subunit of the RSC chromatin-remodeling complex, altering replication stress tolerance; relocalizes to the cytosol in response to hypoxia; mutant displays reduced transcription elongation in the G-less-based run-on (GLRO) assay; greater …				6	54	1	9	4.5555	33.2695		18.9125	2.57637	2.86852		0
CAGL0J03872g		1986	152088	ChrJ	368472	370457	W	CAGL-IPF6871|CAGL-CDS1224.1|CAG60822.1		CAL0133368	KIN4		YOR233W	Anc_8.654	YOR233W	KIN4	Serine/threonine protein kinase; inhibits the mitotic exit network (MEN) when the spindle position checkpoint is activated; localized asymmetrically to mother cell cortex, spindle pole body and bud neck; KIN4 has a paralog, FRK1, that arose from the whole genome duplication	dup			515	676	399	623	480.144	703.766		591.956	2.57512	0.551628
CAGL0C01683g		3348	-241783	ChrC	178695	182042	W	CAGL-IPF7266|CAGL-CDS0301.1|CAG58154.1		CAL0127538	ISW1	YBR245C	YBR245C	Anc_6.161	YBR245C	ISW1	ATPase subunit of imitation-switch (ISWI) class chromatin remodelers; ATPase; forms a complex with Ioc3p (Isw1a), and a complex with Ioc2p and Ioc4p (Isw1b); Isw1a and Isw1b have partially overlapping and distinct roles, Isw1a involved in repression of transcription initiation and Isw1b involved in regulation of transcription elongation; Isw1b recruited to open reading frames by H3K36 methylation…				160	344	158	204	168.769	292.442		230.606	2.57506	0.793101
CAGL0L02233g		732	-725825	ChrL	260991	261722	W	CAGL-IPF8440|CAGL-CDS4062.1|CAG61837.1		CAL0135316	MRPL13	YKR006C	YKR006C	Anc_2.516	YKR006C	MRPL13	Mitochondrial ribosomal protein of the large subunit; not essential for mitochondrial translation				12	51	15	56	15.3325	59.288		37.3103	2.56929	1.95115
CAGL0C01375g		2052	-274655	ChrC	146471	148522	W	CAGL-IPF7238|CAGL-CDS1142.1|CAG58140.1		CAL0127424	YIL108W	YIL108W	YIL108W	Anc_2.263	YIL108W		Putative metalloendopeptidase; forms cytoplasmic foci upon DNA replication stress				239	418	244	340	256.042	409.07		332.556	2.55234	0.675967
CAGL0K01375g	MRP10	288	-134585	ChrK	122991	123278	W	CAGL-IPF5100|CAGL-CDS5616.1|CAG61245.1		CAL0134147	MRP10	YDL045W-A	YDL045W-A	Anc_3.145	YDL045W-A	MRP10	Mitochondrial ribosomal protein of the small subunit; contains twin cysteine-x9-cysteine motifs				209	399	226	299	231.043	375.565		303.304	2.55082	0.700899
CAGL0J09790g		903	742957	ChrJ	960785	959883	C	CAGL-IPF9278|CAGL-CDS3602.1|CAG61086.1		CAL0133086	GGC1	YDL198C	YDL198C	Anc_8.445	YDL198C	GGC1	Mitochondrial GTP/GDP transporter; essential for mitochondrial genome maintenance; has a role in mitochondrial iron transport; member of the mitochondrial carrier family				585	891	577	727	614.024	872.159		743.091	2.54678	0.506296
CAGL0K03025g		504	25608	ChrK	283579	283076	C	CAGL-IPF2216|CAGL-CDS4680.1|CAG61317.1		CAL0134597	TVP18	YMR071C	YMR071C	Anc_2.534	YMR071C	TVP18	Integral membrane protein; localized to late Golgi vesicles along with the v-SNARE Tlg2p; may interact with ribosomes, based on co-purification experiments				302	564	328	390	334.204	511.345		422.774	2.54055	0.613568
CAGL0L01551g		933	-814058	ChrL	173590	172658	C	CAGL-IPF7418|CAGL-CDS3518.1|CAG61810.1		CAL0135756	SUR7	YML052W	YML052W	Anc_1.501	YML052W	SUR7	Plasma membrane protein of unknown function involved with endocytosis; associated with endocytosis along with Pil1p and Lsp1p; component of eisosomes; sporulation and plasma membrane sphingolipid content are altered in mutants; localizes to furrow-like invaginations (MCC patches)				234	426	222	298	241.321	388.479		314.9	2.53783	0.686883		0
CAGL0C05049g		3546	55531	ChrC	475910	479455	W	CAGL-IPF4108|CAGL-CDS0254.1|CAG58299.1		CAL0127572	SWH1		YAR042W	Anc_3.175	YAR042W	SWH1	Protein similar to mammalian oxysterol-binding protein; contains ankyrin repeats; localizes to the Golgi and the nucleus-vacuole junction; SWH1 has a paralog, OSH2, that arose from the whole genome duplication	dup			809	1132	843	1079	873.786	1198.75		1036.27	2.53592	0.456184
CAGL0M12276g		1950	176501	ChrM	1225135	1227084	W	CAGL-IPF6319|CAGL-CDS1272.1|CAG62856.1		CAL0136929	GEM1	YAL048C	YAL048C	Anc_7.019	YAL048C	GEM1	Outer mitochondrial membrane GTPase, subunit of the ERMES complex; potential regulatory subunit of the ERMES complex that links the ER to mitochondria and may promote inter-organellar calcium and phospholipid exchange as well as coordinating mitochondrial DNA replication and growth; cells lacking Gem1p contain collapsed, globular, or grape-like mitochondria; ortholog of metazoan Miro GTPases				294	494	244	334	283.542	443.557		363.55	2.52402	0.645557
CAGL0K00539g		1371	-193007	ChrK	65398	64028	C	CAGL-IPF5167|CAGL-CDS2345.1|CAG61209.1		CAL0134771		YPL259C	YPL259C	Anc_7.127	YPL259C	APM1	Mu1-like medium subunit of the AP-1 complex; binds clathrin; involved in clathrin-dependent Golgi protein sorting; the AP-1 complex is the clathrin-associated protein complex				148	231	122	234	142.771	253.507		198.139	2.51757	0.828323
CAGL0K02343g		3489	-46502	ChrK	209474	212962	W	CAGL-IPF2267|CAGL-CDS0270.1|CAG61288.1		CAL0133951	SDD4	YPR022C	YPR022C	Anc_8.130	YPR022C		Putative transcription factor, as suggested by computational analysis; green fluorescent protein (GFP)-fusion protein localizes to both the cytoplasm and the nucleus and is induced in response to the DNA-damaging agent MMS				2314	3110	1934	2250	2232.34	2873.38		2552.86	2.51573	0.364191		0
CAGL0K00825g		888	-169945	ChrK	88218	87331	C	CAGL-IPF5146|CAGL-CDS3642.1|CAG61221.1		CAL0133779		YGR208W	YGR208W	Anc_5.125	YGR208W	SER2	Phosphoserine phosphatase of the phosphoglycerate pathway; involved in serine and glycine biosynthesis, expression is regulated by the available nitrogen source				5	54	6	18	6.833	38.539		22.686	2.48759	2.49573
CAGL0M10549g		678	11372	ChrM	1060642	1061319	W	CAGL-IPF8959|CAGL-CDS4211.1|CAG62783.1		CAL0137445	RCF2	YNR018W	YNR018W	Anc_6.314	YNR018W	RCF2	Cytochrome c oxidase subunit; has a role in assembly of respiratory supercomplexes; similar to Rcf1p, and either Rcf1p or Rcf2p is required for late-stage assembly of the Cox12p and Cox13p subunits and for cytochrome c oxidase activity; associates with the cytochrome c oxidase - cytochrome bc1 supercomplex; null mutant accumulates reactive oxygen species; member of the conserved hypoxia induced g…				302	581	377	426	361.423	540.923		451.173	2.46731	0.581733
CAGL0F07249g		1611	480136	ChrF	705576	707186	W	CAGL-IPF518|CAGL-CDS1861.1|CAG59206.1		CAL0130920	TAF6	YGL112C	YGL112C	Anc_6.141	YGL112C	TAF6	Subunit (60 kDa) of TFIID and SAGA complexes; involved in transcription initiation of RNA polymerase II and in chromatin modification, similar to histone H4; relocalizes to the cytosol in response to hypoxia				485	711	466	623	502.363	721.266		611.815	2.46322	0.521802
CAGL0I05456g		1365	-274829	ChrI	517269	518633	W	CAGL-IPF1347|CAGL-CDS2352.1|CAG60423.1		CAL0132460		YKL059C	YKL059C	Anc_2.579	YKL059C	MPE1	Essential conserved subunit of CPF cleavage and polyadenylation factor; plays a role in 3' end formation of mRNA via the specific cleavage and polyadenylation of pre-mRNA, contains a putative RNA-binding zinc knuckle motif; relocalizes to the cytosol in response to hypoxia				12	67	3	14	8.6665	42.697		25.6818	2.46021	2.30061
CAGL0C01353g		2694	-278230	ChrC	145268	142575	C	CAGL-IPF7237|CAGL-CDS0603.1|CAG58139.1	n	CAL0127234	SEC24		YIL109C	Anc_2.262	YIL109C	SEC24	Component of the Sec23p-Sec24p heterodimer of the COPII vesicle coat; required for cargo selection during vesicle formation in ER to Golgi transport; homologous to Sfb3p; SEC24 has a paralog, SFB2, that arose from the whole genome duplication	dup			572	833	448	591	535.864	763.531		649.697	2.46017	0.510819
CAGL0A03542g	COX12	252	283599	ChrA	361030	360779	C	CAGL-IPF14989|CAG57814.1		CAL0126937	COX12	YLR038C	YLR038C	Anc_2.403	YLR038C	COX12	Subunit VIb of cytochrome c oxidase; cytochrome c oxidase is also known as respiratory Complex IV and is the terminal member of the mitochondrial inner membrane electron transport chain; required for assembly of cytochrome c oxidase but not required for activity after assembly; phosphorylated; easily released from the intermembrane space, suggesting a loose association with Complex IV				1040	1554	981	1108	1065.95	1426.73		1246.34	2.45975	0.420583
CAGL0E05104g		777	253137	ChrE	498733	499509	W	CAGL-IPF5011|CAGL-CDS3940.1|CAG58829.1		CAL0128802	LYS5	YGL154C	YGL154C	Anc_2.314	YGL154C	LYS5	Phosphopantetheinyl transferase involved in lysine biosynthesis; converts inactive apo-form of Lys2p (alpha-aminoadipate reductase) into catalytically active holo-form by posttranslational addition of phosphopantetheine				561	947	530	580	575.915	814.09		695.003	2.45847	0.499332
CAGL0D05918g	ATF2	1695	9647	ChrD	563388	565082	W	CAGL-IPF4884|CAGL-CDS1700.1|CAG58577.1		CAL0128465	ATF2	YGR177C	YGR177C	Anc_5.184	YGR177C	ATF2	Alcohol acetyltransferase; may play a role in steroid detoxification; forms volatile esters during fermentation, which is important for brewing and winemaking				7766	9508	7529	8771	8066.36	9890.42		8978.39	2.45756	0.294114
CAGL0B01287g	BUD5	3744	-334475	ChrB	114832	118575	W	CAGL-IPF5280|CAGL-CDS0213.1|CAG57926.1		CAL0127926		YCR038C	YCR038C	Anc_1.134	YCR038C	BUD5	GTP/GDP exchange factor for Rsr1p (Bud1p); required for both axial and bipolar budding patterns; mutants exhibit random budding in all cell types				1347	1858	1200	1427	1341.1	1765.51		1553.3	2.45403	0.396667
CAGL0M00286g	HIR3	4848	-1013636	ChrM	33549	38396	W	CAGL-IPF5406|CAGL-CDS0081.1|CAG62333.1		CAL0136481	HIR3	YJR140C	YJR140C	Anc_4.375	YJR140C	HIR3	Subunit of the HIR complex; a nucleosome assembly complex involved in regulation of histone gene transcription; involved in position-dependent gene silencing and nucleosome reassembly; ortholog of human CABIN1 protein				114	196	105	195	116.328	213.173		164.75	2.44459	0.873829		0
CAGL0I02904g		1293	-537713	ChrI	255713	254421	C	CAGL-IPF7324|CAGL-CDS2563.1|CAG60314.1	n	CAL0132256	YNL108C		YOR110W	Anc_2.169	YOR110W	TFC7	RNA pol III transcription initiation factor complex (TFIIIC) subunit; part of the TauA globular domain of TFIIIC that binds DNA at the BoxA promoter sites of tRNA and similar genes; TFC7 has a paralog, YNL108C, that arose from the whole genome duplication	dup			27	107	32	56	32.276	87.288		59.782	2.43554	1.43532
CAGL0J10428g		3207	801051	ChrJ	1020031	1016825	C	CAGL-IPF2830|CAGL-CDS0357.1|CAG61116.1		CAL0133290		YKL092C	YKL092C	Anc_2.490	YKL092C	BUD2	GTPase activating factor for Rsr1p/Bud1p; plays a role in spindle position checkpoint distinct from its role in bud site selection; required for both axial and bipolar budding patterns; mutants exhibit random budding in all cell types				338	576	309	382	341.649	512.661		427.155	2.4336	0.585488
CAGL0M07744g		705	-269976	ChrM	779985	779281	C	CAGL-IPF9231|CAGL-CDS4130.1|CAG62661.1		CAL0136211							#N/A				31	85	52	111	45.386	108.49		76.9382	2.4314	1.25725
CAGL0M10659g		1722	18196	ChrM	1066944	1068665	W	CAGL-IPF9485|CAGL-CDS1651.1|CAG62788.1		CAL0137159	SNF12	YNR023W	YNR023W	Anc_6.322	YNR023W	SNF12	73 kDa subunit of the SWI/SNF chromatin remodeling complex; involved in transcriptional regulation; relocates to the cytosol under hypoxic conditions; deletion mutants are temperature-sensitive; SNF12 has a paralog, RSC6, that arose from the whole genome duplication	dup			133	177	128	263	138.604	243.487		191.045	2.43102	0.812873
CAGL0E01925g		1302	-53499	ChrE	193135	191834	C	CAGL-IPF8407|CAGL-CDS2533.1|CAG58692.1		CAL0128920	TRM11	YOL124C	YOL124C	Anc_3.048	YOL124C	TRM11	Catalytic subunit of adoMet-dependent tRNA methyltransferase complex; required for the methylation of the guanosine nucleotide at position 10 (m2G10) in tRNAs; contains a THUMP domain and a methyltransferase domain; another complex member is Trm112p				789	1004	654	915	758.797	1038.73		898.765	2.4162	0.453038
CAGL0F07029g	MET13	1803	463987	ChrF	689331	691133	W	CAGL-IPF505|CAGL-CDS1504.1|CAG59198.1		CAL0131340	MET13	YGL125W	YGL125W	Anc_6.122	YGL125W	MET13	Major isozyme of methylenetetrahydrofolate reductase; catalyzes the reduction of 5,10-methylenetetrahydrofolate to 5-methyltetrahydrofolate in the methionine biosynthesis pathway				290	502	343	431	336.536	504.351		420.443	2.41174	0.583664
CAGL0K03047g		606	26667	ChrK	284084	284689	W	CAGL-IPF2215|CAGL-CDS4439.1|CAG61318.1		CAL0134509	ABF2	YMR072W	YMR072W	Anc_2.535	YMR072W	ABF2	Mitochondrial DNA-binding protein; involved in mitochondrial DNA replication and recombination, member of HMG1 DNA-binding protein family; activity may be regulated by protein kinase A phosphorylation; ABF2 has a paralog, IXR1, that arose from the whole genome duplication	dup			475	662	392	555	456.256	656.952		556.604	2.40395	0.525946
CAGL0L10120g		3057	103629	ChrL	1092339	1089283	C	CAGL-IPF4135|CAGL-CDS0422.1|CAG62182.1		CAL0135840	RAT1	YOR048C	YOR048C	Anc_5.645	YOR048C	RAT1	Nuclear 5' to 3' single-stranded RNA exonuclease; involved in RNA metabolism, including rRNA and snRNA processing as well as poly (A+) dependent and independent mRNA transcription termination				269	513	347	401	328.259	492.286		410.272	2.39382	0.584663
CAGL0H01309g		1698	-826266	ChrH	129645	127948	C	CAGL-IPF5802|CAGL-CDS1691.1|CAG59788.1		CAL0130301	DPL1	YDR294C	YDR294C	Anc_5.310	YDR294C	DPL1	Dihydrosphingosine phosphate lyase; regulates intracellular levels of sphingolipid long-chain base phosphates (LCBPs), degrades phosphorylated long chain bases, prefers C16 dihydrosphingosine-l-phosphate as a substrate				1000	1269	922	1222	1013.17	1350.98		1182.08	2.39359	0.41513
CAGL0L04928g		3141	-424766	ChrL	563986	560846	C	CAGL-IPF4585|CAGL-CDS0412.1|CAG61959.1		CAL0135462	NUP100	YMR047C	YKL068W	Anc_2.610	YKL068W	NUP100	FG-nucleoporin component of central core of the nuclear pore complex; contributes directly to nucleocytoplasmic transport and maintenance of the nuclear pore complex (NPC) permeability barrier and is involved in gene tethering at the nuclear periphery; NUP100 has a paralog, NUP116, that arose from the whole genome duplication	dup			329	463	226	361	291.043	443.865		367.454	2.39051	0.60889
CAGL0D01628g		1083	-383501	ChrD	171628	170546	C	CAGL-IPF4793|CAGL-CDS3078.1|CAG58397.1		CAL0128541	BRR1	YPR057W	YPR057W	Anc_3.347	YPR057W	BRR1	snRNP protein component of spliceosomal snRNPs; required for pre-mRNA splicing and snRNP biogenesis; in null mutant newly-synthesized snRNAs are destabilized and 3'-end processing is slowed				46	126	44	82	48.442	112.011		80.2265	2.38908	1.20931
CAGL0G06336g		4257	549162	ChrG	607817	612073	W	CAGL-IPF3436|CAGL-CDS0137.1|CAG59564.1		CAL0129957	MYO4	YOR326W	YAL029C	Anc_7.068	YAL029C	MYO4	Type V myosin motor involved in actin-based transport of cargos; required for mRNA transport, including ASH1 mRNA, and facilitating the growth and movement of ER tubules into the growing bud along with She3p; MYO4 has a paralog, MYO2, that arose from the whole genome duplication	dup			502	790	452	544	503.086	714.512		608.799	2.38538	0.506153
CAGL0H05929g		2868	-371497	ChrH	582132	584999	W	CAGL-IPF4397|CAGL-CDS0504.1|CAG59987.1		CAL0130506	SYH1		YPL105C	Anc_8.587	YPL105C	SYH1	Protein of unknown function that influences nuclear pore distribution; co-purifies with ribosomes; contains a GYF domain, which bind proline-rich sequences; deletion extends chronological lifespan; SYH1 has a paralog, SMY2, that arose from the whole genome duplication	dup			819	1025	613	872	751.022	1024.06		887.539	2.37702	0.447368
CAGL0M05577g		1512	-452657	ChrM	597707	596196	C	CAGL-IPF7168|CAGL-CDS2062.1|CAG62564.1		CAL0137347		YBR163W	YBR163W	Anc_8.518	YBR163W	EXO5	Mitochondrial 5'-3' exonuclease and sliding exonuclease; required for mitochondrial genome maintenance; distantly related to the RecB nuclease domain of bacterial RecBCD recombinases; may be regulated by the transcription factor Ace2				13	50	28	75	23.054	69.9125		46.4832	2.37542	1.60053
CAGL0M04015g		831	-602135	ChrM	447889	447059	C	CAGL-IPF6767|CAGL-CDS3787.1|CAG62497.1		CAL0136587	DAL82	YNL314W	YNL314W	Anc_3.031	YNL314W	DAL82	Positive regulator of allophanate inducible genes; binds a dodecanucleotide sequence upstream of all genes that are induced by allophanate; contains an UISALL DNA-binding, a transcriptional activation, and a coiled-coil domain				2	36	2	12	3.111	26.026		14.5685	2.36608	3.0645		0
CAGL0H05885g		1341	-376519	ChrH	577874	579214	W	CAGL-IPF4400|CAGL-CDS2796.1|CAG59985.1		CAL0131822	FMP30	YPL103C	YPL103C	Anc_8.582	YPL103C	FMP30	Protein with a role in maintaining mitochondrial morphology; also involved in maintaining normal cardiolipin levels; mitochondrial inner membrane protein; proposed to be involved in N-acylethanolamine metabolism; related to mammalian N-acylPE-specific phospholipase D				34	66	19	77	28.5545	79.0835		53.819	2.3591	1.46966
CAGL0M04125g		873	-594684	ChrM	455361	454489	C	CAGL-IPF8279|CAGL-CDS3689.1|CAG62502.1		CAL0137287	YNL320W	YNL320W	YNL320W	Anc_3.021	YNL320W		Putative protein of unknown function; the authentic, non-tagged protein is detected in highly purified mitochondria in high-throughput studies				656	897	606	794	665.633	914.387		790.01	2.34897	0.458078
CAGL0L03091g		2349	-629770	ChrL	358586	356238	C	CAGL-IPF2743|CAGL-CDS0854.1|CAG61876.1		CAL0135528	SET3		YKR029C	Anc_1.256	YKR029C	SET3	Defining member of the SET3 histone deacetylase complex; which is a meiosis-specific repressor of sporulation genes; necessary for efficient transcription by RNAPII; one of two yeast proteins that contains both SET and PHD domains; SET3 has a paralog, SET4, that arose from the whole genome duplication	dup			230	454	212	235	233.766	365.592		299.679	2.33661	0.645171		0
CAGL0F07381g		1605	493887	ChrF	720934	719330	C	CAGL-IPF530|CAGL-CDS1871.1|CAG59212.1		CAL0131308							#N/A				356	471	341	517	368.425	539.204		453.815	2.3354	0.549457
CAGL0C05137g	GPD2	1269	66324	ChrC	489110	487842	C	CAGL-IPF4102|CAGL-CDS2622.1|CAG58303.1		CAL0127442	GPD2		YOL059W	Anc_3.169	YOL059W	GPD2	NAD-dependent glycerol 3-phosphate dehydrogenase; expression is controlled by an oxygen-independent signaling pathway required to regulate metabolism under anoxic conditions; located in cytosol and mitochondria; constitutively active but is inactivated via phosphorylation by energy-stress responsive kinase SNF1; GPD2 has a paralog, GPD1, that arose from the whole genome duplication	dup			805	1052	696	922	790.128	1066.83		928.48	2.33265	0.433173
CAGL0L06402g	YCF1	4608	-264155	ChrL	720723	725330	W	CAGL-IPF7620|CAGL-CDS0096.1|CAG62023.1		CAL0136190	YCF1	YDR135C	YDR135C	Anc_8.303	YDR135C	YCF1	Vacuolar glutathione S-conjugate transporter; member of ATP-binding cassette family; ATPase activity required to support vacuole fusion; forms stable complexes with vacuole fusion machinery; regulates Vam7p recruitment to vacuoles; has role in detoxifying metals such as cadmium, mercury, and arsenite; also transports unconjugated bilirubin, selenodigluthatione, and oxidized glutathione; similar t…				1037	1334	838	1088	985.009	1305.02		1145.02	2.31995	0.405868
CAGL0M08338g		417	-216957	ChrM	832444	832860	W	CAGL-IPF8015|CAGL-CDS4953.1|CAG62684.1		CAL0136611	MRPL38	YKL170W	YKL170W	Anc_1.179	YKL170W	MRPL38	Mitochondrial ribosomal protein of the large subunit; appears as two protein spots (YmL34 and YmL38) on two-dimensional SDS gels; protein abundance increases in response to DNA replication stress				2	37	21	54	13.6655	51.117		32.3912	2.31794	1.90326
CAGL0M05621g		1326	-447005	ChrM	603266	601941	C	CAGL-IPF7163|CAGL-CDS2468.1|CAG62566.1		CAL0137251	CSH1		YBR161W	Anc_8.514	YBR161W	CSH1	Mannosylinositol phosphorylceramide (MIPC) synthase catalytic subunit; forms a complex with regulatory subunit Csg2p; function in sphingolipid biosynthesis is overlapping with that of Sur1p; CSH1 has a paralog, SUR1, that arose from the whole genome duplication	dup			171	350	211	254	203.71	324.717		264.214	2.31329	0.672663
CAGL0M05885g		1467	-428807	ChrM	621535	620069	C	CAGL-IPF9092|CAGL-CDS2135.1|CAG62578.1		CAL0136653	LAS1	YKR063C	YKR063C	Anc_1.200	YKR063C	LAS1	Protein required for pre-rRNA processing at both ends of ITS2; functions with Grc3p in a conserved mechanism to modulate rRNA processing and ribosome biogenesis; may coordinate the action of the Rat1p-Rai1p exoRNAse; required for the G1/S cell cycle transition; human ortholog is Las1L; mutants require the SSD1-v allele for viability				10	88	18	18	15.999	55.539		35.769	2.31011	1.79552
CAGL0G09515g		1272	847183	ChrG	908601	907330	C	CAGL-IPF1550|CAGL-CDS2615.1|CAG59700.1		CAL0129456	SPR1	YOR190W	YOR190W	Anc_6.099	YOR190W	SPR1	Sporulation-specific exo-1,3-beta-glucanase; contributes to ascospore thermoresistance; SPR1 has a paralog, EXG1, that arose from the whole genome duplication	dup			306	538	332	390	338.426	498.345		418.385	2.30273	0.558304		0
CAGL0D01342g		1647	-404203	ChrD	151208	149562	C	CAGL-IPF2659|CAGL-CDS1778.1|CAG58384.1		CAL0128071	NOT5	YPR072W	YPR072W	Anc_3.370	YPR072W	NOT5	Subunit of CCR4-NOT global transcriptional regulator; involved intranscription initiation and elongation and in mRNA degradation; conserved lysine in human homolog of Not5p and Not3p is mutated in cancers				382	680	413	448	421.422	603.304		512.363	2.29832	0.517621
CAGL0C00715g		573	-347771	ChrC	74667	74095	C	CAGL-IPF6666|CAGL-CDS4525.1|CAG58117.1		CAL0127294	RSA3	YLR221C	YLR221C	Anc_8.436	YLR221C	RSA3	Protein with a likely role in ribosomal maturation; required for accumulation of wild-type levels of large (60S) ribosomal subunits; binds to the helicase Dbp6p in pre-60S ribosomal particles in the nucleolus				7	46	5	22	7.2775	36.881		22.0793	2.29795	2.34136
CAGL0I10725g		1212	266686	ChrI	1060071	1058860	C	CAGL-IPF6416|CAGL-CDS2750.1|CAG60651.1		CAL0130187	YGR122W	YGR122W	YGR122W	Anc_3.476	YGR122W		Protein that may be involved in pH regulation; probable ortholog of A. nidulans PalC, which is involved in pH regulation and binds to the ESCRT-III complex; null mutant does not properly process Rim101p and has decreased resistance to rapamycin; GFP-fusion protein is cytoplasmic; relative distribution to cytoplasm increases upon DNA replication stress				185	319	164	235	184.602	298.092		241.347	2.2887	0.691342
CAGL0G08195g		675	717050	ChrG	778170	777496	C	CAGL-IPF9165|CAG59646.1		CAL0129981	UPS2	YLR168C	YLR168C	Anc_8.388	YLR168C	UPS2	Mitochondrial intermembrane space protein; involved in phospholipid metabolism; has role in regulation of phospholipid metabolism by inhibiting conversion of phosphatidylethanolamine to phosphatidylcholine; null mutant has defects in mitochondrial morphology; similar to Ups1p, Ups3p and to human PRELI; UPS2 has a paralog, UPS3, that arose from the whole genome duplication				252	461	229	269	254.209	389		321.605	2.2868	0.61375
CAGL0M11220g		1971	55686	ChrM	1106280	1104310	C	CAGL-IPF8832|CAGL-CDS1249.1|CAG62808.1		CAL0137365	MRE11	YMR224C	YMR224C	Anc_8.744	YMR224C	MRE11	Nuclease subunit of the MRX complex with Rad50p and Xrs2p; complex functions in repair of DNA double-strand breaks and in telomere stability; Mre11p associates with Ser/Thr-rich ORFs in premeiotic phase; nuclease activity required for MRX function; widely conserved; forms nuclear foci upon DNA replication stress				280	428	274	383	293.207	439.246		366.227	2.28635	0.583111
CAGL0I03520g		321	-493450	ChrI	299490	299170	C	CAGL-IPF7371|CAGL-CDS5431.1|CAG60338.1		CAL0129618	YDL157C	YDL157C	YDL157C	Anc_7.334	YDL157C		Putative protein of unknown function; the authentic, non-tagged protein is detected in highly purified mitochondria in high-throughput studies				87	216	96	122	97.828	180.431		139.13	2.28449	0.883128
CAGL0M01386g		4284	-892415	ChrM	155052	159335	W	CAGL-IPF9116|CAG62381.1		CAL0136905	YSP2		YDR326C	Anc_5.370	YDR326C	YSP2	Protein involved in programmed cell death; mutant shows resistance to cell death induced by amiodarone or intracellular acidification; YSP2 has a paralog, YHR080C, that arose from the whole genome duplication	dup			359	600	365	431	383.257	553.351		468.304	2.27813	0.52988
CAGL0F04521g		861	227268	ChrF	453943	453083	C	CAGL-IPF1674|CAGL-CDS3710.1|CAG59092.1		CAL0129414	ECM13		YBL043W	Anc_7.483	YBL043W	ECM13	Non-essential protein of unknown function; induced by treatment with 8-methoxypsoralen and UVA irradiation; ECM13 has a paralog, YJR115W, that arose from the whole genome duplication	dup			133	254	130	187	139.715	237.488		188.602	2.27588	0.765371		0
CAGL0E05632g		1797	311770	ChrE	558652	556856	C	CAGL-IPF5049|CAGL-CDS1514.1|CAG58852.1		CAL0128630	PUT4	YOR348C	YOR348C	Anc_7.044	YOR348C	PUT4	Proline permease; required for high-affinity transport of proline; also transports the toxic proline analog azetidine-2-carboxylate (AzC); PUT4 transcription is repressed in ammonia-grown cells				2184	3009	2091	2267	2254.55	2832.83		2543.69	2.27379	0.329403
CAGL0C00297g		2151	-391607	ChrC	29470	31620	W	CAGL-IPF6630|CAGL-CDS1040.1|CAG58098.1		CAL0127454	SET2	YJL168C	YJL168C	Anc_1.170	YJL168C	SET2	Histone methyltransferase with a role in transcriptional elongation; methylates H3 lysine 36 (H3K36), which suppresses incorporation of acetylated histones and signals for the deacetylation of these histones within transcribed genes; associates with the C-terminal domain(CTD) of Rpo21p; H3K36me3 (trimethylation) requires Spt6p, proline 38 on H3, CTD of Rpo21p, Ctk1p, and C-terminal SRI domain of …				43	116	41	76	45.2755	103.498		74.3868	2.26729	1.1928		0
CAGL0I01848g		2106	-639729	ChrI	154103	151998	C	CAGL-IPF2098|CAGL-CDS1092.1|CAG60268.1		CAL0132186	SKG6		YHR149C	Anc_5.107	YHR149C	SKG6	Integral membrane protein; localizes primarily to growing sites such as the bud tip or the cell periphery; potential Cdc28p substrate; Skg6p interacts with Zds1p and Zds2p; SKG6 has a paralog, TOS2, that arose from the whole genome duplication	dup			485	771	532	616	539.026	747.168		643.097	2.26112	0.471078
CAGL0I03102g		4365	-524745	ChrI	270217	265853	C	CAGL-IPF7342|CAGL-CDS0122.1|CAG60322.1		CAL0132708	GEA2		YEL022W	Anc_1.455	YEL022W	GEA2	Guanine nucleotide exchange factor for ADP ribosylation factors (ARFs); involved in vesicular transport between the Golgi and ER, Golgi organization, and actin cytoskeleton organization; GEA2 has a paralog, GEA1, that arose from the whole genome duplication	dup			6	62	17	30	13.4435	49.565		31.5042	2.25742	1.88241
CAGL0I05280g		1047	-291509	ChrI	500748	501794	W	CAGL-IPF1340|CAGL-CDS3171.1|CAG60417.1		CAL0132750	YKE4	YIL023C	YIL023C	Anc_7.203	YIL023C	YKE4	Zinc transporter; localizes to the ER; null mutant is sensitive to calcofluor white, leads to zinc accumulation in cytosol; ortholog of the mouse KE4 and member of the ZIP (ZRT, IRT-like Protein) family				694	1001	606	727	684.633	927.159		805.896	2.25726	0.437485
CAGL0C01529g		711	-253995	ChrC	167802	168512	W	CAGL-IPF7253|CAGL-CDS4111.1|CAG58147.1		CAL0127420	CBC2	YPL178W	YPL178W	Anc_6.171	YPL178W	CBC2	Small subunit of the heterodimeric cap binding complex with Sto1p; interacts with Npl3p, possibly to package mRNA for export from the nucleus; may have a role in telomere maintenance; contains an RNA-binding motif				155	287	170	233	172.935	280.922		226.928	2.25695	0.699937
CAGL0B01122g	SAM1	1149	-350133	ChrB	100472	101620	W	CAGL-IPF3659|CAGL-CDS2881.1|CAG57918.1		CAL0127746	SAM1	YLR180W	YLR180W	Anc_1.058	YLR180W	SAM1	S-adenosylmethionine synthetase; catalyzes transfer of the adenosyl group of ATP to the sulfur atom of methionine; SAM1 has a paralog, SAM2, that arose from the whole genome duplication	dup			16	87	47	73	35.1085	87.2415		61.175	2.25541	1.31319
CAGL0D01980g		1686	-348643	ChrD	205102	206787	W	CAGL-IPF4827|CAGL-CDS1717.1|CAG58411.1		CAL0128481	TGL1	YKL140W	YKL140W	Anc_2.424	YKL140W	TGL1	Steryl ester hydrolase; one of three gene products (Yeh1p, Yeh2p, Tgl1p) responsible for steryl ester hydrolase activity and involved in sterol homeostasis; localized to lipid particle membranes				110	184	94	171	108.217	193.12		150.669	2.24339	0.835574
CAGL0F03421g		2454	111139	ChrF	338610	336157	C	CAGL-IPF1764|CAGL-CDS0761.1|CAG59042.1		CAL0129238	ZDS1		YMR273C	Anc_8.831	YMR273C	ZDS1	Protein with a role in regulating Swe1p-dependent polarized growth; involved in maintaining Cdc55p in the cytoplasm where it promotes mitotic entry; involved in mitotic exit through Cdc14p regulation; interacts with silencing proteins at telomeres; has a role in Bcy1p localization; implicated in mRNA nuclear export; ZDS1 has a paralog, ZDS2, that arose from the whole genome duplication	dup			775	980	573	788	706.802	952.374		829.588	2.23966	0.430223
CAGL0M13805g	MP65	1116	309007	ChrM	1359173	1358058	C	CAGL-IPF6053|CAGL-CDS2978.1|CAG62924.1|SCW4		CAL0137403	SCW10	YMR305C	YMR305C	Anc_5.015	YMR305C	SCW10	Cell wall protein with similarity to glucanases; may play a role in conjugation during mating based on mutant phenotype and its regulation by Ste12p; SWC10 has a paralog, SCW4, that arose from the whole genome duplication	dup			528	663	409	604	492.2	686.142		589.171	2.23373	0.479264		0
CAGL0B02321g		1539	-230188	ChrB	220222	221760	W	CAGL-IPF868|CAGL-CDS2002.1|CAG57971.1		CAL0127840	VAN1	YML115C	YML115C	Anc_8.842	YML115C	VAN1	Component of the mannan polymerase I; complex contains Van1p and Mnn9p and is involved in the first steps of mannan synthesis; mutants are vanadate-resistant				171	317	132	175	159.826	261.962		210.894	2.22679	0.712858
CAGL0E02079g		1389	-38103	ChrE	207187	208575	W	CAGL-IPF9186|CAGL-CDS2309.1|CAG58699.1		CAL0129116	MSN1	YOL116W	YOL116W	Anc_3.057	YOL116W	MSN1	Transcriptional activator; involved in regulation of invertase and glucoamylase expression, invasive growth and pseudohyphal differentiation, iron uptake, chromium accumulation, and response to osmotic stress; localizes to the nucleus; relative distribution to the nucleus increases upon DNA replication stress				293	404	258	391	290.819	431.93		361.375	2.22607	0.570678		0
CAGL0I10791g		1008	274640	ChrI	1067923	1066916	C	CAGL-IPF6406|CAGL-CDS3356.1|CAG60654.1		CAL0132650		YJL088W	YJL088W	Anc_1.279	YJL088W	ARG3	Ornithine carbamoyltransferase; also known as carbamoylphosphate:L-ornithine carbamoyltransferase; catalyzes the biosynthesis of the arginine precursor citrulline				622	775	572	798	629.746	855.729		742.737	2.22495	0.442384
CAGL0H03531g	MNP1	531	-627571	ChrH	327227	327757	W	CAGL-IPF1921|CAGL-CDS4623.1|CAG59880.1		CAL0130289	MNP1	YGL068W	YGL068W	Anc_6.213	YGL068W	MNP1	Protein associated with the mitochondrial nucleoid; putative mitochondrial ribosomal protein with similarity to E. coli L7/L12 ribosomal protein; required for normal respiratory growth				119	255	120	153	127.16	218.082		172.621	2.22383	0.778222
CAGL0L07546g		1905	-152409	ChrL	835725	833821	C	CAGL-IPF8859|CAGL-CDS1336.1|CAG62076.1		CAL0135244	BAP3	YDR046C	YBR068C	Anc_3.284	YBR068C	BAP2	High-affinity leucine permease; functions as a branched-chain amino acid permease involved in uptake of leucine, isoleucine and valine; contains 12 predicted transmembrane domains; BAP2 has a paralog, BAP3, that arose from the whole genome duplication	dup			1386	1891	1372	1561	1456.15	1860.47		1658.31	2.22188	0.353509
CAGL0L00803g		2484	-885395	ChrL	100545	103028	W	CAGL-IPF9621|CAGL-CDS0745.1|CAG61779.1		CAL0136078	PIG2	YIL045W	YIL045W	Anc_7.230	YIL045W	PIG2	Putative type-1 protein phosphatase targeting subunit; tethers Glc7p type-1 protein phosphatase to Gsy2p glycogen synthase; PIG2 has a paralog, GIP2, that arose from the whole genome duplication	dup			1698	2238	1584	1826	1729.91	2189.12		1959.52	2.21867	0.339654
CAGL0D05148g		327	-61738	ChrD	493013	492687	C	CAGL-IPF4942|CAGL-CDS5383.1|CAG58544.1		CAL0127961				Anc_7.195			#N/A				159	349	148	153	162.714	265.082		213.898	2.21302	0.704098
CAGL0B04345g		1182	-26177	ChrB	424411	425592	W	CAGL-IPF696|CAGL-CDS2805.1|CAG58059.1		CAL0127040		YBR025C	YBR025C	Anc_3.226	YBR025C	OLA1	P-loop ATPase with similarity to human OLA1 and bacterial YchF; identified as specifically interacting with the proteasome; protein abundance increases in response to hydrogen peroxide and to DNA replication stress				431	626	393	510	434.812	612.605		523.708	2.21299	0.494567
CAGL0E06314g		1896	389854	ChrE	636785	634890	C	CAGL-IPF5996|CAGL-CDS1343.1|CAG58883.1		CAL0128840	RSM22	YKL155C	YKL155C	Anc_5.264	YKL155C	RSM22	Mitochondrial ribosomal protein of the small subunit; also predicted to be an S-adenosylmethionine-dependent methyltransferase				52	68	28	107	42.554	97.6485		70.1013	2.20925	1.1983
CAGL0F07073g		762	468180	ChrF	694044	694805	W	CAGL-IPF507|CAGL-CDS3973.1|CAG59200.1		CAL0130872	RPS2	YGL123W	YGL123W	Anc_6.129	YGL123W	RPS2	Protein component of the small (40S) subunit; essential for control of translational accuracy; phosphorylation by C-terminal domain kinase I (CTDK-I) enhances translational accuracy; methylated on one or more arginine residues by Hmt1p; homologous to mammalian ribosomal protein S2 and bacterial S5				29	88	27	57	30.4985	78.3735		54.436	2.19896	1.36163
CAGL0F05533g		1122	331524	ChrF	558329	557208	C	CAGL-IPF395|CAGL-CDS2952.1|CAG59135.1		CAL0131222	CBS2	YDR197W	YDR197W	Anc_8.405	YDR197W	CBS2	Mitochondrial translational activator of the COB mRNA; interacts with translating ribosomes, acts on the COB mRNA 5'-untranslated leader				52	114	64	118	62.552	127.089		94.8205	2.19756	1.02271
CAGL0F04411g		639	215296	ChrF	441860	441222	C	CAGL-IPF1684|CAGL-CDS4326.1|CAG59087.1		CAL0129316	MRPL16	YBL038W	YBL038W	Anc_3.327	YBL038W	MRPL16	Mitochondrial ribosomal protein of the large subunit; homologous to bacterial L16 ribosomal protein				25	36	24	91	26.832	72.2805		49.5563	2.19605	1.42965
CAGL0K10274g		699	745131	ChrK	1003200	1002502	C	CAGL-IPF3213|CAGL-CDS4148.1|CAG61629.1		CAL0134325	CAT5	YOR125C	YOR125C	Anc_5.445	YOR125C	CAT5	Protein required for ubiquinone (Coenzyme Q) biosynthesis; localizes to the matrix face of the mitochondrial inner membrane in a large complex with ubiquinone biosynthetic enzymes; required for gluconeogenic gene activation				35	77	43	98	42.3865	96.879		69.6328	2.19109	1.19258
CAGL0L02123g	SNF5	3120	-737303	ChrL	251438	248319	C	CAGL-IPF8434|CAGL-CDS0403.1|CAG61832.1		CAL0135800	SNF5	YBR289W	YBR289W	Anc_2.523	YBR289W	SNF5	Subunit of the SWI/SNF chromatin remodeling complex; involved in transcriptional regulation; functions interdependently in transcriptional activation with Snf2p and Snf6p; relocates to the cytosol under hypoxic conditions				60	117	64	124	66.552	132.102		99.327	2.17482	0.989098		0
CAGL0J05412g		1920	301011	ChrJ	519347	517428	C	CAGL-IPF7924|CAGL-CDS1317.1|CAG60891.1		CAL0132980	LSG1	YGL099W	YGL099W	Anc_6.163	YGL099W	LSG1	Putative GTPase involved in 60S ribosomal subunit biogenesis; required for the release of Nmd3p from 60S subunits in the cytoplasm				15	75	11	20	14.6105	50.21		32.4102	2.16971	1.78097
CAGL0F05489g		1464	328389	ChrF	553902	555365	W	CAGL-IPF391|CAGL-CDS2137.1|CAG59133.1		CAL0131228	VPS64		YDR200C	Anc_8.408	YDR200C	VPS64	Protein required for cytoplasm to vacuole targeting of proteins; forms a complex with Far3p and Far7p to Far11p involved in recovery from pheromone-induced cell cycle arrest; mutant has increased aneuploidy tolerance; VPS64 has a paralog, FAR10, that arose from the whole genome duplication	dup			65	133	78	135	76.829	146.543		111.686	2.16957	0.931596
CAGL0I07931g		792	-18856	ChrI	774319	773528	C	CAGL-IPF4313|CAGL-CDS3889.1|CAG60531.1		CAL0132752	REX4	YOL080C	YOL080C	Anc_3.125	YOL080C	REX4	Putative RNA exonuclease; possibly involved in pre-rRNA processing and ribosome assembly				85	177	62	100	77.941	148.05		112.996	2.16792	0.92563
CAGL0I04136g		462	-428186	ChrI	364363	364824	W	CAGL-IPF5938|CAGL-CDS5004.1|CAG60366.1		CAL0132230	MTC3	YGL226W	YGL226W	Anc_3.542	YGL226W	MTC3	Protein of unknown function; green fluorescent protein (GFP)-fusion protein localizes to the mitochondrion; mtc3 is synthetically sick with cdc13-1				21	75	26	54	25.943	70.117		48.03	2.16671	1.43442
CAGL0B01771g		1611	-287311	ChrB	163063	164673	W	CAGL-IPF5242|CAGL-CDS1862.1|CAG57946.1		CAL0127066	FOB1	YDR110W	YDR110W	Anc_8.262	YDR110W	FOB1	Nucleolar protein that binds the rDNA replication fork barrier site; required for replication fork blocking, recombinational hotspot activity, condensin recruitment to replication fork barrier (RFB), and rDNA repeat segregation; related to retroviral integrases				356	528	324	424	358.982	513.252		436.117	2.16032	0.515756
CAGL0K03333g		1809	46904	ChrK	303720	305528	W	CAGL-IPF2199|CAGL-CDS1494.1|CAG61330.1		CAL0134637	MUB1	YMR100W	YMR100W	Anc_2.454	YMR100W	MUB1	MYND domain-containing protein; required for ubiquitination and turnover of Rpn4p; interacts with Ubr2p (E3) and indirectly with Rad6p (E2); short-lived protein degraded in a Ubr2p/Rad6p dependent manner; similar to the A. nidulans samB gene				308	418	213	332	273.322	404.386		338.854	2.14971	0.565134
CAGL0L13090g	NDT80	2247	411741	ChrL	1397800	1400046	W	CAGL-IPF8538|CAGL-CDS0945.1|CAG62312.1		CAL0136074	NDT80	YHR124W	YHR124W	Anc_2.135	YHR124W	NDT80	Meiosis-specific transcription factor; required for exit from pachytene and for full meiotic recombination; activates middle sporulation genes; competes with Sum1p for binding to promoters containing middle sporulation elements (MSE)				414	588	314	420	382.427	540.91		461.668	2.13942	0.500204		0
CAGL0E03960g		894	131034	ChrE	376571	377464	W	CAGL-IPF2478|CAGL-CDS3621.1|CAG58778.1		CAL0128794	SBP1	YLL046C	YHL034C	Anc_4.007	YHL034C	SBP1	Protein that binds eIF4G and has a role in repression of translation; has an RGG motif; found in cytoplasmic P bodies; found associated with small nucleolar RNAs snR10 and snR11; SBP1 has a paralog, RNP1, that arose from the whole genome duplication				236	348	171	261	213.99	327.816		270.903	2.13825	0.615337
CAGL0G00286g	GAS1	1680	-32704	ChrG	28918	27239	C	CAGL-IPF8924|CAGL-CDS1723.1|CAG59304.1		CAL0130779			YMR307W	Anc_5.013	YMR307W	GAS1	Beta-1,3-glucanosyltransferase; required for cell wall assembly and also has a role in transcriptional silencing; localizes to the cell surface via a glycosylphosphatidylinositol (GPI) anchor; also found at the nuclear periphery	dup			4066	5037	3957	4461	4232.11	5131.42		4681.76	2.13502	0.277979
CAGL0F00583g		1119	-166168	ChrF	60636	59518	C	CAGL-IPF3785|CAGL-CDS2964.1|CAG58923.1		CAL0131014	GRH1	YDR517W	YDR517W	Anc_1.032	YDR517W	GRH1	Acetylated cis-Golgi protein, involved in ER to Golgi transport; homolog of human GRASP65; forms a complex with the coiled-coil protein Bug1p; mutants are compromised for the fusion of ER-derived vesicles with Golgi membranes; protein abundance increases in response to DNA replication stress				264	413	278	365	287.429	421.207		354.318	2.13416	0.551325
CAGL0J00539g	SLT2	1467	-169549	ChrJ	47095	48561	W	CAGL-IPF7793|CAGL-CDS2134.1|CAG60682.1		CAL0133196	SLT2	YKL161C	YHR030C	Anc_5.274	YHR030C	SLT2	Serine/threonine MAP kinase; involved in regulating maintenance of cell wall integrity, cell cycle progression, and nuclear mRNA retention in heat shock; required for mitophagy and pexophagy; affects recruitment of mitochondria to phagophore assembly site (PAS); plays a role in adaptive response of cells to cold; regulated by the PKC1-mediated signaling pathway; SLT2 has a paralog, KDX1, that aro…				1134	1359	928	1221	1083.5	1395.4		1239.45	2.13135	0.36497		-1
CAGL0A03608g		645	289306	ChrA	366934	366290	C	CAGL-IPF1222|CAGL-CDS4309.1|CAG57817.1		CAL0126811							#N/A				1	19	7	33	5.3885	29.8215		17.605	2.12728	2.4684
CAGL0K02981g		837	8312	ChrK	265614	266450	W	CAGL-IPF2221|CAGL-CDS3765.1|CAG61315.1		CAL0134625	NAT4	YMR069W	YMR069W	Anc_2.532	YMR069W	NAT4	N alpha-acetyl-transferase; involved in acetylation of the N-terminal residues of histones H4 and H2A				286	436	247	331	281.208	412.8		347.005	2.12637	0.553805
CAGL0C05313g		2520	85378	ChrC	506270	508789	W	CAGL-IPF4087|CAGL-CDS0713.1|CAG58311.1		CAL0127202		YDL040C	YDL040C	Anc_3.153	YDL040C	NAT1	Subunit of protein N-terminal acetyltransferase NatA; NatA is comprised of Nat1p, Ard1p, and Nat5p; N-terminally acetylates many proteins, which influences multiple processes such as the cell cycle, heat-shock resistance, mating, sporulation, and telomeric silencing				496	605	426	622	485.643	667.681		576.662	2.12489	0.459263
CAGL0H07161g		1275	-249603	ChrH	706097	704823	C	CAGL-IPF248|CAGL-CDS2608.1|CAG60041.1		CAL0131978	HIM1	YDR317W	YDR317W	Anc_5.348	YDR317W	HIM1	Protein of unknown function involved in DNA repair				27	111	34	42	33.387	81.091		57.239	2.12324	1.28026
CAGL0M11374g		2955	70641	ChrM	1121727	1118773	C	CAGL-IPF6235|CAGL-CDS0464.1|CAG62815.1		CAL0136303		YJL176C	YJL176C	Anc_1.163	YJL176C	SWI3	Subunit of the SWI/SNF chromatin remodeling complex; SWI/SNF regulates transcription by remodeling chromosomes; contains SANT domain that is required for SWI/SNF assembly; is essential for displacement of histone H2A-H2B dimers during ATP-dependent remodeling; required for transcription of many genes, including ADH1, ADH2, GAL1, HO, INO1 and SUC2; relocates to the cytosol under hypoxic conditions				130	242	125	175	135.438	224.463		179.95	2.12219	0.728847
CAGL0M10307g		1347	-16935	ChrM	1032001	1033347	W	CAGL-IPF8355|CAGL-CDS2418.1|CAG62773.1		CAL0136931	AUR1		YKL004W	Anc_2.507	YKL004W	AUR1	Phosphatidylinositol:ceramide phosphoinositol transferase; required for sphingolipid synthesis; can mutate to confer aureobasidin A resistance; also known as IPC synthase	dup			72	149	41	77	59.7755	120.584		90.1795	2.12162	1.01241
CAGL0M12496g		2071	195597	ChrM	1246241	1244171	C	CAGL-IPF8468|CAGL-CDS1923.1|CAGL-IPF9858|CAGL-CDS3775.1|CAGL0M12507g		CAL0136645				Anc_7.246	YIL056W	VHR1					532	686	633	830	618.631	829.965		724.298	2.11534	0.42397
CAGL0H03333g		408	-642778	ChrH	312081	312488	W	CAGL-IPF1936|CAGL-CDS5022.1|CAG59871.1		CAL0132020	MPC1	YGL080W	YGL080W	Anc_6.199	YGL080W	FMP37	Highly conserved subunit of the mitochondrial pyruvate carrier; a mitochondrial inner membrane complex comprised of Fmp37p/Mpc1p and either Mpc2p or Fmp43p/Mpc3p mediates mitochondrial pyruvate uptake; null mutant displays slow growth that is complemented by expression of human or mouse ortholog; mutation in human ortholog is associated with lactic acidosis and hyperpyruvatemia				3	45	18	37	12.499	45.1635		28.8313	2.11518	1.85334
CAGL0J07920g		2424	555735	ChrJ	774323	771900	C	CAGL-IPF6753|CAGL-CDS0793.1|CAG61003.1		CAL0132972	FOL1	YNL256W	YNL256W	Anc_1.104	YNL256W	FOL1	Multifunctional enzyme of the folic acid biosynthesis pathway; has dihydropteroate synthetase, dihydro-6-hydroxymethylpterin pyrophosphokinase, and dihydroneopterin aldolase activities				114	263	121	133	125.216	210.371		167.793	2.1116	0.748526
CAGL0L00979g		1428	-872283	ChrL	114185	115612	W	CAGL-IPF8896|CAGL-CDS2231.1|CAG61786.1		CAL0135326	TED1	YIL039W	YIL039W	Anc_7.216	YIL039W	TED1	Conserved phosphoesterase domain-containing protein; acts together with Emp24p/Erv25p in cargo exit from the ER; deletion confers sensitivity to 4-(N-(S-glutathionylacetyl)amino) phenylarsenoxide (GSAO)				273	391	215	315	256.933	380.933		318.933	2.10985	0.568146
CAGL0L12584g		885	367423	ChrL	1355047	1354163	C	CAGL-IPF8588|CAGL-CDS3662.1|CAG62289.1		CAL0135878	YPL039W	YPL039W	YPL039W	Anc_8.487	YPL039W		Putative protein of unknown function; YPL039W is not an essential gene				211	324	194	279	214.267	326.355		270.311	2.10747	0.60703
CAGL0L11484g		1314	236412	ChrL	1222937	1224250	W	CAGL-IPF4239|CAGL-CDS2497.1|CAG62241.1		CAL0135700	FPR3		YML074C	Anc_4.342	YML074C	FPR3	Nucleolar peptidyl-prolyl cis-trans isomerase (PPIase); FK506 binding protein; phosphorylated by casein kinase II (Cka1p-Cka2p-Ckb1p-Ckb2p) and dephosphorylated by Ptp1p; FPR3 has a paralog, FPR4, that arose from the whole genome duplication	dup			599	737	414	600	530.477	720.8		625.639	2.10367	0.442309
CAGL0M12551g		495	197625	ChrM	1246987	1247481	W	CAGL-IPF8470|CAGL-CDS4704.1|CAG62868.1		CAL0136579	RGI2	YIL057C	YIL057C	Anc_7.248	YIL057C	RGI2	Protein of unknown function; involved in energy metabolism under respiratory conditions; expression induced under carbon limitation and repressed under high glucose; RGI2 has a paralog, RGI1, that arose from the whole genome duplication	dup			116	214	105	156	117.328	199.338		158.333	2.10062	0.764676
CAGL0H02475g		2409	-729782	ChrH	224077	226485	W	CAGL-IPF8741|CAGL-CDS0809.1|CAG59836.1		CAL0129647	PET111	YMR257C	YMR257C	Anc_8.809	YMR257C	PET111	Mitochondrial translational activator specific for the COX2 mRNA; located in the mitochondrial inner membrane				484	736	433	501	483.531	662.336		572.933	2.09565	0.453952
CAGL0G07271g		588	629326	ChrG	690402	689815	C	TSA1|CAGL-IPF7080|CAGL-CDS4485.1|CAG59604.1		CAL0137527	TSA1		YML028W	Anc_5.569	YML028W	TSA1	Thioredoxin peroxidase; acts as both a ribosome-associated and free cytoplasmic antioxidant; self-associates to form a high-molecular weight chaperone complex under oxidative stress; deletion results in mutator phenotype; protein abundance increases and forms cytoplasmic foci in response to DNA replication stress; required for telomere length maintenace; TSA1 has a paralog, TSA2, that arose from …	dup			997	1151	801	1103	944.456	1222.31		1083.38	2.09431	0.372051
CAGL0M10373g		1401	-12213	ChrM	1038096	1036696	C	CAGL-IPF8943|CAGL-CDS2283.1|CAG62776.1		CAL0136255	RAD57	YDR004W	YDR004W	Anc_3.198	YDR004W	RAD57	Protein that stimulates strand exchange; stimulates strand exchange by stabilizing the binding of Rad51p to single-stranded DNA; involved in the recombinational repair of double-strand breaks in DNA during vegetative growth and meiosis; forms heterodimer with Rad55p				47	126	65	97	60.6075	120.793		90.7005	2.09111	0.994975
CAGL0L03355g		948	-603191	ChrL	384464	383517	C	CAGL-IPF2723|CAGL-CDS3455.1|CAG61888.1		CAL0135880	YKR045C	YKR045C	YKR045C	Anc_1.237	YKR045C		Putative protein of unknown function; epitope-tagged protein localizes to the cytoplasm				951	1214	683	865	855.907	1114.46		985.182	2.08651	0.380816
CAGL0M11264g		1650	59678	ChrM	1110111	1108462	C	CAGL-IPF8828|CAGL-CDS1775.1|CAG62810.1		CAL0137513	TAF7	YMR227C	YMR227C	Anc_8.754	YMR227C	TAF7	TFIID subunit (67 kDa); involved in RNA polymerase II transcription initiation				301	557	348	359	344.814	489.695		417.254	2.08515	0.506064
CAGL0D03652g		2106	-186406	ChrD	369234	367129	C	CAGL-IPF4737|CAGL-CDS1129.1|CAG58485.1		CAL0128401		YMR179W	YMR179W	Anc_6.252	YMR179W	SPT21	Protein with a role in transcriptional silencing; required for normal transcription at several loci including HTA2-HTB2 and HHF2-HHT2, but not required at the other histone loci; functionally related to Spt10p; localizes to nuclear foci that become diffuse upon DNA replication stress				61	115	62	119	65.941	128.175		97.0578	2.08436	0.958862
CAGL0F04565g		1362	233900	ChrF	459464	460825	W	CAGL-IPF1671|CAGL-CDS2358.1|CAG59094.1		CAL0129337	COR1	YBL045C	YBL045C	Anc_7.484	YBL045C	COR1	Core subunit of the ubiquinol-cytochrome c reductase complex; the ubiquinol-cytochrome c reductase complex (bc1 complex) is a component of the mitochondrial inner membrane electron transport chain				290	361	190	326	251.545	372.373		311.959	2.0831	0.565932
CAGL0G09691g		1188	861846	ChrG	923222	922035	C	CAGL-IPF1541|CAGL-CDS2793.1|CAG59708.1		CAL0137713	SER1	YOR184W	YOR184W	Anc_6.084	YOR184W	SER1	3-phosphoserine aminotransferase; catalyzes the formation of phosphoserine from 3-phosphohydroxypyruvate, required for serine and glycine biosynthesis; regulated by the general control of amino acid biosynthesis mediated by Gcn4p; protein abundance increases in response to DNA replication stress				0	21	1	10	1.5555	17.355		9.45525	2.08282	3.4799
CAGL0H06963g		1554	-264338	ChrH	689948	691501	W	CAGL-IPF262|CAGL-CDS1968.1|CAG60032.1		CAL0129996	YML096W	YML096W	YML096W	Anc_8.875	YML096W		Putative protein with similarity to asparagine synthetases; green fluorescent protein (GFP)-fusion protein localizes to the cytoplasm; YML096W is not an essential gene and partially overlaps the verified gene RAD10				373	541	299	391	353.595	500.43		427.013	2.08247	0.501074
CAGL0L12848g		1674	387820	ChrL	1375838	1374165	C	CAGL-IPF9363|CAGL-CDS1733.1|CAG62301.1		CAL0135414	FAR8	YMR029C	YMR029C	Anc_2.583	YMR029C	FAR8	Protein involved in recovery from arrest in response to pheromone; acts in a cell cycle arrest recovery pathway independent from Far1p; interacts with Far3p, Far7p, Far9p, Far10p, and Far11p				123	247	167	212	155.269	248.626		201.947	2.08177	0.679212
CAGL0J03542g		1515	122136	ChrJ	340270	338756	C	CAGL-IPF6898|CAGL-CDS2057.1|CAG60807.1		CAL0132884	ATG15	YCR068W	YCR068W	Anc_6.335	YCR068W	ATG15	Lipase required for intravacuolar lysis of autophagic and Cvt bodies; targeted to intravacuolar vesicles during autophagy via the multivesicular body (MVB) pathway				150	254	129	189	147.659	238.66		193.159	2.08172	0.69268
CAGL0C05181g		1446	73259	ChrC	496133	494688	C	CAGL-IPF4096|CAGL-CDS2185.1|CAG58305.1		CAL0127250	PRS5	YOL061W	YOL061W	Anc_3.166	YOL061W	PRS5	5-phospho-ribosyl-1(alpha)-pyrophosphate synthetase; synthesizes PRPP, which is required for nucleotide, histidine, and tryptophan biosynthesis; one of five related enzymes, which are active as heteromultimeric complexes; forms cytoplasmic foci upon DNA replication stress				460	628	345	462	422.648	585.501		504.074	2.07579	0.470217
CAGL0M00462g		1836	-991565	ChrM	57126	58961	W	CAGL-IPF5418|CAGL-CDS1446.1|CAG62341.1		CAL0137245	SGM1	YJR134C	YJR134C	Anc_4.364	YJR134C	SGM1	Protein of unknown function; required for wild-type growth rate on galactose and mannose; localizes to COPI coated vesicles and the Golgi apparatus				556	819	542	628	580.081	778.194		679.138	2.07136	0.423875
CAGL0D06424g	ACO1	2334	51686	ChrD	607440	605107	C	CAGL-IPF8573|CAGL-CDS0863.1|CAG58595.1		CAL0127945	ACO1	YLR304C	YLR304C	Anc_4.051	YLR304C	ACO1	Aconitase; required for the tricarboxylic acid (TCA) cycle and also independently required for mitochondrial genome maintenance; phosphorylated; component of the mitochondrial nucleoid; mutation leads to glutamate auxotrophy				2	43	6	11	5.333	28.9405		17.1367	2.07034	2.44007		0
CAGL0K10208g		930	737441	ChrK	995625	994696	C	CAGL-IPF3210|CAGL-CDS3524.1|CAG61626.1		CAL0134435	PPH3	YDR075W	YDR075W	Anc_8.199	YDR075W	PPH3	Catalytic subunit of protein phosphatase PP4 complex; active complex is composed of Pph3p and Psy2p, with Psy4p apparently providing additional substrate specificity in some cases; regulates recovery from the DNA damage checkpoint and also the gene conversion- and single-strand annealing-mediated pathways of meiotic double-strand break repair; involved in activation of Gln3p to alleviate nitrogen…				35	64	21	71	30.1655	74.5705		52.368	2.06567	1.30571
CAGL0J04598g		1077	220891	ChrJ	437730	438806	W	CAGL-IPF7045|CAGL-CDS3096.1|CAG60855.1		CAL0133520	URA4	YLR420W	YLR420W	Anc_4.294	YLR420W	URA4	Dihydroorotase; catalyzes the third enzymatic step in the de novo biosynthesis of pyrimidines, converting carbamoyl-L-aspartate into dihydroorotate				75	171	139	186	115.715	195.403		155.559	2.05963	0.755883
CAGL0K03135g		360	32079	ChrK	289978	289619	C	CAGL-IPF2210|CAGL-CDS5188.1|CAG61322.1		CAL0134337	RPS20	YHL015W	YHL015W	Anc_2.550	YHL015W	RPS20	Protein component of the small (40S) ribosomal subunit; overproduction suppresses mutations affecting RNA polymerase III-dependent transcription; homologous to mammalian ribosomal protein S20 and bacterial S10				12	61	28	52	22.554	61.946		42.25	2.05437	1.45763
CAGL0J07480g		2931	506696	ChrJ	725538	722608	C	CAGL-IPF2381|CAGL-CDS0476.1|CAG60983.1		CAL0133300	BNI4	YNL233W	YNL233W	Anc_2.010	YNL233W	BNI4	Targeting subunit for Glc7p protein phosphatase; localized to the bud neck, required for localization of chitin synthase III to the bud neck via interaction with the chitin synthase III regulatory subunit Skt5p				194	297	199	284	208.544	315.782		262.163	2.05182	0.598574
CAGL0B03179g		2784	-139971	ChrB	312599	309816	C	CAGL-IPF798|CAGL-CDS0560.1|CAG58009.1		CAL0127062	TOF2	YKR010C	YKR010C	Anc_1.294	YKR010C	TOF2	Protein required for rDNA silencing and mitotic rDNA condensation; stimulates Cdc14p phosphatase activity and biphasic release to promote rDNA repeat segregation; required for condensin recruitment to the replication fork barrier site; TOF2 has a paralog, NET1, that arose from the whole genome duplication	dup			120	170	101	189	117.106	196.66		156.882	2.04583	0.747891
CAGL0E01045g		642	-151398	ChrE	94265	94906	W	CAGL-IPF5533|CAGL-CDS4318.1|CAG58652.1		CAL0128834	NBP2	YDR162C	YDR162C	Anc_8.344	YDR162C	NBP2	Protein involved in the HOG (high osmolarity glycerol) pathway; negatively regulates Hog1p by recruitment of phosphatase Ptc1p the Pbs2p-Hog1p complex; interacts with Bck1p and down regulates the cell wall integrity pathway; found in the nucleus and cytoplasm, contains an SH3 domain and a Ptc1p binding domain (PBM)				165	266	196	274	192.378	294.427		243.403	2.03987	0.613966
CAGL0M08712g		2292	-182009	ChrM	866454	868745	W	CAGL-IPF8152|CAGL-CDS0904.1|CAG62700.1		CAL0137231	AKR1	YOR034C	YDR264C	Anc_5.626	YDR264C	AKR1	Palmitoyl transferase involved in protein palmitoylation; acts as a negative regulator of pheromone response pathway; required for endocytosis of pheromone receptors; involved in cell shape control; contains ankyrin repeats; AKR1 has a paralog, AKR2, that arose from the whole genome duplication				15	86	18	18	18.499	54.539		36.519	2.02995	1.55984
CAGL0I02486g	ENO1	1314	-571258	ChrI	220865	222178	W	CAGL-IPF8074|CAGL-CDS2501.1|CAG60297.1		CAL0130514	ENO2		YHR174W	Anc_5.062	YHR174W	ENO2	Enolase II, a phosphopyruvate hydratase; catalyzes conversion of 2-phosphoglycerate to phosphoenolpyruvate during glycolysis and the reverse reaction during gluconeogenesis; expression induced in response to glucose; ENO2 has a paralog, ENO1, that arose from the whole genome duplication	dup			4	39	9	24	7.9995	34.552		21.2757	2.02827	2.11079
CAGL0E01067g		1137	-150098	ChrE	96454	95318	C	CAGL-IPF5532|CAGL-CDS2916.1|CAG58653.1		CAL0128674	ACL4	YDR161W	YDR161W	Anc_8.343	YDR161W		Putative protein of unknown function; non-essential gene; proposed function in rRNA and ribosome biosynthesis based on transcriptional co-regulation; genetic interactions suggest a role in ER-associated protein degradation (ERAD)				166	288	164	216	175.102	271.468		223.285	2.02561	0.632587
CAGL0K10120g		330	730700	ChrK	988584	988255	C	CAGL-IPF3202|CAGL-CDS5361.1|CAG61622.1		CAL0134557	PET100	YDR079W	YDR079W	Anc_8.209	YDR079W	PET100	Chaperone that facilitates the assembly of cytochrome c oxidase; integral to the mitochondrial inner membrane; interacts with a subcomplex of subunits VII, VIIa, and VIII (Cox7p, Cox9p, and Cox8p) but not with the holoenzyme				90	128	38	107	67.109	127.649		97.3787	2.0197	0.927598
CAGL0A02860g		1209	224034	ChrA	301944	300736	C	CAGL-IPF1277|CAGL-CDS2753.1|CAG57783.1		CAL0126611	DXO1	YDR370C	YDR370C	Anc_5.437	YDR370C	DXO1	Protein with decapping and 5'-3' exoRNase activity; similar to Rai1p				342	505	271	347	322.541	456.668		389.605	2.01425	0.501667
CAGL0K10296g		747	746221	ChrK	1004314	1003568	C	CAGL-IPF3214|CAGL-CDS4018.1|CAG61630.1		CAL0134649	IAH1	YOR126C	YOR126C	Anc_5.449	YOR126C	IAH1	Isoamyl acetate-hydrolyzing esterase; required in balance with alcohol acetyltransferase to maintain optimal amounts of isoamyl acetate, which is particularly important in sake brewing				154	212	205	316	191.877	292.018		241.948	2.00787	0.605872
CAGL0I03850g		609	-457148	ChrI	335936	335328	C	CAGL-IPF5959|CAGL-CDS4434.1|CAG60353.1		CAL0132560	SCM3	YDL139C	YDL139C	Anc_7.312	YDL139C	SCM3	Nonhistone component of centromeric chromatin; binds to histone H3 variant, Cse4p, and recruits it to centromeres; involved in the assembly and maintenance of Cse4-H4 at centromeres; required for kinetochore assembly and G2/M progression; may protect Cse4p from ubiquitylation; homolog of mammalian HJURP				0	12	5	29	3.7775	23.9795		13.8785	2.00111	2.6663
CAGL0C01441g		3018	-263713	ChrC	159947	156930	C	CAGL-IPF7245|CAGL-CDS0442.1|CAG58143.1		CAL0127184	RTT10	YPL183C	YPL183C	Anc_6.177	YPL183C	RTT10	WD40 domain-containing protein involved in endosomal recycling; forms a complex with Rrt2p that functions in the retromer-mediated pathway for recycling internalized cell-surface proteins; evidence it interacts with Trm7p for 2'-O-methylation of N34 of substrate tRNAs; has a role in regulation of Ty1 transposition; human ortholog is WDR6				244	360	154	225	208.547	312.738		260.642	1.99899	0.58458
CAGL0A00363g		2355	-42134	ChrA	36349	33995	C	CAGL-IPF3317|CAGL-CDS0848.1|CAG57679.1		CAL0126799	LEU1	YGL009C	YGL009C	Anc_4.107	YGL009C	LEU1	Isopropylmalate isomerase; catalyzes the second step in the leucine biosynthesis pathway				1859	2411	1713	1897	1882.07	2317.19		2099.63	1.99003	0.300057
CAGL0G01188g		657	52443	ChrG	112898	113554	W	CAGL-IPF3871|CAGL-CDS4264.1|CAG59340.1		CAL0130771	ORM2	YLR350W	YLR350W	Anc_4.182	YLR350W	ORM2	Protein of unknown function; evolutionarily conserved, required for resistance to agents that induce unfolded protein response; Orm1p and Orm2p together control membrane biogenesis by coordinating lipid homeostasis with protein quality control; protein abundance increases in response to DNA replication stress; ORM2 has a paralog, ORM1, that arose from the whole genome duplication	dup			565	707	496	665	559.028	743.858		651.443	1.98652	0.412106
CAGL0A00473g		2361	-24989	ChrA	53497	51137	C	CAGL-IPF3326|CAGL-CDS0843.1|CAG57684.1		CAL0126703	PUF4	YGL014W	YGL014W	Anc_4.114	YGL014W	PUF4	Member of the PUF protein family; PUF family is defined by the presence of Pumilio homology domains that confer RNA binding activity; preferentially binds mRNAs encoding nucleolar ribosomal RNA-processing factors				468	638	486	611	504.973	677.74		591.357	1.98111	0.424527
CAGL0I09394g		402	109520	ChrI	902500	902099	C	CAGL-IPF7746|CAGL-CDS5019.1|CAG60592.1		CAL0132420	SDH8	YBR269C	YBR269C	Anc_1.320	YBR269C	FMP21	Putative protein of unknown function; the authentic, non-tagged protein is detected in highly purified mitochondria in high-throughput studies				146	269	154	194	159.547	249.087		204.317	1.97989	0.642668
CAGL0G01452g		755	77162	ChrG	137568	138322	W	CAGL-IPF3851|CAGL-CDS4829.1|CAG59352.1		CAL0137569	YIP3	YNL044W	YNL044W	Anc_2.269	YNL044W	YIP3	Protein localized to COPII vesicles; proposed to be involved in ER to Golgi transport; interacts with members of the Rab GTPase family and Yip1p; also interacts with Rtn1p				544	810	418	464	505.199	677.672		591.436	1.9775	0.423735
CAGL0H08525g		306	-119830	ChrH	835080	835385	W	CAGL-IPF146|CAGL-CDS5559.1|CAG60103.1		CAL0131780		YBR091C	YBR091C	Anc_3.334	YBR091C	TIM12	Essential protein of the inner mitochondrial membrane; peripherally localized; component of the TIM22 complex, which is a twin-pore translocase that mediates insertion of numerous multispanning inner membrane proteins				439	583	421	552	454.365	615.696		535.031	1.97628	0.438365
CAGL0L12012g		882	305952	ChrL	1293574	1292693	C	CAGL-IPF8336|CAGL-CDS3673.1|CAG62264.1		CAL0136020	TMT1	YER175C	YER175C	Anc_8.241	YER175C	TMT1	Trans-aconitate methyltransferase; cytosolic enzyme that catalyzes the methyl esterification of 3-isopropylmalate, an intermediate of the leucine biosynthetic pathway, and trans-aconitate, which inhibits the citric acid cycle				540	806	552	617	577.636	765.254		671.445	1.97555	0.405777
CAGL0M10978g		1842	39590	ChrM	1090119	1088278	C	CAGL-IPF8848|CAGL-CDS1434.1|CAG62800.1		CAL0136581				Anc_6.347			#N/A				511	713	441	538	501.476	672.499		586.987	1.97065	0.423353
CAGL0G08954g		1773	797119	ChrG	858788	857016	C	CAGL-IPF1592|CAGL-CDS1557.1|CAG59679.1		CAL0130775	YOL019W	YOL019W	YOL019W	Anc_1.371	YOL019W		Protein of unknown function; green fluorescent protein (GFP)-fusion protein localizes to the cell periphery and vacuole; YOL019W has a paralog, DCV1, that arose from the whole genome duplication				643	800	516	686	609.138	802.653		705.895	1.96947	0.398007
CAGL0L01067g		618	-864157	ChrL	122716	123333	W	CAGL-IPF8890|CAGL-CDS4409.1|CAG61790.1		CAL0135936	PAR32	YDL173W	YDL173W	Anc_7.362	YDL173W	PAR32	Putative protein of unknown function; hyperphosphorylated upon rapamycin treatment in a Tap42p-dependent manner; green fluorescent protein (GFP)-fusion protein localizes to the cytoplasm; PAR32 is not an essential gene				354	560	256	289	320.208	450.21		385.209	1.96526	0.491587
CAGL0G02299g		3174	143155	ChrG	202351	205524	W	CAGL-IPF3551|CAGL-CDS0366.1|CAG59389.1		CAL0137549	PRP16	YKR086W	YKR086W	Anc_5.683	YKR086W	PRP16	DEAH-box RNA helicase involved in second catalytic step of splicing; exhibits ATP-dependent RNA unwinding activity; mediates the release of Yju2p and Cwc25p in the second step; in the absence of ATP, stabilizes the binding of Cwc25p to the spliceosome in the first catalytic step				35	58	30	85	35.165	79.7675		57.4663	1.96382	1.18166
CAGL0I05214g	CAP2	813	-297011	ChrI	496175	495363	C	CAGL-IPF1336|CAGL-CDS3827.1|CAG60414.1		CAL0130003	CAP2	YIL034C	YIL034C	Anc_7.208	YIL034C	CAP2	Beta subunit of the capping protein heterodimer (Cap1p and Cap2p); capping protein (CP) binds to the barbed ends of actin filaments preventing further polymerization; localized predominantly to cortical actin patches; protein increases in abundance and relocalizes from bud neck to plasma membrane upon DNA replication stress				65	142	97	139	87.3835	153.385		120.384	1.96018	0.81172
CAGL0J07282g		2874	487094	ChrJ	705907	703034	C	CAGL-IPF2370|CAGL-CDS0500.1|CAG60974.1		CAL0133526	GPB1		YOR371C	Anc_7.009	YOR371C	GPB1	Multistep regulator of cAMP-PKA signaling; inhibits PKA downstream of Gpa2p and Cyr1p, thereby increasing cAMP dependency; promotes ubiquitin-dependent proteolysis of Ira2p; regulated by G-alpha protein Gpa2p; GPB1 has a paralog, GPB2, that arose from the whole genome duplication	dup			1473	2012	1264	1336	1439.65	1789.23		1614.44	1.95852	0.313617		0
CAGL0B04719g		1006	3621	ChrB	454297	455302	W	CAGL-IPF670|CAGL-CDS4225.1|CAG58075.2		CAL0127666		YCL002C	YCL002C	Anc_1.416	YCL002C		Putative protein of unknown function; YCL002C is not an essential gene				1238	1613	1183	1348	1277.16	1596.75		1436.96	1.95518	0.322207
CAGL0M07656g	ERG5	1608	-283033	ChrM	765772	767379	W	CAGL-IPF9226|CAGL-CDS1868.1|CAG62657.1		CAL0137223	ERG5	YMR015C	YMR015C	Anc_2.562	YMR015C	ERG5	C-22 sterol desaturase; a cytochrome P450 enzyme that catalyzes the formation of the C-22(23) double bond in the sterol side chain in ergosterol biosynthesis; may be a target of azole antifungal drugs				65	113	59	114	66.2745	124.247		95.2608	1.95274	0.906685		0
CAGL0D03938g		1872	-161219	ChrD	392433	394304	W	CAGL-IPF4713|CAGL-CDS1381.1|CAG58498.1		CAL0128385	NEL1	YHR035W	YHR035W	Anc_5.312	YHR035W		Putative protein of unknown function; not an essential gene				539	722	473	593	533.252	709.202		621.226	1.95194	0.411379
CAGL0C01309g		3333	-284216	ChrC	136270	139602	W	CAGL-IPF7232|CAGL-CDS0312.1|CAG58137.1		CAL0127524	HOS4	YIL112W	YIL112W	Anc_2.257	YIL112W	HOS4	Subunit of the Set3 complex; complex is a meiotic-specific repressor of sporulation specific genes that contains deacetylase activity; potential Cdc28p substrate				1165	1602	854	913	1057.9	1336.56		1197.23	1.9517	0.337327
CAGL0E04114g		1500	151576	ChrE	398309	396810	C	CAGL-IPF2487|CAGL-CDS2078.1|CAG58785.1		CAL0128904	AFG1	YEL052W	YEL052W	Anc_5.520	YEL052W	AFG1	Protein that may act as a chaperone for cytochrome c oxidase subunits; conserved protein; may act as a chaperone in the degradation of misfolded or unassembled cytochrome c oxidase subunits; localized to matrix face of the mitochondrial inner membrane; member of the AAA family but lacks a protease domain				560	802	446	515	528.753	703.533		616.143	1.94961	0.412023
CAGL0L10428g		1869	129647	ChrL	1115895	1117763	W	CAGL-IPF4158|CAGL-CDS1388.1|CAG62194.1		CAL0136032	MSA1		YOR066W	Anc_5.668	YOR066W	MSA1	Activator of G1-specific transcription factors MBF and SBF; involved in regulation of the timing of G1-specific gene transcription and cell cycle initiation; localization is cell-cycle dependent and regulated by Cdc28p phosphorylation; MSA1 has a paralog, MSA2, that arose from the whole genome duplication	dup			163	278	130	173	154.715	241.291		198.003	1.94814	0.641164
CAGL0J05390g		333	299659	ChrJ	517202	516870	C	CAGL-IPF7923|CAGL-CDS5342.1|CAG60890.1		CAL0133198							#N/A				305	546	326	329	334.593	466.63		400.611	1.9472	0.47987
CAGL0K06413g		1080	371460	ChrK	628640	629719	W	CAGL-IPF5297|CAGL-CDS3083.1|CAG61463.1		CAL0133783	STP1		YDR463W	Anc_5.586	YDR463W	STP1	Transcription factor; undergoes proteolytic processing by SPS (Ssy1p-Ptr3p-Ssy5p)-sensor component Ssy5p in response to extracellular amino acids; activates transcription of amino acid permease genes and may have a role in tRNA processing; STP1 has a paralog, STP2, that arose from the whole genome duplication	dup			262	393	217	286	252.543	364.953		308.748	1.94707	0.531179		0
CAGL0L08536g		222	-52630	ChrL	934441	934662	W	CAGL-IPF12434|CAG62118.1		CAL0136164							#N/A				478	670	371	456	446.091	602.988		524.539	1.94661	0.434793
CAGL0M10769g		1689	25282	ChrM	1074047	1075735	W	CAGL-IPF9491|CAGL-CDS1715.1|CAG62793.1		CAL0136861	ALG12	YNR030W	YNR030W	Anc_6.338	YNR030W	ALG12	Alpha-1,6-mannosyltransferase localized to the ER; responsible for the addition of the alpha-1,6 mannose to dolichol-linked Man7GlcNAc2, acts in the dolichol pathway for N-glycosylation				991	1379	867	940	978.119	1240.87		1109.49	1.94516	0.343271
CAGL0K07788g		4125	518694	ChrK	778476	774352	C	CAGL-IPF3152|CAGL-CDS0150.1|CAG61522.1		CAL0133971	LYS2	YBR115C	YBR115C	Anc_3.369	YBR115C	LYS2	Alpha aminoadipate reductase; catalyzes the reduction of alpha-aminoadipate to alpha-aminoadipate 6-semialdehyde, which is the fifth step in biosynthesis of lysine; activation requires posttranslational phosphopantetheinylation by Lys5p				103	170	80	136	96.94	165.628		131.284	1.94501	0.772783
CAGL0K10934g		1800	811860	ChrK	1070479	1068680	C	CAGL-IPF3260|CAGL-CDS1509.1|CAG61654.1		CAL0134197	GYL1	YPL249C	YMR192W	Anc_6.281	YMR192W	GYL1	Putative GTPase activating protein (GAP) with a role in exocytosis; stimulates Gyp5p GAP activity on Ypt1p, colocalizes with Gyp5p at sites of polarized growth; interacts with Gyp5p, Rvs161p, and Rvs167p; involved in recruiting Rvs167p to the bud tip during polarized growth; increases in abundance and relocalizes from bud neck to cytoplasm upon DNA replication stress; GYL1 has a paralog, GYP5, th…	dup			255	422	284	332	286.262	406.386		346.324	1.93946	0.505515
CAGL0J10670g		3438	826126	ChrJ	1041784	1045221	W	CAGL-IPF2847|CAGL-CDS0370.1|CAG61126.1		CAL0133318	NMD2	YHR077C	YHR077C	Anc_5.363	YHR077C	NMD2	Protein involved in the nonsense-mediated mRNA decay (NMD) pathway; interacts with Nam7p and Upf3p; involved in telomere maintenance				82	171	100	136	97.55	166.128		131.839	1.93705	0.768081
CAGL0A04543g		1092	372046	ChrA	448806	449897	W	CAGL-IPF1130|CAGL-CDS3040.1|CAG57858.1		CAL0126543	AAR2	YBL074C	YBL074C	Anc_7.396	YBL074C	AAR2	Component of the U5 snRNP complex; required for splicing of U3 precursors; originally described as a splicing factor specifically required for splicing pre-mRNA of the MATa1 cistron				0	22	1	7	1.5555	16.0985		8.827	1.93704	3.37148
CAGL0C02497g		498	-172757	ChrC	249146	249643	W	CAGL-IPF1047|CAGL-CDS4689.1|CAG58191.1		CAL0127522	SMB1	YER029C	YER029C	Anc_3.519	YER029C	SMB1	Core Sm protein Sm B; part of heteroheptameric complex (with Smd1p, Smd2p, Smd3p, Sme1p, Smx3p, and Smx2p) that is part of the spliceosomal U1, U2, U4, and U5 snRNPs; homolog of human Sm B and Sm B'				65	166	67	78	70.7185	129.669		100.194	1.9315	0.874674
CAGL0E01111g		3588	-144431	ChrE	103346	99759	C	CAGL-IPF5526|CAGL-CDS0247.1|CAG58655.1		CAL0128988	SAC3	YDR159W	YDR159W	Anc_8.340	YDR159W	SAC3	Nuclear pore-associated protein; required for biogenesis of the small ribosomal subunit; component of TREX-2 complex (Sac3p-Thp1p-Sus1p-Cdc31p) involved in transcription elongation and mRNA export from the nucleus; involved in post-transcriptional tethering of active genes to the nuclear periphery and to non-nascent mRNP; similar to the human germinal center-associated nuclear protein (GANP)				346	519	282	341	330.651	460.156		395.403	1.92523	0.476812
CAGL0B03443g		1758	-108509	ChrB	343548	341791	C	CAGL-IPF775|CAGL-CDS1584.1|CAG58021.1		CAL0127838	MCP2	YLR253W	YLR253W	Anc_1.383	YLR253W	MCP2	Mitochondrial protein of unknown function involved in lipid homeostasis; integral membrane protein that localizes to the mitochondrial inner membrane; involved in mitochondrial morphology; non-essential gene which interacts genetically with MDM10, and other members of the ERMES complex; transcription is periodic during the metabolic cycle; homologous to human aarF domain containing kinase, ADCK1				556	810	523	588	569.526	750.274		659.9	1.92502	0.397655
CAGL0M10197g		720	-29626	ChrM	1019623	1020342	W	CAGL-IPF8368|CAGL-CDS4092.1|CAG62768.1		CAL0137229	MRT4	YKL009W	YKL009W	Anc_2.498	YKL009W	MRT4	Protein involved in mRNA turnover and ribosome assembly; localizes to the nucleolus				3	43	11	20	8.6105	34.21		21.4103	1.91934	1.99025
CAGL0J07260g		1917	484113	ChrJ	702448	700532	C	CAGL-IPF2369|CAGL-CDS1319.1|CAG60973.1		CAL0133498	MRS6	YOR370C	YOR370C	Anc_7.010	YOR370C	MRS6	Rab escort protein; forms a complex with the Ras-like small GTPase Ypt1p that is required for the prenylation of Ypt1p by protein geranylgeranyltransferase type II (Bet2p-Bet4p); sequence similarity to mammalian choroideraemia gene; relative distribution to the nucleus increases upon DNA replication stress				248	358	216	296	244.988	353.308		299.148	1.91166	0.528215
CAGL0I08437g		3993	34262	ChrI	825046	829038	W	CAGL-IPF4349|CAGL-CDS0170.1|CAG60552.1		CAL0132618			YPR164W	Anc_7.519	YPR164W	MMS1	Subunit of E3 ubiquitin ligase complex involved in replication repair; stabilizes protein components of the replication fork such as the fork-pausing complex and leading strand polymerase, preventing fork collapse and promoting efficient recovery during replication stress; regulates Ty1 transposition; involved with Rtt101p in nonfunctional rRNA decay	dup			338	475	302	391	337.761	467.43		402.596	1.90563	0.468749
CAGL0M02761g	TBF1	1578	-736667	ChrM	313730	312153	C	CAGL-IPF6588|CAGL-CDS1937.1|CAG62443.1		CAL0136313		YPL128C	YPL128C	Anc_8.630	YPL128C	TBF1	Telobox-containing general regulatory factor; binds TTAGGG repeats within subtelomeric anti-silencing regions (STARs), blocking silent chromatin propagation; binds majority of snoRNA gene promoters, required for full snoRNA expression; caps DSB flanked by long T2AG3 repeats and blocks checkpoint activation				34	78	23	54	30.7765	71.617		51.1968	1.90455	1.21847
CAGL0L06006g		2844	-313056	ChrL	675547	672704	C	CAGL-IPF4512|CAGL-CDS0528.1|CAG62006.1		CAL0135942	ATG1	YGL180W	YGL180W	Anc_8.141	YGL180W	ATG1	Protein serine/threonine kinase; required for vesicle formation in autophagy and the cytoplasm-to-vacuole targeting (Cvt) pathway; structurally required for phagophore assembly site formation; during autophagy forms a complex with Atg13p and Atg17p; essential for cell cycle progression from G2/M to G1 under nitrogen starvation				61	136	50	75	59.275	112.912		86.0938	1.90348	0.92971
CAGL0L10692g		1041	156382	ChrL	1144084	1143044	C	CAGL-IPF4180|CAGL-CDS3191.1|CAG62206.1		CAL0135904	RAD14	YMR201C	YMR201C	Anc_6.296	YMR201C	RAD14	Protein that recognizes and binds damaged DNA during NER; subunit of Nucleotide Excision Repair Factor 1 (NEF1); contains zinc finger motif; homolog of human XPA protein; NER stands for nucleotide excision repair				112	226	90	108	106.995	177.234		142.115	1.90234	0.728112
CAGL0F07447g		372	498890	ChrF	725320	724949	C	CAGL-IPF533|CAGL-CDS5140.1|CAG59215.1		CAL0131102	YGL108C	YGL108C	YGL108C	Anc_6.149	YGL108C		Protein of unknown function, predicted to be palmitoylated; green fluorescent protein (GFP)-fusion protein localizes to the cell periphery; protein abundance increases in response to DNA replication stress				123	294	179	171	161.935	248.12		205.028	1.89949	0.615631
CAGL0H04037g		2748	-574520	ChrH	381916	379169	C	CAGL-IPF1880|CAGL-CDS0578.1|CAG59903.1		CAL0131620	GAC1	YOR178C	YOR178C	Anc_6.070	YOR178C	GAC1	Regulatory subunit for Glc7p type-1 protein phosphatase (PP1); tethers Glc7p to Gsy2p glycogen synthase, binds Hsf1p heat shock transcription factor, required for induction of some HSF-regulated genes under heat shock; GAC1 has a paralog, PIG1, that arose from the whole genome duplication	dup			816	1124	692	771	793.406	1014.42		903.913	1.89402	0.354525
CAGL0F01749g		1410	-52720	ChrF	172820	174229	W	CAGL-IPF5755|CAGL-CDS2260.1|CAG58972.1		CAL0131260	SHM2	YLR058C	YLR058C	Anc_8.038	YLR058C	SHM2	Cytosolic serine hydroxymethyltransferase; converts serine to glycine plus 5,10 methylenetetrahydrofolate; major isoform involved in generating precursors for purine, pyrimidine, amino acid, and lipid biosynthesis				326	477	302	374	331.761	458.477		395.119	1.88391	0.466705
CAGL0F00495g		7431	-176724	ChrF	53236	45806	C	CAGL-IPF3790|CAGL-CDS0015.1|CAG58919.1		CAL0129782	TOR1		YJR066W	Anc_1.515	YJR066W	TOR1	PIK-related protein kinase and rapamycin target; subunit of TORC1, a complex that controls growth in response to nutrients by regulating translation, transcription, ribosome biogenesis, nutrient transport and autophagy; involved in meiosis; TOR1 has a paralog, TOR2, that arose from the whole genome duplication	dup			3	24	1	13	3.0555	20.6115		11.8335	1.88232	2.75397
CAGL0H04785g		2019	-497349	ChrH	458723	456705	C	CAGL-IPF4470|CAGL-CDS1186.1|CAG59936.1		CAL0130158	UBX2	YML013W	YML013W	Anc_5.543	YML013W	UBX2	Bridging factor involved in ER-associated protein degradation (ERAD); bridges the cytosolic Cdc48p-Npl1p-Ufd1p ATPase complex and the membrane associated Ssm4p and Hrd1p ubiquitin ligase complexes; contains a UBX (ubiquitin regulatory X) domain and a ubiquitin-associated (UBA) domain; redistributes from the ER to lipid droplets during the diauxic shift and stationary phase; required for the maint…				166	260	206	277	198.433	293.183		245.808	1.87885	0.563152
CAGL0D00924g		5943	-443276	ChrD	108341	114283	W	CAGL-IPF2619|CAGL-CDS0036.1|CAG58365.1		CAL0128209	USO1	YDL058W	YDL058W	Anc_4.238	YDL058W	USO1	Essential protein involved in vesicle-mediated ER to Golgi transport; binds membranes and functions during vesicle docking to the Golgi; required for assembly of the ER-to-Golgi SNARE complex				833	1171	727	784	821.349	1045.53		933.44	1.87785	0.348171
CAGL0L01265g		1581	-840684	ChrL	145708	147288	W	CAGL-IPF7402|CAGL-CDS1927.1|CAG61798.1		CAL0135552	YEF1	YJR049C	YEL041W	Anc_1.484	YEL041W	YEF1	ATP-NADH kinase; phosphorylates both NAD and NADH; homooctameric structure consisting of 60-kDa subunits; similar to Pos5p; overexpression complements certain pos5 phenotypes; YEF1 has a paralog, UTR1, that arose from the whole genome duplication	dup			242	328	208	302	237.544	341.821		289.683	1.87549	0.525046
CAGL0K10626g		2091	775858	ChrK	1034623	1032533	C	CAGL-IPF3229|CAGL-CDS1101.1|CAG61642.1		CAL0134357	GSY1		YFR015C	Anc_1.375	YFR015C	GSY1	Glycogen synthase; expression induced by glucose limitation, nitrogen starvation, environmental stress, and entry into stationary phase; GSY1 has a paralog, GSY2, that arose from the whole genome duplication; relocalizes from nucleus to cytoplasmic foci upon DNA replication stress	dup			2769	3211	2416	2847	2727.59	3273.42		3000.5	1.87545	0.263172
CAGL0J06600g	URA5	672	419134	ChrJ	636846	636175	C	CAGL-IPF2327|CAGL-CDS4222.1|CAG60944.1		CAL0133710	URA5	YMR271C	YML106W	Anc_8.827	YML106W	URA5	Major orotate phosphoribosyltransferase (OPRTase) isozyme; catalyzes the fifth enzymatic step in de novo biosynthesis of pyrimidines, converting orotate into orotidine-5'-phosphate; URA5 has a paralog, URA10, that arose from the whole genome duplication				10486	12866	9611	10046	10582.9	12315.9		11449.4	1.87427	0.218789
CAGL0C01595g		1659	-248943	ChrC	172380	174038	W	CAGL-IPF7262|CAGL-CDS1753.1|CAG58150.1		CAL0127528	HIS7	YBR248C	YBR248C	Anc_6.167	YBR248C	HIS7	Imidazole glycerol phosphate synthase; glutamine amidotransferase:cyclase that catalyzes the fifth step of histidine biosynthesis and also produces 5-aminoimidazole-4-carboxamide ribotide (AICAR), a purine precursor				628	878	527	599	607.748	790.715		699.231	1.87305	0.379682
CAGL0L05698g		1011	-357712	ChrL	628965	629975	W	CAGL-IPF4535|CAGL-CDS3281.1|CAG61993.1		CAL0135710	AIM23	YJL131C	YJL131C	Anc_1.222	YJL131C	AIM23	Mitochondrial translation initiation factor 3 (IF3, mIF3); evolutionarily conserved; binds to E. coli ribosomes in vitro; null mutant displays severe respiratory growth defect and elevated frequency of mitochondrial genome loss				170	237	144	226	165.992	251.823		208.908	1.87055	0.601296
CAGL0J10978g		1248	855158	ChrJ	1071911	1073158	W	CAGL-IPF2868|CAGL-CDS2667.1|CAG61140.1		CAL0133098	GIC2	YHR061C	YHR061C	Anc_5.331	YDR309C	GIC2	Redundant rho-like GTPase Cdc42p effector; involved in initiation of budding and cellular polarization; interacts with Cdc42p via the Cdc42/Rac-interactive binding (CRIB) domain and with PI(4,5)P2 via a polybasic region; GIC2 has a paralog, GIC1, that arose from the whole genome duplication	dup			88	148	81	134	89.9955	153.457		121.726	1.86914	0.76991
CAGL0H10582g		2373	75999	ChrH	1032248	1029876	C	CAGL-IPF8818|CAGL-CDS0837.1|CAG60191.1		CAL0130534	UBP1	YDL122W	YDL122W	Anc_2.307	YDL122W	UBP1	Ubiquitin-specific protease; removes ubiquitin from ubiquitinated proteins; cleaves at the C terminus of ubiquitin fusions irrespective of their size; capable of cleaving polyubiquitin chains				922	1188	788	926	899.734	1137.17		1018.45	1.86902	0.337881
CAGL0G09757g		4272	871704	ChrG	930351	934622	W	ZCF18|CAGL-IPF1535|CAGL-CDS0133.1|CAG59711.1		CAL0130673		YLR278C	YLR278C	Anc_6.075	YLR278C		Zinc-cluster protein; GFP-fusion protein localizes to the nucleus; mutant shows moderate growth defect on caffeine; has a prion-domain like fragment that increases frequency of [URE3]; YLR278C is not an essential gene				1117	1529	984	1050	1106.11	1380.28		1243.19	1.86707	0.319458		0
CAGL0L10450g		1653	131603	ChrL	1119611	1117959	C	CAGL-IPF4161|CAGL-CDS1761.1|CAG62195.1		CAL0135006	ALG8	YOR067C	YOR067C	Anc_5.669	YOR067C	ALG8	Glucosyl transferase; involved in N-linked glycosylation; adds glucose to the dolichol-linked oligosaccharide precursor prior to transfer to protein during lipid-linked oligosaccharide biosynthesis; similar to Alg6p				492	648	409	520	474.2	629.46		551.83	1.86213	0.408621
CAGL0L13431g		336	467251	ChrL	1454265	1454600	W	Novel_proteincoding42		CAL0000208619							#N/A				744	1113	468	447	632.974	819.218		726.096	1.85802	0.372102
CAGL0M05709g		1611	-441436	ChrM	607368	608978	W	CAGL-IPF7156|CAGL-CDS1863.1|CAG62570.1		CAL0137459	SGF73	YGL066W	YGL066W	Anc_6.218	YGL066W	SGF73	SAGA complex subunit; has a role in anchoring the deubiquitination module into SAGA and SLIK complexes; involved in preinitiation complex assembly at promoters; relocalizes to the cytosol in response to hypoxia; human ortholog ataxin-7 is associated with spinocerebellar ataxia diseases; mutant displays reduced transcription elongation in the G-less-based run-on (GLRO) assay				9	34	4	23	7.722	31.4665		19.5942	1.85779	2.02677
CAGL0K09152g		984	653057	ChrK	910285	911268	W	CAGL-IPF3054|CAGL-CDS3343.1|CAG61582.1		CAL0134829	ENV9	YOR246C	YOR246C	Anc_8.684	YOR246C	ENV9	Protein proposed to be involved in vacuolar functions; mutant shows defect in CPY processing and defects in vacuolar morphology; has similarity to oxidoreductases, found in lipid particles; required for replication of Brome mosaic virus in S. cerevisiae, a model system for studying replication of positive-strand RNA viruses in their natural hosts				136	184	93	171	120.661	193.12		156.891	1.85616	0.678536
CAGL0G02079g		1164	122769	ChrG	182970	184133	W	CAGL-IPF3535|CAGL-CDS2848.1|CAG59379.1		CAL0129309		YOR063W	YOR063W	Anc_5.664	YOR063W	RPL3	Ribosomal 60S subunit protein L3; homologous to mammalian ribosomal protein L3 and bacterial L3; involved in the replication and maintenance of killer double stranded RNA virus				70	119	45	91	60.9975	113.781		87.389	1.85538	0.899431
CAGL0G09493g		4227	843558	ChrG	906454	902228	C	CAGL-IPF1552|CAGL-CDS0142.1|CAG59699.1		CAL0130757	ULS1	YOR191W	YOR191W	Anc_6.100	YOR191W	ULS1	Protein involved in proteolytic control of sumoylated substrates; contains RING finger domain; interacts with SUMO (Smt3p); member of the SWI/SNF family of DNA-dependent ATPases; plays a role in antagonizing silencing during mating-type switching; relocalizes from nucleus to cytoplasm upon DNA replication stress				15	52	13	33	15.7215	46.3215		31.0215	1.8535	1.55894
CAGL0H10340g		1779	53390	ChrH	1007564	1009342	W	CAGL-IPF9|CAGL-CDS1550.1|CAG60180.1		CAL0130410	YDL109C	YGL144C	YDL109C	Anc_2.330	YDL109C		Putative lipase; involved in lipid metabolism; not an essential gene; YDL109C has a paralog, ROG1, that arose from the whole genome duplication	dup			479	725	456	493	493.808	652.151		572.98	1.85244	0.401257
CAGL0A00957g	PEX23B	1212	21572	ChrA	98272	99483	W	CAGL-IPF3359|CAGL-CDS2747.1|CAG57703.1		CAL0126761	PEX30	YLR324W	YLR324W	Anc_4.140	YLR324W	PEX30	Peroxisomal integral membrane protein; involved in negative regulation of peroxisome number; partially functionally redundant with Pex31p; genetic interactions suggest action at a step downstream of steps mediated by Pex28p and Pex29p; PEX30 has a paralog, PEX31, that arose from the whole genome duplication	dup			1477	1571	1200	1610	1406.1	1729.16		1567.63	1.85004	0.298368
CAGL0I09504g		1587	117602	ChrI	909589	911175	W	CAGL-IPF7739|CAGL-CDS1920.1|CAG60597.1		CAL0130298	CHK1	YBR274W	YBR274W	Anc_1.336	YBR274W	CHK1	Serine/threonine kinase and DNA damage checkpoint effector; mediates cell cycle arrest via phosphorylation of Pds1p; phosphorylated by checkpoint signal transducer Mec1p; homolog of S. pombe and mammalian Chk1 checkpoint kinase				433	641	415	470	448.033	596.685		522.359	1.84797	0.413366
CAGL0G06776g		549	587197	ChrG	647706	648254	W	CAGL-IPF3403|CAGL-CDS4584.1|CAG59582.1		CAL0129488	MRPL32	YCR003W	YCR003W	Anc_1.420	YCR003W	MRPL32	Mitochondrial ribosomal protein of the large subunit; protein abundance increases in response to DNA replication stress				205	246	155	267	189.602	280.329		234.966	1.84641	0.56414
CAGL0L01331g	ANP1	1344	-835354	ChrL	152499	151156	C	CAGL-IPF7407|CAGL-CDS2425.1|CAG61801.1		CAL0135180	ANP1	YEL036C	YEL036C	Anc_1.479	YEL036C	ANP1	Subunit of the alpha-1,6 mannosyltransferase complex; type II membrane protein; has a role in retention of glycosyltransferases in the Golgi; involved in osmotic sensitivity and resistance to aminonitrophenyl propanediol				55	98	43	88	52.3865	101.524		76.9553	1.84622	0.954554		0
CAGL0J11682g		480	921588	ChrJ	1138725	1139204	W	CAGL-IPF2927|CAGL-CDS4746.1|CAG61172.1		CAL0133472	MIX17	YMR002W	YMR002W	Anc_6.034	YMR002W	MIC17	Mitochondrial intermembrane space protein; required for normal oxygen consumption; contains twin cysteine-x9-cysteine motifs; protein abundance increases in response to DNA replication stress				143	178	117	212	137.493	214.126		175.81	1.84145	0.639097
CAGL0H04543g		549	-524327	ChrH	431010	430462	C	CAGL-IPF1843|CAGL-CDS4582.1|CAG59925.1		CAL0130326	SCS22	YER120W	YBL091C-A	Anc_7.423	YBL091C-A	SCS22	Protein involved in regulation of phospholipid metabolism; one of 6 proteins (Ist2p, Scs2p, Scs22p, Tcb1p, Tcb2p, Tcb3p) that connect ER to the plasma membrane (PM) and regulate PM phosphatidylinositol-4-phosphate (PI4P) levels by controlling access of Sac1p phosphatase to its substrate PI4P in the PM; similar to D. melanogaster inturned protein; SCS22 has a paralog, SCS2, that arose from the who…	dup			835	1123	766	862	844.013	1067.2		955.607	1.83827	0.338495
CAGL0C04455g	ATP16	465	7644	ChrC	430028	429564	C	CAGL-IPF888|CAGL-CDS4794.1|CAG58275.1		CAL0127374		YDL004W	YDL004W	Anc_3.213	YDL004W	ATP16	Delta subunit of the central stalk of mitochondrial F1F0 ATP synthase; F1F0 ATP synthase is a large, evolutionarily conserved enzyme complex required for ATP synthesis; F1 translationally regulates ATP6 and ATP8 expression to achieve a balanced output of ATP synthase genes encoded in nucleus and mitochondria; phosphorylated				142	161	98	202	126.439	199.771		163.105	1.83768	0.659906
CAGL0H09680g		4047	-9100	ChrH	943940	947986	W	CAGL-IPF57|CAGL-CDS0163.1|CAG60152.1		CAL0131744	SEC3	YER008C	YER008C	Anc_7.154	YER008C	SEC3	Subunit of the exocyst complex; the exocyst mediates polarized targeting and tethering of post-Golgi secretory vesicles to sites of exocytosis prior to SNARE-mediated fusion; PtdIns[4,5]P2-binding protein that localizes to exocytic sites in a Rho1p-dependent, actin-independent manner, targeting and anchoring the exocyst to the plasma membrane with Exo70p; direct GTP Rho1p effector; required for E…				1484	1845	1184	1361	1400.71	1720.37		1560.54	1.83676	0.296555
CAGL0A03146g		348	245898	ChrA	323377	323030	C	CAGL-IPF14977|CAG57797.1		CAL0126581	YDR381C-A	YDR381C-A	YDR381C-A	Anc_5.459	YDR381C-A		Protein of unknown function; localized to the mitochondrial outer membrane				662	855	607	735	669.188	858.842		764.015	1.82673	0.359981
CAGL0I05390g		1365	-283421	ChrI	510041	508677	C	CAGL-IPF1344|CAGL-CDS2351.1|CAG60420.1		CAL0132188	SKS1		YPL026C	Anc_8.477	YPL026C	SKS1	Putative serine/threonine protein kinase; involved in the adaptation to low concentrations of glucose independent of the SNF3 regulated pathway; SKS1 has a paralog, VHS1, that arose from the whole genome duplication	dup			355	602	375	374	386.812	520.977		453.895	1.82602	0.429585
CAGL0B03267g		441	-132883	ChrB	318516	318076	C	CAGL-IPF14771|CAG58013.1		CAL0127088	MRPL27	YBR282W	YBR282W	Anc_1.304	YBR282W	MRPL27	Mitochondrial ribosomal protein of the large subunit; homolog of human Bcl-2 interacting protein BMRP				44	58	42	106	46.331	92.063		69.197	1.81418	0.990644
CAGL0I04125g		585	-429023	ChrI	364049	363465	C	CAR58029.1		CAL0129573	OST5	YGL226C-A	YGL226C-A	Anc_3.543	YGL226C-A	OST5	Zeta subunit of the oligosaccharyltransferase complex of the ER lumen; complex catalyzes asparagine-linked glycosylation of newly synthesized proteins				32	104	56	71	48.108	94.5705		71.3393	1.81407	0.975113
CAGL0G06050g		225	520635	ChrG	581306	581530	W	CAGL-IPF15337|CAG59552.1		CAL0130103							#N/A				160	285	89	103	130.44	203.806		167.123	1.81291	0.643819
CAGL0M13783g		3591	306384	ChrM	1354198	1357788	W	CAGL-IPF6055|CAGL-CDS0245.1|CAG62923.1		CAL0136737	UBP15	YMR304W	YMR304W	Anc_5.018	YMR304W	UBP15	Ubiquitin-specific protease involved in protein deubiquitination; catalytic activity regulated by an N-terminal TRAF-like domain and and C-terminal sequences; physically interacts with anaphase-promoting complex/cyclosome (APC/C) activator, Cdh1p; forms a complex with AAA peroxins Pex1p and Pex6p				297	455	281	328	305.596	420.544		363.07	1.80008	0.460633
CAGL0L10780g		6702	168053	ChrL	1158585	1151884	C	CAGL-IPF4189|CAGL-CDS0020.1|CAG62210.1		CAL0135524	HFA1	YNR016C	YMR207C	Anc_6.311	YMR207C	HFA1	Mitochondrial acetyl-coenzyme A carboxylase; catalyzes production of malonyl-CoA in mitochondrial fatty acid biosynthesis; relocalizes from mitochondrion to cytoplasm upon DNA replication stress; HFA1 has a paralog, ACC1, that arose from the whole genome duplication				1752	2013	1705	2046	1824.13	2205.43		2014.78	1.79994	0.273855
CAGL0H09306g		288	-43773	ChrH	911146	911433	W	CAGL-IPF13223|CAG60136.1		CAL0131900	TIM13	YGR181W	YGR181W	Anc_5.188	YGR181W	TIM13	Mitochondrial intermembrane space protein; forms a complex with Tim8p that delivers a subset of hydrophobic proteins to the TIM22 complex for insertion into the inner membrane				242	345	217	290	242.543	343.295		292.919	1.79846	0.501205
CAGL0M12925g		741	227230	ChrM	1276469	1277209	W	CAGL-IPF6117|CAGL-CDS4041.1|CAG62885.1		CAL0136363		YHR044C	YHR044C	Anc_5.290	YHR044C	DOG1	2-deoxyglucose-6-phosphate phosphatase; member of a family of low molecular weight phosphatases; confers 2-deoxyglucose resistance when overexpressed, in vivo substrate has not yet been identified; DOG1 has a paralog, DOG2, that arose from a single-locus duplication				425	588	396	478	433.478	574.869		504.173	1.79805	0.407274
CAGL0M12749g		1359	208358	ChrM	1257288	1258646	W	CAGL-IPF8484|CAGL-CDS2381.1|CAG62877.1		CAL0136823	PCI8	YIL071C	YIL071C	Anc_7.267	YIL071C	PCI8	Possible shared subunit of Cop9 signalosome (CSN) and eIF3; binds eIF3b subunit Prt1p, has possible dual functions in transcriptional and translational control, contains a PCI (Proteasome-COP9 signalosome (CSN)-eIF3) domain				191	281	157	220	183.714	270.31		227.012	1.79684	0.557157
CAGL0H01353g		606	-821266	ChrH	133494	134099	W	CAGL-IPF5807|CAGL-CDS4442.1|CAG59790.1		CAL0130090	MHR1	YDR296W	YDR296W	Anc_5.313	YDR296W	MHR1	Protein involved in homologous recombination in mitochondria; required for recombination-dependent mtDNA partitioning; involved in stimulation of mitochondrial DNA replication in response to oxidative stress				1	42	24	37	14.832	43.6635		29.2477	1.79212	1.55771
CAGL0E00517g		444	-197360	ChrE	48402	48845	W	CAGL-IPF5584|CAGL-CDS4864.1|CAG58629.1		CAL0128900	YCR087C-A	YCR087C-A	YCR087C-A	Anc_6.365	YCR087C-A		Putative protein of unknown function; green fluorescent protein (GFP)-fusion protein localizes to the nucleolus; YCR087C-A is not an essential gene				1317	1717	857	928	1135.56	1402.84		1269.2	1.79207	0.304946
CAGL0C03245g		480	-98840	ChrC	323072	323551	W	CAGL-IPF985|CAGL-CDS4749.1|CAG58223.1		CAL0127398	ATG10	YLL042C	YLL042C	Anc_4.012	YLL042C	ATG10	Conserved E2-like conjugating enzyme; mediates formation of the Atg12p-Atg5p conjugate, which is a critical step in autophagy				2623	3112	2711	3065	2818.46	3351.56		3085.01	1.79021	0.249924
CAGL0D04444g		1725	-118162	ChrD	437288	435564	C	CAGL-IPF4673|CAGL-CDS1644.1|CAG58519.1		CAL0128049	RAD61	YDR014W	YDR014W	Anc_3.235	YDR014W	RAD61	Subunit of a complex that inhibits sister chromatid cohesion; also negatively regulates chromosome condensation; inhibited by Eco1p-acetylated cohesin subunits Smc3p and Mcd1p; binds Smc3p ATPase head of cohesin; related to the human Wapl protein that controls the association of cohesin with chromatin				127	211	97	138	118.383	187.299		152.841	1.78886	0.661875
CAGL0J11990g	AWP4	3849	972724	ChrJ	1188177	1192025	W	CAGL-IPF16343|CAGL0J12001g|CAGL-IPF8927|CAGL0J12023g|CAGL-IPF10264|CAGL0J12045g|CAGL-IPF13905|CAGL-IPF10262|CAGL0J12056g		CAL0133214							#N/A				494	742	481	512	515.196	671.776		593.486	1.78885	0.38286
CAGL0H08954g		846	-79536	ChrH	875949	875104	C	CAGL-IPF108|CAGL-CDS3745.1|CAG60121.1		CAL0130140	MRM2	YGL136C	YGL136C	Anc_6.238	YGL136C	MRM2	Mitochondrial 2' O-ribose methyltransferase; required for methylation of U(2791) in 21S rRNA; MRM2 deletion confers thermosensitive respiration and loss of mitochondrial DNA; has similarity to Spb1p and Trm7p, and to E. coli FtsJ/RrmJ				1151	1335	1001	1247	1132.56	1398.62		1265.59	1.78763	0.304421
CAGL0M03663g		1620	-637266	ChrM	411533	413152	W	CAGL-IPF6796|CAGL-CDS1847.1|CAG62481.1		CAL0136835	RIM21	YNL294C	YNL294C	Anc_3.063	YNL294C	RIM21	pH sensor molecule, component of the RIM101 pathway; has a role in cell wall construction and alkaline pH response; is glycosylated and phosphorylated; interacts with Dfg16p and Rim9p to form a pH-sensing complex; localization to the plasma membrane is dependent on Dfg16p and Rim9p; has similarity to A. nidulans PalH				133	245	105	125	125.828	196.688		161.257	1.78532	0.644458		0
CAGL0M13717g		1542	296662	ChrM	1347041	1345500	C	CAGL-IPF6060|CAGL-CDS1994.1|CAG62920.1		CAL0137215	ADE4	YMR300C	YMR300C	Anc_5.021	YMR300C	ADE4	Phosphoribosylpyrophosphate amidotransferase (PRPPAT); catalyzes first step of the 'de novo' purine nucleotide biosynthetic pathway; also known as amidophosphoribosyltransferase				952	1348	854	873	951.397	1186.14		1068.77	1.78413	0.318157
CAGL0K01925g	GDI1	1347	-86150	ChrK	170897	172243	W	CAGL-IPF8715|CAGL-CDS2419.1|CAG61270.1		CAL0133969	GDI1	YER136W	YER136W	Anc_8.175	YER136W	GDI1	GDP dissociation inhibitor; regulates vesicle traffic in secretory pathways by regulating the dissociation of GDP from the Sec4/Ypt/rab family of GTP binding proteins				0	22	3	11	2.6665	18.4405		10.5535	1.78224	2.78986
CAGL0F03245g	IRE1	3111	92234	ChrF	320034	316924	C	CAGL-IPF1779|CAGL-CDS0392.1|CAG59035.1		CAL0131040	IRE1	YHR079C	YHR079C	Anc_5.368	YHR079C	IRE1	Serine-threonine kinase and endoribonuclease; transmembrane protein that mediates the unfolded protein response (UPR) by regulating Hac1p synthesis through HAC1 mRNA splicing; Kar2p binds inactive Ire1p and releases from it upon ER stress				808	1005	700	849	793.85	1000.59		897.22	1.77995	0.333912		0
CAGL0J09592g		921	727193	ChrJ	945030	944110	C	CAGL-IPF6939|CAGL-CDS3557.1|CAG61077.1		CAL0133552	CWC2	YDL209C	YDL209C	Anc_8.466	YDL209C	CWC2	Member of the NineTeen Complex (NTC); this complex contains Prp19p and stabilizes U6 snRNA in catalytic forms of the spliceosome containing U2, U5, and U6 snRNAs; binds directly to U6 snRNA; similar to S. pombe Cwf2				140	266	129	143	142.659	217.726		180.193	1.77705	0.609941
CAGL0L04642g		1869	-451461	ChrL	536655	534787	C	CAGL-IPF8143|CAGL-CDS1394.1|CAG61947.1		CAL0135358	ALE1	YOR175C	YOR175C	Anc_6.066	YOR175C	ALE1	Broad-specificity lysophospholipid acyltransferase; part of MBOAT family of membrane-bound O-acyltransferases; key component of Lands cycle; may have role in fatty acid exchange at sn-2 position of mature glycerophospholipids				273	420	235	277	268.043	373.183		320.613	1.77667	0.477423
CAGL0M00924g		3912	-944918	ChrM	102735	106646	W	CAGL-IPF5460|CAGL-CDS0191.1|CAG62362.1		CAL0137083	ECM30	YLR436C	YLR436C	Anc_4.315	YLR436C	ECM30	Putative protein of unknown function; may play a role in cell wall biosynthesis, mutants have abormal relative levels of mannose and glucose and have Gap1p sorting and transport defects; (GFP)-fusion protein localizes to the cytoplasm				168	283	191	232	191.101	278.336		234.718	1.77477	0.542496
CAGL0L04466g		2352	-466714	ChrL	519292	521643	W	CAGL-IPF8128|CAGL-CDS0852.1|CAG61939.1		CAL0135064	SEY1	YOR165W	YOR165W	Anc_6.056	YOR165W	SEY1	Dynamin-like GTPase that mediates homotypic ER fusion; has a role in ER morphology; interacts physically and genetically with Yop1p and Rtn1p; functional ortholog of the human atlastin ATL1, defects in which cause a form of the human disease hereditary spastic paraplegia; homolog of Arabidopsis RHD3				353	440	263	375	323.596	440.562		382.079	1.77408	0.445151
CAGL0K11022g		756	818753	ChrK	1076850	1076095	C	CAGL-IPF3265|CAGL-CDS3988.1|CAG61658.1		CAL0134889	FMN1	YDR236C	YDR236C	Anc_8.459	YDR236C	FMN1	Riboflavin kinase, produces riboflavin monophosphate (FMN); FMN is a necessary cofactor for many enzymes; predominantly localizes to the microsomal fraction and also found in the mitochondrial inner membrane				135	170	119	207	134.605	207.199		170.901	1.77018	0.622287
CAGL0J04356g		1518	194944	ChrJ	413079	411562	C	CAGL-IPF7060|CAGL-CDS2048.1|CAG60844.1		CAL0133316	APN2	YBL019W	YBL019W	Anc_8.165	YBL019W	APN2	Class II abasic (AP) endonuclease involved in repair of DNA damage; homolog of human HAP1 and E. coli exoIII				168	268	140	184	162.77	242.732		202.751	1.77014	0.576529		0
CAGL0J07370g		1872	497046	ChrJ	713487	715358	W	CAGL-IPF2375|CAGL-CDS1378.1|CAG60978.1		CAL0129917	JJJ1	YNL227C	YNL227C	Anc_2.015	YNL227C	JJJ1	Co-chaperone that stimulates the ATPase activity of Ssa1p; required for a late step of ribosome biogenesis; associated with the cytosolic large ribosomal subunit; contains a J-domain; mutation causes defects in fluid-phase endocytosis				57	89	33	81	47.8315	92.9255		70.3785	1.77002	0.958114		0
CAGL0J04268g		1581	183116	ChrJ	401283	399703	C	CAGL-IPF7068|CAGL-CDS1925.1|CAG60840.1		CAL0133538	ACH1	YBL015W	YBL015W	Anc_8.161	YBL015W	ACH1	Protein with CoA transferase activity; particularly for CoASH transfer from succinyl-CoA to acetate; has minor acetyl-CoA-hydrolase activity; phosphorylated; required for acetate utilization and for diploid pseudohyphal growth				1306	1483	1193	1482	1316.71	1610.21		1463.46	1.76974	0.29031
CAGL0F04257g		1050	196958	ChrF	423727	422678	C	CAGL-IPF1695|CAGL-CDS3159.1|CAG59080.1		CAL0131408	HEK2		YBL032W	Anc_3.318	YBL032W	HEK2	RNA binding protein involved in asymmetric localization of ASH1 mRNA; represses translation of ASH1 mRNA, an effect reversed by Yck1p-dependent phosphoryation; regulates telomere position effect and length; similarity to hnRNP-K	dup			76	179	99	110	93.9945	154.905		124.45	1.76841	0.720735
CAGL0D05060g		1533	-67757	ChrD	487597	486065	C	CAGL-IPF4948|CAGL-CDS2010.1|CAG58541.1		CAL0128199		YGR123C	YGR123C	Anc_3.481	YGR123C	PPT1	Protein serine/threonine phosphatase; regulates Hsp90 chaperone by affecting its ATPase and cochaperone binding activities; has similarity to human phosphatase PP5; present in both the nucleus and cytoplasm; expressed during logarithmic growth				618	877	545	591	612.747	785.531		699.139	1.76786	0.358375
CAGL0H09526g		3408	-22083	ChrH	934683	931276	C	CAGL-IPF68|CAGL-CDS0287.1|CAG60146.1		CAL0130170	PRP22	YER013W	YER013W	Anc_7.163	YER013W	PRP22	DEAH-box RNA-dependent ATPase/ATP-dependent RNA helicase; associates with lariat intermediates before the second catalytic step of splicing; mediates ATP-dependent mRNA release from the spliceosome and unwinds RNA duplexes; required for proofreading the exon ligation reaction				139	229	101	139	126.606	196.885		161.745	1.76713	0.637009
CAGL0J11528g		1674	903429	ChrJ	1121642	1119969	C	CAGL-IPF2915|CAGL-CDS1727.1|CAG61165.1		CAL0133142	YNL193W	YNL193W	YNL193W	Anc_2.057	YNL193W		Putative protein of unknown function; exhibits a two-hybrid interaction with Yhr151cp in a large-scale analysis				355	441	282	397	335.151	453.943		394.547	1.76586	0.437702
CAGL0M12364g		237	186573	ChrM	1236300	1236064	C	CAGL-IPF11445|CAGL-CDS5731.1|CAG62860.1		CAL0137179							#N/A				2709	3324	2553	2782	2773.69	3291.86		3032.78	1.76439	0.247096
CAGL0J12034g		1226	974036	ChrJ	1190800	1192025	W	CAGL0J11990g.2		CAL0000206979							#N/A				494	738	478	508	513.529	667.434		590.481	1.76393	0.378179
CAGL0I02332g		1632	-584672	ChrI	207292	208923	W	CAGL-IPF8084|CAGL-CDS1819.1|CAG60290.1		CAL0130280	MTG2	YHR168W	YHR168W	Anc_5.070	YHR168W	MTG2	Putative GTPase; member of the Obg family; peripheral protein of the mitochondrial inner membrane that associates with the large ribosomal subunit; required for mitochondrial translation, possibly via a role in ribosome assembly				5	17	4	28	5.722	25.894		15.808	1.76352	2.17803
CAGL0M05995g		948	-419682	ChrM	629453	630400	W	CAGL-IPF9085|CAGL-CDS3466.1|CAG62583.1		CAL0136743	PET10	YKR046C	YKR046C	Anc_1.236	YKR046C	PET10	Protein of unknown function that co-purifies with lipid particles; expression pattern suggests a role in respiratory growth; computational analysis of large-scale protein-protein interaction data suggests a role in ATP/ADP exchange				145	247	137	173	149.603	225.791		187.697	1.76206	0.593847
CAGL0F06633g		1290	427673	ChrF	654562	653273	C	CAGL-IPF467|CAGL-CDS2572.1|CAG59180.1		CAL0130964	UBX4	YMR067C	YMR067C	Anc_2.638	YMR067C	UBX4	UBX domain-containing protein that interacts with Cdc48p; involved in degradation of polyubiquitinated proteins via the ERAD (ER-associated degradation) pathway; modulates the Cdc48p-Nplp-Ufd1p AAA ATPase complex during its role in delivery of misfolded proteins to the proteasome; protein abundance increases in response to DNA replication stress				305	496	317	338	329.594	446.899		388.246	1.76134	0.439261
CAGL0D02046g		315	-343826	ChrD	210605	210919	W	CAGL-IPF15447|CAG58414.1		CAL0128183	CMC1	YKL137W	YKL137W	Anc_2.429	YKL137W	CMC1	Copper-binding protein of the mitochondrial intermembrane space; evolutionarily conserved; may be involved in delivering copper from the matrix to the cytochrome c oxidase complex; contains a twin CX9C motif				527	761	438	476	507.809	660.198		584.004	1.75933	0.378613
CAGL0J05940g		1578	345982	ChrJ	562570	564147	W	CAGL-IPF2277|CAGL-CDS2145.1|CAG60915.1		CAL0133502	YCK2	YNL154C	YNL154C	Anc_2.105	YNL154C	YCK2	Palmitoylated plasma membrane-bound casein kinase I isoform; shares redundant functions with Yck1p in morphogenesis, proper septin assembly, endocytic trafficking, and glucose sensing; stabilized by Sod1p binding in the presence of glucose and oxygen, causing glucose repression of respiratory metabolism; YCK2 has a paralog, YCK1, that arose from the whole genome duplication	dup			458	633	407	480	456.089	598.54		527.314	1.75888	0.392134
CAGL0A01892g		267	117387	ChrA	194560	194826	W	CAGL-IPF2998|CAGL-CDS5671.1|CAG57741.1		CAL0126573							#N/A				770	1121	658	660	751.519	947.93		849.725	1.7566	0.334971		0
CAGL0G01738g		933	96736	ChrG	157053	157985	W	CAGL-IPF3835|CAGL-CDS3513.1|CAG59363.1		CAL0137535		YGR086C	YGR086C	Anc_3.420	YGR086C	PIL1	Primary protein component of eisosomes; eisosomes are large immobile cell cortex structures associated with endocytosis; null mutant shows activation of Pkc1p/Ypk1p stress resistance pathways; detected in phosphorylated state in mitochondria; member of the BAR domain family; protein increases in abundance and relocalizes from plasma membrane to cytoplasm upon DNA replication stress	dup			72	110	76	135	79.218	135.043		107.13	1.75609	0.769513
CAGL0M03795g		1542	-620231	ChrM	430148	428607	C	CAGL-IPF6785|CAGL-CDS1995.1|CAG62487.1		CAL0137297			YOL123W	Anc_3.049	YOL123W	HRP1	Subunit of cleavage factor I; cleavage factor I is a five-subunit complex required for the cleavage and polyadenylation of pre-mRNA 3' ends; RRM-containing heteronuclear RNA binding protein and hnRNPA/B family member that binds to poly (A) signal sequences	dup			29	84	43	64	39.3865	80.472		59.9293	1.75136	1.03079
CAGL0L08822g		3096	-24094	ChrL	964635	961540	C	CAGL-IPF7501|CAGL-CDS0400.1|CAG62129.1		CAL0135210	RQC2	YPL009C	YPL009C	Anc_8.075	YPL009C	TAE2	Component of the ribosome quality control complex (RQC); RQC (Rqc1p-Rkr1p-Tae2p-Cdc48p-Npl4p-Ufd1p) is a ribosome-bound complex required for the degradation of polypeptides arising from stalled translation involved in protein translation; monitors translation stress and signals this to Hsf1p; may interact with ribosomes, based on co-purification experiments; green fluorescent protein (GFP)-fusion…				1192	1637	1033	1055	1170.83	1437.2		1304.02	1.75032	0.29573
CAGL0I00396g		348	-763361	ChrI	29592	29245	C	CAGL-IPF2001|CAGL-CDS5243.1|CAG60207.1		CAL0132324							#N/A				52	117	69	97	65.3295	116.293		90.8115	1.74958	0.831964
CAGL0H08503g		2178	-121332	ChrH	834819	832642	C	CAGL-IPF148|CAGL-CDS1004.1|CAG60102.1		CAL0131782		YBR094W	YBR094W	Anc_3.335	YBR094W	PBY1	Putative tubulin tyrosine ligase associated with P-bodies; forms cytoplasmic foci upon DNA replication stress				1444	1683	1306	1564	1448.48	1758.22		1603.35	1.74302	0.279574
CAGL0I02112g		1470	-610641	ChrI	181404	182873	W	CAGL-IPF2120|CAGL-CDS2125.1|CAG60280.1		CAL0132072	TDA11	YHR159W	YHR159W	Anc_5.087	YHR159W	TDA11	Putative protein of unknown function; green fluorescent protein (GFP)-fusion protein localizes to the cytoplasm; potential Cdc28p substrate; null mutant is sensitive to expression of the top1-T722A allele				626	825	530	622	608.415	777.681		693.048	1.74194	0.354123
CAGL0M06413g		2667	-383425	ChrM	664851	667517	W	CAGL-IPF6154|CAGL-CDS0621.1|CAG62602.1		CAL0137439		YPL084W	YPL084W	Anc_8.560	YPL084W	BRO1	Cytoplasmic class E vacuolar protein sorting (VPS) factor; coordinates deubiquitination in the multivesicular body (MVB) pathway by recruiting Doa4p to endosomes				1023	1589	1498	1437	1344.64	1636.86		1490.75	1.73753	0.283715
CAGL0F03157g		2973	83095	ChrF	310826	307854	C	CAGL-IPF1784|CAGL-CDS0457.1|CAG59031.1		CAL0129172	CYM1	YDR430C	YDR430C	Anc_5.541	YDR430C	CYM1	Lysine-specific metalloprotease of the pitrilysin family; metalloprotease of the intermembrane space; degrades proteins and presequence peptides cleaved from imported proteins; required for normal mitochondrial morphology				2741	3623	2638	2636	2836.91	3355.88		3096.39	1.73728	0.24237
CAGL0K07392g		1344	474030	ChrK	731078	732421	W	CAGL-IPF5368|CAGL-CDS2421.1|CAG61505.1		CAL0134217	ZRC1	YOR316C	YMR243C	Anc_8.792	YMR243C	ZRC1	Vacuolar membrane zinc transporter; transports zinc from cytosol to vacuole for storage; also has role in resistance to zinc shock resulting from sudden influx of zinc into cytoplasm; human ortholog SLC30A10 functions as a Mn transporter and mutations in SLC30A10 cause neurotoxic accumulation of Mn in liver and brain; ZRC1 has a paralog, COT1, that arose from the whole genome duplication				49	97	30	59	42.165	84.0445		63.1047	1.73711	0.995107
CAGL0D05192g		372	-57971	ChrD	496431	496802	W	CAGL-IPF4940|CAGL-CDS5139.1|CAG58546.1		CAL0128153	QCR6	YFR033C	YFR033C	Anc_7.190	YFR033C	QCR6	Subunit 6 of the ubiquinol cytochrome-c reductase complex; the complex, also known as the cytochrome bc(1) complex or Complex III, is a component of the mitochondrial inner membrane electron transport chain; highly acidic protein; required for maturation of cytochrome c1; may be loosely associated with the complex since it is easily released into the intermembrane space				668	924	503	548	614.417	783.854		699.135	1.73329	0.351368
CAGL0J08349g		3012	613351	ChrJ	832233	829222	C	CAGL-IPF6716|CAGL-CDS0444.1|CAG61023.1		CAL0133204	CAF120	YNL278W	YNL278W	Anc_1.066	YNL278W	CAF120	Part of the CCR4-NOT transcriptional regulatory complex; involved in controlling mRNA initiation, elongation, and degradation; CAF120 has a paralog, SKG3, that arose from the whole genome duplication				376	459	333	457	373.981	498.074		436.028	1.73142	0.413392
CAGL0K04807g		2391	210593	ChrK	469508	467118	C	CAGL-IPF4017|CAGL-CDS0818.1|CAG61396.1		CAL0134377	VID27	YNL212W	YNL212W	Anc_2.035	YNL212W	VID27	Cytoplasmic protein of unknown function; possibly involved in vacuolar protein degradation; not essential for proteasome-dependent degradation of fructose-1,6-bisphosphatase (FBPase); null mutants exhibit normal growth				111	171	104	159	114.272	179.594		146.933	1.73094	0.652271
CAGL0H08866g		1977	-89758	ChrH	866293	864317	C	CAGL-IPF118|CAGL-CDS1239.1|CAG60117.1		CAL0131714	HOT1	YMR172W	YMR172W	Anc_6.243	YMR172W	HOT1	Transcription factor for glycerol biosynthetic genes; required for the transient induction of glycerol biosynthetic genes GPD1 and GPP2 in response to high osmolarity; targets Hog1p to osmostress responsive promoters; has similarity to Msn1p and Gcr1p				826	993	633	792	765.631	961.216		863.424	1.7295	0.32821		0
CAGL0J11594g		2814	910926	ChrJ	1129709	1126896	C	CAGL-IPF2921|CAGL-CDS0539.1|CAG61168.1		CAL0132882		YOL004W	YOL004W	Anc_6.029	YOL004W	SIN3	Component of both the Rpd3S and Rpd3L histone deacetylase complexes; involved in transcriptional repression and activation of diverse processes, including mating-type switching and meiosis; involved in the maintenance of chromosomal integrity	dup			53	126	34	44	46.387	89.762		68.0745	1.72941	0.952384
CAGL0M12617g		978	200674	ChrM	1249794	1250771	W	CAGL-IPF8474|CAGL-CDS3368.1|CAG62871.1		CAL0137131	YRB2	YIL063C	YIL063C	Anc_7.253	YIL063C	YRB2	Protein of unknown function; involved in nuclear processes of the Ran-GTPase cycle; involved in nuclear protein export; contains Ran Binding Domain and FxFG repeats; interacts with Srm1p, GTP-Gsp1p, Rna1p and Crm1p; relocalizes to the cytosol in response to hypoxia; not essential for viability				6	38	7	17	7.8885	29.9535		18.921	1.7293	1.9249
CAGL0L02585g		2322	-682496	ChrL	305846	303525	C	CAGL-IPF2782|CAGL-CDS0878.1|CAG61853.1		CAL0135732		YKR099W	YKR099W	Anc_5.713	YKR099W	BAS1	Myb-related transcription factor; involved in regulating basal and induced expression of genes of the purine and histidine biosynthesis pathways; also involved in regulation of meiotic recombination at specific genes				213	305	172	234	203.046	290.507		246.776	1.72696	0.516766		0
CAGL0E03003g		618	38368	ChrE	284043	284660	W	CAGL-IPF9195|CAGL-CDS4410.1|CAG58739.1		CAL0128892	NAT2	YGR147C	YGR147C	Anc_4.082	YGR147C	NAT2	Protein of unknown function; has an apparent role in acetylation of N-terminal methionine residues				167	213	128	212	155.604	231.626		193.615	1.72661	0.573918
CAGL0I09460g		1446	114134	ChrI	907636	906191	C	CAGL-IPF7743|CAGL-CDS2188.1|CAG60595.1		CAL0132546	HSM3	YBR272C	YBR272C	Anc_1.333	YBR272C	HSM3	Proteasome-interacting protein; involved in the assembly of the base subcomplex of the 19S proteasomal regulatory particle (RP); involved in DNA mismatch repair during slow growth; weak similarity to Msh1p; related to human 19S subunit S5b; structural study suggests Hsm3p is a scaffold protein for Rpt1p-Rpt2p complex formation				408	626	362	379	406.091	535.904		470.998	1.72406	0.400173
CAGL0J08679g		1020	642324	ChrJ	859191	860210	W	CAGL-IPF6688|CAG61036.1		CAL0133124	TMA46	YOR091W	YOR091W	Anc_2.194	YOR091W	TMA46	Protein of unknown function that associates with translating ribosomes; interacts with GTPase Rbg1p				188	304	177	214	193.323	278.297		235.81	1.72293	0.525608
CAGL0I09812g		846	144838	ChrI	938040	937195	C	CAGL-IPF7715|CAGL-CDS3748.1|CAG60611.1		CAL0132596	DGK1	YOR311C	YOR311C	Anc_8.788	YOR311C	DGK1	Diacylglycerol kinase; localized to the endoplasmic reticulum (ER); overproduction induces enlargement of ER-like membrane structures and suppresses a temperature-sensitive sly1 mutation; contains a CTP transferase domain				23	71	29	47	28.6095	64.0185		46.314	1.72118	1.16199
CAGL0B04301g		1629	-29821	ChrB	420544	422172	W	CAGL-IPF698|CAGL-CDS1826.1|CAG58057.1		CAL0127920		YBR028C	YBR028C	Anc_3.229	YBR028C	YPK3	AGC kinase; phosphorylated by cAMP-dependent protein kinase (PKA) in a TORC1-dependent manner				489	619	464	581	503.252	650.676		576.964	1.71524	0.370657
CAGL0A00209g		2181	-53956	ChrA	22260	24440	W	CAGL-IPF3308|CAGL-CDS1000.1|CAG57672.1		CAL0126795	STT3	YGL022W	YGL022W	Anc_4.098	YGL022W	STT3	Subunit of the oligosaccharyltransferase complex of the ER lumen; complex catalyzes asparagine-linked glycosylation of newly synthesized proteins; forms a subcomplex with Ost3p and Ost4p and is directly involved in catalysis				52	57	37	105	47.5535	90.9775		69.2655	1.71491	0.935958
CAGL0K04147g		648	125733	ChrK	383129	383776	W	CAGL-IPF2137|CAGL-CDS4298.1|CAG61366.1		CAL0133973	ORM1		YGR038W	Anc_4.182	YGR038W	ORM1	Protein of unknown function; evolutionarily conserved, required for resistance to agents that induce unfolded protein response; Orm1p and Orm2p together control membrane biogenesis by coordinating lipid homeostasis with protein quality control; ORM1 has a paralog, ORM2, that arose from the whole genome duplication	dup			343	527	364	398	374.702	497.529		436.115	1.71331	0.409037
CAGL0G06842g		3120	591810	ChrG	654152	651033	C	CAGL-IPF3399|CAG59585.1		CAL0137783	BBC1	YJL020C	YJL020C	Anc_5.170	YJL020C	BBC1	Protein possibly involved in assembly of actin patches; interacts with an actin assembly factor Las17p and with the SH3 domains of Type I myosins Myo3p and Myo5p; localized predominantly to cortical actin patches				305	484	315	340	328.482	442.07		385.276	1.713	0.428458
CAGL0H08393g		1839	-132146	ChrH	821998	823836	W	CAGL-IPF155|CAGL-CDS1437.1|CAG60097.1		CAL0131700	BAP2		YDR046C	Anc_3.284	YDR046C	BAP3	Amino acid permease; involved in uptake of cysteine, leucine, isoleucine and valine; BAP3 has a paralog, BAP2, that arose from the whole genome duplication	dup			2688	3236	2620	2878	2800.41	3304.07		3052.24	1.70578	0.238606
CAGL0A03051g		607	235725	ChrA	313334	312728	C	CAGL-IPF40202|CAR57997.1		CAL0126747	LSM6	YDR378C	YDR378C	Anc_5.452	YDR378C	LSM6	Lsm (Like Sm) protein; part of heteroheptameric complexes (Lsm2p-7p and either Lsm1p or 8p): cytoplasmic Lsm1p complex involved in mRNA decay; nuclear Lsm8p complex part of U6 snRNP and possibly involved in processing tRNA, snoRNA, and rRNA				303	505	325	330	333.038	446.715		389.876	1.70154	0.42367
CAGL0B03289g		2613	-130861	ChrB	319012	321624	W	CAGL-IPF790|CAGL-CDS0648.1|CAG58014.1		CAL0127886	DUG2	YBR281C	YBR281C	Anc_1.306	YBR281C	DUG2	Component of glutamine amidotransferase (GATase II); forms a complex with Dug3p to degrade glutathione (GSH) and other peptides containing a gamma-glu-X bond in an alternative pathway to GSH degradation by gamma-glutamyl transpeptidase (Ecm38p)				362	528	342	390	371.981	493.345		432.663	1.70131	0.407368
CAGL0E02871g		1116	26296	ChrE	272837	271722	C	CAGL-IPF9204|CAGL-CDS2981.1|CAG58733.1		CAL0128974	FMT1	YBL013W	YBL013W	Anc_4.095	YBL013W	FMT1	Methionyl-tRNA formyltransferase; catalyzes the formylation of initiator Met-tRNA in mitochondria; potential Cdc28p substrate				1668	2070	1560	1717	1701.58	2041.3		1871.44	1.69776	0.262616
CAGL0J10736g		1161	831335	ChrJ	1048132	1049292	W	CAGL-IPF2851|CAGL-CDS2857.1|CAG61129.1		CAL0133726	PPE1	YHR075C	YHR075C	Anc_5.358	YHR075C	PPE1	Protein with carboxyl methyl esterase activity; may have a role in demethylation of the phosphoprotein phosphatase catalytic subunit; also identified as a small subunit mitochondrial ribosomal protein				226	223	131	267	186.77	268.829		227.8	1.69701	0.525419
CAGL0K03839g		915	101889	ChrK	359152	360066	W	CAGL-IPF2155|CAGL-CDS3570.1|CAG61353.1		CAL0134603	YMR130W	YMR130W	YMR130W	Anc_2.404	YMR130W		Putative protein of unknown function; YMR130W is not an essential gene				560	771	508	569	563.194	719.649		641.422	1.69607	0.353662
CAGL0B02277g		693	-234780	ChrB	216745	216053	C	CAGL-IPF5201|CAGL-CDS4166.1|CAG57969.1		CAL0126994	DAT1	YML113W	YML113W	Anc_8.836	YML113W	DAT1	DNA binding protein that recognizes oligo(dA).oligo(dT) tracts; Arg side chain in its N-terminal pentad Gly-Arg-Lys-Pro-Gly repeat is required for DNA-binding; relocalizes to the cytosol in response to hypoxia; not essential for viability				51	129	63	75	61.4965	109.412		85.4545	1.69542	0.831201
CAGL0D04400g		273	-122326	ChrD	432398	432126	C	CAGL-IPF4676|CAGL-CDS5655.1|CAG58517.1		CAL0128379	HED1	YDR014W-A	YDR014W-A	Anc_3.238	YDR014W-A	HED1	Meiosis-specific protein; down-regulates Rad51p-mediated mitotic recombination when the meiotic recombination machinery is impaired; early meiotic gene, transcribed specifically during meiotic prophase				148	214	101	156	131.106	199.338		165.222	1.6933	0.604489
CAGL0E03762g		1755	106133	ChrE	352994	351240	C	CAGL-IPF2459|CAGL-CDS1586.1|CAG58769.1		CAL0128756	RIM101	YHL027W	YHL027W	Anc_4.021	YHL027W	RIM101	Cys2His2 zinc-finger transcriptional repressor; involved in alkaline responsive gene repression as part of adaptation to a alkaline conditions; involved in cell wall assembly; required for alkaline pH-stimulated haploid invasive growth and sporulation; activated by alkaline-dependent proteolytic processing which results in removal of the C-terminal tail; similar to A. nidulans PacC				1112	1559	1031	1024	1129.72	1380.05		1254.89	1.69184	0.288757		0
CAGL0H04103g		2004	-565604	ChrH	388457	390460	W	CAGL-IPF1872|CAGL-CDS1184.1|CAG59906.1		CAL0131560	UFO1	YML088W	YML088W	Anc_8.863	YML088W	UFO1	F-box receptor protein; subunit of the Skp1-Cdc53-F-box receptor (SCF) E3 ubiquitin ligase complex; binds to phosphorylated Ho endonuclease, allowing its ubiquitylation by SCF and subsequent degradation				185	344	209	211	209.599	296.541		253.07	1.69077	0.500594
CAGL0A01672g		2085	88572	ChrA	166920	164836	C	CAGL-IPF3018|CAGL-CDS1114.1|CAG57731.1		CAL0126627		YGR009C	YGR009C	Anc_4.078	YGR009C	SEC9	t-SNARE protein required for secretory vesicle-plasma membrane fusion; similar to but not functionally redundant with Spo20p; interacts non-exocyst bound Sec6p; SNAP-25 homolog				34	112	48	50	44.664	86.275		65.4695	1.69018	0.94983
CAGL0D01012g		2409	-434506	ChrD	118878	121286	W	CAGL-IPF2625|CAGL-CDS0805.1|CAG58369.1		CAL0128471	MBP1	YDL056W	YDL056W	Anc_4.232	YDL056W	MBP1	Transcription factor; involved in regulation of cell cycle progression from G1 to S phase, forms a complex with Swi6p that binds to MluI cell cycle box regulatory element in promoters of DNA synthesis genes				15	49	22	44	20.721	51.262		35.9915	1.68707	1.3068		0
CAGL0M08778g	SWM1	411	-176172	ChrM	873232	873642	W	CAGL-IPF8156|CAGL-CDS4975.1|CAG62703.1		CAL0136617	SWM1	YDR260C	YDR260C	Anc_5.620	YDR260C	SWM1	Subunit of the anaphase-promoting complex (APC); APC is an E3 ubiquitin ligase that regulates the metaphase-anaphase transition and exit from mitosis; required for activation of the daughter-specific gene expression and spore wall maturation				461	563	399	523	453.144	588.716		520.93	1.68646	0.377602		0
CAGL0K03663g		267	81899	ChrK	339486	339752	W	CAGL-IPF13050|CAG61345.1		CAL0134607	YMR122W-A	YMR122W-A	YMR122W-A	Anc_2.416	YMR122W-A		Protein of unknown function; green fluorescent protein (GFP)-fusion protein localizes to the cytoplasm and endoplasmic reticulum				2165	2636	1765	1940	2063.96	2454.87		2259.41	1.68581	0.250233
CAGL0M02541g		132	-755195	ChrM	294479	294348	C	CAGL-IPF14365|CAG62433.1		CAL0136445							#N/A				61	127	57	80	63.1635	111.34		87.2518	1.68567	0.817809
CAGL0K02783g		789	-5688	ChrK	251638	252426	W	CAGL-IPF2232|CAGL-CDS3900.1|CAG61307.1		CAL0134955		YKL007W	YKL007W	Anc_2.503	YKL007W	CAP1	Alpha subunit of the capping protein heterodimer (Cap1p and Cap2p); capping protein (CP) binds to the barbed ends of actin filaments preventing further polymerization; localized predominantly to cortical actin patches; protein increases in abundance and relocalizes from bud neck to plasma membrane upon DNA replication stress				155	230	161	220	167.935	244.81		206.373	1.68254	0.543755
CAGL0E00341g	MTL1a	523	-216055	ChrE	29668	30190	W	CAGL-IPF9304|CAG58621.1|MATa1|MTLa1		CAL0128822	HMRA1	YCR097W			YCR097W	HMRA1	Silenced copy of a1 at HMR; homeobox corepressor that interacts with Alpha2p to repress haploid-specific gene transcription in diploid cells				191	279	149	202	179.269	258.771		219.02	1.68158	0.529546		0
CAGL0B01683g	TMN2	2076	-295866	ChrB	156350	154275	C	CAGL-IPF5249|CAGL-CDS1124.1|CAG57942.1		CAL0127750	TMN2	YLR083C	YDR107C	Anc_8.254	YDR107C	TMN2	Protein with a role in cellular adhesion and filamentous growth; similar to Tmn3p; member of the evolutionarily conserved Transmembrane Nine family of proteins with nine membrane-spanning segments; TMN2 has a paralog, EMP70, that arose from the whole genome duplication				293	397	224	294	271.932	371.637		321.784	1.67947	0.450648
CAGL0D03190g	MEU1	1014	-222334	ChrD	331747	332760	W	CAGL-IPF4770|CAGL-CDS3270.1|CAG58466.1		CAL0127959	MEU1	YLR017W	YLR017W	Anc_5.204	YLR017W	MEU1	Methylthioadenosine phosphorylase (MTAP); catalyzes the initial step in the methionine salvage pathway; affects polyamine biosynthesis through regulation of ornithine decarboxylase (Spe1p) activity; regulates ADH2 gene expression				680	859	714	840	737.627	922.32		829.973	1.67847	0.322376
CAGL0M00704g		867	-967246	ChrM	81930	82796	W	CAGL-IPF5438|CAGL-CDS3700.1|CAG62352.1		CAL0136921							#N/A				144	229	112	150	135.216	203.325		169.27	1.66686	0.588522
CAGL0L03267g	GAP1	1794	-611501	ChrL	374784	376577	W	CAGL-IPF2728|CAGL-CDS1520.1|CAG61884.1		CAL0135508	GAP1	YKR039W	YKR039W	Anc_1.244	YKR039W	GAP1	General amino acid permease; Gap1p senses the presence of amino acid substrates to regulate localization to the plasma membrane when needed; essential for invasive growth				3408	3994	3186	3521	3474.82	4059.55		3767.18	1.66463	0.224379
CAGL0I09108g		1896	90348	ChrI	884075	882180	C	CAGL-IPF8974|CAGL-CDS1344.1|CAG60579.1		CAL0132404							#N/A				1424	1879	1366	1417	1471.81	1770.15		1620.98	1.66452	0.26628
CAGL0H06985g		2637	-261891	ChrH	691854	694490	W	CAGL-IPF261|CAGL-CDS0634.1|CAG60033.1		CAL0130551	UTP14	YML093W	YML093W	Anc_8.872	YML093W	UTP14	Subunit of U3-containing Small Subunit (SSU) processome complex; involved in production of 18S rRNA and assembly of small ribosomal subunit				34	70	34	66	36.887	74.643		55.765	1.66336	1.01689
CAGL0C01947g		2118	-216682	ChrC	204411	206528	W	CAGL-IPF1095|CAGL-CDS1073.1|CAG58166.1		CAL0127658		YGL245W	YGL245W	Anc_3.569	YGL245W	GUS1	Glutamyl-tRNA synthetase (GluRS); forms a complex with methionyl-tRNA synthetase (Mes1p) and Arc1p; complex formation increases the catalytic efficiency of both tRNA synthetases and ensures their correct localization to the cytoplasm; protein abundance increases in response to DNA replication stress				1	24	0	1	1.5	13.5855		7.54275	1.66273	3.17903
CAGL0G02607g		2067	180494	ChrG	242310	240244	C	CAGL-IPF3577|CAGL-CDS1132.1|CAG59403.1		CAL0129898	PRK1		YIL095W	Anc_2.284	YIL095W	PRK1	Protein serine/threonine kinase; regulates the organization and function of the actin cytoskeleton and reduces endocytic ability of cell through the phosphorylation of the Pan1p-Sla1p-End3p protein complex; PRK1 has a paralog, ARK1, that arose from the whole genome duplication	dup			478	761	478	456	505.529	648.488		577.009	1.66266	0.359286		0
CAGL0J07326g		2427	492390	ChrJ	708554	710980	W	CAGL-IPF2372|CAGL-CDS0787.1|CAG60976.1		CAL0133348	SQS1	YNL224C	YNL224C	Anc_2.017	YNL224C	SQS1	Protein that stimulates the ATPase and helicase activities of Prp43p; acts with Prp43p to stimulate 18s rRNA maturation by Nob1p; overexpression antagonizes the suppression of splicing defects by spp382 mutants; component of pre-ribosomal particles; relocalizes from nucleus to nucleolus upon DNA replication stress				249	366	198	243	235.489	326.276		280.883	1.65932	0.470435
CAGL0I10923g		1176	285623	ChrI	1078990	1077815	C	CAGL-IPF6400|CAGL-CDS2839.1|CAG60659.1		CAL0132486	LIP5	YOR196C	YOR196C	Anc_8.606	YOR196C	LIP5	Protein involved in biosynthesis of the coenzyme lipoic acid; has similarity to E. coli lipoic acid synthase				1	18	2	12	2.611	17.026		9.8185	1.65571	2.70507
CAGL0F01155g		3318	-107824	ChrF	120079	116762	C	CAGL-IPF3737|CAGL-CDS0319.1|CAG58948.1		CAL0130992	SMC5	YOL034W	YOL034W	Anc_7.101	YOL034W	SMC5	Component of the SMC5-SMC6 complex; this complex plays a key role in the removal of X-shaped DNA structures that arise between sister chromatids during DNA replication and repair; binds single-stranded DNA and has ATPase activity; S. pombe homolog forms a heterodimer with S. pombe Rad18p that is involved in DNA repair				316	447	340	404	347.87	461.042		404.456	1.65483	0.40635
CAGL0A00341g		570	-43965	ChrA	33056	33625	W	CAGL-IPF3316|CAGL-CDS4533.1|CAG57678.1		CAL0126869	MPO1	YGL010W	YGL010W	Anc_4.109	YGL010W		Putative protein of unknown function; YGL010W is not an essential gene				358	516	360	410	379.98	499.055		439.518	1.65202	0.393275
CAGL0K11110g		2415	826054	ChrK	1084981	1082567	C	CAGL-IPF3273|CAGL-CDS0801.1|CAG61662.1		CAL0133915	YDR239C	YDR239C	YDR239C	Anc_8.463	YDR239C		Protein of unknown function; may interact with ribosomes, based on co-purification experiments				426	535	300	395	380.65	499.773		440.211	1.65102	0.392806
CAGL0L04884g		816	-427544	ChrL	560045	559230	C	CAGL-IPF4586|CAGL-CDS3823.1|CAG61958.1		CAL0135870	COG2	YGR120C	YGR120C	Anc_3.472	YGR120C	COG2	Essential component of the conserved oligomeric Golgi complex; a cytosolic tethering complex that functions in protein trafficking to mediate fusion of transport vesicles to Golgi compartments; the components of the Golgi complex are Gog1p through Cog8p				224	342	240	285	246.32	338.868		292.594	1.65053	0.460188
CAGL0L08118g		408	-94475	ChrL	892910	892503	C	CAGL-IPF12443|CAG62099.1		CAL0135638	RPS14A	YJL191W	YCR031C	Anc_1.146	YCR031C	RPS14A	Protein component of the small (40S) ribosomal subunit; required for ribosome assembly and 20S pre-rRNA processing; mutations confer cryptopleurine resistance; homologous to mammalian ribosomal protein S14 and bacterial S11; RPS14A has a paralog, RPS14B, that arose from the whole genome duplication	dup			37	106	49	58	46.7195	87.959		67.3392	1.64824	0.912806
CAGL0H01837g		2385	-777519	ChrH	178736	176352	C	CAGL-IPF5841|CAGL-CDS0828.1|CAG59812.1		CAL0131718	PTK2		YJR059W	Anc_1.507	YJR059W	PTK2	Putative serine/threonine protein kinase; involved in regulation of ion transport across plasma membrane; enhances spermine uptake; PTK2 has a paralog, PTK1, that arose from the whole genome duplication	dup			1116	1344	1015	1182	1122.83	1365.06		1243.95	1.64738	0.281823
CAGL0M00902g		351	-949488	ChrM	99946	100296	W	CAGL-IPF5457|CAGL-CDS5230.1|CAG62361.1		CAL0137429	DIF1	YML058W	YLR437C	Anc_4.316	YLR437C	DIF1	Protein that regulates nuclear localization of Rnr2p and Rnr4p; phosphorylated by Dun1p in response to DNA damage and degraded; N-terminal half shows similarity to S. pombe Spd1 protein; DIF1 has a paralog, SML1, that arose from the whole genome duplication	dup			131	281	138	121	143.159	212.346		177.752	1.64703	0.568795
CAGL0F01397g		2190	-85628	ChrF	141711	139522	C	CAGL-IPF3717|CAGL-CDS0994.1|CAG58956.1		CAL0131390	RTS1	YOR014W	YOR014W	Anc_7.106	YOR014W	RTS1	B-type regulatory subunit of protein phosphatase 2A (PP2A); Rts1p and Cdc55p are alternative regulatory subunits for PP2A catalytic subunits, Pph21p and Pph22p; PP2A-Rts1p protects cohesin when recruited by Sgo1p to the pericentromere; highly enriched at centromeres in the absence of Cdc55p; required for maintenance of septin ring organization during cytokinesis, for ring disassembly in G1 and fo…				68	141	100	127	90.55	145.858		118.204	1.64635	0.687783
CAGL0L01243g		1626	-843163	ChrL	143206	144831	W	CAGL-IPF7401|CAGL-CDS1834.1|CAG61797.1		CAL0135890	GDA1	YEL042W	YEL042W	Anc_1.485	YEL042W	GDA1	Guanosine diphosphatase located in the Golgi; involved in the transport of GDP-mannose into the Golgi lumen by converting GDP to GMP after mannose is transferred its substrate				94	93	89	183	97.4395	154.647		126.043	1.64505	0.666396
CAGL0J03432g		1869	113588	ChrJ	330031	331899	W	CAGL-IPF6905|CAGL-CDS1392.1|CAG60802.1		CAL0133454	ARK1	YNL020C	YNL020C	Anc_2.284	YNL020C	ARK1	Serine/threonine protein kinase; involved in regulation of the cortical actin cytoskeleton; involved in control of endocytosis; ARK1 has a paralog, PRK1, that arose from the whole genome duplication	dup			791	1105	720	740	796.46	986.77		891.615	1.64467	0.309112
CAGL0B02299g		1932	-232872	ChrB	217341	219272	W	CAGL-IPF871|CAGL-CDS1299.1|CAG57970.1		CAL0127928	TAF8	YML114C	YML114C	Anc_8.838	YML114C	TAF8	TFIID subunit (65 kDa); involved in RNA polymerase II transcription initiation				759	1031	717	768	778.793	966.164		872.479	1.64412	0.311027
CAGL0F02387g	PHO87	2859	4391	ChrF	232065	229207	C	CAGL-IPF5716|CAGL-CDS0507.1|CAG58998.1|PHO90		CAL0131416	PHO90	YJL198W	YJL198W	Anc_1.136	YJL198W	PHO90	Low-affinity phosphate transporter; acts upstream of Pho81p in regulation of the PHO pathway; deletion of pho84, pho87, pho89, pho90, and pho91 causes synthetic lethality; transcription independent of Pi and Pho4p activity; overexpression results in vigorous growth; PHO90 has a paralog, PHO87, that arose from the whole genome duplication				6499	7426	6130	6732	6655.72	7655.59		7155.65	1.64343	0.201919
CAGL0G03707g		1461	295416	ChrG	356929	355469	C	CAGL-IPF7134|CAGL-CDS2148.1|CAG59452.1		CAL0137531	GLO3	YER122C	YER122C	Anc_7.426	YER122C	GLO3	ADP-ribosylation factor GTPase activating protein (ARF GAP); involved in ER-Golgi transport; shares functional similarity with Gcs1p				549	709	433	518	516.032	658.789		587.41	1.64058	0.352357
CAGL0K10186g		1014	735907	ChrK	994133	993120	C	CAGL-IPF3208|CAGL-CDS3267.1|CAG61625.1		CAL0134817	RAD55	YDR076W	YDR076W	Anc_8.200	YDR076W	RAD55	Protein that stimulates strand exchange; stimulates strand exchange by stabilizing the binding of Rad51p to single-stranded DNA; involved in the recombinational repair of double-strand breaks in DNA during vegetative growth and meiosis; forms heterodimer with Rad57p				99	203	124	136	119.382	182.128		150.755	1.63649	0.609367
CAGL0H06765g	BNR1	3903	-280493	ChrH	676521	672619	C	CAGL-IPF275|CAGL-CDS0195.1|CAG60023.1		CAL0131572	BNR1	YIL159W	YIL159W	Anc_5.717	YIL159W	BNR1	Formin; nucleates the formation of linear actin filaments, involved in cell processes such as budding and mitotic spindle orientation which require the formation of polarized actin cables, functionally redundant with BNI1				493	678	412	464	476.366	611.672		544.019	1.63557	0.360688
CAGL0M05313g		741	-481333	ChrM	568646	567906	C	CAGL-IPF7187|CAGL-CDS4042.1|CAG62553.1		CAL0137023	YBR197C	YPL077C	YBR197C	Anc_8.546	YBR197C		Protein of unknown function; green fluorescent protein (GFP)-fusion protein localizes to the cytoplasm and nucleus; YBR197C is not an essential gene; relative distribution to the nucleus increases upon DNA replication stress; YBR197C has a paralog, YPL077C, that arose from the whole genome duplication	dup			36	80	58	90	51.219	93.695		72.457	1.63395	0.871293
CAGL0L10956g		2076	185505	ChrL	1173724	1171649	C	CAGL-IPF4200|CAGL-CDS1123.1|CAG62218.1		CAL0134986	RIM20	YOR275C	YOR275C	Anc_8.726	YOR275C	RIM20	Protein involved in proteolytic activation of Rim101p; part of response to alkaline pH; PalA/AIP1/Alix family member; interaction with the ESCRT-III subunit Snf7p suggests a relationship between pH response and multivesicular body formation				232	352	193	229	224.212	311.079		267.645	1.63341	0.472423		0
CAGL0E04268g		1365	161317	ChrE	406619	407983	W	CAGL-IPF2495|CAGL-CDS2353.1|CAG58792.1		CAL0128660	YML037C	YML037C	YML037C	Anc_5.582	YML037C		Putative protein of unknown function; has some characteristics of a transcriptional activator; may be a target of Dbf2p-Mob1p kinase; GFP-fusion protein co-localizes with clathrin-coated vesicles; YML037C is not an essential gene				120	187	55	89	91.5525	146.609		119.081	1.63186	0.679307
CAGL0L06116g		1179	-291463	ChrL	695130	696308	W	CAGL-IPF4497|CAGL-CDS2812.1|CAG62011.1		CAL0136156	YGL185C	YGL185C	YGL185C	Anc_8.146	YGL185C		Putative protein with sequence similar to hydroxyacid dehydrogenases; green fluorescent protein (GFP)-fusion protein localizes to the cytoplasm				162	196	99	179	136.995	203.805		170.4	1.628	0.573068
CAGL0M06325g		1980	-391329	ChrM	659269	657290	C	CAGL-IPF6144|CAGL-CDS1238.1|CAG62598.1		CAL0137409	SMP1	YPL089C	YBR182C	Anc_8.566	YBR182C	SMP1	Putative transcription factor of the MADS-box family; involved in regulating the response to osmotic stress; SMP1 has a paralog, RLM1, that arose from the whole genome duplication	dup			782	934	583	722	715.856	890.731		803.294	1.6253	0.315319		0
CAGL0L02761g		1260	-663729	ChrL	324082	322823	C	CAGL-IPF2770|CAGL-CDS2640.1|CAG61861.1		CAL0135808	STE4	YOR212W	YOR212W	Anc_8.631	YOR212W	STE4	G protein beta subunit; forms a dimer with Ste18p to activate the mating signaling pathway, forms a heterotrimer with Gpa1p and Ste18p to dampen signaling; may recruit Rho1p to the polarized growth site during mating; contains WD40 repeats				713	908	670	771	729.685	906.42		818.053	1.62195	0.312907		0
CAGL0G01122g		339	45266	ChrG	106218	105880	C	CAGL-IPF3875|CAGL-CDS5298.1|CAG59337.1		CAL0129740	CIS1	YLR346C	YLR346C	Anc_4.178	YLR346C		Putative protein of unknown function found in mitochondria; expression is regulated by transcription factors involved in pleiotropic drug resistance, Pdr1p and Yrr1p; not an essential gene; YLR346C has a paralog, YGR035C, that arose from the whole genome duplication				329	406	294	396	328.817	435.858		382.337	1.62075	0.406573
CAGL0K10340g	ADE2	1713	750756	ChrK	1009332	1007620	C	CAGL-IPF3217|CAGL-CDS1659.1|CAG61632.1		CAL0134467	ADE2	YOR128C	YOR128C	Anc_5.455	YOR128C	ADE2	Phosphoribosylaminoimidazole carboxylase; catalyzes a step in the 'de novo' purine nucleotide biosynthetic pathway; red pigment accumulates in mutant cells deprived of adenine				1	8	0	14	1.5	13.197		7.3485	1.61538	3.13718
CAGL0H03993g		1419	-582199	ChrH	373573	372155	C	CAGL-IPF1884|CAGL-CDS2236.1|CAG59901.1		CAL0131702	CIT1		YNR001C	Anc_1.422	YNR001C	CIT1	Citrate synthase; catalyzes the condensation of acetyl coenzyme A and oxaloacetate to form citrate; the rate-limiting enzyme of the TCA cycle; nuclear encoded mitochondrial protein; CIT1 has a paralog, CIT2, that arose from the whole genome duplication	dup			147	235	129	164	146.159	214.522		180.341	1.61344	0.553582		0
CAGL0L02541g		681	-686534	ChrL	300308	300988	W	CAGL-IPF2784|CAGL-CDS4196.1|CAG61851.1		CAL0135570	YIL161W	YIL161W	YIL161W	Anc_5.719	YIL161W		Putative protein of unknown function; green fluorescent protein (GFP)-fusion protein localizes to the cytoplasm; mRNA is enriched in Scp160p-associated mRNPs; YIL161W is a non-essential gene				189	272	182	238	196.601	276.349		236.475	1.61214	0.491221
CAGL0H06281g		1821	-333917	ChrH	620236	622056	W	CAGL-IPF320|CAGL-CDS1471.1|CAG60001.1		CAL0131628	TPD3	YAL016W	YAL016W	Anc_7.088	YAL016W	TPD3-B	Regulatory subunit A of the heterotrimeric PP2A complex; the heterotrimeric protein phosphatase 2A (PP2A) complex also contains regulatory subunit Cdc55p and either catalytic subunit Pph21p or Pph22p; required for cell morphogenesis and transcription by RNA polymerase III	dup			58	96	49	89	57.2195	101.109		79.1645	1.61166	0.82134
CAGL0B03619g		1407	-88904	ChrB	361572	362978	W	CAGL-IPF751|CAGL-CDS2268.1|CAG58029.1		CAL0127730	PRB1		YEL060C	Anc_6.014	YEL060C	PRB1	Vacuolar proteinase B (yscB); serine protease of the subtilisin family; involved in protein degradation in the vacuole and required for full protein degradation during sporulation; activity inhibited by Pbi2p; protein abundance increases in response to DNA replication stress; PRB1 has a paralog, YSP3, that arose from the whole genome duplication	dup			329	387	325	446	346.038	455.633		400.835	1.61104	0.396944
CAGL0J00165g		324	-204961	ChrJ	12254	12577	W	CAGL-IPF7824|CAGL-CDS5408.1|CAG60666.1		CAL0133522	RPS25A	YLR333C	YGR027C	Anc_4.163	YGR027C	RPS25A	Protein component of the small (40S) ribosomal subunit; homologous to mammalian ribosomal protein S25, no bacterial homolog; RPS25A has a paralog, RPS25B, that arose from the whole genome duplication				44	104	49	66	50.2195	91.643		70.9313	1.60962	0.867777
CAGL0H06743g		543	-282943	ChrH	671849	672391	W	CAGL-IPF276|CAGL-CDS4599.1|CAG60022.1		CAL0131880	COA1	YIL157C	YIL157C	Anc_5.715	YIL157C	COA1	Mitochondrial inner membrane protein; required for assembly of the cytochrome c oxidase complex (complex IV); interacts with complex IV assembly factor Shy1p during the early stages of assembly				17	35	14	44	17.277	44.262		30.7695	1.60633	1.35722
CAGL0G08085g		4737	704770	ChrG	763185	767921	W	CAGL-IPF9152|CAGL-CDS0088.1|CAG59641.1		CAL0130795	DNF2		YDR093W	Anc_8.231	YDR093W	DNF2	Aminophospholipid translocase (flippase); localizes primarily to the plasma membrane; contributes to endocytosis, protein transport and cell polarity; type 4 P-type ATPase; DNF2 has a paralog, DNF1, that arose from the whole genome duplication	dup			609	792	568	651	621.024	778.16		699.592	1.60562	0.325419
CAGL0K11682g		549	869871	ChrK	1127865	1127317	C	CAGL-IPF8519|CAGL-CDS4587.1|CAG61687.1		CAL0134281	ATG31	YDR022C	YDR022C	Anc_3.250	YDR022C	ATG31	Autophagy-specific protein required for autophagosome formation; may form a complex with Atg17p and Atg29p that localizes other proteins to the pre-autophagosomal structure; high-copy suppressor of CIK1 deletion				93	146	61	100	81.3855	132.55		106.968	1.60469	0.703693
CAGL0L12078g		1227	313454	ChrL	1300023	1301249	W	CAGL-IPF8327|CAGL-CDS2715.1|CAG62267.1		CAL0136014	PDA1	YER178W	YER178W	Anc_8.246	YER178W	PDA1	E1 alpha subunit of the pyruvate dehydrogenase (PDH) complex; catalyzes the direct oxidative decarboxylation of pyruvate to acetyl-CoA; phosphorylated; regulated by glucose				15	78	28	25	24.054	54.6375		39.3458	1.60465	1.18361
CAGL0H04741g		714	-501271	ChrH	454148	453435	C	CAGL-IPF4474|CAGL-CDS4101.1|CAG59934.1		CAL0131850	ERV25	YML012W	YML012W	Anc_5.540	YML012W	ERV25	Member of the p24 family involved in ER to Golgi transport; forms a heterotrimeric complex with Erp1, Erp2p, and Emp24,				12	39	27	53	21.9985	51.5315		36.765	1.60408	1.22805
CAGL0E02893g		2793	28874	ChrE	273462	276254	W	CAGL-IPF9202|CAGL-CDS0554.1|CAG58734.1		CAL0128922	RRN6	YBL014C	YBL014C	Anc_4.091	YBL014C	RRN6	Component of the core factor (CF) rDNA transcription factor complex; CF is required for transcription of 35S rRNA genes by RNA polymerase I and is composed of Rrn6p, Rrn7p, and Rrn11p				534	791	532	537	563.526	710.913		637.22	1.60399	0.335192
CAGL0E05038g		4455	245029	ChrE	488786	493240	W	CAGL-IPF5008|CAGL-CDS0110.1|CAG58826.1		CAL0128574	INO80	YGL150C	YGL150C	Anc_2.317	YGL150C	INO80	ATPase and nucleosome spacing factor; subunit of complex containing actin and actin-related proteins that has chromatin remodeling activity and 3' to 5' DNA helicase activity in vitro; has a role in modulating stress gene transcription				92	170	64	82	82.552	134.011		108.281	1.60347	0.698976
CAGL0K10516g		486	767951	ChrK	1025913	1025428	C	CAGL-IPF3225|CAGL-CDS4722.1|CAG61639.1		CAL0133861	MIC19	YFR011C	YFR011C	Anc_1.370	YFR011C	AIM13	Mitochondrial protein peripheral to the inner membrane; component of the mitochondrial inner membrane organizing system (MINOS, MitOS, or MICOS), a scaffold-like structure on the intermembrane space side of the inner membrane which has a role in the maintenance of crista junctions and inner membrane architecture				188	254	135	197	169.993	243.344		206.668	1.60237	0.517523
CAGL0G01540g	NCE103	660	83698	ChrG	144810	144151	C	CA|NCE3|CAGL-IPF3846|CAGL-CDS4255.1|CAG59355.1		CAL0130741	NCE103	YNL036W	YNL036W	Anc_2.275	YNL036W	NCE103	Carbonic anhydrase; metalloenzyme that catalyzes CO2 hydration to bicarbonate, which is an important metabolic substrate, and protons; not expressed under conditions of high CO2, such as inside a growing colony, but transcription is induced in response to low CO2 levels, such as on the colony surface in ambient air; poorly transcribed under aerobic conditions and at an undetectable level under an…				184	326	262	277	238.541	326.183		282.362	1.59578	0.451447
CAGL0A04455g	SEF1	3297	361888	ChrA	437546	440842	W	CAGL-IPF1139|CAGL-CDS0323.1|CAG57854.1|ZCF3		CAL0126549	SEF1	YBL066C	YBL066C	Anc_7.389	YBL066C	SEF1	Putative transcription factor; has homolog in Kluyveromyces lactis				1636	2089	1498	1565	1651.14	1961.81		1806.47	1.59498	0.248722		0
CAGL0H04147g		819	-561829	ChrH	392825	393643	W	CAGL-IPF1870|CAGL-CDS3813.1|CAG59908.1		CAL0129445							#N/A				805	882	725	939	806.237	991.784		899.011	1.59385	0.298822
CAGL0M02255g		1077	-778457	ChrM	270614	271690	W	CAGL-IPF6624|CAGL-CDS3095.1|CAG62420.1		CAL0137449	RRD2	YPL152W	YPL152W	Anc_8.674	YPL152W	RRD2	Peptidyl-prolyl cis/trans-isomerase; also activates the phosphotyrosyl phosphatase activity of protein phosphatase 2A (PP2A); regulates G1 phase progression, the osmoresponse, microtubule dynamics; subunit of the Tap42p-Pph21p-Rrd2p complex; protein abundance increases in response to DNA replication stress				150	170	135	228	150.993	219.494		185.243	1.59202	0.539705
CAGL0G07931g		459	690113	ChrG	751125	750667	C	CAGL-IPF8242|CAGL-CDS4819.1|CAG59634.1		CAL0129329	MRPS12	YNR036C	YNR036C	Anc_6.352	YNR036C	MRPS12	Mitochondrial protein; may interact with ribosomes based on co-purification experiments; similar to E. coli and human mitochondrial S12 ribosomal proteins				3	13	18	49	12.499	36.1895		24.3443	1.59127	1.53376
CAGL0F01815g		945	-46303	ChrF	180414	179470	C	CAGL-IPF5749|CAGL-CDS3476.1|CAG58975.1		CAL0129601							#N/A				4241	5005	4223	4527	4467.38	5154.06		4810.72	1.59083	0.206281
CAGL0A02486g		2601	190049	ChrA	266055	268655	W	CAGL-IPF2948|CAGL-CDS0655.1|CAG57765.1		CAL0126889	SBE2	YHR103W	YDR351W	Anc_5.407	YDR351W	SBE2	Protein required for bud growth; involved in transport of cell wall components from the Golgi to the cell surface; SBE2 has a paralog, SBE22, that arose from the whole genome duplication	dup			131	152	95	176	119.273	180.048		149.66	1.59016	0.59412		0
CAGL0L06886g		1264	-209788	ChrL	778025	776762	C	CAGL-IPF7666|CAGL-CDS4630.1|CAG62046.2		CAL0135408	RPL13A	YMR142C	YDL082W	Anc_2.387	YDL082W	RPL13A	Ribosomal 60S subunit protein L13A; not essential for viability; homologous to mammalian ribosomal protein L13, no bacterial homolog; RPL13A has a paralog, RPL13B, that arose from the whole genome duplication				23	60	21	40	24.1655	54.42		39.2927	1.58663	1.17119
CAGL0M13893g		2433	326421	ChrM	1377246	1374814	C	CAGL-IPF6044|CAGL-CDS0784.1|CAG62928.1		CAL0137483	NIP1	YMR309C	YMR309C	Anc_5.009	YMR309C	NIP1	eIF3c subunit of the eukaryotic translation initiation factor 3 (eIF3); involved in the assembly of preinitiation complex and start codon selection				24	53	18	43	22.999	52.6765		37.8377	1.58655	1.19559
CAGL0I04334g		1278	-405039	ChrI	388379	387102	C	CAGL-IPF5921|CAGL-CDS2604.1|CAG60374.1		CAL0132756	LCB3		YJL134W	Anc_1.217	YJL134W	LCB3	Long-chain base-1-phosphate phosphatase; specific for dihydrosphingosine-1-phosphate, regulates ceramide and long-chain base phosphates levels, involved in incorporation of exogenous long chain bases in sphingolipids; LCB3 has a paralog, YSR3, that arose from the whole genome duplication	dup			319	463	288	326	320.484	423.373		371.929	1.58437	0.401677
CAGL0B04807g		1260	10172	ChrB	460721	461980	W	CAGL-IPF659|CAGL-CDS2644.1|CAG58079.1		CAL0127762	HRB1		YCL011C	Anc_1.408	YCL011C	GBP2	Poly(A+) RNA-binding protein; involved in the export of mRNAs from the nucleus to the cytoplasm; similar to Npl3p; also binds single-stranded telomeric repeat sequence in vitro; relocalizes to the cytosol in response to hypoxia; GBP2 has a paralog, HRB1, that arose from the whole genome duplication	dup			1349	1569	1192	1393	1337.66	1601.1		1469.38	1.58265	0.259358
CAGL0F08151g		1797	580862	ChrF	808005	806209	C	CAGL-IPF590|CAGL-CDS1515.1|CAG59247.1		CAL0131114	BRF1	YGR246C	YGR246C	Anc_5.080	YGR246C	BRF1	TFIIIB B-related factor; one of three subunits of RNA polymerase III transcription initiation factor TFIIIB, binds TFIIIC and TBP and recruits RNA pol III to promoters, amino-terminal half is homologous to TFIIB				191	261	164	226	187.602	263.823		225.712	1.58246	0.491895
CAGL0E04356g		711	172461	ChrE	418800	418090	C	CAGL-IPF2506|CAGL-CDS4106.1|CAG58796.1		CAL0128700	SOD2	YHR008C	YHR008C	Anc_5.590	YHR008C	SOD2	Mitochondrial manganese superoxide dismutase; protects cells against oxygen toxicity; phosphorylated				4273	5868	4441	4047	4604.48	5304.52		4954.5	1.58156	0.204185
CAGL0A04367g		363	354394	ChrA	431881	431519	C	CAGL-IPF1143|CAGL-CDS5172.1|CAG57850.1		CAL0126813	YBL059W		YBL059W	Anc_7.381	YBL059W		Putative protein of unknown function; the authentic, non-tagged protein is detected in highly purified mitochondria in high-throughput studies; YBL059W has a paralog, YER093C-A, that arose from the whole genome duplication	dup			12	58	11	12	13.1105	37.026		25.0682	1.57998	1.49782
CAGL0L02673g		2565	-670741	ChrL	317723	315159	C	CAGL-IPF2776|CAGL-CDS0680.1|CAG61857.1		CAL0135256	RFC1	YOR217W	YOR217W	Anc_8.637	YOR217W	RFC1	Subunit of heteropentameric Replication factor C (RF-C); RF-C is a DNA binding protein and ATPase that acts as a clamp loader of the proliferating cell nuclear antigen (PCNA) processivity factor for DNA polymerases delta and epsilon				204	297	189	237	207.989	288.264		248.127	1.57724	0.470877
CAGL0J10714g		972	829909	ChrJ	1046800	1047771	W	CAGL-IPF2850|CAGL-CDS3378.1|CAG61128.1		CAL0133460							#N/A				139	263	161	166	159.935	229.693		194.814	1.57537	0.522217
CAGL0G01562g		726	85376	ChrG	146521	145796	C	CAGL-IPF3844|CAGL-CDS4074.1|CAG59356.1		CAL0129188	GPI15	YNL038W	YNL038W	Anc_2.281	YNL038W	GPI15	Protein involved in the synthesis of GlcNAc-PI; GlcNAc-PI is the first intermediate in the synthesis of glycosylphosphatidylinositol (GPI) anchors; homologous to the human PIG-H protein; GlcNAc-PI stands for N-acetylglucosaminyl phosphatidylinositol				916	1140	942	1061	982.281	1192.22		1087.25	1.57455	0.279437
CAGL0I06226g		1368	-194576	ChrI	597520	598887	W	CAGL-IPF1409|CAGL-CDS2348.1|CAG60458.1		CAL0132588	JJJ2	YJL162C	YJL162C	Anc_1.185	YJL162C	JJJ2	Protein of unknown function; contains a J-domain, which is a region with homology to the E. coli DnaJ protein				480	647	366	417	444.313	568.654		506.483	1.57412	0.355973
CAGL0G00946g		597	24522	ChrG	85007	85603	W	CAGL-IPF3893|CAGL-CDS5071.1|CAG59329.1		CAL0137687		YGR029W	YGR029W	Anc_4.167	YGR029W	ERV1	Flavin-linked sulfhydryl oxidase of the mitochondrial IMS; N-terminus is an intrinsically disordered domain that in the cytosol helps target Erv1p to mitochondria, and in the intermembrane space oxidizes Mia40p as part of a disulfide relay system that promotes intermembrane space retention of imported proteins; ortholog of human hepatopoietin (ALR)				240	379	212	230	238.766	325.165		281.966	1.57411	0.445575
CAGL0K01067g		555	-149901	ChrK	108096	107542	C	CAGL-IPF5127|CAGL-CDS4567.1|CAG61232.1		CAL0134943	TOM20	YGR082W	YGR082W	Anc_3.410	YGR082W	TOM20	Component of the TOM (translocase of outer membrane) complex; responsible for recognition and initial import steps for all mitochondrially directed proteins; acts as a receptor for incoming precursor proteins				114	183	54	81	87.997	139.925		113.961	1.57366	0.669133
CAGL0M11154g		2973	50109	ChrM	1098232	1101204	W	CAGL-IPF8836|CAGL-CDS0459.1|CAG62805.1		CAL0136355		YDR060W	YDR060W	Anc_3.309	YDR060W	MAK21	Constituent of 66S pre-ribosomal particles; required for large (60S) ribosomal subunit biogenesis; involved in nuclear export of pre-ribosomes; required for maintenance of dsRNA virus; homolog of human CAATT-binding protein				0	10	2	15	2.111	14.7825		8.44675	1.57143	2.80789
CAGL0J05654g		4707	325686	ChrJ	540710	545416	W	CAGL-IPF7940|CAGL-CDS0090.1|CAG60902.1		CAL0133750	THO2	YNL139C	YNL139C	Anc_2.125	YNL139C	THO2	Subunit of the THO complex; THO is required for efficient transcription elongation and involved in transcriptional elongation-associated recombination; required for LacZ RNA expression from certain plasmids				57	106	48	76	56.164	98.498		77.331	1.57141	0.810449
CAGL0I00506g		1866	-753710	ChrI	40002	38137	C	CAGL-IPF2007|CAGL-CDS1397.1|CAG60212.1		CAL0132680	ECM38	YLR299W	YLR299W	Anc_6.096	YLR299W	ECM38	Gamma-glutamyltranspeptidase; major glutathione-degrading enzyme; involved in detoxification of electrophilic xenobiotics; expression induced mainly by nitrogen starvation				825	1068	715	784	810.683	994.032		902.357	1.57069	0.294155
CAGL0H00132g		3364	-949152	ChrH	7592	4229	C	CAGL-IPF11660|CAGL0H00154g|CAGL-IPF13513|CAGL0H00176g|CAGL-IPF7276|CAGL-IPF16437|CAGL0H00198g		CAL0131894							#N/A				670	838	612	714	675.966	838.047		757.006	1.56895	0.31008
CAGL0J11814g		816	935693	ChrJ	1153477	1152662	C	CAGL-IPF2935|CAGL-CDS3821.1|CAG61178.1		CAL0133132	VPS71	YML041C	YML041C	Anc_5.511	YML041C	VPS71	Nucleosome-binding component of the SWR1 complex; SWR1 exchanges histone variant H2AZ (Htz1p) for chromatin-bound histone H2A; required for vacuolar protein sorting				134	188	69	116	106.329	162.918		134.624	1.56794	0.615604
CAGL0K03465g		2034	63327	ChrK	320030	322063	W	CAGL-IPF2184|CAGL-CDS1164.1|CAG61336.1		CAL0134243	ILV2	YMR108W	YMR108W	Anc_2.441	YMR108W	ILV2	Acetolactate synthase; catalyses the first common step in isoleucine and valine biosynthesis and is the target of several classes of inhibitors, localizes to the mitochondria; expression of the gene is under general amino acid control				23	53	28	55	28.054	59.7025		43.8783	1.56749	1.08958
CAGL0E02717g		978	12213	ChrE	258685	257708	C	CAGL-IPF7982|CAGL-CDS3367.1|CAG58726.1		CAL0129090	TSR3	YOR006C	YOR006C	Anc_6.019	YOR006C	TSR3	Protein required for 20S pre-rRNA processing; involved in processing of the 20S pre-rRNA at site D to generate mature 18S rRNA; green fluorescent protein (GFP)-fusion protein localizes to both the cytoplasm and the nucleus; relative distribution to the nucleus increases upon DNA replication stress				920	1273	927	933	975.948	1183.77		1079.86	1.56635	0.278514
CAGL0I08019g		3858	-7718	ChrI	786990	783133	C	CAGL-IPF4321|CAGL-CDS0197.1|CAG60535.1		CAL0132532	YOL075C	YOL075C	YOL075C	Anc_3.133	YOL075C		Putative ABC transporter				3495	4237	2820	2940	3315.01	3840.87		3577.94	1.56218	0.21242
CAGL0K04917g	RAP1	2064	220366	ChrK	479117	477054	C	CAGL-IPF4009|CAGL-CDS1136.1|CAG61401.1		CAL0134343	RAP1	YNL216W	YNL216W	Anc_2.029	YNL216W	RAP1	Essential DNA-binding transcription regulator that binds many loci; involved in transcription activation and repression, chromatin silencing, and telomere length maintenance; relocalizes to the cytosol in response to hypoxia; conserved protein with an N-terminal BRCT domain, a central region with homology to the Myb DNA binding domain, and a C-terminal Rap1-specific protein-interaction domain (RC…				4	15	1	17	3.5555	18.4535		11.0045	1.55573	2.37577
CAGL0J06374g		834	390499	ChrJ	608292	607459	C	CAGL-IPF13664|CAR58046.1		CAL0133004		YDL130W	YDL130W	Anc_7.293	YDL130W	RPP1B	Ribosomal protein P1 beta; component of the ribosomal stalk, which is involved in interaction of translational elongation factors with ribosome; accumulation is regulated by phosphorylation and interaction with the P2 stalk component				4	40	3	0	4.6665	21		12.8332	1.55559	2.16998
CAGL0K03223g		1797	39549	ChrK	296371	298167	W	CAGL-IPF2203|CAGL-CDS1513.1|CAG61326.1		CAL0133875	APM2	YHL019C	YHL019C	Anc_2.555	YHL019C	APM2	Protein of unknown function; homologous to the medium chain of mammalian clathrin-associated protein complex; involved in vesicular transport				1082	1366	968	1054	1079.72	1301.12		1190.42	1.55449	0.269088
CAGL0C05599g		3105	117855	ChrC	541559	538455	C	CAGL-IPF4061|CAGL-CDS0396.1|CAG58324.1		CAL0127560		YDL240W	YDL240W	Anc_2.002	YDL240W	LRG1	GTPase-activating protein (GAP); contains Rho1p-specific GAP activity, interacting with activated forms of Rho1p; functions along with Sac7p as a negative regulator of the Pkc1p-mediated cell wall integrity signaling pathway; negative regulator of cell wall 1,3-beta-glucan biosynthesis; required for efficient cell fusion; contains a RhoGAP domain and three Lin-11-Isl1-Mec-3 (LIM) domains				519	669	476	556	524.918	661.038		592.978	1.55375	0.332641		0
CAGL0C01573g		1071	-250923	ChrC	170694	171764	W	CAGL-IPF7260|CAGL-CDS3112.1|CAG58149.1		CAL0127526	ARO4	YBR249C	YBR249C	Anc_6.168	YBR249C	ARO4	3-deoxy-D-arabino-heptulosonate-7-phosphate (DAHP) synthase; catalyzes the first step in aromatic amino acid biosynthesis and is feedback-inhibited by tyrosine or high concentrations of phenylalanine or tryptophan; relative distribution to the nucleus increases upon DNA replication stress				5717	6854	5493	5692	5910.86	6760.67		6335.76	1.55321	0.193797
CAGL0L01573g		474	-810524	ChrL	176421	176894	W	CAGL-IPF7419|CAGL-CDS4760.1|CAG61811.1		CAL0135340	YML053C	YML053C	YML053C	Anc_1.503	YML053C		Putative protein of unknown function; green fluorescent protein (GFP)-fusion protein localizes to the cytoplasm and the nucleus; overexpression causes a cell cycle delay or arrest; YML053C is not an essential gene				269	379	289	344	296.039	391.912		343.976	1.54869	0.40474
CAGL0J06556g		3237	415219	ChrJ	630978	634214	W	CAGL-IPF2325|CAGL-CDS0343.1|CAG60942.1		CAL0133586	MDM1	YML104C	YML104C	Anc_8.824	YML104C	MDM1	Intermediate filament protein; required for nuclear and mitochondrial transmission to daughter buds; contains a Phox homology (PX) domain and specifically binds phosphatidylinositol 3-phosphate (PtdIns-3-P)				112	168	89	132	106.44	162.286		134.363	1.54844	0.608505
CAGL0H00143g		390	-947665	ChrH	7592	7203	C	CAGL0H00132g.2		CAL0000206985							#N/A				3	46	17	18	11.9435	34.539		23.2413	1.54816	1.532
CAGL0L07986g		1935	-114010	ChrL	872205	874139	W	CAGL-IPF7611|CAGL-CDS1297.1|CAG62093.1		CAL0135724	NPP1	YEL016C	YCR026C	Anc_1.444	YCR026C	NPP1	Nucleotide pyrophosphatase/phosphodiesterase; mediates extracellular nucleotide phosphate hydrolysis along with Npp2p and Pho5p; activity and expression enhanced during conditions of phosphate starvation; involved in spore wall assembly; NPP1 has a paralog, NPP2, that arose from the whole genome duplication, and an npp1 npp2 double mutant exhibits reduced dityrosine fluorescence relative to the s…				2791	3254	2434	2678	2748.59	3195.97		2972.28	1.5477	0.217563
CAGL0H03927g		1407	-588748	ChrH	367018	365612	C	CAGL-IPF1891|CAGL-CDS2207.1|CAG59898.1		CAL0131982	STP22	YCL008C	YCL008C	Anc_1.412	YCL008C	STP22	Component of the ESCRT-I complex; ESCRT-I is involved in ubiquitin-dependent sorting of proteins into the endosome; homologous to the mouse and human Tsg101 tumor susceptibility gene; mutants exhibit a Class E Vps phenotype				85	155	89	114	92.9395	145.247		119.093	1.54747	0.644145
CAGL0F04851g		1779	263448	ChrF	490582	488804	C	CAGL-IPF1651|CAGL-CDS1540.1|CAG59106.1		CAL0129939	NCA2	YPR155C	YPR155C	Anc_3.502	YPR155C	NCA2	Protein that regulates expression of Fo-F1 ATP synthase subunits; involved in the regulation of mitochondrial expression of subunits 6 (Atp6p) and 8 (Atp8p) of the Fo-F1 ATP synthase; functions with Nca3p				232	342	252	296	256.986	345.308		301.147	1.5466	0.426194
CAGL0B04785g		801	8615	ChrB	459394	460194	W	CAGL-IPF662|CAGL-CDS3858.1|CAG58078.1		CAL0127862		YCL010C	YCL010C	Anc_1.409	YCL010C	SGF29	Component of the HAT/Core module of the SAGA, SLIK, and ADA complexes; HAT/Core module also contains Gcn5p, Ngg1p, and Ada2p; binds methylated histone H3K4; involved in transcriptional regulation through SAGA and TBP recruitment to target promoters and H3 acetylation				129	159	138	215	142.159	206.382		174.271	1.54348	0.537815
CAGL0F06325g		2685	396832	ChrF	624419	621735	C	CAGL-IPF443|CAGL-CDS0608.1|CAG59166.1		CAL0129248	STB2		YMR053C	Anc_2.616	YMR053C	STB2	Protein that interacts with Sin3p in a two-hybrid assay; part of a large protein complex with Sin3p and Stb1p; STB2 has a paralog, STB6, that arose from the whole genome duplication	dup			412	525	441	532	451.976	574.986		513.481	1.54317	0.347282
CAGL0K13013g		441	1036369	ChrK	1294309	1293869	C	Novel_proteincoding35		CAL0000210880							#N/A				0	16	0	3	1	10.7565		5.87825	1.54294	3.42714
CAGL0H10472g		1074	65744	ChrH	1020270	1021343	W	CAGL-IPF2|CAGL-CDS4016.1|CAG60186.1		CAL0130547	IWR1	YDL115C	YDL115C	Anc_2.322	YDL115C	IWR1	RNA polymerase II transport factor, conserved from yeast to humans; also has a role in transporting RNA polymerase III into the nucleus; interacts with most of the RNAP II subunits; nucleo-cytoplasmic shuttling protein; deletion causes hypersensitivity to K1 killer toxin; protein increases in abundance and relocalizes from nucleus to cytoplasm upon DNA replication stress				1320	1493	935	1139	1180.39	1414.38		1297.39	1.54216	0.260908
CAGL0M01936g		2844	-813295	ChrM	237735	234892	C	CAGL-IPF6372|CAGL-CDS0518.1|CAG62405.1		CAL0136615	PFF1	YBR074W	YBR074W	Anc_3.295	YBR074W	PFF1	Multi-spanning vacuolar membrane protease; glycosylated transmembrane protein bearing homology to the M28 family of metalloproteases; has a lumenal-facing protease domain; proposed role in vacuole physiology				133	194	98	142	121.939	181.141		151.54	1.53703	0.570954
CAGL0H08756g		249	-101219	ChrH	853968	853720	C	CAGL-IPF127|CAG60112.1		CAL0131760							#N/A				216	271	207	288	223.988	305.124		264.556	1.53452	0.445971
CAGL0J03245g		555	97512	ChrJ	314612	315166	W	Cagl0J.mRNA.at.516.p|CAR58043.1		CAL0129873	YOS1	YER074W-A	YER074W-A	Anc_7.263	YER074W-A	YOS1	Integral membrane protein required for ER to Golgi transport; localized to the Golgi, the ER, and COPII vesicles; interacts with Yip1p and Yif1p				14	31	5	27	10.7775	32.3085		21.543	1.53286	1.58389
CAGL0C03762g		699	-47681	ChrC	374122	374820	W	CAGL-IPF936|CAGL-CDS4151.1|CAG58246.1		CAL0127266		YIL007C	YIL007C	Anc_7.130	YIL007C	NAS2	Proteasome-interacting protein; involved in the assembly of the base subcomplex of the 19S proteasomal regulatory particle (RP); similar to mammalian proteasomal modulator subunit; non-essential gene; interacts with Rpn4p; protein abundance increases in response to DNA replication stress				2957	3224	2594	3027	2920.47	3385.31		3152.89	1.53244	0.213088
CAGL0H07623g		867	-208350	ChrH	746280	747146	W	CAGL-IPF210|CAGL-CDS3696.1|CAG60062.1		CAL0130380	RMR1	YGL250W	YGL250W	Anc_3.577	YGL250W	RMR1	Protein required for meiotic recombination and gene conversion; null mutant displays reduced PIS1 expression and growth defects on non-fermentable carbon sources and minimal media; GFP-fusion protein localizes to both cytoplasm and nucleus				3	33	10	17	8.055	27.4535		17.7542	1.53202	1.76903
CAGL0F07601g	CWP1.1	657	512495	ChrF	739068	738412	C	CAGL-IPF545|CAGL-CDS4266.1|CAG59222.1		CAL0131282	CWP2	YKL096W-A	YKL096W-A	Anc_2.484	YKL096W-A	CWP2	Covalently linked cell wall mannoprotein; major constituent of the cell wall; plays a role in stabilizing the cell wall; involved in low pH resistance; precursor is GPI-anchored				776	1062	853	883	862.841	1049		955.919	1.53076	0.281842		0
CAGL0E02233g		801	-29650	ChrE	215934	216734	W	CAGL-IPF9176|CAGL-CDS3861.1|CAG58706.1		CAL0128632		YNL289W	YNL289W	Anc_3.070	YNL289W	PCL1	Cyclin, interacts with cyclin-dependent kinase Pho85p; member of the Pcl1,2-like subfamily, involved in the regulation of polarized growth and morphogenesis and progression through the cell cycle; is ubiquitinated by Dma1p; phosphorylation by Pho85p targets it for degradation; localizes to sites of polarized cell growth				7687	8762	7342	7887	7922.98	8999.84		8461.41	1.5262	0.183856
CAGL0L01089g	GLT1	6459	-860056	ChrL	130355	123897	C	CAGL-IPF8889|CAGL-CDS0023.1|CAG61791.1		CAL0136152	GLT1	YDL171C	YDL171C	Anc_7.361	YDL171C	GLT1	NAD(+)-dependent glutamate synthase (GOGAT); synthesizes glutamate from glutamine and alpha-ketoglutarate; with Gln1p, forms the secondary pathway for glutamate biosynthesis from ammonia; expression regulated by nitrogen source				1980	2198	1744	2045	1959.79	2297.35		2128.57	1.52506	0.229269
CAGL0F03597g		1498	125251	ChrF	350747	352244	W	CAGL-IPF1753|CAGL-CDS2410.1|CAG59050.1		CAL0130936	SPT14	YPL175W	YPL175W	Anc_8.703	YPL175W	SPT14	UDP-glycosyltransferase subunit of the GPI-GnT complex; UDP-GlcNAc-binding and catalytic subunit of the enzyme that mediates the first step in glycosylphosphatidylinositol (GPI) biosynthesis, mutations cause defects in transcription and in biogenesis of cell wall proteins				21	75	20	21	22.61	50.7955		36.7028	1.52388	1.16774
CAGL0J10406g		1131	798497	ChrJ	1016439	1015309	C	CAGL-IPF2828|CAGL-CDS2927.1|CAG61115.1		CAL0129699	ARC1	YGL105W	YGL105W	Anc_6.153	YGL105W	ARC1	Protein that binds tRNA and methionyl- and glutamyl-tRNA synthetases; involved in tRNA delivery, stimulating catalysis, and ensuring localization; also binds quadruplex nucleic acids; protein abundance increases in response to DNA replication stress; methionyl-tRNA synthetase is Mes1p; glutamyl-tRNA synthetase is Gus1p				43	85	25	46	36.3875	70.433		53.4102	1.52327	0.952809
CAGL0H04367g	WAR1	2838	-543388	ChrH	413093	410256	C	CAGL-IPF1854|CAGL-CDS0534.1|CAG59918.1|ZCF22		CAL0131876	WAR1	YML076C	YML076C	Anc_4.344	YML076C	WAR1	Homodimeric Zn2Cys6 zinc finger transcription factor; binds to a weak acid response element to induce transcription of PDR12 and FUN34, encoding an acid transporter and a putative ammonia transporter, respectively				615	776	430	504	547.365	684.092		615.728	1.52182	0.321687		0
CAGL0G07403g		2550	641047	ChrG	703104	700555	C	CAGL-IPF9333|CAGL-CDS4464.1|CAG59610.1		CAL0129239	SRC1		YML034W	Anc_5.577	YML034W	SRC1	Inner nuclear membrane protein; functions in regulation of subtelomeric genes and is linked to TREX (transcription export) factors; SRC1 produces 2 splice variant proteins with different functions; alternative splicing of SRC1 pre-mRNA is promoted by Hub1p; mutant has aneuploidy tolerance; SEC1 has a paralog, HEH2, that arose from the whole genome duplication	dup			166	314	181	169	184.546	256.95		220.748	1.5215	0.477508
CAGL0H04609g		8292	-517418	ChrH	441790	433499	C	CAGL-IPF1838|CAGL-CDS0009.1|CAG59928.1		CAL0131518	TEL1	YBL088C	YBL088C	Anc_7.418	YBL088C	TEL1	Protein kinase primarily involved in telomere length regulation; contributes to cell cycle checkpoint control in response to DNA damage; functionally redundant with Mec1p; regulates P-body formation induced by replication stress; homolog of human ataxia-telangiectasia mutated (ATM) gene, the gene responsible for ataxia telangiectasia (AT) (OMIM 607585)				471	620	381	440	448.145	568.62		508.383	1.52097	0.343498
CAGL0G04367g		1653	351543	ChrG	411500	413152	W	CAGL-IPF5625|CAGL-CDS1763.1|CAG59476.1		CAL0130396	CCT7	YJL111W	YJL111W	Anc_1.248	YJL111W	CCT7	Subunit of the cytosolic chaperonin Cct ring complex; related to Tcp1p, required for the assembly of actin and tubulins in vivo; mutant has increased aneuploidy tolerance				0	18	0	1	1	10.5855		5.79275	1.51904	3.40402
CAGL0J08822g		1332	655156	ChrJ	871867	873198	W	CAGL-IPF6999|CAGL-CDS2456.1|CAG61043.1		CAL0133554	CLB4	YLR210W	YLR210W	Anc_7.332	YLR210W	CLB4	B-type cyclin involved in cell cycle progression; activates Cdc28p to promote the G2/M transition; may be involved in DNA replication and spindle assembly; accumulates during S phase and G2, then targeted for ubiquitin-mediated degradation; CLB4 has a paralog, CLB3, that arose from the whole genome duplication	dup			314	407	273	344	309.651	405.912		357.782	1.51743	0.390522
CAGL0K08888g		1605	633954	ChrK	892476	890872	C	CAGL-IPF3071|CAGL-CDS1870.1|CAG61570.1		CAL0134595	GCD1	YOR260W	YOR260W	Anc_8.709	YOR260W	GCD1	Gamma subunit of the translation initiation factor eIF2B; the guanine-nucleotide exchange factor for eIF2; activity subsequently regulated by phosphorylated eIF2; first identified as a negative regulator of GCN4 expression				545	775	467	475	532.918	666.612		599.765	1.51424	0.322933
CAGL0L05676g		6636	-362133	ChrL	621731	628366	W	CAGL-IPF4536|CAGL-CDS0022.1|CAG61992.1		CAL0135348	URA2	YJL130C	YJL130C	Anc_1.223	YJL130C	URA2	Carbamoylphosphate synthetase-aspartate transcarbamylase; catalyzes the first two enzymatic steps in the de novo biosynthesis of pyrimidines; both activities are subject to feedback inhibition by UTP; CPSase is short for carbamoylphosphate synthetase and ATCase is short for aspartate transcarbamylase				8260	11930	9721	8236	9531.02	10788.2		10159.6	1.51324	0.178749
CAGL0A03256g		1887	255216	ChrA	331579	333465	W	CAGL-IPF1243|CAGL-CDS1357.1|CAG57802.1		CAL0126939	MUS81	YDR386W	YDR386W	Anc_5.468	YDR386W	MUS81	Subunit of structure-specific Mms4p-Mus81p endonuclease; cleaves branched DNA; involved in DNA repair, replication fork stability, and joint molecule formation/resolution during meiotic recombination; promotes template switching during break-induced replication (BIR), causing non-reciprocal translocations (NRTs); helix-hairpin-helix protein; phosphorylation of non-catalytic subunit Mms4p by Cdc28…				3	13	8	30	6.944	25.065		16.0045	1.5102	1.85184
CAGL0D02904g		2664	-250304	ChrD	305615	302952	C	CAGL-IPF8652|CAGL-CDS0624.1|CAG58453.1|ZCF6		CAL0128537		YLR014C	YLR014C	Anc_5.235	YLR014C	PPR1	Zinc finger transcription factor; contains a Zn(2)-Cys(6) binuclear cluster domain, positively regulates transcription of URA1, URA3, URA4, and URA10, which are involved in de novo pyrimidine biosynthesis, in response to pyrimidine starvation; activity may be modulated by interaction with Tup1p				186	357	212	187	211.766	288.988		250.377	1.50816	0.448541		0
CAGL0M12859g		2826	221545	ChrM	1269741	1272566	W	CAGL-IPF8491|CAGL-CDS0533.1|CAG62882.1		CAL0136353	RPN2	YIL075C	YIL075C	Anc_7.274	YIL075C	RPN2	Subunit of the 26S proteasome; substrate of the N-acetyltransferase Nat1p; protein abundance increases in response to DNA replication stress				368	507	280	319	340.54	441.274		390.907	1.50297	0.373852
CAGL0M02145g		1002	-791374	ChrM	257734	258735	W	CAGL-IPF6387|CAGL-CDS3301.1|CAG62415.1		CAL0136901	TGS1	YPL157W	YPL157W	Anc_8.680	YPL157W	TGS1	Trimethyl guanosine synthase, conserved nucleolar methyl transferase; converts the m(7)G cap structure of snRNAs, snoRNAs, and telomerase TLC1 RNA to m(2,2,7)G; also required for nucleolar assembly and splicing of meiotic pre-mRNAs; interacts with Swm2p, which may confer substrate specificity on Tgs1p				1	19	0	3	1.5	12.2565		6.87825	1.49975	3.03051
CAGL0C03982g		1890	-29298	ChrC	393798	391909	C	CAGL-IPF920|CAGL-CDS1356.1|CAG58255.1		CAL0127434							#N/A				72	151	83	93	83.1065	130.952		107.029	1.49635	0.655999
CAGL0M02783g		690	-734318	ChrM	315635	314946	C	CAGL-IPF6587|CAGL-CDS4178.1|CAG62444.1		CAL0137087		YPL127C	YPL127C	Anc_8.629	YPL127C	HHO1	Histone H1, linker histone with roles in meiosis and sporulation; decreasing levels early in sporulation may promote meiosis, and increasing levels during sporulation facilitate compaction of spore chromatin; binds to promoters and within genes in mature spores; may be recruited by Ume6p to promoter regions, contributing to transcriptional repression outside of meiosis; suppresses DNA repair invo…				381	544	365	394	394.257	503.687		448.972	1.49615	0.353389
CAGL0E01001g		2091	-153543	ChrE	91396	93486	W	CAGL-IPF5537|CAGL-CDS1103.1|CAG58650.1		CAL0128562	SEC1	YDR164C	YDR164C	Anc_8.351	YDR164C	SEC1	Sm-like protein involved in docking and fusion of exocytic vesicles; binds to assembled SNARE complexes at the membrane and stimulates membrane fusion; localization to sites of secretion (bud neck and bud tip) is dependent on SNARE function; interacts directly with essential exocyst subunit Sec6p				73	127	76	106	79.718	126.563		103.141	1.49381	0.666878
CAGL0G05335g	TPS2	2673	441832	ChrG	501279	503951	W	CAGL-IPF3522|CAG59519.1		CAL0129888	TPS2	YDR074W	YDR074W	Anc_8.195	YDR074W	TPS2	Phosphatase subunit of the trehalose-6-P synthase/phosphatase complex; involved in synthesis of the storage carbohydrate trehalose; expression is induced by stress conditions and repressed by the Ras-cAMP pathway; protein abundance increases in response to DNA replication stress				92	171	120	141	113.66	169.055		141.358	1.49274	0.572772
CAGL0G00814g	CHS5	1749	12542	ChrG	72451	74199	W	CAGL-IPF3903|CAGL-CDS1603.1|CAG59324.1		CAL0129391	CHS5	YLR330W	YLR330W	Anc_4.156	YLR330W	CHS5	Component of the exomer complex; exomer also contains Csh6p, Bch1p, Bch2p, and Bud7p and is involved in export of selected proteins, such as chitin synthase Chs3p, from the Golgi to the plasma membrane				435	535	474	575	481.807	605.163		543.485	1.49077	0.328867		0
CAGL0L13332g	EPA13	3108	450398	ChrL	1436026	1439133	W	CAGL-IPF9478|CAG62323.1		CAL0135362							#N/A				987	1109	986	1183	1042.22	1248.15		1145.18	1.48693	0.260123
CAGL0K10692g		1518	783281	ChrK	1040242	1041759	W	CAGL-IPF3234|CAGL-CDS2044.1|CAG61644.1		CAL0134033	ATG18	YFR021W	YFR021W	Anc_1.359	YFR021W	ATG18	Phosphoinositide binding protein; required for vesicle formation in autophagy and the cytoplasm-to-vacuole targeting (Cvt) pathway; binds both phosphatidylinositol (3,5)-bisphosphate and phosphatidylinositol 3-phosphate; WD-40 repeat protein; relocalizes from vacuole to cytoplasm upon DNA replication stress; has 4 mammalian homologs WIPI1, WIPI2, WIPI3 and WIPI4/WDR45; mutations in human WDR45 ca…				193	322	168	172	190.824	262.706		226.765	1.4867	0.461207
CAGL0M05489g		1281	-463577	ChrM	585392	586672	W	CAGL-IPF7173|CAGL-CDS2598.1|CAG62561.1		CAL0137385		YBR205W	YBR205W	Anc_8.523	YBR205W	KTR3	Putative alpha-1,2-mannosyltransferase; involved in O- and N-linked protein glycosylation; member of the KRE2/MNT1 mannosyltransferase family; Svp26p mediates uptake of Ktr3p into COPII vesicles; relocalizes from nucleus to vacuole upon DNA replication stress				177	231	196	265	198.378	271.658		235.018	1.48455	0.453537		0
CAGL0I04554g	GRX7	720	-384669	ChrI	407751	408470	W	CAGL-IPF5904|CAGL-CDS4200.1|CAG60384.1		CAL0132160	GRX7	YDL010W	YBR014C	Anc_3.189	YBR014C	GRX7	Cis-golgi localized monothiol glutaredoxin; more similar in activity to dithiol than other monothiol glutaredoxins; involved in the oxidative stress response; does not bind metal ions; GRX7 has a paralog, GRX6, that arose from the whole genome duplication				546	641	471	590	535.64	666.945		601.293	1.48443	0.316303
CAGL0I05786g		2043	-243777	ChrI	550024	547982	C	CAGL-IPF1373|CAGL-CDS1153.1|CAG60438.1		CAL0129735	LRO1	YNR008W	YNR008W	Anc_6.298	YNR008W	LRO1	Acyltransferase that catalyzes diacylglycerol esterification; one of several acyltransferases that contribute to triglyceride synthesis; Lro1p and Dga1p can O-acylate ceramides; putative homolog of human lecithin cholesterol acyltransferase				591	762	523	588	587.026	726.274		656.65	1.48418	0.307088
CAGL0K09130g		816	649838	ChrK	907965	907150	C	CAGL-IPF3057|CAGL-CDS3822.1|CAG61581.1		CAL0133863	SRL1	YPL163C	YOR247W	Anc_8.687	YOR247W	SRL1	Mannoprotein that exhibits a tight association with the cell wall; required for cell wall stability in the absence of GPI-anchored mannoproteins; has a high serine-threonine content; expression is induced in cell wall mutants; SRL1 has a paralog, SVS1, that arose from the whole genome duplication				263	316	174	255	229.157	308.303		268.73	1.48234	0.42801
CAGL0H06875g	ARG81	2109	-271491	ChrH	684626	682518	C	CAGL-IPF268|CAGL-CDS1089.1|CAG60028.1|ZCF23		CAL0131844	ARG81	YML099C	YML099C	Anc_8.879	YML099C	ARG81	Zinc finger transcription factor involved in arginine-responsive genes; Zn(2)-Cys(6) binuclear cluster domain type; involved in the regulation of arginine-responsive genes; acts with Arg80p and Arg82p				53	79	48	90	54.164	93.195		73.6795	1.4809	0.782918		0
CAGL0H09966g		552	18238	ChrH	973025	973576	W	CAGL-IPF36|CAGL-CDS4577.1|CAG60163.1		CAL0129585	FMP23	YBR047W	YBR047W	Anc_3.254	YBR047W	FMP23	Putative protein of unknown function; proposed to be involved in iron or copper homeostasis; the authentic, non-tagged protein is detected in highly purified mitochondria in high-throughput studies				780	1042	796	831	833.178	1008.55		920.864	1.48044	0.275587
CAGL0D06226g		2331	32972	ChrD	588725	586395	C	CAGL-IPF8561|CAGL-CDS0869.1|CAG58588.1		CAL0128157				Anc_4.060			#N/A				4804	5742	4236	4361	4756.1	5425.37		5090.73	1.47709	0.189942
CAGL0I00352g		504	-765628	ChrI	26900	27403	W	CAGL-IPF1998|CAGL-CDS4679.1|CAG60205.1		CAL0130017	RAD6	YGL058W	YGL058W	Anc_6.109	YGL058W	RAD6	Ubiquitin-conjugating enzyme (E2); involved in postreplication repair as a heterodimer with Rad18p, DSBR and checkpoint control as a heterodimer with Bre1p, ubiquitin-mediated N-end rule protein degradation as a heterodimer with Ubr1p, as well as endoplasmic reticulum-associated protein degradation (ERAD) with Ubr1p in the absence of canonical ER membrane ligases				40	111	87	96	69.3285	112.708		91.0182	1.476	0.701069
CAGL0C04169g		2079	-13848	ChrC	407265	409343	W	CAGL-IPF909|CAGL-CDS1121.1|CAG58263.1		CAL0127470	DSF2	YBR007C	YBR007C	Anc_3.196	YBR007C	DSF2	Deletion suppressor of mpt5 mutation; relocalizes from bud neck to cytoplasm upon DNA replication stress				1708	2233	1815	1807	1863.23	2175.5		2019.37	1.46996	0.223538
CAGL0K08800g	ADI1	528	626418	ChrK	883874	884401	W	CAGL-IPF3078|CAGL-CDS4634.1|CAG61566.1		CAL0134151	ADI1	YMR009W	YMR009W	Anc_7.113	YMR009W	ADI1	Acireductone dioxygenease involved in the methionine salvage pathway; ortholog of human MTCBP-1; transcribed as polycistronic mRNA with YMR010W and regulated post-transcriptionally by RNase III (Rnt1p) cleavage; ADI1 mRNA is induced in heat shock conditions				70	108	55	92	66.5525	108.866		87.7092	1.46728	0.709989
CAGL0D02310g		2130	-316439	ChrD	239213	237084	C	CAGL-IPF4850|CAGL-CDS1062.1|CAG58426.1		CAL0128399	MSC6	YOR354C	YOR354C	Anc_7.037	YOR354C	MSC6	Protein of unknown function; mutant is defective in directing meiotic recombination events to homologous chromatids; the authentic, non-tagged protein is detected in highly purified mitochondria in high-throughput studies				291	427	225	244	271.488	357.362		314.425	1.46407	0.3965
CAGL0H10252g		930	47965	ChrH	1003492	1002563	C	CAGL-IPF14|CAGL-CDS3522.1|CAG60176.1		CAL0131666	TRM7	YBR061C	YBR061C	Anc_3.277	YBR061C	TRM7	2'-O-ribose methyltransferase; methylates the 2'-O-ribose of tRNA-Phe, tRNA-Trp, and tRNA-Leu at positions C32 and N34 of the tRNA anticodon loop; crucial biological role likely modification of tRNA-Phe; interacts with Trm732p and Rtt10p in 2'-O-methylation of C32 and N34 substrate tRNAs, respectively				112	164	63	99	91.9965	140.964		116.48	1.46335	0.615681
CAGL0H00121g		2875	-949397	ChrH	7103	4229	C	CAGL0H00132g.1		CAL0000203694							#N/A				585	708	527	629	586.248	723.279		654.764	1.46323	0.303041
CAGL0M03685g		1482	-635535	ChrM	414814	413333	C	CAGL-IPF6795|CAGL-CDS2109.1|CAG62482.1		CAL0137085	MRX6	YNL295W	YNL295W	Anc_3.062	YNL295W		Putative protein of unknown function				0	9	0	8	1	10.184		5.592	1.46265	3.34823
CAGL0K00803g	TRX2	312	-170839	ChrK	86725	87036	W	CAGL-IPF5147|CAGL-CDS5517.1|CAG61220.1|TRX1		CAL0134177	TRX1	YLR043C	YGR209C	Anc_5.124	YGR209C	TRX2	Cytoplasmic thioredoxin isoenzyme; part of thioredoxin system which protects cells against oxidative and reductive stress; forms LMA1 complex with Pbi2p; acts as a cofactor for Tsa1p; required for ER-Golgi transport and vacuole inheritance; with Trx1p, facilitates mitochondrial import of small Tims Tim9p, Tim10p, Tim13p by maintaining them in reduced form; abundance increases under DNA replicatio…				118	200	106	125	118.883	174.188		146.535	1.46061	0.551099
CAGL0M02453g		363	-761696	ChrM	287732	288094	W	CAGL-IPF6610|CAGL-CDS5176.1|CAG62429.1		CAL0137149	POC4	YPL144W	YPL144W	Anc_8.656	YPL144W	POC4	Component of a heterodimeric Poc4p-Irc25p chaperone; involved in assembly of alpha subunits into the 20S proteasome; may regulate formation of proteasome isoforms with alternative subunits under different conditions				38	106	64	69	55.552	94.3995		74.9758	1.4599	0.76494
CAGL0H02651g		4635	-714251	ChrH	238495	243129	W	CAGL-IPF8750|CAGL-CDS0093.1|CAG59843.1		CAL0131736	RKR1	YMR247C	YMR247C	Anc_8.799	YMR247C	RKR1	RING domain E3 ubiquitin ligase; involved in ubiquitin-mediated degradation of non-stop proteins; component of the ribosome quality control (RQC) complex (Rqc1p-Rkr1p-Tae2p-Cdc48p-Npl4p-Ufd1p), a ribosome-bound complex required for degradation of polypeptides arising from stalled translation; functional connections to chromatin modification; nuclear protein that also co-localizes with ribosomes; …				399	545	269	300	349.929	449.15		399.54	1.45986	0.360133
CAGL0K09394g		666	672676	ChrK	930728	930063	C	CAGL-IPF8792|CAGL-CDS4246.1|CAG61591.1		CAL0134743	YPT32	YGL210W	YGL210W	Anc_3.521	YGL210W	YPT32	Rab family GTPase involved in the exocytic pathway; mediates intra-Golgi traffic or the budding of post-Golgi vesicles from the trans-Golgi; protein abundance increases in response to DNA replication stress; YPT32 has a paralog, YPT31, that arose from the whole genome duplication	dup			83	154	88	106	91.384	140.063		115.724	1.45965	0.616062
CAGL0H10560g		435	74275	ChrH	1029121	1029555	W	CAGL-IPF8819|CAGL-CDS4895.1|CAG60190.1		CAL0131834	YDL121C	YDL121C	YDL121C	Anc_2.308	YDL121C		Putative protein of unknown function; green fluorescent protein (GFP)-fusion protein localizes to the endoplasmic reticulum; YDL121C is not an essential protein				288	389	169	210	238.88	318.455		278.667	1.45834	0.414806
CAGL0M06127g		693	-409206	ChrM	640057	640749	W	CAGL-IPF6128|CAGL-CDS4168.1|CAG62589.1		CAL0137495	SEC66	YBR171W	YBR171W	Anc_8.588	YBR171W	SEC66	Non-essential subunit of Sec63 complex; with Sec61 complex, Kar2p/BiP and Lhs1p forms a channel competent for SRP-dependent and post-translational SRP-independent protein targeting and import into the ER; other members are Sec63p, Sec62p, and Sec72p				6	32	16	30	12.888	34.565		23.7265	1.45528	1.42328
CAGL0I09878g		2091	152031	ChrI	943766	945856	W	CAGL-IPF7708|CAGL-CDS1105.1|CAG60614.1		CAL0132268	FAA1		YOR317W	Anc_8.796	YOR317W	FAA1	Long chain fatty acyl-CoA synthetase; activates imported fatty acids with a preference for C12:0-C16:0 chain lengths; functions in long chain fatty acid import; accounts for most acyl-CoA synthetase activity; localized to lipid particles; involved in sphingolipid-to-glycerolipid metabolism; forms ER foci upon DNA replication stress; FAA1 has a paralog, FAA4, that arose from the whole genome dupli…	dup			1322	1531	1096	1257	1270.83	1502.47		1386.65	1.45267	0.241571
CAGL0I00880g		2211	-727275	ChrI	64400	66610	W	CAGL-IPF2030|CAGL-CDS0975.1|CAG60229.1		CAL0132328	PSO2	YMR137C	YMR137C	Anc_2.394	YMR137C	PSO2	Nuclease required for DNA single- and double-strand break repair; acts at a post-incision step in repair of breaks that result from interstrand cross-links produced by a variety of mono- and bi-functional psoralen derivatives; induced by UV-irradiation; forms nuclear foci upon DNA replication stress				652	870	577	609	647.524	792.57		720.047	1.45218	0.291605
CAGL0J09284g		666	699313	ChrJ	916357	917022	W	CAGL-IPF6960|CAGL-CDS4244.1|CAG61064.1		CAL0133212	YDL129W	YDL129W	YDL129W	Anc_7.292	YDL129W		Protein of unknown function; green fluorescent protein (GFP)-fusion protein localizes to the cytoplasm and the nucleus; YDL129W is not an essential gene; relative distribution to the nucleus increases upon DNA replication stress				725	873	648	755	723.464	879.553		801.508	1.45178	0.281848
CAGL0E03355g		4608	63799	ChrE	312086	307479	C	CAGL-IPF2435|CAGL-CDS0095.1|CAG58753.1		CAL0128650		YLL015W	YLL015W	Anc_4.052	YLL015W	BPT1	ABC type transmembrane transporter of MRP/CFTR family; found in vacuolar membrane, involved in the transport of unconjugated bilirubin and in heavy metal detoxification via glutathione conjugates, along with Ycf1p				760	953	621	691	725.966	882.081		804.023	1.44886	0.281009		0
CAGL0K10406g		1062	760840	ChrK	1018029	1019090	W	CAGL-IPF3220|CAGL-CDS3129.1|CAG61635.1		CAL0133921	YFR018C	YFR018C	YFR018C	Anc_1.361	YFR018C		Putative protein of unknown function				228	301	206	265	229.433	306.658		268.045	1.44806	0.418555
CAGL0A00605g		1923	-9064	ChrA	69203	67281	C	CAGL-IPF3343|CAGL-CDS1310.1|CAG57690.1		CAL0126837	CDH1	YGL003C	YGL003C	Anc_4.122	YGL003C	CDH1	Activator of anaphase-promoting complex/cyclosome (APC/C); cell-cycle regulated; directs ubiquitination of cyclins resulting in mitotic exit; targets the APC/C to specific substrates including Cdc20p, Ase1p, Cin8p and Fin1p				81	122	132	182	114.826	168.561		141.694	1.44496	0.553821
CAGL0G08602g		2793	748968	ChrG	808355	811147	W	CAGL-IPF1621|CAGL-CDS0553.1|CAG59663.1		CAL0137621	RPI1	YIL119C	YIL119C	Anc_2.244	YIL119C	RPI1	Transcription factor, allelic differences between S288C and Sigma1278b; mediates fermentation stress tolerance by modulating cell wall integrity; overexpression suppresses heat shock sensitivity of wild-type RAS2 overexpression and also suppresses cell lysis defect of mpk1 mutation; allele from S288c can confer fMAPK pathway independent transcription of FLO11; S288C and Sigma1278b alleles differ …				459	578	394	467	449.367	563.428		506.398	1.44299	0.326338
CAGL0E02915g		1497	32018	ChrE	277254	278750	W	CAGL-IPF9200|CAGL-CDS2086.1|CAG58735.1		CAL0129052			YGL028C	Anc_4.089	YGL028C	SCW11	Cell wall protein with similarity to glucanases; may play a role in conjugation during mating based on its regulation by Ste12p	dup			451	567	379	452	437.034	549.146		493.09	1.44295	0.329443		0
CAGL0A02970g		930	230262	ChrA	308032	307103	C	CAGL-IPF1272|CAGL-CDS3520.1|CAG57788.1		CAL0126965	PHO92	YDR374C	YDR374C	Anc_5.446	YDR374C	PHO92	Posttranscriptional regulator of phosphate metabolism; regulates PHO4 mRNA stability by binding to PHO4's 3'UTR in phosphate-dependent manner; contains YTH (YT521-B Homology) domain and is a homolog of human YTHDF2				260	420	281	279	287.096	374.355		330.725	1.44251	0.382874
CAGL0F01639g		795	-61098	ChrF	165544	164750	C	CAGL-IPF5761|CAGL-CDS3883.1|CAG58967.1		CAL0130896	PER33	YLR064W	YLR064W	Anc_8.026	YLR064W	PER33	Protein that localizes to the endoplasmic reticulum; also associates with the nuclear pore complex; deletion extends chronological lifespan; highly conserved across species, orthologous to human TMEM33 and paralogous to Pom33p; protein abundance increases in response to DNA replication stress				809	1001	639	716	760.465	920.718		840.591	1.44196	0.275878
CAGL0L04224g		504	-493089	ChrL	493841	494344	W	CAGL-IPF8112|CAGL-CDS4684.1|CAG61928.1		CAL0136114	MRPL23	YOR150W	YOR150W	Anc_5.496	YOR150W	MRPL23	Mitochondrial ribosomal protein of the large subunit				144	246	199	218	183.544	251.639		217.592	1.44148	0.455226
CAGL0J10208g		924	782450	ChrJ	1000288	999365	C	CAGL-IPF2810|CAGL-CDS3543.1|CAG61106.1		CAL0132830	RNH201	YNL072W	YNL072W	Anc_2.224	YNL072W	RNH201	Ribonuclease H2 catalytic subunit; removes RNA primers during Okazaki fragment synthesis and errant ribonucleotides misincorporated during DNA replication; homolog of RNAse HI; related to human AGS4 which causes Aicardi-Goutieres syndrome				240	296	192	265	227.656	304.158		265.907	1.4412	0.417963
CAGL0G01056g	GAS3	1629	39692	ChrG	99661	101289	W	CAGL-IPF3881|CAGL-CDS1823.1|CAG59334.1		CAL0130552	GAS2	YLR343W	YLR343W	Anc_4.174	YLR343W	GAS2	1,3-beta-glucanosyltransferase; involved with Gas4p in spore wall assembly; has similarity to Gas1p				1449	1823	1265	1308	1428.21	1678.33		1553.27	1.44039	0.232824		0
CAGL0F07315g		972	487491	ChrF	714221	713250	C	CAGL-IPF524|CAGL-CDS3385.1|CAG59209.1		CAL0131404	SNF4		YGL115W	Anc_6.136	YGL115W	SNF4	Activating gamma subunit of the AMP-activated Snf1p kinase complex; additional subunits of the complex are Snf1p and a Sip1p/Sip2p/Gal83p family member; activates glucose-repressed genes, represses glucose-induced genes; role in sporulation, and peroxisome biogenesis; protein abundance increases in response to DNA replication stress	dup			323	401	273	349	314.151	405.84		359.995	1.43899	0.369449		0
CAGL0I05632g	PHO91	2661	-260142	ChrI	531308	533968	W	CAGL-IPF1360|CAGL-CDS0625.1|CAG60431.1		CAL0132426	PHO91	YNR013C	YNR013C	Anc_6.308	YNR013C	PHO91	Low-affinity vacuolar phosphate transporter; exports phosphate from the vacuolar lumen to the cytosol; regulates phosphate and polyphosphate metabolism; acts upstream of Pho81p in regulation of the PHO pathway; deletion of pho84, pho87, pho89, pho90, and pho91 causes synthetic lethality; transcription independent of Pi and Pho4p activity; overexpression results in vigorous growth				1316	1516	1001	1158	1215.06	1437.01		1326.03	1.43885	0.242047
CAGL0H03751g		3066	-609426	ChrH	347169	344104	C	CAGL-IPF1906|CAGL-CDS0415.1|CAG59890.1		CAL0130030			YLR176C	Anc_1.400	YLR176C	RFX1	Major transcriptional repressor of DNA-damage-regulated genes; recruits repressors Tup1p and Cyc8p to their promoters; involved in DNA damage and replication checkpoint pathway; similar to a family of mammalian DNA binding RFX1-4 proteins	dup			1389	1645	1384	1529	1464.31	1718.73		1591.52	1.43834	0.23112		0
CAGL0G00242g	YOR1	4434	-38138	ChrG	24861	20428	C	CAGL-IPF8922|CAGL-CDS0113.1|CAG59302.1		CAL0130663	YOR1	YGR281W	YGR281W	Anc_5.010	YGR281W	YOR1	Plasma membrane ATP-binding cassette (ABC) transporter; multidrug transporter mediates export of many different organic anions including oligomycin; homolog of human cystic fibrosis transmembrane receptor (CFTR)				2369	2657	2084	2354	2343.16	2707.77		2525.46	1.43817	0.208647		0
CAGL0A01023g		1236	26105	ChrA	102793	104028	W	CAGL-IPF3366|CAGL-CDS2688.1|CAG57706.1		CAL0126619	NMA1	YLR328W	YLR328W	Anc_4.147	YLR328W	NMA1	Nicotinic acid mononucleotide adenylyltransferase; catalyzes the transfer of the adenylyl moiety of ATP to nicotinamide mononucleotide to form NAD; involved in pathways of NAD biosynthesis, including the de novo, NAD(+) salvage, and nicotinamide riboside salvage pathways; homolog of human NMNAT; NMA1 has a paralog, NMA2, that arose from the whole genome duplication				18	31	18	49	19.999	45.1895		32.5943	1.43727	1.17606
CAGL0M07590g		1371	-289984	ChrM	758940	760310	W	CAGL-IPF9608|CAGL-CDS2347.1|CAG62654.1		CAL0137417	MAC1	YMR021C	YMR021C	Anc_2.568	YMR021C	MAC1	Copper-sensing transcription factor; involved in regulation of genes required for high affinity copper transport				299	286	113	244	213.272	286.862		250.067	1.43721	0.427666
CAGL0G00220g		927	-41522	ChrG	18798	19724	W	CAGL-IPF8919|CAGL-CDS3539.1|CAG59301.1		CAL0129730	BGL2	YGR282C	YGR282C	Anc_5.008	YGR282C	BGL2	Endo-beta-1,3-glucanase; major protein of the cell wall, involved in cell wall maintenance				1545	1870	1452	1559	1580.09	1848.79		1714.44	1.4354	0.226582
CAGL0L05016g		2415	-417089	ChrL	571300	568886	C	CAGL-IPF4578|CAGL-CDS0802.1|CAG61962.1		CAL0135206	STB6	YMR053C	YKL072W	Anc_2.616	YKL072W	STB6	Protein that binds Sin3p in a two-hybrid assay; STB6 has a paralog, STB2, that arose from the whole genome duplication	dup			632	800	588	658	643.634	786.259		714.947	1.43476	0.288764
CAGL0K01089g		633	-149052	ChrK	108352	108984	W	CAGL-IPF5125|CAGL-CDS4359.1|CAG61233.1		CAL0134683	SLX9	YGR081C	YGR081C	Anc_3.409	YGR081C	SLX9	Protein required for pre-rRNA processing; associated with the 90S pre-ribosome and 43S small ribosomal subunit precursor; interacts with U3 snoRNA; deletion mutant has synthetic fitness defect with an sgs1 deletion mutant				142	202	103	143	129.216	185.726		157.471	1.43419	0.523389
CAGL0C05115g	ARG1	1263	63376	ChrC	486159	484897	C	CAGL-IPF4103|CAGL-CDS2634.1|CAG58302.1		CAL0127578	ARG1	YOL058W	YOL058W	Anc_3.170	YOL058W	ARG1	Arginosuccinate synthetase; catalyzes the formation of L-argininosuccinate from citrulline and L-aspartate in the arginine biosynthesis pathway; potential Cdc28p substrate				941	1122	860	978	949.23	1134.62		1041.92	1.43298	0.257378
CAGL0J08162g		1794	587199	ChrJ	805472	803679	C	CAGL-IPF6738|CAGL-CDS1525.1|CAG61014.1		CAL0132774	LYP1	YNL268W	YNL268W	Anc_1.084	YNL268W	LYP1	Lysine permease; one of three amino acid permeases (Alp1p, Can1p, Lyp1p) responsible for uptake of cationic amino acids				238	302	160	221	208.88	281.395		245.138	1.43271	0.429925
CAGL0L02871g		2139	-648317	ChrL	339934	337796	C	CAGL-IPF2758|CAGL-CDS1051.1|CAG61866.1		CAL0135872	NOC2	YOR206W	YOR206W	Anc_8.617	YOR206W	NOC2	Protein that forms a nucleolar complex with Mak21p; binds to 90S and 66S pre-ribosomes, as well as a nuclear complex with Noc3p that binds to 66S pre-ribosomes; both complexes mediate intranuclear transport of ribosomal precursors				145	226	133	160	147.382	207.68		177.531	1.43198	0.494807
CAGL0M09152g		2455	-130059	ChrM	920777	918323	C	CAGL-IPF8190|CAGL-CDS4129.1|CAGL-IPF8192|CAGL-CDS1442.1|CAGL0M09163g		CAL0136369		YJR089w	YJR089w	Anc_7.460	YJR089w	BIR1					46	85	50	77	51.775	88.5835		70.1792	1.42924	0.774782
CAGL0H08195g		1752	-149769	ChrH	806169	804418	C	CAGL-IPF171|CAGL-CDS1594.1|CAG60088.1		CAL0131458	STI1	YOR027W	YOR027W	Anc_5.617	YOR027W	STI1	Hsp90 cochaperone; interacts with the Ssa group of the cytosolic Hsp70 chaperones and activates Ssa1p ATPase activity; interacts with Hsp90 chaperones and inhibits their ATPase activity; homolog of mammalian Hop				6821	8329	6462	6382	7001.14	7902.16		7451.65	1.42856	0.174657
CAGL0J00517g		2118	-172062	ChrJ	44256	46373	W	CAGL-IPF7794|CAGL-CDS1078.1|CAG60681.1		CAL0133398	RRM3	YHR031C	YHR031C	Anc_5.275	YHR031C	RRM3	DNA helicase involved in rDNA replication and Ty1 transposition; relieves replication fork pauses at telomeric regions; structurally and functionally related to Pif1p				259	334	205	265	244.377	323.158		283.768	1.42788	0.403126
CAGL0J09152g		603	688029	ChrJ	905707	905105	C	CAGL-IPF6967|CAGL-CDS4447.1|CAG61058.1		CAL0133734	RDI1	YDL135C	YDL135C	Anc_7.303	YDL135C	RDI1	Rho GDP dissociation inhibitor; involved in the localization and regulation of Cdc42p and Rho1p; protein abundance increases in response to DNA replication stress				62	89	49	90	59.2195	98.195		78.7072	1.42738	0.729577
CAGL0D03212g		1098	-221111	ChrD	334025	332928	C	CAGL-IPF4768|CAGL-CDS3026.1|CAG58467.1		CAL0127975	POM34	YLR018C	YLR018C	Anc_5.203	YLR018C	POM34	Subunit of the transmembrane ring of the nuclear pore complex (NPC); contributes to nucleocytoplasmic transport, NPC biogenesis and spindle pole body duplication				248	416	232	214	253.876	334.297		294.087	1.42688	0.397006
CAGL0K03641g		1794	79850	ChrK	336673	338466	W	CAGL-IPF2172|CAGL-CDS1519.1|CAG61344.1		CAL0134193	ASI1	YNL008C	YNL008C	Anc_2.419	YNL008C	ASI3	Putative integral membrane E3 ubiquitin ligase; acts with Asi1p and Asi2p to ensure the fidelity of SPS-sensor signalling by maintaining the dormant repressed state of gene expression in the absence of inducing signals; ASI3 has a paralog, ASI1, that arose from the whole genome duplication	dup			2812	3340	2440	2568	2762.42	3174.56		2968.49	1.42687	0.200626
CAGL0G02409g	SRP40	1116	154612	ChrG	215952	214837	C	CAGL-IPF3560|CAGL-CDS2973.1|CAG59394.1		CAL0130749	SRP40	YKR092C	YKR092C	Anc_5.694	YKR092C	SRP40	Nucleolar serine-rich protein; role in preribosome assembly or transport; may function as a chaperone of small nucleolar ribonucleoprotein particles (snoRNPs); immunologically and structurally to rat Nopp140				23	71	19	22	23.0545	49.381		36.2177	1.42359	1.09891
CAGL0E04906g		1086	230137	ChrE	476663	475578	C	CAGL-IPF4992|CAGL-CDS3069.1|CAG58820.1		CAL0129132	AHA1	YDR214W	YDR214W	Anc_8.424	YDR214W	AHA1	Co-chaperone that binds Hsp82p and activates its ATPase activity; plays a role in determining prion variants; similar to Hch1p; expression is regulated by stresses such as heat shock; protein abundance increases in response to DNA replication stress				5103	6064	5311	5463	5502.76	6231.59		5867.17	1.42355	0.179444
CAGL0D02706g		2304	-268494	ChrD	284942	287245	W	CAGL-IPF8632|CAGL-CDS0896.1|CAG58444.1		CAL0128053	RIX1	YHR197W	YHR197W	Anc_4.365	YHR197W	RIX1	Component of the Rix1 complex and possibly pre-replicative complexes; required for processing of ITS2 sequences from 35S pre-rRNA; component of the pre-60S ribosomal particle with the dynein-related AAA-type ATPase Mdn1p; required for pre-replicative complex (pre-RC) formation and maintenance during DNA replication licensing; relocalizes to the cytosol in response to hypoxia; essential gene				2	17	8	23	6.444	22.9665		14.7052	1.42337	1.8335
CAGL0C02101g		594	-207143	ChrC	215305	214712	C	CAGL-IPF1082|CAGL-CDS4466.1|CAG58173.1		CAL0127440	KEG1	YFR042W	YFR042W	Anc_3.549	YFR042W	KEG1	Integral membrane protein of the ER; physically interacts with Kre6p; has a role in the synthesis of beta-1,6-glucan in the cell wall; required for cell viability				62	100	52	84	60.886	100.182		80.534	1.4221	0.718441
CAGL0M11198g		1386	53851	ChrM	1102767	1104152	W	CAGL-IPF8834|CAGL-CDS2313.1|CAG62807.1		CAL0136817	UBP8	YMR223W	YMR223W	Anc_8.742	YMR223W	UBP8	Ubiquitin-specific protease component of the SAGA acetylation complex; required for SAGA (Spt-Ada-Gcn5-Acetyltransferase)-mediated deubiquitination of histone H2B				6	33	12	22	10.666	30.381		20.5235	1.42153	1.51015
CAGL0J01980g		3159	-18986	ChrJ	196812	199970	W	CAGL-IPF6471|CAGL-CDS0375.1|CAG60740.1		CAL0133376	MPH1	YIR002C	YIR002C	Anc_7.153	YIR002C	MPH1	3'-5' DNA helicase involved in error-free bypass of DNA lesions; binds flap DNA in error-free bypass pathway, stimulates activity of Rad27p and Dna2p; prevents crossovers between ectopic sequences by removing substrates for Mus81-Mms4 or Rad1-Rad10 cleavage; similar to FANCM human Fanconi anemia complementation group protein that with MHF complex is involved in stabilizing and remodeling blocked …				1624	1863	1468	1653	1628.47	1900.33		1764.4	1.42053	0.22273
CAGL0G05632g		771	476674	ChrG	537072	537842	W	CAGL-IPF3499|CAGL-CDS3955.1|CAG59533.1		CAL0130596	YDL218W	YDL218W	YDL218W	Anc_2.061	YDL218W		Putative protein of unknown function; YDL218W transcription is regulated by Azf1p and induced by starvation and aerobic conditions; expression also induced in cells treated with the mycotoxin patulin				245	348	238	275	255.709	336.013		295.861	1.41958	0.394012
CAGL0I02178g		384	-604299	ChrI	188289	188672	W	CAGL-IPF8094|CAGL-CDS5087.1|CAG60283.1		CAL0132210	MPC2	YHR162W	YHR162W	Anc_5.083	YHR162W	MPC2	Highly conserved subunit of the mitochondrial pyruvate carrier; a mitochondrial inner membrane complex comprised of Fmp37p/Mpc1p and either Mpc2p or Fmp43p/Mpc3p mediates mitochondrial pyruvate uptake; more highly expressed in glucose-containing minimal medium than in lactate-containing medium; MPC2 has a paralog, FMP43, that arose from the whole genome duplication	dup			11	38	4	12	8.722	27.026		17.874	1.41851	1.63162
CAGL0F05599g		1833	336933	ChrF	562262	564094	W	CAGL-IPF400|CAGL-CDS1451.1|CAG59138.1		CAL0131012	NUP42	YDR192C	YDR192C	Anc_8.398	YDR192C	NUP42	FG-nucleoporin component of central core of the nuclear pore complex; also part of the nuclear pore complex (NPC) cytoplasmic filaments; contributes directly to nucleocytoplasmic transport and maintenance of the NPC permeability barrier and is involved in gene tethering at the nuclear periphery; interacts with Gle1p				1460	1701	1145	1287	1367.05	1605.04		1486.04	1.41691	0.231545
CAGL0L06666g	YHB1	1197	-232251	ChrL	754333	755529	W	CAGL-IPF7647|CAGL-CDS2779.1|CAG62036.1		CAL0135000	YHB1	YGR234W	YGR234W	Anc_5.093	YGR234W	YHB1	Nitric oxide oxidoreductase; flavohemoglobin involved in nitric oxide detoxification; plays a role in the oxidative and nitrosative stress responses; protein increases in abundance and relocalizes from nucleus to cytoplasmic foci upon DNA replication stress				1372	1736	1385	1428	1456.37	1705.09		1580.73	1.41334	0.227477
CAGL0K08536g	APE1	1542	603780	ChrK	860729	862270	W	CAGL-IPF3101|CAGL-CDS2014.1|CAG61555.1		CAL0134599	APE1	YKL103C	YKL103C	Anc_2.478	YKL103C	APE1	Vacuolar aminopeptidase yscI; zinc metalloproteinase that belongs to the peptidase family M18; often used as a marker protein in studies of autophagy and cytosol to vacuole targeting (CVT) pathway; protein increases in abundance and relative distribution to cytoplasmic foci increases upon DNA replication stress				809	1145	915	885	913.783	1091.67		1002.73	1.41315	0.256611
CAGL0E02805g		2523	20651	ChrE	267896	265374	C	CAGL-IPF7991|CAGL-CDS0710.1|CAG58730.1		CAL0129108	HIR1	YBL008W	YBL008W	Anc_4.106	YBL008W	HIR1	Subunit of the HIR complex; HIR is a nucleosome assembly complex involved in regulation of histone gene transcription; contributes to nucleosome formation, heterochromatic gene silencing, and formation of functional kinetochores				267	436	263	249	280.596	364.789		322.693	1.41242	0.378567		0
CAGL0A01474g		1779	76738	ChrA	153155	154933	W	CAGL-IPF3032|CAGL-CDS1541.1|CAG57724.1		CAL0126657	SCW11	YGL028C	YGL028C	Anc_4.089	YGL028C	SCW11	Cell wall protein with similarity to glucanases; may play a role in conjugation during mating based on its regulation by Ste12p	dup			248	367	256	281	267.208	349.025		308.117	1.41143	0.385369
CAGL0L11660g		4380	260693	ChrL	1245685	1250064	W	CAGL-IPF4252|CAGL-CDS0119.1|CAG62249.1		CAL0135464	RPO31	YOR116C	YOR116C	Anc_5.426	YOR116C	RPO31	RNA polymerase III largest subunit C160; part of core enzyme; similar to bacterial beta-prime subunit and to RPA190 and RPO21				1	0	0	18	1.5	11.539		6.5195	1.41051	2.94348
CAGL0G07062g		1620	611422	ChrG	673014	671395	C	CAGL-IPF5615|CAGL-CDS1846.1|CAG59595.1		CAL0130091	YML020W		YML020W	Anc_5.554	YML020W		Putative protein of unknown function	dup			67	75	51	109	62.8305	102.32		82.575	1.4104	0.703544
CAGL0J09416g		447	709818	ChrJ	927418	926972	C	CAGL-IPF6950|CAGL-CDS4857.1|CAG61070.1		CAL0132998	SNA4	YDL123W	YDL123W	Anc_7.282	YDL123W	SNA4	Protein of unknown function; localized to the vacuolar outer membrane; predicted to be palmitoylated				200	328	248	257	238.764	315.474		277.119	1.40984	0.401933		0
CAGL0A01584g		258	81603	ChrA	158780	159037	W	CAGL-IPF14911|CAG57727.1		CAL0126847	AGA2	YGL032C	YGL032C	Anc_4.083	YGL032C	AGA2	Adhesion subunit of a-agglutinin of a-cells; C-terminal sequence acts as a ligand for alpha-agglutinin (Sag1p) during agglutination, modified with O-linked oligomannosyl chains, linked to anchorage subunit Aga1p via two disulfide bonds				118	216	114	117	123.327	177.504		150.415	1.40941	0.525359		0
CAGL0D05104g		804	-62630	ChrD	491556	492359	W	Novel_proteincoding8		CAL0000209768							#N/A				793	1011	687	737	779.129	938.014		858.571	1.40849	0.267747		0
CAGL0F02299g		612	-585	ChrF	225965	225354	C	CAGL-IPF5719|CAGL-CDS4424.1|CAG58995.1		CAL0131356	LOC1	YFR001W	YFR001W	Anc_8.091	YFR001W	LOC1	Nuclear protein involved in asymmetric localization of ASH1 mRNA; binds double-stranded RNA in vitro; constituent of 66S pre-ribosomal particles; relocalizes from nucleus to cytoplasm upon DNA replication stress				36	77	36	54	38.998	71.117		55.0575	1.40828	0.866794
CAGL0L09735g		2088	60519	ChrL	1046657	1048744	W	CAGL-IPF8762|CAGL-CDS1110.1|CAG62165.1		CAL0135262	HCS1	YKL017C	YKL017C	Anc_2.656	YKL017C	HCS1	Hexameric DNA polymerase alpha-associated DNA helicase A; involved in lagging strand DNA synthesis; contains single-stranded DNA stimulated ATPase and dATPase activities; replication protein A stimulates helicase and ATPase activities				762	900	547	650	685.859	831.575		758.717	1.4073	0.277935
CAGL0I10604g		636	255054	ChrI	1048151	1047516	C	CAGL-IPF6420|CAGL-CDS4345.1|CAG60646.1		CAL0132338	YGR126W	YGR126W	YGR126W	Anc_3.486	YGR126W		Putative protein of unknown function; green fluorescent protein (GFP)-fusion protein localizes to both the cytoplasm and the nucleus and is induced in response to the DNA-damaging agent MMS				148	271	121	109	142.216	200.32		171.268	1.40725	0.494224
CAGL0G02937g		1695	209049	ChrG	270679	268985	C	CAGL-IPF3602|CAGL-CDS1697.1|CAG59418.1		CAL0137595	PDC6	YGR087C			YGR087C	PDC6	Minor isoform of pyruvate decarboxylase; decarboxylates pyruvate to acetaldehyde, involved in amino acid catabolism; transcription is glucose- and ethanol-dependent, and is strongly induced during sulfur limitation				3460	3891	3224	3535	3521.93	4016.24		3769.09	1.40584	0.189479
CAGL0D06204g		1950	29531	ChrD	585093	583144	C	CAGL-IPF8554|CAGL-CDS1265.1|CAG58587.1		CAL0128259	RIM8	YGL045W	YGL045W	Anc_4.062	YGL045W	RIM8	Protein involved in proteolytic activation of Rim101p; part of response to alkaline pH; interacts with ESCRT-1 subunits Stp22p and Vps28p; essential for anaerobic growth; member of the arrestin-related trafficking adaptor family				1024	1321	958	987	1045.17	1239.39		1142.28	1.4046	0.245892		0
CAGL0A00583g		1941	-11050	ChrA	65286	67226	W	CAGL-IPF3342|CAGL-CDS1283.1|CAG57689.1|ZCF2		CAL0126565				Anc_4.121			#N/A				880	1148	717	736	839.293	1005.93		922.611	1.40437	0.26128		0
CAGL0L05456g	PHO86	921	-386064	ChrL	601578	600658	C	CAGL-IPF4548|CAGL-CDS3554.1|CAG61982.1		CAL0136176	PHO86	YJL117W	YJL117W	Anc_1.238	YJL117W	PHO86	Endoplasmic reticulum (ER) resident protein; required for ER exit of the high-affinity phosphate transporter Pho84p, specifically required for packaging of Pho84p into COPII vesicles; protein abundance increases in response to DNA replication stress				1	9	1	13	2.0555	13.1115		7.5835	1.40272	2.67327
CAGL0J08459g		2406	625195	ChrJ	843774	841369	C	CAGL-IPF6706|CAGL-CDS0812.1|CAG61028.1		CAL0132990	PSP1		YDR505C	Anc_1.055	YDR505C	PSP1	Asn and gln rich protein of unknown function; high-copy suppressor of POL1 (DNA polymerase alpha) and partial suppressor of CDC2 (polymerase delta) and CDC6 (pre-RC loading factor) mutations; overexpression results in growth inhibition; PSP1 has a paralog, YLR177W, that arose from the whole genome duplication	dup			161	322	224	195	205.932	276.173		241.052	1.40095	0.423402
CAGL0D02508g		858	-297258	ChrD	256901	257758	W	CAGL-IPF4862|CAGL-CDS3307.1|CAG58435.1		CAL0127971		YNL326C	YNL326C	Anc_3.012	YNL326C	PFA3	Palmitoyltransferase for Vac8p; required for vacuolar membrane fusion; contains an Asp-His-His-Cys-cysteine rich (DHHC-CRD) domain; autoacylates; required for vacuolar integrity under stress conditions				18	32	11	37	16.1105	38.6635		27.387	1.40042	1.26297
CAGL0M11704g	AHP1	528	115974	ChrM	1165319	1165846	W	CAGL-IPF6263|CAGL-CDS4636.1|CAG62830.1		CAL0136519	AHP1	YLR109W	YLR109W	Anc_8.300	YLR109W	AHP1	Thiol-specific peroxiredoxin; reduces hydroperoxides to protect against oxidative damage; function in vivo requires covalent conjugation to Urm1p				2142	2350	2013	2306	2190.22	2526.16		2358.19	1.39937	0.205871
CAGL0B04323g		1293	-27846	ChrB	422687	423979	W	CAGL-IPF697|CAGL-CDS2562.1|CAG58058.1		CAL0127034		YBR026C	YBR026C	Anc_3.228	YBR026C	ETR1	2-enoyl thioester reductase; member of the medium chain dehydrogenase/reductase family; localized to in mitochondria, where it has a probable role in fatty acid synthesis				667	854	570	620	651.135	791.01		721.072	1.39871	0.280739
CAGL0A04235g		2160	343725	ChrA	419951	422110	W	CAGL-IPF1155|CAGL-CDS1027.1|CAG57844.1		CAL0126871	SAS3	YBL052C	YBL052C	Anc_7.371	YBL052C	SAS3	Histone acetyltransferase catalytic subunit of NuA3 complex; acetylates histone H3, involved in transcriptional silencing; homolog of the mammalian MOZ proto-oncogene; mutant has aneuploidy tolerance; sas3gcn5 double mutation is lethal				113	190	82	96	103.051	152.208		127.63	1.39734	0.562686		0
CAGL0I01232g		633	-690451	ChrI	102013	102645	W	CAGL-IPF2059|CAGL-CDS4352.1|CAG60245.1		CAL0132498	ERP5	YHR110W	YHR110W	Anc_5.420	YHR110W	ERP5	Protein with similarity to Emp24p and Erv25p; member of the p24 family involved in ER to Golgi transport				609	729	513	608	590.471	721.484		655.978	1.39677	0.2891		0
CAGL0J07348g		1596	494917	ChrJ	711496	713091	W	CAGL-IPF2374|CAGL-CDS1892.1|CAG60977.1		CAL0132782	CNM67	YNL225C	YNL225C	Anc_2.016	YNL225C	CNM67	Component of the spindle pole body outer plaque; required for spindle orientation and mitotic nuclear migration; CNM67 has a paralog, ADY3, that arose from the whole genome duplication	dup			1	15	0	5	1.5	11.4275		6.46375	1.39656	2.92948
CAGL0L04730g		1125	-443771	ChrL	542849	543973	W	CAGL-IPF8148|CAGL-CDS2946.1|CAG61951.1		CAL0136058	SHY1	YGR112W	YGR112W	Anc_3.457	YGR112W	SHY1	Mitochondrial inner membrane protein required for complex IV assembly; associates with complex IV assembly intermediates and complex III/complex IV supercomplexes; similar to human SURF1 involved in Leigh Syndrome; complex IV is also known as cytochrome c oxidase				52	121	50	51	54.775	91.3605		73.0678	1.39007	0.738053
CAGL0I08569g		2334	43621	ChrI	835234	837567	W	CAGL-IPF4361|CAGL-CDS0861.1|CAG60558.1		CAL0132438	COG3	YER157W	YER157W	Anc_8.210	YER157W	COG3	Essential component of the conserved oligomeric Golgi complex; a cytosolic tethering complex (Cog1p through Cog8p) that functions in protein trafficking to mediate fusion of transport vesicles to Golgi compartments				363	569	351	325	377.481	475.788		426.634	1.3873	0.333915
CAGL0I01782g		3156	-644721	ChrI	146481	149636	W	CAGL-IPF2094|CAGL-CDS0376.1|CAG60265.1	n	CAL0129925		YGR218W	YGR218W	Anc_5.111	YGR218W	CRM1	Major karyopherin; involved in export of proteins, RNAs, and ribosomal subunits from the nucleus; exportin	dup			268	458	250	214	273.875	355.297		314.586	1.38684	0.375508
CAGL0L12914g		2658	393396	ChrL	1381906	1379249	C	CAGL-IPF9369|CAG62304.1		CAL0135934	YKL050C	YMR031C	YMR031C	Anc_2.590	YMR031C	EIS1	Component of the eisosome required for proper eisosome assembly; similar to Uso1p; authentic, non-tagged protein is detected in a phosphorylated state in highly purified mitochondria in high-throughput studies; protein increases in abundance and relocalizes from plasma membrane to cytoplasm upon DNA replication stress; EIS1 has a paralog, YKL050C, that arose from the whole genome duplication				103	133	104	159	110.272	160.594		135.433	1.38529	0.542356
CAGL0E05302g		2490	269562	ChrE	516790	514301	C	CAGL-IPF5025|CAGL-CDS0737.1|CAG58838.1		CAL0128692	SCD5	YOR329C	YOR329C	Anc_7.066	YOR329C	SCD5	Protein required for normal actin organization and endocytosis; targeting subunit for protein phosphatase type 1; undergoes Crm1p-dependent nuclear-cytoplasmic shuttling; multicopy suppressor of clathrin deficiency				91	144	58	83	78.719	121.596		100.158	1.38503	0.627318
CAGL0H06127g		264	-357374	ChrH	597557	597820	W	CAGL-IPF13323|CAG59994.1		CAL0130367		YEL020W-A	YEL020W-A	Anc_1.452	YEL020W-A	TIM9	Essential protein of the mitochondrial intermembrane space; forms a complex with Tim10p (TIM10 complex) that delivers hydrophobic proteins to the TIM22 complex for insertion into the inner membrane				238	345	178	200	218.879	290.6		254.74	1.3849	0.408901
CAGL0K00583g		897	-190198	ChrK	67970	67074	C	CAGL-IPF5165|CAGL-CDS3611.1|CAG61210.1		CAL0133795	ELO1	YJL196C	YJL196C	Anc_1.140	YJL196C	ELO1	Elongase I, medium-chain acyl elongase; catalyzes carboxy-terminal elongation of unsaturated C12-C16 fatty acyl-CoAs to C16-C18 fatty acids; ELO1 has a paralog, FEN1, that arose from the whole genome duplication	dup			1116	1325	1043	1157	1138.39	1340.92		1239.65	1.37964	0.236236
CAGL0K01881g		1521	-89021	ChrK	167939	169459	W	CAGL-IPF8713|CAGL-CDS2040.1|CAG61268.1		CAL0134749	SLX5	YDL013W	YDL013W	Anc_3.186	YDL013W	SLX5	Subunit of the Slx5-Slx8 SUMO-targeted ubiquitin ligase complex; stimulated by SUMO-modified substrates; contains a RING domain and two SIMs (SUMO-interacting motifs); forms SUMO-dependent nuclear foci, including DNA repair centers; the SUMO-targeted ubiquitin ligase complex is also known as the STUbL complex				111	213	183	189	158.156	218.16		188.158	1.37838	0.46403
CAGL0F06765g		669	438192	ChrF	664771	664103	C	CAGL-IPF479|CAGL-CDS4235.1|CAG59186.1		CAL0131370	INA22	YIR024C	YIR024C	Anc_2.652	YIR024C		Protein of unknown function; the authentic, non-tagged protein is detected in highly purified mitochondria in high-throughput studies; interacts with Arh1p, a mitochondrial oxidoreductase; deletion mutant has a respiratory growth defect				488	554	379	490	455.534	564.895		510.215	1.37627	0.310422
CAGL0F02475g		1149	13572	ChrF	240391	239243	C	CAGL-IPF5710|CAGL-CDS2886.1|CAG59001.1		CAL0129731	PRP21	YJL203W	YJL203W	Anc_1.132	YJL203W	PRP21	Subunit of the SF3a splicing factor complex; required for spliceosome assembly				296	420	221	241	271.765	352.106		311.935	1.37528	0.373645
CAGL0I06336g	NUC1	969	-184619	ChrI	608645	607677	C	CAGL-IPF1415|CAGL-CDS3392.1|CAG60463.1		CAL0129813	NUC1	YJL208C	YJL208C	Anc_1.126	YJL208C	NUC1	Major mitochondrial nuclease; has RNAse and DNA endo- and exonucleolytic activities; roles in mitochondrial recombination, apoptosis and maintenance of polyploidy; involved in fragmentation of genomic DNA during PND (programmed nuclear destruction); encodes ortholog of mammalian endoG				29	74	40	52	37.72	68.446		53.083	1.36983	0.859637
CAGL0G05742g		627	491170	ChrG	552266	551640	C	CAGL-IPF3489|CAGL-CDS4377.1|CAG59538.1		CAL0130025	NOP6	YDL213C	YDL213C	Anc_2.072	YDL213C	NOP6	rRNA-binding protein required for 40S ribosomal subunit biogenesis; contains an RNA recognition motif (RRM); hydrophilin essential to overcome the stress of the desiccation-rehydration process; NOP6 may be a fungal-specific gene as no homologs have been yet identified in higher eukaryotes				183	384	230	168	220.265	291.364		255.815	1.3693	0.403582
CAGL0C05511g		930	109298	ChrC	531914	530985	C	CAGL-IPF4066|CAGL-CDS3525.1|CAG58320.1		CAL0127630	PHO13	YDL236W	YDL236W	Anc_2.025	YDL236W	PHO13	Alkaline phosphatase specific for p-nitrophenyl phosphate; also has protein phosphatase activity				88	131	53	84	74.4415	115.682		95.0618	1.36831	0.635985
CAGL0G05467g		1188	456624	ChrG	518000	516813	C	CAGL-IPF3514|CAGL-CDS2795.1|CAG59525.1		CAL0129835		YNL199C	YNL199C	Anc_2.050	YNL199C	GCR2	Transcriptional activator of genes involved in glycolysis; interacts and functions with the DNA-binding protein Gcr1p	dup			120	185	97	123	114.883	165.517		140.2	1.36766	0.526803
CAGL0L09273g		1716	19836	ChrL	1007875	1006160	C	CAGL-IPF7470|CAGL-CDS1658.1|CAG62149.1		CAL0135030	ICL2	YPR006C	YPR006C	Anc_8.103	YPR006C	ICL2	2-methylisocitrate lyase of the mitochondrial matrix; functions in the methylcitrate cycle to catalyze the conversion of 2-methylisocitrate to succinate and pyruvate; ICL2 transcription is repressed by glucose and induced by ethanol				1243	1569	1148	1179	1260.21	1475.8		1368.01	1.36531	0.227833
CAGL0J03190g		339	91499	ChrJ	309045	308707	C	CAGL-IPF6926|CAGL-CDS5303.1|CAG60792.1		CAL0133432	TDA2	YER071C	YER071C	Anc_7.259	YER071C	TDA2	Protein of unknown function; green fluorescent protein (GFP)-fusion protein localizes to the cytoplasm in a punctate pattern; null mutant is sensitive to expression of the top1-T722A allele				198	243	139	201	177.214	240.185		208.7	1.364	0.438652
CAGL0L06600g	NAS6	696	-242034	ChrL	744800	745495	W	CAGL-IPF7643|CAGL-CDS4155.1|CAG62033.1		CAL0136118	NAS6	YGR232W	YGR232W	Anc_5.097	YGR232W	NAS6	Assembly chaperone for the 19S proteasome regulatory particle base; proteasome-interacting protein involved in the assembly of the base subcomplex of the 19S proteasomal regulatory particle (RP); ortholog of human oncoprotein gankyrin, which interacts with the Rb tumor suppressor and CDK4/6				176	262	184	213	191.212	256.712		223.962	1.36259	0.424975
CAGL0F02717g	PDH1	4629	37430	ChrF	261361	265989	W	CAGL-IPF9719|CAG59012.1|CDR2		CAL0129834	PDR15	YDR406W	YDR406W	Anc_5.500	YDR406W	PDR15	Plasma membrane ATP binding cassette (ABC) transporter; multidrug transporter and general stress response factor implicated in cellular detoxification; regulated by Pdr1p, Pdr3p and Pdr8p; promoter contains a PDR responsive element; PDR15 has a paralog, PDR5, that arose from the whole genome duplication	dup			6692	7039	5950	6749	6652.23	7472.04		7062.13	1.36242	0.167665		0
CAGL0G07733g		1641	674194	ChrG	735797	734157	C	CAGL-IPF8255|CAGL-CDS1794.1|CAG59625.1		CAL0130005		YKR017C	YKR017C	Anc_1.286	YKR017C	HEL1	RING finger ubiquitin ligase (E3); involved in ubiquitylation and degradation of excess histones; interacts with Ubc4p and Rad53p; null mutant sensitive to hydroxyurea (HU)				153	189	88	143	126.384	179.226		152.805	1.36194	0.50397
CAGL0C01397g		2289	-272119	ChrC	151177	148889	C	CAGL-IPF7239|CAGL-CDS0907.1|CAG58141.1		CAL0127238	PFK26		YIL107C	Anc_2.264	YIL107C	PFK26	6-phosphofructo-2-kinase; inhibited by phosphoenolpyruvate and sn-glycerol 3-phosphate; has negligible fructose-2,6-bisphosphatase activity; transcriptional regulation involves protein kinase A	dup			63	99	68	102	70.274	110.221		90.2475	1.36128	0.649336
CAGL0H02695g		1650	-709677	ChrH	246210	244561	C	CAGL-IPF8752|CAGL-CDS1774.1|CAG59845.1		CAL0129886	GLG1	YKR058W	YKR058W	Anc_1.212	YKR058W	GLG1	Glycogenin glucosyltransferase; self-glucosylating initiator of glycogen synthesis, also glucosylates n-dodecyl-beta-D-maltoside; similar to mammalian glycogenin; GLG1 has a paralog, GLG2, that arose from the whole genome duplication				147	237	118	130	140.049	195.615		167.832	1.36011	0.482085
CAGL0L01287g	UTR4	756	-838987	ChrL	147817	148572	W	CAGL-IPF7403|CAGL-CDS3991.1|CAG61799.1		CAL0135438	UTR4	YEL038W	YEL038W	Anc_1.481	YEL038W	UTR4	Protein with sequence similarity to acireductone synthases; involved in methionine salvage; found in both the cytoplasm and nucleus				64	109	61	86	66.8855	105.853		86.3693	1.35817	0.662297
CAGL0J01914g		510	-25210	ChrJ	192421	191912	C	CAGL-IPF6465|CAGL-CDS4670.1|CAG60737.1		CAL0133606	IST3	YIR005W	YIR005W	Anc_7.159	YIR005W	IST3	Component of the U2 snRNP; required for the first catalytic step of splicing and for spliceosomal assembly; interacts with Rds3p and is required for Mer1p-activated splicing				161	205	108	160	141.494	197.18		169.337	1.35626	0.478772
CAGL0I02266g		7245	-593076	ChrI	203326	196082	C	CAGL-IPF8088|CAGL-CDS0016.1|CAG60287.1		CAL0132200	PRP8	YHR165C	YHR165C	Anc_5.073	YHR165C	PRP8	Component of U4/U6-U5 snRNP complex; involved in second catalytic step of splicing; participates in spliceosomal assembly through its interaction with U1 snRNA; mutations of human Prp8 cause retinitis pigmentosa				383	503	259	296	336.375	425.808		381.091	1.35421	0.340135
CAGL0I01892g		1647	-635567	ChrI	158036	156390	C	CAGL-IPF2105|CAGL-CDS1777.1|CAG60270.1		CAL0132194	MTC6	YHR151C	YHR151C	Anc_5.102	YHR151C	MTC6	Protein of unknown function; mtc6 is synthetically sick with cdc13-1				24	34	10	40	18.555	41.42		29.9875	1.3516	1.15852
CAGL0D03432g		1203	-200698	ChrD	354491	353289	C	CAGL-IPF4750|CAGL-CDS2764.1|CAG58476.1		CAL0128015	RNR4		YJL026W	Anc_5.179	YGR180C	RNR4	Ribonucleotide-diphosphate reductase (RNR) small subunit; the RNR complex catalyzes the rate-limiting step in dNTP synthesis and is regulated by DNA replication and DNA damage checkpoint pathways via localization of the small subunits; relocalizes from nucleus to cytoplasm upon DNA replication stress; RNR4 has a paralog, RNR2, that arose from the whole genome duplication	dup			5	21	1	10	4.0555	17.355		10.7052	1.35124	2.0974
CAGL0M12298g		2985	179186	ChrM	1230287	1227303	C	ZCF38|CAGL-IPF6320|CAGL-CDS0448.1|CAG62857.1		CAL0136757	OAF1		YAL051W	Anc_7.017	YAL051W	OAF1	Oleate-activated transcription factor; acts alone and as a heterodimer with Pip2p; activates genes involved in beta-oxidation of fatty acids and peroxisome organization and biogenesis; involved in diauxic shift; OAF1 has a paralog, PIP2, that arose from the whole genome duplication	dup			408	491	349	429	398.87	497.68		448.274	1.35105	0.3193		0
CAGL0G03267g		1278	248819	ChrG	310240	308963	C	CAGL-IPF3623|CAGL-CDS2602.1|CAG59432.1		CAL0130592	AST2	YER101C	YER101C	Anc_7.393	YER101C	AST2	Lipid raft associated protein; overexpression restores Pma1p localization to lipid rafts which is required for targeting of Pma1p to the plasma membrane; sometimes classified in the medium-chain dehydrogenase/reductases (MDRs) superfamily; AST2 has a paralog, AST1, that arose from the whole genome duplication				286	495	370	328	349.535	440.544		395.039	1.34752	0.333849		0
CAGL0D03740g		885	-177226	ChrD	376920	377804	W	CAGL-IPF4731|CAGL-CDS3654.1|CAG58489.1		CAL0128221	RPP1	YHR062C	YHR062C	Anc_5.332	YHR062C	RPP1	Subunit of both RNase MRP and nuclear RNase P; RNase MRP cleaves pre-rRNA, while nuclear RNase P cleaves tRNA precursors to generate mature 5' ends and facilitates turnover of nuclear RNAs; relocalizes to the cytosol in response to hypoxia				30	116	73	57	56.5515	92.3735		74.4625	1.34631	0.707914
CAGL0H05797g		342	-381739	ChrH	573153	573494	W	CAGL-IPF4404|CAGL-CDS5276.1|CAG59981.1		CAL0131906	MGR2	YPL098C	YPL098C	Anc_8.578	YPL098C	MGR2	Subunit of the TIM23 translocase complex; acts to couple Tim21p with the core Tim23 translocase; absolutely required for mitochondrial import of presequence-containing proteins at elevated temperature; required for viability of cells lacking the mitochondrial genome (petite-negative phenotype)				10	26	4	19	8.222	25.1245		16.6732	1.34581	1.61153
CAGL0L10582g		3297	145994	ChrL	1131528	1134824	W	CAGL-IPF4172|CAGL-CDS0324.1|CAG62201.1		CAL0136028	YMR196W	YMR196W	YMR196W	Anc_6.286	YMR196W		Putative protein of unknown function; green fluorescent protein (GFP)-fusion protein localizes to the cytoplasm; YMR196W is not an essential gene	dup			2020	2300	1735	1915	1974.79	2272.23		2123.51	1.34571	0.202409
CAGL0M07403g	OAZ1	594	-301507	ChrM	747805	748398	W	CAGL-IPF9960|CAGL-CDS4472.1|CAG62646.1		CAL0136773	OAZ1	YPL052W	YPL052W	Anc_8.504	YPL052W	OAZ1	Regulator of ornithine decarboxylase Spe1p; antizyme that binds to Spe1p to stimulate ubiquitin-independent degradation by the proteasome; binding of polyamines to nascent Oaz1p during translation stimulates +1 ribosomal frameshifting, allowing translation of full-length Oaz1p				1110	1348	1035	1114	1130.94	1327.25		1229.09	1.34546	0.230911
CAGL0K11902g		2496	892738	ChrK	1151705	1149210	C	CAGL-IPF8500|CAGL-CDS0730.1|CAG61696.1|ZCF29		CAL0133903	LYS14	YDR034C	YDR034C	Anc_3.264	YDR034C	LYS14	Transcriptional activator involved in regulating lysine biosynthesis; involved in the regulation of genes of the lysine biosynthesis pathway; requires 2-aminoadipate semialdehyde as co-inducer				108	180	122	142	122.771	174.141		148.456	1.34466	0.504286		0
CAGL0I04972g		384	-337716	ChrI	455255	454872	C	CAGL-IPF14624|CAG60403.1		CAL0132642	IES5	YER092W	YER092W	Anc_7.379	YER092W	IES5	Protein that associates with the INO80 chromatin remodeling complex; associates with the complex under low-salt conditions				19	34	9	32	15.4995	36.736		26.1178	1.34405	1.24497
CAGL0K10230g		1341	739253	ChrK	997643	996303	C	CAGL-IPF3211|CAGL-CDS2429.1|CAG61627.1		CAL0133947	LEO1	YOR123C	YOR123C	Anc_5.440	YOR123C	LEO1	Component of the Paf1 complex; which associates with RNA polymerase II and is involved in histone methylation; plays a role in regulating Ty1 transposition; involved in transcription elongation as demonstrated by the G-less-based run-on (GLRO) assay				159	264	180	188	180.49	243.074		211.782	1.34404	0.429477
CAGL0I01100g	GCY1	933	-700621	ChrI	92625	91693	C	CAGL-IPF2049|CAGL-CDS3510.1|CAG60239.1		CAL0132054	GCY1		YOR120W	Anc_5.434	YOR120W	GCY1	Glycerol dehydrogenase; involved in an alternative pathway for glycerol catabolism used under microaerobic conditions; also has mRNA binding activity; member of the aldo-keto reductase (AKR) family; protein abundance increases in response to DNA replication stress; GCY1 has a paralog, YPR1, that arose from the whole genome duplication	dup			2369	2641	2037	2275	2317.05	2653.51		2485.28	1.34397	0.195612
CAGL0J08437g		804	622694	ChrJ	840472	839669	C	CAGL-IPF6709|CAGL-CDS3852.1|CAG61027.1		CAL0133600	LPP1	YDR503C	YDR503C	Anc_1.057	YDR503C	LPP1	Lipid phosphate phosphatase; catalyzes Mg(2+)-independent dephosphorylation of phosphatidic acid (PA), lysophosphatidic acid, and diacylglycerol pyrophosphate; involved in control of the cellular levels of phosphatidylinositol and PA				288	319	281	382	301.096	384.161		342.628	1.34287	0.35149
CAGL0L10626g		1608	149768	ChrL	1136146	1137753	W	CAGL-IPF4175|CAGL-CDS1992.1|CAG62203.1		CAL0135628	CIK1	YPL253C	YMR198W	Anc_6.289	YMR198W	CIK1	Kinesin-associated protein; required for both karyogamy and mitotic spindle organization, interacts stably and specifically with Kar3p and may function to target this kinesin to a specific cellular role; CIK1 has a paralog, VIK1, that arose from the whole genome duplication	dup			59	110	77	98	73.2735	113.379		93.3263	1.34261	0.62979
CAGL0B03883g		921	-67117	ChrB	383602	384522	W	CAGL-IPF729|CAGL-CDS3558.1|CAG58039.1		CAL0127152				Anc_5.149			#N/A				1066	1441	1058	1016	1121.72	1316.37		1219.04	1.34216	0.230852
CAGL0M09471g		327	-107113	ChrM	942659	942333	C	CAGL-IPF9382|CAGL-CDS5388.1|CAG62734.1		CAL0136947	ATG16	YMR159C	YMR159C	Anc_2.354	YMR159C	ATG16	Conserved protein involved in autophagy; interacts with Atg12p-Atg5p conjugates to form Atg12p-Atg5p-Atg16p multimers, which localize to the pre-autophagosomal structure and are required for autophagy; relocalizes from nucleus to cytoplasmic foci upon DNA replication stress				9	38	1	2	6.0555	21.171		13.6133	1.34005	1.80577
CAGL0I00572g		318	-748841	ChrI	43780	44097	W	CAGL-IPF2010|CAGL-CDS5455.1|CAG60215.1		CAL0132298	ATP14	YLR295C	YLR295C	Anc_6.092	YLR295C	ATP14	Subunit h of the F0 sector of mitochondrial F1F0 ATP synthase; F1F0 ATP synthase is a large, evolutionarily conserved enzyme complex required for ATP synthesis; protein abundance increases in response to DNA replication stress				55	66	56	106	59.608	96.063		77.8355	1.33934	0.688475
CAGL0A02409g		1338	183447	ChrA	261421	260084	C	CAGL-IPF2961|CAGL-CDS2441.1|CAG57762.1		CAL0126575	PAL1	YHR097C	YDR348C	Anc_5.399	YDR348C	PAL1	Protein of unknown function thought to be involved in endocytosis; physically interacts with Ede1p and is found at endocytic sites at cell periphery during early stages of endocytosis; green fluorescent protein (GFP)-fusion protein localizes to bud neck; potential Cdc28p substrate; similar to S. pombe Pal1 protein; relocalizes from bud neck to cytoplasm upon DNA replication stress; PAL1 has a par…				15	37	58	89	40.719	71.6095		56.1642	1.33726	0.814449
CAGL0A00517g		3369	-16792	ChrA	58830	62198	W	CAGL-IPF3337|CAGL-CDS0297.1|CAG57686.1		CAL0126587	PMC1	YGL006W	YGL006W	Anc_4.117	YGL006W	PMC1	Vacuolar Ca2+ ATPase involved in depleting cytosol of Ca2+ ions; prevents growth inhibition by activation of calcineurin in the presence of elevated concentrations of calcium; similar to mammalian PMCA1a				3396	3768	2904	3198	3312.17	3757.43		3534.8	1.33544	0.181968
CAGL0L03938g		1914	-524706	ChrL	461519	463432	W	CAGL-IPF2669|CAGL-CDS1322.1|CAG61915.1		CAL0136036	YNL115C	YNL115C	YNL115C	Anc_2.158	YNL115C		Putative protein of unknown function; green fluorescent protein (GFP)-fusion protein localizes to mitochondria; YNL115C is not an essential gene				636	776	531	603	613.971	742.057		678.014	1.33511	0.27336
CAGL0K09306g		1593	661893	ChrK	918817	920409	W	CAGL-IPF8784|CAGL-CDS1908.1|CAG61587.1		CAL0134853	CTR86	YCR054C	YCR054C	Anc_6.324	YCR054C	CTR86	Essential protein of unknown function; with orthologs in Ashbya gossypii and Candida albicans; similar to human ATXN10, mutations in which cause spinocerebellar ataxia type 10; codon usage corresponds to that observed for yeast genes expressed at low levels; relative distribution to the nucleus increases upon DNA replication stress				73	128	94	117	89.717	133.504		111.61	1.335	0.573424
CAGL0G06600g		717	570289	ChrG	631430	630714	C	CAGL-IPF3418|CAGL-CDS4094.1|CAG59574.1		CAL0130755	MIC27	YNL100W	YNL100W	Anc_2.178	YNL100W	AIM37	Mitochondrial inner membrane protein; component of the mitochondrial inner membrane organizing system (MitOS, MICOS, or MINOS), a scaffold-like structure on the intermembrane space side of the inner membrane which has a role in the maintenance of crista junctions and inner membrane architecture				57	116	65	76	65.6075	103.498		84.5528	1.3343	0.65767
CAGL0J02838g		483	60591	ChrJ	278209	277727	C	CAGL-IPF6545|CAGL-CDS4736.1|CAG60776.1		CAL0133118	RSM18	YER050C	YER050C	Anc_7.223	YER050C	RSM18	Mitochondrial ribosomal protein of the small subunit; has similarity to E. coli S18 ribosomal protein				8	20	15	38	13.3325	33.249		23.2908	1.33388	1.31836
CAGL0I02948g		945	-533763	ChrI	259489	258545	C	CAGL-IPF7331|CAGL-CDS3478.1|CAG60316.1		CAL0130488	SEC20	YDR498C	YDR498C	Anc_3.083	YDR498C	SEC20	Membrane glycoprotein v-SNARE; involved in retrograde transport from the Golgi to the endoplasmic reticulum (ER); required for N- and O-glycosylation in the Golgi but not in the ER; interacts with the Dsl1p complex through Tip20p				238	282	170	240	214.435	282.52		248.477	1.3333	0.397813
CAGL0L13299g	EPA11	4893	441958	ChrL	1426694	1431586	W	Cagl0L.mRNA.at.522.p|CAR58071.1|CAGL0L13310gCAGL0L13310g		CAL0135318							#N/A				2396	2511	2390	2778	2526.64	2883.02		2704.83	1.33002	0.190357
CAGL0M11902g		1122	133004	ChrM	1182052	1183173	W	CAGL-IPF6280|CAGL-CDS2954.1|CAG62839.1		CAL0137225	FUN19	YOR338W	YAL034C	Anc_7.055	YAL034C	FUN19	Non-essential protein of unknown function; expression induced in response to heat stress; FUN19 has a paralog, YOR338W, that arose from the whole genome duplication	dup			710	897	556	597	664.858	799.043		731.951	1.32776	0.265228
CAGL0L13046g		672	407643	ChrL	1394489	1395160	W	CAGL-IPF8541|CAGL-CDS4228.1|CAG62310.1		CAL0136174	CIA2	YHR122W	YHR122W	Anc_2.139	YHR122W	CIA2	Component of cytosolic iron-sulfur protein assembly (CIA) machinery; acts at a late step of Fe-S cluster assembly; forms the CIA targeting complex with Cia1p and Met18p that directs Fe-S cluster incorporation into a subset of proteins involved in methionine biosynthesis, DNA replication and repair, transcription, and telomere maintenance; ortholog of human FAM96B				275	373	298	340	304.039	386.57		345.304	1.32775	0.346473
CAGL0L12518g		351	362264	ChrL	1349621	1349271	C	CAGL-IPF8595|CAG62286.1		CAL0135368							#N/A				26	46	9	30	18.9995	41.565		30.2822	1.32486	1.12941
CAGL0M01232g		2160	-909399	ChrM	139130	141289	W	CAGL-IPF9105|CAGL-CDS1030.1|CAG62374.1		CAL0136675	RQC1	YDR333C	YDR333C	Anc_5.380	YDR333C	RQC1	Component of the ribosome quality control complex (RQC); RQC (Rqc1p-Rkr1p-Tae2p-Cdc48p-Npl4p-Ufd1p) is a ribosome-bound complex required for the degradation of polypeptides arising from stalled translation; required along with Rkr1p for recruitment of the Cdc48p-Npl4p-Ufd1p AAA ATPase complex to the RQC				244	320	224	272	247.432	320.256		283.844	1.31846	0.372194
CAGL0K03069g		609	27774	ChrK	285798	285190	C	CAGL-IPF2214|CAGL-CDS4489.1|CAG61319.1		CAL0134927	IRC21	YMR073C	YMR073C	Anc_2.536	YMR073C	IRC21	Putative protein of unknown function; may be involved in resistance to carboplatin and cisplatin; null mutant displays increase in spontaneous Rad52p foci; contains a lipid-binding domain and binds cardiolipin in a large-scale study				222	323	205	226	225.877	294.823		260.35	1.31354	0.384309
CAGL0J06974g		2037	451452	ChrJ	667811	669847	W	CAGL-IPF2350|CAGL-CDS1158.1|CAG60960.1		CAL0133106	HOS3	YPL116W	YPL116W	Anc_8.607	YPL116W	HOS3	Trichostatin A-insensitive homodimeric histone deacetylase (HDAC); specificity in vitro for histones H3, H4, H2A, and H2B; similar to Hda1p, Rpd3p, Hos1p, and Hos2p; deletion results in increased histone acetylation at rDNA repeats				264	341	222	271	256.321	330.171		293.246	1.31125	0.36526		0
CAGL0D03674g		3561	-182742	ChrD	370066	373626	W	CAGL-IPF4735|CAGL-CDS0252.1|CAG58486.1		CAL0128197	NEW1	YPL226W	YPL226W	Anc_6.251	YPL226W	NEW1	ATP binding cassette protein; cosediments with polysomes and is required for biogenesis of the small ribosomal subunit; Asn/Gln-rich rich region supports [NU+] prion formation and susceptibility to [PSI+] prion induction				28	68	38	51	36.109	64.8605		50.4847	1.31091	0.844982		0
CAGL0L01441g		1818	-824281	ChrL	163809	161992	C	CAGL-IPF7412|CAGL-CDS1479.1|CAG61805.1		CAL0135948	PRP39	YML046W	YML046W	Anc_1.493	YML046W	PRP39	U1 snRNP protein involved in splicing; contains multiple tetriatricopeptide repeats				155	225	144	174	158.492	215.377		186.935	1.31047	0.442454
CAGL0D00352g		2586	-510349	ChrD	45531	42946	C	CAGL-IPF2561|CAGL-CDS0664.1|CAG58339.1		CAL0128185	PXA2	YKL188C	YKL188C	Anc_4.287	YKL188C	PXA2	Subunit of a heterodimeric peroxisomal ABC transport complex; required for import of long-chain fatty acids into peroxisomes; similarity to human adrenoleukodystrophy transporter ABCD1 and ABCD2 and ALD-related proteins; mutations in ABCD1 cause X-linked adrenoleukodystrophy (X-ALD), a peroxisomal disorder; complex also includes Pxa1p				253	336	183	221	229.156	298.395		263.776	1.30899	0.380893
CAGL0H06787g		1230	-277523	ChrH	676925	678154	W	CAGL-IPF274|CAGL-CDS2704.1|CAG60024.1		CAL0131584	POT1	YIL160C	YIL160C	Anc_5.718	YIL160C	POT1	3-ketoacyl-CoA thiolase with broad chain length specificity; cleaves 3-ketoacyl-CoA into acyl-CoA and acetyl-CoA during beta-oxidation of fatty acids				297	306	199	308	260.044	334.334		297.189	1.30854	0.362532
CAGL0M08668g		1974	-185641	ChrM	862981	864954	W	CAGL-IPF9949|CAGL-CDS1248.1|CAG62698.1		CAL0136619	HEL2	YDR266C	YDR266C	Anc_5.629	YDR266C	HEL2	RING finger ubiquitin ligase (E3); involved in ubiquitylation and degradation of excess histones; interacts with Ubc4p and Rad53p; null mutant sensitive to hydroxyurea (HU); green fluorescent protein (GFP)-fusion protein localizes to the cytoplasm; computational analysis suggests a role as a transcription factor				144	165	170	243	167.435	225.776		196.606	1.30637	0.431294
CAGL0G04037g		2337	323453	ChrG	383068	385404	W	CAGL-IPF7108|CAGL-CDS0859.1|CAG59465.1		CAL0130354	YLL032C	YLL032C	YLL032C	Anc_4.026	YLL032C		Protein of unknown function; may interact with ribosomes, based on co-purification experiments; green fluorescent protein (GFP)-fusion protein localizes to the cytoplasm; YLL032C is not an essential gene				324	467	283	289	320.207	403.71		361.958	1.3049	0.334315
CAGL0J03696g		1341	137665	ChrJ	355712	354372	C	CAGL-IPF6886|CAGL-CDS2434.1|CAG60814.1		CAL0129567	ESA1	YOR244W	YOR244W	Anc_8.673	YOR244W	ESA1	Catalytic subunit of the histone acetyltransferase complex (NuA4); acetylates four conserved internal lysines of histone H4 N-terminal tail and can acetylate histone H2A; required for cell cycle progression and transcriptional silencing at the rDNA locus and regulation of autophagy				35	61	28	52	34.054	61.946		48	1.30342	0.863187
CAGL0K02761g		1353	-7151	ChrK	249893	251245	W	CAGL-IPF2233|CAGL-CDS2397.1|CAG61306.1		CAL0134043	HSE1	YHL002W	YHL002W	Anc_2.502	YHL002W	HSE1	Subunit of the endosomal Vps27p-Hse1p complex; complex is required for sorting of ubiquitinated membrane proteins into intralumenal vesicles prior to vacuolar degradation, as well as for recycling of Golgi proteins and formation of lumenal membranes				1119	1379	959	1004	1093.22	1278.34		1185.78	1.30237	0.225684
CAGL0B03663g		1392	-82869	ChrB	367614	369005	W	CAGL-IPF748|CAGL-CDS2297.1|CAG58031.1		CAL0127902	CIT2	YNR001C	YCR005C	Anc_1.422	YCR005C	CIT2	Citrate synthase; catalyzes the condensation of acetyl coenzyme A and oxaloacetate to form citrate, peroxisomal isozyme involved in glyoxylate cycle; expression is controlled by Rtg1p and Rtg2p transcription factors; CIT2 has a paralog, CIT1, that arose from the whole genome duplication	dup			11737	11776	10051	11663	11452.8	12717.7		12085.3	1.30132	0.151132
CAGL0L05346g		996	-394168	ChrL	592516	593511	W	CAGL-IPF4557|CAGL-CDS3316.1|CAG61977.1		CAL0135214	CCE1	YKL011C	YKL011C	Anc_2.647	YKL011C	CCE1	Mitochondrial cruciform cutting endonuclease; cleaves Holliday junctions formed during recombination of mitochondrial DNA; CCE1 has a paralog, MRS1, that arose from the whole genome duplication				109	164	97	125	109.383	156.188		132.786	1.30038	0.513884
CAGL0J05962g		882	347555	ChrJ	565372	564491	C	CAGL-IPF2278|CAGL-CDS3666.1|CAG60916.1		CAL0133748	CUZ1	YNL155W	YNL155W	Anc_2.106	YNL155W	CUZ1	Protein with a role in the ubiquitin-proteasome pathway; interacts with ubiquitinated protein, Cdc48p and the proteasomal regulatory particle; may protect cells from trivalent metalloid induced proteotoxicity; contains a PACE promoter element and is co-regulated with proteasome subunit genes; AN1-type zinc finger protein, with DHHC and ubiquitin-like domains (UBL); ortholog of ZFAND1, a human gen…				167	279	211	214	201.71	265.797		233.754	1.29989	0.398039
CAGL0C01771g		1458	-234393	ChrC	187030	188487	W	CAGL-IPF7273|CAGL-CDS2156.1|CAG58158.1		CAL0127386	YBR241C	YGL104C	YBR241C	Anc_6.155	YBR241C		Putative transporter, member of the sugar porter family; green fluorescent protein (GFP)-fusion protein localizes to the vacuolar membrane; YBR241C is not an essential gene; YBR241C has a paralog, VPS73, that arose from the whole genome duplication				831	992	752	837	834.236	987.063		910.65	1.2994	0.242687
CAGL0G07623g		1692	662844	ChrG	724472	722781	C	CAGL-IPF8262|CAGL-CDS1711.1|CAG59620.1		CAL0130677	APE3	YBR286W	YBR286W	Anc_1.298	YBR286W	APE3	Vacuolar aminopeptidase Y; processed to mature form by Prb1p				442	682	675	644	596.962	719.062		658.012	1.29845	0.268476
CAGL0J03608g		1647	129198	ChrJ	347398	345752	C	CAGL-IPF6893|CAGL-CDS1782.1|CAG60810.1		CAL0133100	HCM1	YCR065W	YCR065W	Anc_6.331	YCR065W	HCM1	Forkhead transcription factor; drives S-phase specific expression of genes involved in chromosome segregation, spindle dynamics, and budding; suppressor of calmodulin mutants with specific SPB assembly defects; telomere maintenance role				203	315	215	223	221.933	289.067		255.5	1.29297	0.38128		0
CAGL0E06402g		291	397639	ChrE	643478	643768	W	CAGL-IPF10474|CAGL-CDS5607.1|CAG58887.1		CAL0128714							#N/A				1757	2093	1522	1596	1724.97	1981.96		1853.46	1.29241	0.200354
CAGL0D03696g		888	-180314	ChrD	374717	373830	C	CAGL-IPF4734|CAGL-CDS3793.1|CAG58487.1		CAL0128255	YMR178W	YMR178W	YMR178W	Anc_6.250	YMR178W		Protein of unknown function; green fluorescent protein (GFP)-fusion protein localizes to both the cytoplasm and nucleus; YMR178W is not an essential gene; protein abundance increases in response to DNA replication stress				233	311	157	192	204.714	268.916		236.815	1.29238	0.393549
CAGL0H08778g		3198	-99317	ChrH	854147	857344	W	CAGL-IPF126|CAGL-CDS0359.1|CAG60113.1		CAL0132042	PUF2	YPR042C	YPR042C	Anc_7.462	YPR042C	PUF2	mRNA-binding protein; member of the PUF protein family, which is defined by the presence of Pumilio homology domains that confer RNA binding activity; preferentially binds mRNAs encoding membrane-associated proteins; PUF2 has a paralog, JSN1, that arose from the whole genome duplication	dup			972	1118	874	993	972.507	1141.4		1056.95	1.29148	0.231026
CAGL0D02024g		393	-344431	ChrD	210353	209961	C	CAGL-IPF4831|CAGL-CDS5047.1|CAG58413.1		CAL0128035	MRPL31	YKL138C	YKL138C	Anc_2.428	YKL138C	MRPL31	Mitochondrial ribosomal protein of the large subunit				4	17	17	37	12.4435	31.1635		21.8035	1.29062	1.32446
CAGL0L09845g		1167	68244	ChrL	1056009	1054843	C	CAGL-IPF8772|CAGL-CDS2843.1|CAG62170.1		CAL0135994	YKL023W	YKL023W	YKL023W	Anc_2.666	YKL023W		Putative protein of unknown function; predicted by computational methods to be involved in mRNA degradation; green fluorescent protein (GFP)-fusion protein localizes to the cytoplasm				706	882	571	615	671.19	802.082		736.636	1.28933	0.257028
CAGL0C01078g		1350	-314921	ChrC	106556	107905	W	CAGL0C01067g.2		CAL0000204904							#N/A				128	156	86	138	112.773	159.799		136.286	1.28816	0.502837
CAGL0M03817g		1428	-617658	ChrM	432664	431237	C	CAGL-IPF6783|CAGL-CDS2230.1|CAG62488.1		CAL0137147	YPT11	YNL304W	YNL304W	Anc_3.047	YNL304W	YPT11	Putative Rab family GTPase that interacts with the C-terminal domain of Myo2p; mediates distribution of mitochondria and endoplasmic reticuli to daughter cells				182	220	155	216	178.102	237.468		207.785	1.28805	0.415025
CAGL0L07194g		471	-185987	ChrL	800960	801430	W	CAGL-IPF7685|CAGL-CDS4770.1|CAG62060.1		CAL0136202							#N/A				1082	1307	921	986	1053.62	1231.8		1142.71	1.28781	0.225423
CAGL0K00385g		705	-214725	ChrK	42643	43347	W	CAGL-IPF5178|CAGL-CDS4123.1|CAG61202.1		CAL0134499	CBT1	YKL208W	YKL208W	Anc_1.525	YKL208W	CBT1	Protein involved in 5' RNA end processing; substrates include mitochondrial COB, 15S_rRNA, and RPM1 transcripts; may also have a role in 3' end processing of the COB pre-mRNA; displays genetic interaction with cell cycle-regulated kinase Dbf2p				392	487	287	341	356.428	444.156		400.292	1.28776	0.317452
CAGL0L00205g		429	-973652	ChrL	13744	13316	C	Novel_proteincoding36		CAL0000205357							#N/A				823	989	750	827	829.125	979.708		904.417	1.28647	0.240763
CAGL0D01254g		684	-413891	ChrD	140355	141038	W	CAGL-IPF2642|CAGL-CDS4187.1|CAG58380.1		CAL0128249							#N/A				721	868	731	812	767.571	910.426		838.998	1.28632	0.246242
CAGL0J02200g		435	485	ChrJ	218079	217645	C	CAGL-IPF6485|CAGL-CDS4893.1|CAG60749.1		CAL0133114	SGN1	YIR001C	YIR001C	Anc_7.145	YIR001C	SGN1	Cytoplasmic RNA-binding protein; contains an RNA recognition motif (RRM); may have a role in mRNA translation, as suggested by genetic interactions with genes encoding proteins involved in translational initiation				8758	10413	7620	7470	8612.91	9581.19		9097.05	1.28615	0.153703
CAGL0B03069g	TAL1	1005	-149234	ChrB	301443	302447	W	CAGL-IPF801|CAGL-CDS3297.1|CAG58006.1		CAL0127864	TAL1		YLR354C	Anc_4.188	YLR354C	TAL1	Transaldolase, enzyme in the non-oxidative pentose phosphate pathway; converts sedoheptulose 7-phosphate and glyceraldehyde 3-phosphate to erythrose 4-phosphate and fructose 6-phosphate; TAL1 has a paralog, NQM1, that arose from the whole genome duplication	dup			192	255	173	216	193.101	254.968		224.035	1.28576	0.400957
CAGL0E00605g		360	-191583	ChrE	54580	54221	C	CAGL-IPF5580|CAGL-CDS5189.1|CAG58633.1		CAL0128944	AHC2	YCR082W	YCR082W	Anc_6.358	YCR082W	AHC2	Component of the ADA histone acetyltransferase complex; Ach2p and Ach1p are unique to the ADA complex and not shared with the related SAGA and SLIK complexes; may tether Ach1p to the complex				452	509	292	386	389.206	481.503		435.355	1.28513	0.307011
CAGL0C03597g	ABP1	1743	-62550	ChrC	360473	358731	C	CAGL-IPF950|CAGL-CDS1618.1|CAG58239.1		CAL0127648		YCR088W	YCR088W	Anc_6.366	YCR088W	ABP1	Actin-binding protein of the cortical actin cytoskeleton; important for activation of the Arp2/3 complex that plays a key role actin in cytoskeleton organization; phosphorylation within its PRR (Proline-Rich Region), mediated by Cdc28p and Pho85p, protects Abp1p from proteolysis mediated by its own PEST sequences				649	876	513	502	610.471	732.921		671.696	1.28416	0.263734
CAGL0G07447g		1167	646398	ChrG	707764	706598	C	CAGL-IPF9338|CAGL-CDS2844.1|CAG59612.1		CAL0137699	MRX4	YPL168W	YPL168W	Anc_8.696	YPL168W		Putative protein of unknown function; green fluorescent protein (GFP)-fusion protein localizes to the mitochondrion; expression may be cell cycle-regulated				27	65	33	45	32.8315	59.8475		46.3395	1.28344	0.86621
CAGL0H06193g		3381	-348951	ChrH	604422	607802	W	CAGL-IPF334|CAGL-CDS0292.1|CAG59997.1		CAL0132032	FUN30	YAL019W	YAL019W	Anc_7.080	YAL019W	FUN30	Snf2p family member with ATP-dependent chromatin remodeling activity; has a role in silencing at the mating type locus, telomeres and centromeres; enriched at centromeres and is required for correct chromatin structure around centromeres, as well as at the boundary element of the silent HMR; recruited to DNA double-strand breaks (DSBs) where it promotes 5' strand resection of DSBs; potential Cdc2…				265	368	296	327	297.928	376.459		337.193	1.28143	0.337527
CAGL0M07854g		318	-264297	ChrM	785153	785470	W	CAGL-IPF9238|CAGL-CDS5460.1|CAG62664.1		CAL0136491	LSM8	YJR022W	YJR022W	Anc_5.130	YJR022W	LSM8	Lsm (Like Sm) protein; forms heteroheptameric complex (with Lsm2p, Lsm3p, Lsm4p, Lsm5p, Lsm6p, and Lsm7p) that is part of spliceosomal U6 snRNP and is also implicated in processing of pre-tRNA, pre-snoRNA, and pre-rRNA				12	35	3	11	8.6665	24.9405		16.8035	1.27927	1.52497
CAGL0H06479g	REH1	1236	-316670	ChrH	637775	639010	W	CAGL-IPF302|CAGL-CDS2687.1|CAG60010.1		CAL0131784	REH1	YLR387C	YLR387C	Anc_4.243	YLR387C	REH1	Cytoplasmic 60S subunit biogenesis factor; associates with pre-60S particles; similar to Rei1p and shares partially redundant function in cytoplasmic 60S subunit maturation; contains dispersed C2H2 zinc finger domains				103	175	119	133	118.605	166.371		142.488	1.27722	0.48825
CAGL0L12034g		3378	308804	ChrL	1294297	1297674	W	CAGL-IPF8335|CAGL-CDS0294.1|CAG62265.1		CAL0135336	ECM32	YER176W	YER176W	Anc_8.242	YER176W	ECM32	DNA dependent ATPase/DNA helicase; helicase belonging to the Dna2p- and Nam7p-like family of helicases that is involved in modulating translation termination; interacts with the translation termination factors, localized to polysomes				1420	1608	1216	1361	1386.49	1601.87		1494.18	1.27651	0.208318
CAGL0C02871g		1140	-137149	ChrC	284433	285572	W	CAGL-IPF1009|CAGL-CDS2903.1|CAG58208.1		CAL0127456	PNT1	YOR266W	YOR266W	Anc_8.715	YOR266W	PNT1	Mitochondrial integral inner membrane protein; involved in membrane insertion of C-terminus of Cox2p, interacts genetically and physically with Cox18p; deletion mutant sensitive to the anti-Pneumocystis carinii drug pentamidine				427	672	463	406	471.697	574.713		523.205	1.27475	0.284983
CAGL0H07205g		1110	-246310	ChrH	708198	709307	W	CAGL-IPF244|CAGL-CDS2989.1|CAG60043.1		CAL0131632		YHR069C	YHR069C	Anc_5.345	YHR069C	RRP4	Exosome non-catalytic core component; involved in 3'-5' RNA processing and degradation in both the nucleus and the cytoplasm; predicted to contain RNA binding domains; has similarity to human hRrp4p (EXOSC2)				30	66	25	37	29.8875	55.6635		42.7755	1.27301	0.897189
CAGL0G04169g		1581	337511	ChrG	399084	397504	C	CAGL-IPF7094|CAGL-CDS1926.1|CAG59471.1		CAL0137735	YDR306C	YDR306C	YDR306C	Anc_5.327	YDR306C		F-box protein of unknown function; interacts with Sgt1p via a Leucine-Rich Repeat (LRR) domain				505	564	353	455	449.591	549.403		499.497	1.27276	0.289249
CAGL0J05038g		669	262870	ChrJ	480581	479913	C	CAGL-IPF7016|CAGL-CDS4237.1|CAG60874.1		CAL0133656	YJL055W	YJL055W	YJL055W	Anc_1.327	YJL055W		Putative protein of unknown function; proposed to be involved in the metabolism of purine and pyrimidine base analogues; deletion mutants are sensitive to HAP and AHA; overexpression confers resistance to 5-FOA and 5-FU				201	209	156	244	188.158	248.362		218.26	1.26988	0.4005
CAGL0M09537g		729	-102692	ChrM	947281	946553	C	CAGL-IPF9538|CAGL-CDS4070.1|CAG62737.1		CAL0136949	MRX3	YBL095W	YBL095W	Anc_7.427	YBL095W		Putative protein of unknown function; the authentic, non-tagged protein is detected in highly purified mitochondria in high-throughput studies				113	150	90	131	107.495	152.701		130.098	1.26916	0.506435
CAGL0H01441g		1284	-813681	ChrH	142023	140740	C	CAGL-IPF5816|CAGL-CDS2590.1|CAG59794.1		CAL0130583	PRO1		YDR300C	Anc_5.318	YDR300C	PRO1	Gamma-glutamyl kinase; catalyzes the first step in proline biosynthesis; PRO1 has a paralog, YHR033W, that arose from the whole genome duplication	dup			79	122	67	93	77.7185	116.452		97.085	1.26836	0.583399
CAGL0M10241g		414	-24245	ChrM	1025157	1025570	W	CAGL-IPF8363|CAGL-CDS4965.1|CAG62770.1		CAL0137111	RPL14A	YKL006W	YKL006W	Anc_2.505	YKL006W	RPL14A	Ribosomal 60S subunit protein L14A; N-terminally acetylated; homologous to mammalian ribosomal protein L14, no bacterial homolog; RPL14A has a paralog, RPL14B, that arose from the whole genome duplication				12	36	7	16	10.8885	28.368		19.6283	1.26755	1.38146
CAGL0E02387g		588	-17989	ChrE	227701	228288	W	CAGL-IPF7959|CAGL-CDS4487.1|CAG58712.1		CAL0128744	COQ10	YOL008W	YOL008W	Anc_6.036	YOL008W	COQ10	Coenzyme Q (ubiquinone) binding protein; functions in the delivery of Q<sub>6</sub> to its proper location for electron transport during respiration; START domain protein with homologs in bacteria and eukaryotes				242	305	188	238	226.434	292.849		259.642	1.26684	0.371066
CAGL0J11396g		1260	889777	ChrJ	1107783	1106524	C	CAGL-IPF2899|CAGL-CDS2641.1|CAG61159.1		CAL0133758	SWT21	YNL187W	YNL187W	Anc_2.066	YNL187W	SWT21	Protein involved in mRNA splicing; contains a consensus nuclear export signal (NES) sequence similar to the consensus sequence recognized by Crm1p; interacts genetically with Prp40p and Tgs1p; contains WD40 repeats				1061	1131	1004	1199	1089.22	1268.51		1178.87	1.26665	0.219842
[truncated: 4,350 more rows]
